# Supplementary material for: Unagi: Deep Generative Model for Deciphering Cellular Dynamics and In-Silico Drug Discovery in Complex Diseases
Source: Research Square preprint supplement (doi:10.21203/rs.3.rs-3676579/v1), 2023-12-18
Supplement: Supplementary file 1 [file 036c8cd36a95620be186775a.xlsx]

## Sheet: Sheet 1 - ST1_progression_marke
Table of Significant Dynamic Markers in IPF Progression: This table lists all significant dynamic markers, both increasing and decreasing, with a cutoff q-value of < 0.05. For each track, it includes increasing dynamic markers and decreasing dynamic markers. The "Gene" column displays the names of the genes. The "Log2fc" column shows the log2 fold changes of the gene throughout IPF progression. "…
	VEaero-0																VEcap-1																PerAlv-12																FibAdv-17
	Decreasing Markers								Increasing Markers								Decreasing Markers								Increasing Markers								Decreasing Markers								Increasing Markers								Decreasing Markers
	gene	log2fc	qval	rank	stage0	stage1	stage2	stage3	gene	log2fc	qval	rank	stage0	stage1	stage2	stage3	gene	log2fc	qval	rank	stage0	stage1	stage2	stage3	gene	log2fc	qval	rank	stage0	stage1	stage2	stage3	gene	log2fc	qval	rank	stage0	stage1	stage2	stage3	gene	log2fc	qval	rank	stage0	stage1	stage2	stage3	gene
index
0	EDA	-0.505358	1.24028e-08	1	0.847193	0.448273	0.551528	0.341834	CDH2	1.05971	2.51132e-13	1	0.0446879	0.100671	0.0987175	1.10439	NRXN3	-0.379793	0.000719051	1	0.874002	1.08729	0.934758	0.494209	CXCL12	0.818879	1.93414e-09	1	0.399165	0.432389	0.330295	1.21804	LAMC3	-1.60505	1.08516e-46	1	3.57496	2.08105	2.70326	1.9699	MYOCD	0.972245	5.32907e-14	1	0.240726	0.478665	0.267151	1.21297	AC079298.3
1	GRIN2A	-0.339405	0.000473073	2	0.62686	0.401461	0.366912	0.287455	COL1A1	0.830111	5.79136e-08	2	0.056584	0.321447	0.226351	0.886695	BRINP1	-0.367668	0.000636589	2	0.528588	0.326117	0.271744	0.16092	2	0.746757	5.27684e-08	2	0.184062	0.174013	0.10709	0.930818	LRRTM4	-1.60151	8.7205e-47	2	3.80157	2.70933	3.47085	2.20005	LINC00989	0.921414	1.04983e-12	2	0.0631192	0.112216	0.129705	0.984534	KCND2
2	CDH13	-0.336282	0.000374698	3	0.779529	0.707299	0.743804	0.443247	LINC02694	0.795812	2.02925e-07	3	0.118084	0.210844	0.247939	0.913897	KIAA1217	-0.324909	0.00276775	3	0.837931	1.02917	0.794648	0.513021	DEPP1	0.697372	4.33066e-07	3	0.426273	0.795405	0.815769	1.12364	LINC01099	-1.43248	1.1817e-37	3	3.60898	2.15826	3.00295	2.17651	COL25A1	0.894728	4.28813e-12	3	0.0785999	0.24783	0.23718	0.973328	AOX1
3	FSTL4	-0.335957	0.000286091	4	0.899471	0.675999	0.892255	0.563514	CX3CL1	0.76323	6.86714e-07	4	0.661207	0.736395	0.820664	1.42444	EGFL7	-0.319901	0.00254927	4	0.711757	0.592188	0.566671	0.391856	MGP	0.661102	1.82492e-06	4	0.3479	0.577093	0.450366	1.009	AC073091.1	-1.37592	6.7881e-35	4	3.30269	1.72376	2.51454	1.92677	TEX41	0.882988	7.01572e-12	4	0.238298	0.418921	0.372575	1.12129	GFRA1
4	GRM8	-0.313618	0.000752413	5	1.58231	1.22799	1.08597	1.26869	PLD5	0.705946	6.59479e-06	5	0.0629465	0.118327	0.151783	0.768893	ABCC8	-0.304138	0.00381928	5	0.564843	0.380765	0.491491	0.260705	ATP13A3	0.522471	0.000430417	5	0.230196	0.508811	0.3277	0.752667	KCNK3	-1.31607	4.57989e-32	5	3.7278	2.3919	3.00683	2.41173	ACTG2	0.793998	1.4544e-09	5	0.481636	1.05977	0.652019	1.27563	NLGN1
5	PCDH11X	-0.300845	0.00119824	6	0.41707	0.189235	0.200043	0.116225	COL3A1	0.637118	8.27012e-05	6	0.108327	0.553379	0.457217	0.745444	RTKN2	-0.283906	0.00682305	6	0.354324	0.149763	0.113595	0.0704176	EDN1	0.499595	0.000798795	6	0.457197	0.753536	0.69713	0.956792	CDH6	-1.12577	1.06824e-23	6	3.87754	2.91481	3.55968	2.75176	SYNPO2	0.775043	3.65082e-09	6	0.188662	0.63295	0.32848	0.963705	EBF1
6	DCHS2	-0.299615	0.00109178	7	1.06958	0.615205	0.732793	0.769961	KCNN2	0.609116	0.000196119	7	0.502274	0.828476	0.857956	1.11139	PRICKLE2	-0.272219	0.00888989	7	0.579825	0.686865	0.456985	0.307605	CCN2	0.477704	0.00142084	7	0.299238	0.504043	0.594537	0.776942	ADARB2	-1.12521	9.65815e-24	7	2.9757	2.30444	2.71955	1.85049	CNN1	0.689109	3.25159e-07	7	0.472521	0.644642	0.360885	1.16163	IGF1
7	GALNT13	-0.290245	0.00151062	8	0.338769	0.0533526	0.152048	0.0485236	F2RL3	0.585726	0.000386663	8	0.329907	0.339173	0.56108	0.915633	NAV3	-0.269792	0.00846868	8	0.503297	0.457118	0.236274	0.233506	GJA5	0.46388	0.00193595	8	0.502716	0.847444	0.802966	0.966596	AFF2	-1.01799	1.28796e-19	8	2.24328	1.79165	1.71519	1.22528	ADGRL3	0.685647	3.38892e-07	8	0.293691	0.652697	0.288086	0.979338	AC092691.1
8	LGR5	-0.288633	0.00145111	9	0.525714	0.182973	0.234815	0.237082	LINC00578	0.565363	0.000677999	9	0.14858	0.304735	0.246697	0.713943	BAALC	-0.254101	0.0128269	9	0.447947	0.430145	0.401229	0.193846	BPIFB1	0.443499	0.00322297	9	0.0963817	0.265871	0.376644	0.539881	UNC5D	-1.00535	3.34728e-19	9	2.44556	1.7116	2.25439	1.44021	DGKB	0.684499	3.1916e-07	9	0.192321	0.255807	0.193565	0.876819	SLIT3
9	LINC01811	-0.274448	0.00254247	10	0.327697	0.0862427	0.320701	0.0532495	TENM3	0.503892	0.00405841	10	0.0925656	0.291232	0.313991	0.596458	GRK5	-0.237128	0.0199018	10	0.728685	0.901703	0.78214	0.491557	HRH1	0.434967	0.00373837	10	0.331366	0.470267	0.564843	0.766333	AC110614.1	-0.895953	1.87275e-15	10	2.44784	1.79781	2.42009	1.55189	COL14A1	0.661321	9.02234e-07	10	0.141576	0.53649	0.381693	0.802897	VIPR2
10	LINC01060	-0.271758	0.0026139	11	0.394794	0.358247	0.512175	0.123036	COL6A3	0.5016	0.00394176	11	0.168574	0.30087	0.376465	0.670174	FCN3	-0.233464	0.0202621	11	1.04106	1.42878	1.1432	0.807592	BMX	0.420274	0.00519572	11	0.150135	0.0781758	0.0881956	0.57041	ADAMTSL3	-0.863993	1.81308e-14	11	1.89483	1.56319	1.68888	1.03084	COL1A1	0.657519	9.85618e-07	11	0.0730563	0.34997	0.292947	0.730575	RSPO3
11	GPM6A	-0.266844	0.00299184	12	0.43903	0.19262	0.2678	0.172186	LUM	0.495908	0.00425234	12	0.102432	0.294157	0.195859	0.59834	RAMP3	-0.222489	0.0258376	12	0.789093	1.17876	0.778844	0.566603	COL1A2	0.420104	0.00478575	12	0.0877981	0.269894	0.158831	0.507903	GUCY1A2	-0.846534	5.83968e-14	12	3.41808	2.71975	2.93524	2.57154	PI15	0.598917	1.32937e-05	12	0.118843	0.197522	0.29453	0.71776	NEGR1
12	AC022325.2	-0.26178	0.00345918	13	0.331293	0.091266	0.214008	0.0695124	AP000561.1	0.494841	0.00404602	13	0.0391066	0.0749276	0.0631197	0.533947	AC137810.1	-0.220312	0.0254233	13	0.414599	0.550503	0.490654	0.194287	COL3A1	0.416588	0.00487854	13	0.0562251	0.275259	0.145173	0.472813	CDH19	-0.803484	1.07375e-12	13	1.37027	0.915547	0.943519	0.566782	COL3A1	0.590183	1.7904e-05	13	0.133098	0.525753	0.433654	0.723282	TNFAIP8L3
13	RTKN2	-0.247118	0.00603825	14	0.507116	0.42586	0.391318	0.259997	AC025580.1	0.494121	0.00383449	14	0.0378522	0.0482208	0.0371557	0.531973	CD36	-0.215856	0.026859	14	0.334896	0.2616	0.116503	0.119041	IL6	0.402663	0.00665221	14	0.379069	0.640347	0.50679	0.781732	HTR1F	-0.783435	3.81251e-12	14	3.06988	2.20994	2.78707	2.28645	SLC38A11	0.589658	1.70036e-05	14	0.294363	0.179667	0.186385	0.884022	MFAP5
14	CNTN6	-0.246977	0.00566924	15	0.363084	0.183559	0.175643	0.116107	PTCHD4	0.488472	0.00419573	15	0.151634	0.784665	0.706626	0.640106	NTRK2	-0.212307	0.0277376	15	0.476718	0.629208	0.337322	0.264411	MMP19	0.402381	0.00625627	15	0.0536238	0.32318	0.155242	0.456005	AL139220.2	-0.777896	5.12459e-12	15	2.03509	1.21974	1.86999	1.25719	TAGLN	0.557718	5.9994e-05	15	0.283215	0.676009	0.549293	0.840933	GRM7
15	NECAB1	-0.244203	0.00596786	16	0.325279	0.0684003	0.183254	0.0810755	CPA6	0.487942	0.00399219	16	0.0776492	0.192033	0.130273	0.565591	AL591501.1	-0.210301	0.027517	16	0.345094	0.396023	0.194002	0.134793	EMP1	0.397202	0.00674155	16	0.691827	0.911812	0.774189	1.08903	NRCAM	-0.761847	1.3628e-11	16	2.13951	1.69857	1.8694	1.37767	SMOC2	0.542974	0.000101178	16	0.0724612	0.264916	0.196653	0.615435	SPOCK1
16	GRID1	-0.242403	0.00605204	17	0.422917	0.30823	0.363432	0.180514	COMP	0.484006	0.00419227	17	0.0656445	0.123101	0.119267	0.54965	TMCC3	-0.203352	0.0313943	17	0.506826	0.605674	0.395673	0.303474	SERPINE1	0.381766	0.00949975	17	0.226005	0.524555	0.358169	0.607771	AC093791.2	-0.760183	1.42736e-11	17	1.70764	0.769806	1.42017	0.947453	FHL5	0.534142	0.000134283	17	1.97622	1.87933	1.9341	2.51037	PLA2G2A
17	PDE1C	-0.238921	0.00659456	18	1.04309	1.09234	0.904304	0.804167	MOXD1	0.482454	0.00413304	18	0.103693	0.410672	0.25206	0.586147	FENDRR	-0.201558	0.0311338	18	0.703341	0.905833	0.75578	0.501783	RASGRF2	0.381508	0.00903146	18	0.229792	0.347571	0.203601	0.6113	DOK6	-0.728305	1.00006e-10	18	2.54486	2.138	2.38564	1.81656	PRRX1	0.514451	0.000267037	18	0.161167	0.311997	0.368683	0.675618	ANK2
18	ABCA1	-0.234761	0.00739472	19	0.44845	0.314131	0.359619	0.213689	RUNX2	0.47293	0.00507901	19	0.172679	0.223449	0.246888	0.645609	AL356124.1	-0.197034	0.0333048	19	0.60595	0.760231	0.553034	0.408916	LUM	0.370982	0.0111553	19	0.0829946	0.223327	0.161541	0.453977	TARID	-0.676698	2.03664e-09	19	1.61306	0.821453	1.12552	0.936365	AP005212.4	0.506221	0.000342299	19	0.289766	0.243841	0.373674	0.795987	CCDC80
19	RTN1	-0.232847	0.00758536	20	1.13233	0.961777	1.0755	0.899485	BIRC3	0.469444	0.00529986	20	0.263889	0.176637	0.262645	0.733333	BTNL8	-0.196871	0.0317771	20	0.442406	0.253546	0.631312	0.245536	AREG	0.356954	0.0149088	20	0.0919896	0.36355	0.145344	0.448943	TRPC4	-0.65644	6.07881e-09	20	1.82271	1.38296	1.60248	1.16627	LINC00924	0.502362	0.000374046	20	0.298287	0.261301	0.233542	0.800649	LINC00968
20	GALNTL6	-0.231014	0.00777128	21	0.435981	0.126987	0.215944	0.204968	C7	0.465226	0.00564881	21	0.134295	0.19051	0.250286	0.59952	F2RL3	-0.196557	0.0305174	21	0.927943	1.60526	1.15691	0.731386	AC008522.1	0.354924	0.0149007	21	0.138498	0.154949	0.146732	0.493422	TRPC6	-0.644085	1.14479e-08	21	2.17942	1.56023	2.10251	1.53533	SULF1	0.488722	0.00057895	21	0.0812656	0.322818	0.235332	0.569988	SVEP1
21	CADM2	-0.227458	0.0085347	22	0.310224	0.14126	0.11146	0.0827656	GABBR2	0.460338	0.00613497	22	0.288577	0.455379	0.256739	0.748915	RASGRP3	-0.190222	0.0343897	22	0.298349	0.163641	0.179503	0.108127	SERPINE2	0.333873	0.0230588	22	0.114495	0.0745948	0.089202	0.448369	GABRB2	-0.628976	2.47328e-08	22	1.2027	0.790292	0.923544	0.57372	LUM	0.475208	0.000881661	22	0.128659	0.346236	0.268141	0.603867	SLC35F4
22	SLC39A8	-0.226639	0.00842961	23	0.477615	0.282236	0.330043	0.250976	KRT6A	0.456361	0.00651114	23	0.0753927	0.0989862	0.0635554	0.531754	ITGA6	-0.179913	0.0426874	23	0.581753	0.726484	0.622993	0.401839	PTGIS	0.306248	0.0396791	23	0.203694	0.288856	0.259221	0.509942	AC018616.1	-0.616335	4.61943e-08	23	1.18344	0.530088	0.768973	0.567106	LINC01060	0.472808	0.000914924	23	0.0531941	0.20977	0.0962181	0.526002	GREB1
23	RGS6	-0.217182	0.0116154	24	0.624521	0.640819	0.79921	0.407339	TFPI2	0.449239	0.00749867	24	0.274044	0.548698	0.290613	0.723282	SEMA6A	-0.176519	0.0444601	24	0.478729	0.436345	0.404563	0.302209	PLA1A	0.301293	0.0420154	24	0.438558	0.552528	0.351656	0.739851	TBX5	-0.615317	4.66934e-08	24	1.85277	0.908417	1.48989	1.23745	KCNE4	0.461513	0.00127914	24	0.41846	0.315766	0.549214	0.879973	MEDAG
24	GLS	-0.217133	0.0111717	25	0.385644	0.303145	0.326065	0.168511	CCN2	0.447526	0.00752051	25	0.232688	0.235387	0.267332	0.680214	KHDRBS2	-0.171365	0.0483176	25	0.38796	0.429726	0.288558	0.216595	COL1A1	0.297141	0.0437947	25	0.0549929	0.134501	0.17107	0.352134	PLCB1	-0.611844	5.37364e-08	25	2.2489	1.78619	2.12423	1.63705	CDH2	0.458431	0.00135896	25	0.00925241	0.120677	0.0699848	0.467683	LSAMP
25	CACNA2D3	-0.216632	0.0109465	26	0.300805	0.102484	0.182959	0.0841725	COL24A1	0.441313	0.0084618	26	0.114251	0.43112	0.428945	0.555564	AKAP12	-0.169328	0.0487542	26	0.903337	1.49968	1.13345	0.734009	CD9	0.296494	0.0426488	26	0.178093	0.392378	0.192546	0.474588	PAG1	-0.602056	8.56705e-08	26	2.32764	1.82169	2.10185	1.72558	COL1A2	0.439526	0.00239517	26	0.324211	0.73891	0.670772	0.763737	FGF7
26	AC002066.1	-0.210998	0.0130033	27	0.388442	0.320555	0.318985	0.177445	SMOC2	0.435974	0.00930932	27	0.0819086	0.0727449	0.185277	0.517882	ADGRL2	-0.168637	0.0477178	27	0.812242	0.820799	0.902445	0.643605	ACE2	0.288833	0.047641	27	0.100471	0.15615	0.0306492	0.389304	P2RY14	-0.592071	1.37076e-07	27	1.69105	1.20867	1.42043	1.09898	ADAMTS5	0.43832	0.0023952	27	0.19662	0.27029	0.364963	0.63494	WT1
27	LINC02055	-0.208231	0.0138772	28	0.298056	0.178169	0.146182	0.0898244	CLEC4F	0.419134	0.0135103	28	0.0651247	0.0540559	0.0604315	0.484258	HECW2	-0.16594	0.0490029	28	0.641337	0.819598	0.835125	0.475397	THBS1	0.2883	0.0464094	28	0.155621	0.318576	0.100975	0.443921	MAP1B	-0.555149	8.05713e-07	28	2.74254	2.16711	2.40204	2.18739	EPHA3	0.435534	0.00251897	28	0.12966	0.270563	0.312714	0.565194	PAPPA
28	SLC7A11	-0.202079	0.0167241	29	0.272477	0.133367	0.10478	0.0703979	THBS1	0.416818	0.0137804	29	0.271796	0.282399	0.357873	0.688613									CCDC3	0.28396	0.0486469	29	0.0516059	0.109216	0.0598354	0.335565	AUXG01000058.1	-0.548783	1.0506e-06	29	1.17914	0.732051	1.04778	0.63036	AC024901.1	0.435426	0.00244027	29	0.0965533	0.193777	0.332607	0.53198	AC093765.3
29	SEMA6A	-0.20204	0.0161895	30	0.694344	0.763758	0.721433	0.492304	RHOH	0.416227	0.0135082	30	0.207997	0.189527	0.411754	0.624224									COL6A3	0.28017	0.0488423	30	0.132236	0.16779	0.224289	0.412406	ADGRD1	-0.513322	5.10137e-06	30	0.997612	0.682181	0.660449	0.484289	FHL2	0.432855	0.00255416	30	0.17628	0.255697	0.335082	0.609135	DCLK1
30	EBF2	-0.200841	0.0163483	31	0.297599	0.121797	0.193263	0.096758	HAS2	0.415295	0.0133627	31	0.0637457	0.166527	0.248617	0.479041									SAT1	0.275643	0.0498623	31	0.346728	0.41273	0.356328	0.622371	PKNOX2	-0.47077	2.99653e-05	31	1.14308	0.674692	0.909715	0.672314	DCLK1	0.432546	0.00249542	31	0.09132	0.244288	0.183818	0.523866	C3
31	PRTG	-0.196212	0.0186324	32	0.382414	0.227084	0.289428	0.186202	ITGBL1	0.412683	0.0137633	32	0.267198	0.198473	0.32501	0.679881																	EGFEM1P	-0.447988	7.18223e-05	32	1.06488	0.920466	0.994426	0.616888	CCDC80	0.432399	0.00242843	32	0.0743947	0.233105	0.222854	0.506794	ADAMTSL3
32	AC068587.4	-0.194239	0.0193453	33	0.372849	0.328457	0.290516	0.17861	TMEM132D	0.412538	0.0133915	33	0.0668185	0.119023	0.167183	0.479356																	BMPER	-0.447276	7.15984e-05	33	0.875367	0.650791	0.616386	0.428092	PDE1A	0.426423	0.0028269	33	0.0945966	0.201363	0.19393	0.521019	MIR100HG
33	LINC01290	-0.192585	0.0198752	34	0.36742	0.315416	0.337597	0.174835	LINC00636	0.408363	0.0143222	34	0.0216814	0.0206706	0.0325267	0.430045																	SGIP1	-0.437143	0.00010254	34	1.74638	1.54122	1.62198	1.30923	MIR31HG	0.42634	0.00275067	34	0.0330277	0.0967146	0.0882716	0.459367	TNFSF14
34	PCSK2	-0.189934	0.0211338	35	0.317898	0.101567	0.141016	0.127964	ICAM1	0.406583	0.0144965	35	0.41677	0.395081	0.574837	0.823353																	LAMB1	-0.436124	0.000103538	35	1.62929	1.37313	1.45124	1.19316	MSC-AS1	0.421659	0.00307726	35	0.187263	0.338975	0.327488	0.608922	MAMDC2
35	EPB41L5	-0.188321	0.0216975	36	0.407517	0.23619	0.282854	0.219196	MEG8	0.401511	0.0158267	36	0.181501	0.24302	0.358674	0.583013																	ADGRG6	-0.417631	0.000200182	36	0.989439	0.828803	0.86159	0.571807	NFASC	0.414978	0.00364939	36	0.147819	0.302199	0.181576	0.562797	AL158835.1
36	RAPGEF5	-0.186572	0.0223876	37	0.566047	0.557744	0.557341	0.379475	PDE1A	0.39059	0.0196643	37	0.135222	0.214603	0.277281	0.525812																	LINC01088	-0.411933	0.000239412	37	1.38592	0.78997	1.15447	0.973987	IRAG1	0.404602	0.00480214	37	0.291112	0.513314	0.44895	0.695714	FBLN1
37	LRRC36	-0.186517	0.0218383	38	0.241169	0.193945	0.142744	0.0546515	FHL2	0.386849	0.0207858	38	0.0439621	0.139741	0.131392	0.430811																	LPAR1	-0.387155	0.000555036	38	1.48613	1.08141	1.34905	1.09897	KCNMA1	0.401418	0.00512127	38	0.150536	0.412706	0.310968	0.551954	BRINP3
38	ADRA1A	-0.186264	0.0214587	39	0.231466	0.0490922	0.111106	0.0452018	IGF1	0.382843	0.0220943	39	0.0840754	0.155116	0.214879	0.466918																	RBFOX1	-0.381831	0.000647493	39	0.826798	0.484327	0.750771	0.444966	CLCA4	0.397849	0.00552113	39	0.168367	0.134203	0.182149	0.566216	RARRES1
39	SCN1A	-0.18622	0.0209536	40	0.374444	0.23284	0.322748	0.188224	BICC1	0.379634	0.0230813	40	0.180854	0.407424	0.414437	0.560488																	AC009570.2	-0.380842	0.000652638	40	1.71485	1.44252	1.6905	1.33401	AC008591.1	0.39706	0.005504	40	0.0361569	0.104437	0.121791	0.433217	DPYS
40	ADGRV1	-0.186018	0.0205804	41	0.377548	0.302604	0.286101	0.19153	AC009262.1	0.379056	0.0227989	41	0.0638603	0.0165337	0.0451421	0.442916																	IGHV3-23	-0.357623	0.0013581	41	0.938831	0.444955	0.993879	0.581208	LINC00578	0.391198	0.00632475	41	0.0918735	0.411328	0.166063	0.483072	ABI3BP
41	BTBD9	-0.182016	0.0229345	42	0.399905	0.420671	0.393793	0.21789	MARCHF4	0.37614	0.0236817	42	0.129749	0.410815	0.357147	0.505888																	PWRN1	-0.351576	0.00160377	42	0.648915	0.469594	0.521625	0.297339	HPSE2	0.38452	0.00741664	42	0.0787518	0.572699	0.3926	0.463272	LINC02099
42	LSAMP	-0.181399	0.0228586	43	0.336281	0.272724	0.271179	0.154882	SYT14	0.375995	0.0232021	43	0.0441145	0.0533409	0.0446611	0.42011																	NCALD	-0.33568	0.00254882	43	1.03403	0.880113	0.929855	0.698348	AC011246.1	0.375584	0.00921089	43	0.171009	0.40223	0.351339	0.546593	AC097518.2
43	AC095050.1	-0.178986	0.024164	44	0.256488	0.0609989	0.181242	0.0775017	FAP	0.375211	0.0230543	44	0.0433207	0.207935	0.183001	0.418532																	DGKG	-0.332755	0.00271851	44	2.24054	2.04621	2.00017	1.90779	LINC02398	0.362686	0.0125991	44	0.0537706	0.164213	0.230528	0.416456	KAZN
44	SEMA3E	-0.178532	0.0239771	45	0.247178	0.0948122	0.144015	0.0686465	POT1-AS1	0.371353	0.0244481	45	0.111294	0.194829	0.134312	0.482647																	LINC02408	-0.331724	0.00274081	45	1.03908	1.13393	1.26161	0.707355	THBS2	0.362308	0.0124386	45	0.0478242	0.0840145	0.187902	0.410132	GPC6
45	AC112206.2	-0.178374	0.0235753	46	0.339975	0.109789	0.175674	0.161601	CITED4	0.36595	0.0267565	46	0.0810214	0.170608	0.266518	0.446972																	FRMD4B	-0.330874	0.00274976	46	1.02051	0.88298	0.959082	0.68964	ACTA2	0.361261	0.0124979	46	0.953707	1.13723	0.920907	1.31497	AC011246.1
46	NTRK2	-0.177841	0.0234741	47	0.238709	0.108265	0.0801852	0.0608683	CCDC80	0.365092	0.0266536	47	0.0766977	0.146089	0.227414	0.44179																	RNF152	-0.324978	0.00320067	47	1.05921	0.63806	0.678791	0.734227	PVT1	0.352828	0.0151249	47	0.127025	0.22387	0.259002	0.479854	LPAR1
47	PCDH9	-0.172824	0.0269719	48	0.2866	0.230952	0.322912	0.113776	THBS2	0.355382	0.0317764	48	0.0651747	0.192498	0.204745	0.420557																	RFTN1	-0.323601	0.00326229	48	0.924235	0.797903	0.794537	0.600634	PLD5	0.350916	0.0155289	48	0.0403489	0.117373	0.154705	0.391265	SEMA3D
48	ACOXL	-0.169701	0.029136	49	0.343171	0.220761	0.225418	0.17347	CCL2	0.354044	0.0319701	49	0.356044	0.354529	0.443913	0.710088																	AC073050.1	-0.311055	0.00457419	49	1.1467	0.69401	0.856817	0.835648	KCND2	0.343801	0.0181045	49	0.0557092	0.175306	0.174173	0.39951	ENPEP
49	CACHD1	-0.169304	0.0289076	50	0.354575	0.32791	0.361755	0.185272	COL1A2	0.347322	0.0357705	50	0.14313	0.513715	0.412684	0.490452																	MYO1B	-0.305092	0.00529312	50	1.09319	1.03047	0.928423	0.788096	EYA2	0.340652	0.0191407	50	0.075147	0.189804	0.194425	0.415799	AUXG01000058.1
50	ATP8B5P	-0.167368	0.0300883	51	0.247032	0.0897577	0.112383	0.0796632	PDGFD	0.340476	0.0400282	51	0.14979	0.256999	0.348933	0.490266																	SEMA6D	-0.302523	0.00556995	51	1.13951	0.774356	1.02676	0.83699	ITGA11	0.339839	0.0191342	51	0.0704386	0.0738572	0.134168	0.410278	SLIT2
51	ADK	-0.165758	0.0310039	52	0.301307	0.244186	0.276453	0.135549	DCLK1	0.337968	0.0411795	52	0.0942063	0.292575	0.256492	0.432174																	SAMD5	-0.290687	0.00751891	52	0.654666	0.505616	0.607345	0.363978	CSRNP3	0.338244	0.0194938	52	0.110876	0.21515	0.224193	0.449121	AL160272.2
52	ST8SIA6	-0.165724	0.0304507	53	0.264419	0.171469	0.214057	0.0986948	CXCL10	0.337232	0.0409695	53	0.0866091	0.0946898	0.117084	0.423841																	COL5A3	-0.289684	0.00757573	53	0.945343	0.58239	0.73649	0.655658	GEM	0.336403	0.0199803	53	0.100288	0.259184	0.198173	0.436692	AC077690.1
53	EXPH5	-0.165006	0.0305486	54	0.534568	0.482825	0.481228	0.369562	HPSE2	0.335795	0.0413175	54	0.0825452	0.381356	0.426055	0.41834																	NKD1	-0.287356	0.00790626	54	0.555362	0.223425	0.32216	0.268005	CLSTN2	0.332128	0.0216835	54	0.221528	0.191217	0.195388	0.553657	AC079760.2
54	EGFL7	-0.160947	0.0339015	55	0.646445	0.59261	0.57105	0.485498	ITGA11	0.334999	0.0411786	55	0.0752342	0.111343	0.191392	0.410233																	BX284613.2	-0.286674	0.00790282	55	0.681903	0.535354	0.580378	0.395229	CTNNA3	0.324014	0.0256698	55	0.156214	0.291616	0.195278	0.480228	CLSTN2
55	CFTR	-0.159689	0.0345687	56	0.292849	0.30057	0.367283	0.133159	KCNQ5	0.333474	0.0416169	56	0.212512	0.204634	0.307116	0.545987																	RTKN2	-0.28193	0.00878273	56	0.392342	0.179346	0.264756	0.110411	KIF26B	0.316042	0.0301582	56	0.0859264	0.153814	0.207957	0.401969	TWIST2
56	AC090001.1	-0.157757	0.0359619	57	0.168733	0.0649702	0.0645986	0.0109764	AC007368.1	0.333438	0.040915	57	0.0437139	0.115944	0.0918255	0.377151																	TESC	-0.271193	0.0113415	57	0.55864	0.321494	0.414178	0.287447	LINC02388	0.315037	0.0302963	57	0.111182	0.14402	0.152436	0.426219	CACNA2D3
57	ARHGEF38	-0.154138	0.0392842	58	0.349455	0.240131	0.281215	0.195318	PCDH7	0.330085	0.0427987	58	0.102723	0.338661	0.349446	0.432808																	RYR2	-0.265594	0.0128094	58	1.33415	1.2604	1.22387	1.06856	LDB3	0.310008	0.0332465	58	0.525726	0.398098	0.215939	0.835734	LINC01411
58	ANOS1	-0.152591	0.0403816	59	0.378358	0.353014	0.358173	0.225767	FSTL3	0.330062	0.0420914	59	0.167335	0.143447	0.219743	0.497398																	XYLT1	-0.26373	0.013182	59	1.43325	1.01659	1.4017	1.16952	BICC1	0.308398	0.0338447	59	0.120908	0.249118	0.253846	0.429306	PRRX1
59	CD55	-0.152576	0.0397261	60	0.306448	0.204035	0.263316	0.153872	MSC-AS1	0.327772	0.0431765	60	0.126826	0.211366	0.32552	0.454598																	CHRM2	-0.254482	0.0162048	60	0.356943	0.0717732	0.0825487	0.102461	RGS6	0.308311	0.0333432	60	0.112041	0.178513	0.22912	0.420352	AC006206.2
60	CHRM3	-0.151287	0.0405462	61	0.686196	0.665598	0.650659	0.534909	FGF7	0.325041	0.0446464	61	0.18675	0.244592	0.273282	0.511791																	DACH1	-0.254178	0.0160549	61	0.733896	0.607104	0.695838	0.479718	SFRP2	0.305639	0.0347392	61	0.01093	0.120443	0.127975	0.316569	NGF
61	AJAP1	-0.151141	0.0400591	62	0.596153	0.218364	0.362965	0.445012	PPFIA2	0.324362	0.0444725	62	0.109628	0.239966	0.270683	0.43399																	AL033504.1	-0.253195	0.0161687	62	0.574497	0.482472	0.537089	0.321303	AREG	0.30525	0.034465	62	0.101954	0.358198	0.224113	0.407204	P2RY14
62	PTPRQ	-0.150774	0.0398381	63	0.305908	0.0788175	0.148718	0.155134	TEX41	0.324279	0.0438323	63	0.132323	0.301991	0.277282	0.456603																	PDZRN4	-0.25047	0.0169686	63	0.941203	0.705195	0.94309	0.690733	NHS	0.301841	0.0364715	63	0.263792	0.301285	0.31595	0.565633	AL445430.2
63	OBI1-AS1	-0.149928	0.0401712	64	0.669646	0.498706	0.624731	0.519718	ANK2	0.323522	0.0437449	64	0.154312	0.316455	0.397427	0.477835																	LAMA2	-0.250269	0.0167826	64	0.881106	0.761546	0.831401	0.630837	SLIT3	0.301469	0.0361849	64	0.352269	0.567745	0.390556	0.653738	PHLDB2
64	SYNPO2	-0.149411	0.0401378	65	0.433676	0.567921	0.523707	0.284265	ISM1	0.323431	0.043143	65	0.0813214	0.141616	0.185776	0.404753																	FAM162B	-0.249482	0.0168321	65	1.03914	0.87032	1.10701	0.789659	RHOH	0.300282	0.0365322	65	0.163314	0.272035	0.300099	0.463595	LAMA2
65	TMCC1	-0.149396	0.0395462	66	0.441993	0.456596	0.358661	0.292597	SYTL2	0.323266	0.0426168	66	0.130274	0.317798	0.254144	0.45354																	LHFPL6	-0.247675	0.0172914	66	1.00289	0.851444	0.9024	0.755219	SCN3A	0.299429	0.0366299	66	0.0423839	0.0566365	0.060811	0.341812	LRFN5
66	AP002856.2	-0.149253	0.0391142	67	0.226072	0.0356089	0.143102	0.0768193	KIF26B	0.323264	0.0419824	67	0.11677	0.343537	0.286696	0.440033																	FAM153CP	-0.244179	0.0184694	67	0.464465	0.215384	0.33316	0.220286	TNC	0.298947	0.0364492	67	0.0893038	0.345211	0.235741	0.388251	SYBU
67	AL591501.1	-0.148735	0.0391078	68	0.201876	0.0830963	0.095823	0.053141	TP63	0.317137	0.0461738	68	0.239167	0.357575	0.517505	0.556305																	DENND2A	-0.241373	0.0194061	68	1.11757	0.974241	1.03399	0.876195	ZNF385D	0.298532	0.0362269	68	0.0927372	0.454714	0.265102	0.391269	SDK1
68	IL1RAPL1	-0.148231	0.0390927	69	0.562826	0.354763	0.382673	0.414595	EPHA3	0.314443	0.0477273	69	0.332797	0.406966	0.339301	0.64724																	GRK5	-0.240406	0.0195506	69	0.971148	0.71746	0.820999	0.730742	FN1	0.29829	0.0358832	69	0.218573	0.502439	0.332396	0.516863	RTKN2
69	FOXP2	-0.148006	0.0387798	70	0.349417	0.372358	0.288035	0.201412	COL14A1	0.313991	0.0474215	70	0.081577	0.368401	0.37059	0.395568																	ABCC9	-0.225079	0.0270692	70	0.80534	0.639456	0.6325	0.580261	PTGER3	0.297815	0.0357233	70	0.0428206	0.0627411	0.0738469	0.340636	PDZRN4
70	RASGRP3	-0.147536	0.0387418	71	0.305	0.43781	0.337929	0.157464	TENM4	0.313499	0.0471599	71	0.0901953	0.194375	0.208785	0.403694																	SOX5	-0.222451	0.0282391	71	1.0829	0.929056	0.981275	0.860444	EBF2	0.297715	0.0352942	71	0.830296	0.588965	0.890967	1.12801	AKR1C1
71	ATP8A1	-0.147049	0.0387293	72	0.400693	0.283048	0.296464	0.253644	FRMD5	0.312769	0.0471041	72	0.0655553	0.295638	0.204519	0.378324																	HAPLN1	-0.217785	0.0307472	72	0.75787	0.492543	0.788826	0.540085	THBS1	0.297433	0.0350089	72	0.267661	0.699529	0.407567	0.565095	NR4A3
72	NRXN1	-0.145385	0.0400139	73	0.318261	0.196517	0.221737	0.172876	PLAT	0.312543	0.0466435	73	0.219705	0.236768	0.297527	0.532248																	PDZD2	-0.217409	0.030567	73	0.779831	0.594262	0.77374	0.562422	POSTN	0.295918	0.0356353	73	0.116783	0.282575	0.182161	0.412701	EPHB2
73	CPM	-0.144725	0.0402035	74	0.404558	0.35784	0.388549	0.259834	CRACD	0.311565	0.0468062	74	0.0915964	0.229229	0.206813	0.403162																	SPDYA	-0.213945	0.0324189	74	0.355767	0.103435	0.110037	0.141822	PTPRZ1	0.294071	0.0365222	74	0.032269	0.159049	0.162699	0.32634	CNTNAP2
74	LINC02006	-0.142858	0.0417629	75	0.24069	0.0870902	0.177674	0.0978317	HPGD	0.310338	0.0471799	75	1.47274	1.68392	1.47876	1.78308																	PTPRD	-0.213322	0.0324027	75	0.632359	0.582489	0.603262	0.419036	LINC02360	0.290907	0.0384501	75	0.0576649	0.0550688	0.0870513	0.348572	AL513166.1
75	BMPER	-0.142796	0.0412837	76	0.257211	0.219016	0.258523	0.114415	FBN1	0.310271	0.0466137	76	0.17744	0.277138	0.360177	0.487711																	AC106799.2	-0.206973	0.0364212	76	0.662344	0.279736	0.51771	0.455371	GPC6	0.289175	0.0393042	76	0.232859	0.305149	0.404769	0.522034	EPHA6
76	SMAD6	-0.142363	0.0412344	77	0.505191	0.518329	0.489266	0.362828	PRRX1	0.308641	0.0473275	77	0.106885	0.320997	0.353771	0.415525																	ADAMTS9	-0.206217	0.0365025	77	1.07178	0.936371	0.907814	0.865564	ADAMTS14	0.28912	0.0388369	77	0.0655805	0.0809404	0.0918995	0.3547	CCDC102B
77	CGNL1	-0.142228	0.0408562	78	0.382122	0.266685	0.260687	0.239894	MAP1B	0.308089	0.0471678	78	0.124774	0.189107	0.312441	0.432863																	PRKCB	-0.199856	0.0409184	78	0.683302	0.409198	0.641689	0.483446	TESMIN	0.288259	0.0390129	78	0.0630515	0.0168191	0.0726803	0.35131	C1orf21
78	TMTC2	-0.141614	0.0410216	79	0.445774	0.350415	0.441224	0.30416	THRB-AS1	0.305776	0.0484602	79	0.243782	0.26995	0.367864	0.549558																	DLC1	-0.198866	0.0411965	79	0.857619	0.808081	0.797774	0.658753	ITGB8	0.287244	0.0393156	79	0.0854754	0.212172	0.187875	0.372719	ADAMTS3
79	SEMA6D	-0.140283	0.0420013	80	0.181072	0.213093	0.299155	0.040789	TIMP1	0.303673	0.0496038	80	0.257922	0.40524	0.321861	0.561595																	AP000769.1	-0.193954	0.044771	80	0.417188	0.204726	0.351984	0.223234	LTBP1	0.285617	0.0401126	80	0.133451	0.366933	0.21995	0.419068	HHIP
80	HHIP	-0.139328	0.0425688	81	0.454733	0.177173	0.316984	0.315405	MMRN1	0.303647	0.0490128	81	0.0964158	0.107156	0.138727	0.400063																	MYH11	-0.190263	0.0474639	81	1.59034	1.42907	1.41884	1.40008	CCN2	0.284879	0.0402059	81	0.367553	0.641498	0.523624	0.652432
81	PRANCR	-0.137794	0.0438195	82	0.295768	0.236347	0.188917	0.157975	ITGA2	0.303003	0.0489478	82	0.163548	0.397139	0.355984	0.466551																									IGF1	0.283575	0.0407611	82	0.0791035	0.137234	0.157837	0.362678
82	ATP6V0D2	-0.137015	0.0442017	83	0.222957	0.119843	0.244581	0.0859414	SLC24A2	0.301755	0.0493909	83	0.0539515	0.108219	0.0685922	0.355706																									BPIFB1	0.282035	0.0415174	83	0.101596	0.290803	0.429769	0.383631
83	AC114689.3	-0.135072	0.0459865	84	0.329494	0.23876	0.2149	0.194422	AC117453.1	0.301353	0.0491358	84	0.0904527	0.116789	0.19061	0.391805																									SLC16A10	0.281048	0.0418295	84	0.147619	0.391858	0.288013	0.428667
84	ACACA	-0.134247	0.0464449	85	0.359517	0.319229	0.308578	0.22527	MMP7	0.300644	0.0491413	85	0.0664466	0.091011	0.0860871	0.36709																									CAP2	0.280387	0.0418785	85	0.111075	0.187849	0.190328	0.391463
85	FAM184A	-0.133853	0.0463822	86	0.284187	0.276305	0.287795	0.150334	TRIM5	0.299463	0.0495434	86	0.0947013	0.0948496	0.0988504	0.394164																									FGF7	0.279922	0.0417707	86	0.118793	0.140352	0.241766	0.398716
86	FENDRR	-0.131228	0.0490971	87	0.598245	0.999817	0.810393	0.467017	ADAMTSL2	0.298229	0.0499955	87	0.334939	0.345437	0.484399	0.633168																									CHSY3	0.275009	0.0454289	87	0.204723	0.338367	0.256323	0.479732
87	LRP2	-0.130783	0.0491016	88	0.251424	0.107892	0.268349	0.120641																																	TENM3	0.274928	0.044983	88	0.0833835	0.22883	0.208875	0.358311
88	PLCH1	-0.130425	0.0489999	89	0.282677	0.295935	0.310333	0.152251																																	FBXO32	0.274754	0.0446262	89	0.170316	0.266618	0.210367	0.44507
89	FMO5	-0.1288	0.0499659	90	0.329383	0.089165	0.101838	0.200583																																	COL6A3	0.273354	0.045333	90	0.411906	0.42142	0.564486	0.68526
90																																									ITGA2	0.273098	0.0450555	91	0.127571	0.259788	0.294127	0.400669
91																																									SESN3	0.27247	0.0451033	92	0.137746	0.206777	0.235673	0.410216
92																																									IGFBP5	0.271632	0.0453371	93	0.169615	0.175811	0.196291	0.441247
93																																									SERPINE1	0.271154	0.0452638	94	0.115705	0.442376	0.271389	0.386859
94																																									COMP	0.266961	0.0484705	95	0.00910071	0.0651449	0.0957188	0.276062
95																																									ANK2	0.264937	0.0498094	96	0.116783	0.382359	0.256981	0.38172
96
97
98
99
100
101
102
103
104
105
106
107
108
109
110
111
112
113
114
115
116
117
118
119
120
121
122
123
124
125
126
127
128
129
130
131
132
133
134
135
136
137
138
139
140
141
142
143
144
145
146
147
148
149
150
151
152
153
154
155
156
157
158
159
160
161
162
163
164
165
166
167
168
169
170
171
172
173
174
175
176
177
178
179
180
181
182
183
184
185
186
187
188
189
190
191
192
193
194
195
196
197
198
199
200
201
202
203
204
205
206
207
208
209
210
211
212
213
214
215
216
217
218
219
220
221
222
223
224
225
226
227
228
229
230
231
232
233
234
235
236
[truncated: 111 more columns]
