# Supplementary material for: Unagi: Deep Generative Model for Deciphering Cellular Dynamics and In-Silico Drug Discovery in Complex Diseases
Source: Research Square preprint supplement (doi:10.21203/rs.3.rs-3676579/v1), 2023-12-18
Supplement: Supplementary file 2 [file 6445ac9db6c5c53683ad2fce.xlsx]

## Sheet: overall_drug_perturbations
Perturbation results are based on all tracks, ranked by perturbation score. The adjusted p-value is derived from the perturbation results of a thousand 2-random gene combinations, serving as the background. "Drug_regulation" refers to the direction of gene regulation by compounds/drugs from the CMAP database. "Idrem_suggestion" indicates the direction of gene regulation that could inhibit IPF pro…
	compound	perturbation score	pval_adjusted	drug_regulation	idrem_suggestion
0	apicidin;belinostat;NCH-51;SB-939	0.502163	4.5509e-105	['HDAC9:+']	['HDAC9:+']
1	pinacidil	0.467754	7.4981e-90	['ABCC9:+', 'ABCC8:+']	['ABCC9:-', 'ABCC8:+']
2	glipizide;gliquidone;chlorpropamide;gliclazide;tolbutamide;glimepiride;mitiglinide;nateglinide;repaglinide	0.464572	1.6858e-88	['ABCC8:+']	['ABCC8:+']
3	glibenclamide	0.460493	8.7642e-87	['CFTR:+', 'ABCC8:-']	['CFTR:+', 'ABCC8:+']
4	clozapine	0.415253	5.8819e-69	['CHRM2:-', 'CHRM3:-', 'ADRA1A:-', 'HRH1:+']	['CHRM2:+', 'CHRM3:+', 'ADRA1A:+', 'HRH1:-']
5	niguldipine	0.384222	6.15969e-58	['ADRA1A:-', 'CACNA1C:-']	['ADRA1A:+', 'CACNA1C:-']
6	amlodipine;cleviprex;isradipine;nifedipine;nilvadipine;nisoldipine;nitrendipine;verapamil	0.38344	1.15205e-57	['CACNA1C:+', 'CACNA1D:+']	['CACNA1C:-', 'CACNA1D:+']
7	topiramate	0.320336	2.4114e-38	['GABRB2:-', 'GABRG3:-', 'GRIA1:+', 'SCN1A:-']	['GABRB2:-', 'GABRG3:-', 'GRIA1:+', 'SCN1A:+']
8	epinephrine;buflomedil;droxidopa;cabergoline;3-MPPI;anisodamine;cirazoline;dipivefrine;etilefrine;methoxamine;midodrine;oxymetazoline;phenylephrine;synephrine;spiperone;BMY-7378;2-PMDQ;alfuzosin;BE-2254;carvedilol;doxazosin;indoramin;labetalol;nicergoline;phentolamine;prazosin;RS-100329;RS-17053;tamsulosin;terazosin;WB-4101	0.313986	1.28195e-36	['ADRA1A:-']	['ADRA1A:+']
9	8-bromo-cGMP	0.309921	1.56197e-35	['PRKG1:+']	['PRKG1:+']
10	apremilast;cilomilast;dyphylline;piclamilast;Ro-20-1724;roflumilast;rolipram;zardaverine;doxofylline	0.308232	4.40743e-35	['PDE4D:-']	['PDE4D:+']
11	ibudilast	0.305387	2.46485e-34	['PDE10A:-', 'PDE3A:-', 'PDE4D:+']	['PDE10A:-', 'PDE3A:-', 'PDE4D:+']
12	felodipine;nimodipine	0.290563	1.32262e-30	['NR3C2:+', 'CACNA1C:-', 'CACNA1D:-']	['NR3C2:+', 'CACNA1C:-', 'CACNA1D:+']
13	eliprodil;ifenprodil;Ro-04-5595;traxoprodil;Ro-25-6981;CO-101244	0.244054	2.27596e-20	['GRIN2B:+']	['GRIN2B:+']
14	aminocaproic-acid	0.242774	4.12486e-20	['PLAT:+']	['PLAT:+']
15	benzamil	0.242745	4.25724e-20	['SCNN1B:-', 'SCNN1G:+', 'SLC8A1:-']	['SCNN1B:-', 'SCNN1G:-', 'SLC8A1:+']
16	risperidone;mianserin	0.241038	9.30018e-20	['ADRA1A:-', 'HRH1:-']	['ADRA1A:+', 'HRH1:-']
17	ampalex;aniracetam;GYKI-52466;mibampator;CNQX;NBQX;perampanel;SYM-2206	0.240445	1.23371e-19	['GRIA1:+']	['GRIA1:+']
18	CGP-37157;KB-R7943	0.236205	8.07796e-19	['SLC8A1:-']	['SLC8A1:+']
19	afatinib;BMS-599626;canertinib;dacomitinib;neratinib	0.232007	4.98641e-18	['EGFR:-', 'ERBB4:-']	['EGFR:+', 'ERBB4:+']
20	NMDA;dizocilpine;felbamate;L-701324	0.226789	4.50149e-17	['GRIN2A:+', 'GRIN2B:+']	['GRIN2A:-', 'GRIN2B:+']
21	mesalazine;indometacin	0.213068	1.04865e-14	['PPARG:+', 'PTGS2:-']	['PPARG:+', 'PTGS2:-']
22	estramustine-phosphate	0.208019	7.07488e-14	['ESR2:+', 'MAP2:-']	['ESR2:-', 'MAP2:+']
23	2-iminobiotin;myricitrin;proadifen	0.204515	2.5885e-13	['NOS1:+']	['NOS1:+']
24	1-monopalmitin;dofequidar;erythromycin-ethylsuccinate;elacridar;tariquidar;valspodar;zosuquidar;erythromycin-estolate	0.199046	1.82996e-12	['ABCB1:-']	['ABCB1:-']
25	cabozantinib	0.195958	5.40745e-12	['KDR:+', 'KIT:+', 'MET:+', 'TEK:-']	['KDR:+', 'KIT:-', 'MET:-', 'TEK:+']
26	nTZDpa;BADGE;balaglitazone;GW-1929;pioglitazone;rosiglitazone;tesaglitazar;troglitazone;bezafibrate;BRD-K14609189;ciglitazone;efatutazone;HO-013;eicosatetraynoic-acid;GW-9662;mifobate;T-0070907;bisphenol-a;telmisartan	0.191984	2.09919e-11	['PPARG:-']	['PPARG:+']
27	benidipine;diltiazem;lacidipine;manidipine;nicardipine;pranidipine;BAY-K8644;FPL-64176;ibutilide;mibefradil;pinaverium;otilonium	0.191433	2.57785e-11	['CACNA1C:+']	['CACNA1C:-']
28	doxapram	0.190111	4.07526e-11	['KCNK3:-']	['KCNK3:+']
29	W-13	0.166194	5.32716e-08	['MYLK:-', 'PDE1A:+']	['MYLK:+', 'PDE1A:-']
30	triflusal;papaverine;PF-02545920	0.141077	2.43226e-05	['PDE10A:-']	['PDE10A:-']
31	regorafenib	0.140793	2.6529e-05	['FGFR2:+', 'FLT1:+', 'FRK:+', 'KDR:+', 'KIT:+', 'TEK:+']	['FGFR2:-', 'FLT1:+', 'FRK:-', 'KDR:+', 'KIT:-', 'TEK:+']
32	PTB1;ursolic-acid;BRD-K86682249;BVT-948;dephostatin;lobaric-acid	0.140226	3.07424e-05	['PTPN1:-']	['PTPN1:-']
33	Z160;BRD-K56658166;cilnidipine;levetiracetam	0.138385	4.65322e-05	['CACNA1B:-']	['CACNA1B:-']
34	amitriptyline	0.137252	6.051e-05	['CHRM2:+', 'CHRM3:+', 'HRH1:-', 'SLC6A4:-']	['CHRM2:+', 'CHRM3:+', 'HRH1:-', 'SLC6A4:+']
35	amitifadine;clomipramine;nefazodone;venlafaxine;tramadol;desipramine;dosulepin;nortriptyline;protriptyline;trimipramine;amineptine;dexfenfluramine;vortioxetine;BTS-54505;mazindol;citalopram;desvenlafaxine;duloxetine;lofepramine;milnacipran;minaprine;sibutramine;trazodone;vilazodone;zimelidine;BRD-A41630653;alaproclate;sertraline;amoxapine;atomoxetine;tianeptine;escitalopram;fluoxetine;fluvoxamine…	0.134342	0.000112235	['SLC6A4:+']	['SLC6A4:+']
36	OSI-930	0.134058	0.000122363	['KDR:+', 'KIT:+']	['KDR:+', 'KIT:-']
37	guggulsterone;eplerenone;RU-28318;progesterone;fludrocortisone-acetate;desoxycortone;canrenone;drospirenone;potassium-canrenoate;spironolactone	0.130623	0.000246259	['NR3C2:+']	['NR3C2:+']
38	dipyridamole	0.127045	0.000495926	['PDE10A:-', 'PDE7B:-']	['PDE10A:-', 'PDE7B:-']
39	KD-023	0.12159	0.00134383	['ACACA:-']	['ACACA:+']
40	ODQ;YC-1;LY-83583	0.121392	0.00143796	['GUCY1A2:-']	['GUCY1A2:+']
41	gabapentin	0.120355	0.00177477	['CACNA1B:-', 'CACNA2D2:+']	['CACNA1B:-', 'CACNA2D2:+']
42	probucol	0.118214	0.00262374	['ABCA1:+']	['ABCA1:+']
43	calmidazolium;vinpocetine;propentofylline	0.114136	0.00520557	['PDE1A:+']	['PDE1A:-']
44	dovitinib	0.113591	0.0058868	['EGFR:-', 'FGFR2:+', 'FLT1:+', 'KDR:+', 'KIT:+']	['EGFR:+', 'FGFR2:-', 'FLT1:+', 'KDR:+', 'KIT:-']
45	ABT-702	0.112402	0.0073453	['ADK:-']	['ADK:+']
46	eszopiclone;propofol;temazepam;etomidate;metharbital;pentobarbital;butalbital;primidone;alprazolam;chlordiazepoxide;diazepam;lorazepam;enflurane;methoxyflurane;flumazenil;clonazepam	0.112172	0.00793418	['GABRB2:+', 'GABRG3:+']	['GABRB2:-', 'GABRG3:-']
47	TG-100801;ZM-306416;brivanib;nintedanib;axitinib;linifanib	0.11021	0.0110866	['FLT1:+', 'KDR:+']	['FLT1:+', 'KDR:+']
48	apocynin	0.105932	0.0212415	['NOX4:-']	['NOX4:-']
49	BCI-hydrochloride	0.104834	0.0258791	['DUSP6:-']	['DUSP6:+']
50	lucitanib	0.103334	0.0332344	['FGFR2:+', 'FLT1:+', 'KDR:+']	['FGFR2:-', 'FLT1:+', 'KDR:+']
51	quetiapine;antazoline;homochlorcyclizine;hydroxyzine;cinnarizine;diphenylpyraline;alimemazine;ketotifen;betahistine;histamine;aripiprazole;asenapine;loxapine;olanzapine;ziprasidone;cyclizine;acrivastine;astemizole;azelastine;bepotastine;brompheniramine;carbinoxamine;cetirizine;chlorcyclizine;chloropyramine;clemastine;cyproheptadine;deptropine;desloratadine;dexbrompheniramine;dimenhydrinate;diphen…	0.0999325	0.0540926	['HRH1:-']	['HRH1:-']
52	NS-1619;paxilline;penitrem-a;BMS-191011	0.0990623	0.0637335	['KCNMA1:+']	['KCNMA1:-']
53	dalfampridine	0.0989016	0.0690544	['KCND2:-', 'KCNB2:-']	['KCND2:-', 'KCNB2:-']
54	imipramine	0.0953372	0.112089	['CHRM2:-', 'SLC6A4:+']	['CHRM2:+', 'SLC6A4:+']
55	bindarit	0.0928505	0.158455	['CCL2:-']	['CCL2:-']
56	BMS-927711;MK-3207;telcagepant	0.090401	0.221432	['CALCRL:+']	['CALCRL:+']
57	MK-2461	0.0870096	0.337178	['FGFR2:+', 'FLT1:+', 'MET:-']	['FGFR2:-', 'FLT1:+', 'MET:-']
58	amuvatinib	0.0864304	0.38894	['KIT:-', 'MET:-']	['KIT:-', 'MET:-']
59	oxindole-I;KI-8751;telatinib;ENMD-2076;SU-4312;ZM-323881;SU-11652	0.0860177	0.445007	['KDR:+']	['KDR:+']
60	ambrisentan;bosentan;IRL-2500;macitentan	0.0853925	0.524488	['EDNRB:-']	['EDNRB:+']
61	marimastat	0.0818576	0.811529	['MMP1:+', 'MMP7:-']	['MMP1:-', 'MMP7:-']
62	dorsomorphin	0.0814367	0.961751	['BMPR1B:+']	['BMPR1B:-']
63	DY-131	0.0813585	1	['ESR2:+', 'ESRRG:+']	['ESR2:-', 'ESRRG:-']
64	orantinib	0.0805959	1	['FGFR2:-', 'KDR:-']	['FGFR2:-', 'KDR:+']
65	tyrphostin-47;alvocidib;WHI-P154;CGP-53353;AG-494;ARRY-334543;AST-1306;BIBU-1361;BIBX-1382;bis-tyrphostin;CGP-52411;chrysophanic-acid;erbstatin-analog;erlotinib;gefitinib;GW-583340;lapatinib;lavendustin-c;LFM-A12;PD-158780;pelitinib;RG-14620;rociletinib;WZ-3146;WZ-4002;angiogenesis-inhibitor;AG-957;malonoben;AV-412	0.0805806	1	['EGFR:-']	['EGFR:+']
66	oleamide;varespladib	0.0794584	1	['PLA2G2A:-']	['PLA2G2A:-']
67	GANT-61	0.0771205	1	['GLI2:+']	['GLI2:-']
68	genistein	0.0761251	1	['CFTR:-', 'ESR2:-']	['CFTR:+', 'ESR2:-']

## Sheet: track4_drug_perturbations - S4_
Perturbation results based on the FibAlv-4 track, ranked by perturbation score. The adjusted p-value uses the perturbation results of a thousand 2-random gene combinations as the background. Target_genes refer to the genes regulated by the compounds/drugs. Idrem_suggestion refers to the direction of gene regulation that could inhibit IPF progression based on IDREM results. For example, if gene A'…
	compound	perturbation score	pval_adjusted	drug_regulation	idrem_suggestion
0	apicidin;belinostat;NCH-51;SB-939	0.502163	4.62855e-225	['HDAC9:+']	['HDAC9:+']
1	pinacidil	0.467754	1.41455e-193	['ABCC9:+', 'ABCC8:+']	['ABCC9:-', 'ABCC8:+']
2	glipizide;gliquidone;chlorpropamide;gliclazide;tolbutamide;glimepiride;mitiglinide;nateglinide;repaglinide	0.464572	8.81628e-191	['ABCC8:+']	['ABCC8:+']
3	glibenclamide	0.460493	3.13496e-187	['CFTR:+', 'ABCC8:-']	['CFTR:+', 'ABCC8:+']
4	clozapine	0.415253	0.0000000000000000000000000000000000000000000000000000000000000000000000000000000000000000000000000000000000000000000000000000000000000000000000000000038557224119520843739542198147742903348869817304351024509419875457275240252330054069759221146238386208433645078157180084840509588594689722744152831687209023018708573209732838539102794133686134318377822595006546114725591826395670516791685809734562575…	['CHRM2:-', 'CHRM3:-', 'ADRA1A:-', 'HRH1:+']	['CHRM2:+', 'CHRM3:+', 'ADRA1A:+', 'HRH1:-']
5	niguldipine	0.384222	0.0000000000000000000000000000000000000000000000000000000000000000000000000000000000000000000000000000000000000000000000000000004327578498581583712156699636551112712234233643417749356567071541312203696994242478261603354594003039892191127180834873331336660189178407515093005235031492474945366296779765705599437006249388229637561179535933065187634378957269347237770466853858385924437743033331648701442…	['ADRA1A:-', 'CACNA1C:-']	['ADRA1A:+', 'CACNA1C:-']
6	amlodipine;cleviprex;isradipine;nifedipine;nilvadipine;nisoldipine;nitrendipine;verapamil	0.38344	0.0000000000000000000000000000000000000000000000000000000000000000000000000000000000000000000000000000000000000000000000000000015735457572681729328442240751386592955358064194660946650612410599778233777334653449725662556270506948311721334750306990489993866965565386179432397115648678446963366581089843031147978026332114209830187165051932545556404916916740845190812570335419563209315410547885732531937…	['CACNA1C:+', 'CACNA1D:+']	['CACNA1C:-', 'CACNA1D:+']
7	topiramate	0.320336	0.0000000000000000000000000000000000000000000000000000000000000000000000000000000000000931342350774230004421060529449184040065555922842155839212076577402853461976585360227412796362868029398084318308424071033542538115592912010219513241854210009793487486199146208054162190139153417591474129742035771635788433774491825009211446352452188078409824917224825147366508001108055170781059137380470439336006722…	['GABRB2:-', 'GABRG3:-', 'GRIA1:+', 'SCN1A:-']	['GABRB2:-', 'GABRG3:-', 'GRIA1:+', 'SCN1A:+']
8	epinephrine;buflomedil;droxidopa;cabergoline;3-MPPI;anisodamine;cirazoline;dipivefrine;etilefrine;methoxamine;midodrine;oxymetazoline;phenylephrine;synephrine;spiperone;BMY-7378;2-PMDQ;alfuzosin;BE-2254;carvedilol;doxazosin;indoramin;labetalol;nicergoline;phentolamine;prazosin;RS-100329;RS-17053;tamsulosin;terazosin;WB-4101	0.313986	0.0000000000000000000000000000000000000000000000000000000000000000000000000000000004273628448705331434102320213055295285358794457433115985050752985552882621154785382609409059336484454062618088918511864130588250824670588550724805195310379963605860703173478532889120221798110202462798663190815034586733836544612398101581471625382997466777141342240753581697735770350516082867188463942987497722260152124…	['ADRA1A:-']	['ADRA1A:+']
9	8-bromo-cGMP	0.309921	0.0000000000000000000000000000000000000000000000000000000000000000000000000000000858932951778212035452425611702326882787416314387104830647965203678402661879324744152070670309253876880884420856665299172766414460044590930026925705999759595307559900881636757624310940583723102987886538080160730236873464101552020514265746227303835306291069647996719028482952760359178882549746467448612083668824056231804…	['PRKG1:+']	['PRKG1:+']
10	apremilast;cilomilast;dyphylline;piclamilast;Ro-20-1724;roflumilast;rolipram;zardaverine;doxofylline	0.308232	0.0000000000000000000000000000000000000000000000000000000000000000000000000000007653783098247231617833642896566665585921122357343127736580126771501299508787460221938018988597766079644295455282919203323067320099553482763160631837200479841585184754069518637669799018860887963661986859333828677935243621359280525566333487758486912709559688094305649034551912631851467069650105011104866694442147349805349…	['PDE4D:-']	['PDE4D:+']
11	ibudilast	0.305387	0.0000000000000000000000000000000000000000000000000000000000000000000000000000293881440950774569412577444896361219323928764307188653282113169837451532993381610891402291029360575946678849370744220906535588091591412494741164493558615443226575098331991926591611998079286666539786689896313520737561193019112877672833621380137263193476909845224630400869499036792613855840446300138884525418253940977780612…	['PDE10A:-', 'PDE3A:-', 'PDE4D:+']	['PDE10A:-', 'PDE3A:-', 'PDE4D:+']
12	felodipine;nimodipine	0.290563	0.0000000000000000000000000000000000000000000000000000000000000000000027311012350870257049427962020921545786432354291790197293904574963924632104510896481132440958619353164742631111042710564380258119164712179277747212879555092923893970195091958140088074479527591321204318164649010918726193923610704459431411991151363412558849790057997427503480771706710183682295946626038312500294208991342373296052490…	['NR3C2:+', 'CACNA1C:-', 'CACNA1D:-']	['NR3C2:+', 'CACNA1C:-', 'CACNA1D:+']
13	eliprodil;ifenprodil;Ro-04-5595;traxoprodil;Ro-25-6981;CO-101244	0.244054	3.5601e-47	['GRIN2B:+']	['GRIN2B:+']
14	aminocaproic-acid	0.242774	1.26827e-46	['PLAT:+']	['PLAT:+']
15	benzamil	0.242745	1.32048e-46	['SCNN1B:-', 'SCNN1G:+', 'SLC8A1:-']	['SCNN1B:-', 'SCNN1G:-', 'SLC8A1:+']
16	risperidone;mianserin	0.241038	7.07317e-46	['ADRA1A:-', 'HRH1:-']	['ADRA1A:+', 'HRH1:-']
17	ampalex;aniracetam;GYKI-52466;mibampator;CNQX;NBQX;perampanel;SYM-2206	0.240445	1.27332e-45	['GRIA1:+']	['GRIA1:+']
18	CGP-37157;KB-R7943	0.236205	7.55191e-44	['SLC8A1:-']	['SLC8A1:+']
19	afatinib;BMS-599626;canertinib;dacomitinib;neratinib	0.232007	3.96689e-42	['EGFR:-', 'ERBB4:-']	['EGFR:+', 'ERBB4:+']
20	NMDA;dizocilpine;felbamate;L-701324	0.226789	4.85031e-40	['GRIN2A:+', 'GRIN2B:+']	['GRIN2A:-', 'GRIN2B:+']
21	mesalazine;indometacin	0.213068	8.03013e-35	['PPARG:+', 'PTGS2:-']	['PPARG:+', 'PTGS2:-']
22	estramustine-phosphate	0.208019	5.41145e-33	['ESR2:+', 'MAP2:-']	['ESR2:-', 'MAP2:+']
23	2-iminobiotin;myricitrin;proadifen	0.204515	9.42094e-32	['NOS1:+']	['NOS1:+']
24	1-monopalmitin;dofequidar;erythromycin-ethylsuccinate;elacridar;tariquidar;valspodar;zosuquidar;erythromycin-estolate	0.199046	7.21444e-30	['ABCB1:-']	['ABCB1:-']
25	cabozantinib	0.195958	7.90173e-29	['KDR:+', 'KIT:+', 'MET:+', 'TEK:-']	['KDR:+', 'KIT:-', 'MET:-', 'TEK:+']
26	nTZDpa;BADGE;balaglitazone;GW-1929;pioglitazone;rosiglitazone;tesaglitazar;troglitazone;bezafibrate;BRD-K14609189;ciglitazone;efatutazone;HO-013;eicosatetraynoic-acid;GW-9662;mifobate;T-0070907;bisphenol-a;telmisartan	0.191984	1.60773e-27	['PPARG:-']	['PPARG:+']
27	benidipine;diltiazem;lacidipine;manidipine;nicardipine;pranidipine;BAY-K8644;FPL-64176;ibutilide;mibefradil;pinaverium;otilonium	0.191433	2.45464e-27	['CACNA1C:+']	['CACNA1C:-']
28	doxapram	0.190111	6.61954e-27	['KCNK3:-']	['KCNK3:+']
29	W-13	0.166194	8.1002e-20	['MYLK:-', 'PDE1A:+']	['MYLK:+', 'PDE1A:-']
30	triflusal;papaverine;PF-02545920	0.141077	1.31775e-13	['PDE10A:-']	['PDE10A:-']
31	regorafenib	0.140793	1.54517e-13	['FGFR2:+', 'FLT1:+', 'FRK:+', 'KDR:+', 'KIT:+', 'TEK:+']	['FGFR2:-', 'FLT1:+', 'FRK:-', 'KDR:+', 'KIT:-', 'TEK:+']
32	PTB1;ursolic-acid;BRD-K86682249;BVT-948;dephostatin;lobaric-acid	0.140226	2.09098e-13	['PTPN1:-']	['PTPN1:-']
33	Z160;BRD-K56658166;cilnidipine;levetiracetam	0.138385	5.35592e-13	['CACNA1B:-']	['CACNA1B:-']
34	amitriptyline	0.137252	9.53737e-13	['CHRM2:+', 'CHRM3:+', 'HRH1:-', 'SLC6A4:-']	['CHRM2:+', 'CHRM3:+', 'HRH1:-', 'SLC6A4:+']
35	amitifadine;clomipramine;nefazodone;venlafaxine;tramadol;desipramine;dosulepin;nortriptyline;protriptyline;trimipramine;amineptine;dexfenfluramine;vortioxetine;BTS-54505;mazindol;citalopram;desvenlafaxine;duloxetine;lofepramine;milnacipran;minaprine;sibutramine;trazodone;vilazodone;zimelidine;BRD-A41630653;alaproclate;sertraline;amoxapine;atomoxetine;tianeptine;escitalopram;fluoxetine;fluvoxamine…	0.134342	3.99275e-12	['SLC6A4:+']	['SLC6A4:+']
36	OSI-930	0.134058	4.64586e-12	['KDR:+', 'KIT:+']	['KDR:+', 'KIT:-']
37	guggulsterone;eplerenone;RU-28318;progesterone;fludrocortisone-acetate;desoxycortone;canrenone;drospirenone;potassium-canrenoate;spironolactone	0.130623	2.38123e-11	['NR3C2:+']	['NR3C2:+']
38	dipyridamole	0.127045	1.23289e-10	['PDE10A:-', 'PDE7B:-']	['PDE10A:-', 'PDE7B:-']
39	KD-023	0.12159	1.34118e-09	['ACACA:-']	['ACACA:+']
40	ODQ;YC-1;LY-83583	0.121392	1.48169e-09	['GUCY1A2:-']	['GUCY1A2:+']
41	gabapentin	0.120355	2.32544e-09	['CACNA1B:-', 'CACNA2D2:+']	['CACNA1B:-', 'CACNA2D2:+']
42	probucol	0.118214	5.70909e-09	['ABCA1:+']	['ABCA1:+']
43	calmidazolium;vinpocetine;propentofylline	0.114136	2.93808e-08	['PDE1A:+']	['PDE1A:-']
44	dovitinib	0.113591	3.6908e-08	['EGFR:-', 'FGFR2:+', 'FLT1:+', 'KDR:+', 'KIT:+']	['EGFR:+', 'FGFR2:-', 'FLT1:+', 'KDR:+', 'KIT:-']
45	ABT-702	0.112402	5.92374e-08	['ADK:-']	['ADK:+']
46	eszopiclone;propofol;temazepam;etomidate;metharbital;pentobarbital;butalbital;primidone;alprazolam;chlordiazepoxide;diazepam;lorazepam;enflurane;methoxyflurane;flumazenil;clonazepam	0.112172	6.58025e-08	['GABRB2:+', 'GABRG3:+']	['GABRB2:-', 'GABRG3:-']
47	TG-100801;ZM-306416;brivanib;nintedanib;axitinib;linifanib	0.11021	1.39837e-07	['FLT1:+', 'KDR:+']	['FLT1:+', 'KDR:+']
48	apocynin	0.105932	6.67171e-07	['NOX4:-']	['NOX4:-']
49	BCI-hydrochloride	0.104834	9.97281e-07	['DUSP6:-']	['DUSP6:+']
50	lucitanib	0.103334	1.70054e-06	['FGFR2:+', 'FLT1:+', 'KDR:+']	['FGFR2:-', 'FLT1:+', 'KDR:+']
51	quetiapine;antazoline;homochlorcyclizine;hydroxyzine;cinnarizine;diphenylpyraline;alimemazine;ketotifen;betahistine;histamine;aripiprazole;asenapine;loxapine;olanzapine;ziprasidone;cyclizine;acrivastine;astemizole;azelastine;bepotastine;brompheniramine;carbinoxamine;cetirizine;chlorcyclizine;chloropyramine;clemastine;cyproheptadine;deptropine;desloratadine;dexbrompheniramine;dimenhydrinate;diphen…	0.0999325	5.36324e-06	['HRH1:-']	['HRH1:-']
52	NS-1619;paxilline;penitrem-a;BMS-191011	0.0990623	7.2424e-06	['KCNMA1:+']	['KCNMA1:-']
53	dalfampridine	0.0989016	7.78036e-06	['KCND2:-', 'KCNB2:-']	['KCND2:-', 'KCNB2:-']
54	imipramine	0.0953372	2.4134e-05	['CHRM2:-', 'SLC6A4:+']	['CHRM2:+', 'SLC6A4:+']
55	bindarit	0.0928505	5.17519e-05	['CCL2:-']	['CCL2:-']
56	BMS-927711;MK-3207;telcagepant	0.090401	0.000106886	['CALCRL:+']	['CALCRL:+']
57	MK-2461	0.0870096	0.000277081	['FGFR2:+', 'FLT1:+', 'MET:-']	['FGFR2:-', 'FLT1:+', 'MET:-']
58	amuvatinib	0.0864304	0.000330501	['KIT:-', 'MET:-']	['KIT:-', 'MET:-']
59	oxindole-I;KI-8751;telatinib;ENMD-2076;SU-4312;ZM-323881;SU-11652	0.0860177	0.000377027	['KDR:+']	['KDR:+']
60	ambrisentan;bosentan;IRL-2500;macitentan	0.0853925	0.00045447	['EDNRB:-']	['EDNRB:+']
61	marimastat	0.0818576	0.0011346	['MMP1:+', 'MMP7:-']	['MMP1:-', 'MMP7:-']
62	dorsomorphin	0.0814367	0.0012884	['BMPR1B:+']	['BMPR1B:-']
63	DY-131	0.0813585	0.00134671	['ESR2:+', 'ESRRG:+']	['ESR2:-', 'ESRRG:-']
64	orantinib	0.0805959	0.00166026	['FGFR2:-', 'KDR:-']	['FGFR2:-', 'KDR:+']
65	tyrphostin-47;alvocidib;WHI-P154;CGP-53353;AG-494;ARRY-334543;AST-1306;BIBU-1361;BIBX-1382;bis-tyrphostin;CGP-52411;chrysophanic-acid;erbstatin-analog;erlotinib;gefitinib;GW-583340;lapatinib;lavendustin-c;LFM-A12;PD-158780;pelitinib;RG-14620;rociletinib;WZ-3146;WZ-4002;angiogenesis-inhibitor;AG-957;malonoben;AV-412	0.0805806	0.00171136	['EGFR:-']	['EGFR:+']
66	oleamide;varespladib	0.0794584	0.00229285	['PLA2G2A:-']	['PLA2G2A:-']
67	GANT-61	0.0771205	0.00402574	['GLI2:+']	['GLI2:-']
68	genistein	0.0761251	0.0051663	['CFTR:-', 'ESR2:-']	['CFTR:+', 'ESR2:-']
69	sunitinib;cediranib;lenvatinib;motesanib;pazopanib;sorafenib;vatalanib;HMN-214;semaxanib;tivozanib	0.0738042	0.00875381	['FLT1:+', 'KDR:+', 'KIT:-']	['FLT1:+', 'KDR:+', 'KIT:-']
70	vandetanib	0.0738029	0.00902983	['EGFR:-', 'FLT1:-', 'KDR:+', 'TEK:+']	['EGFR:+', 'FLT1:+', 'KDR:+', 'TEK:+']
71	phenytoin	0.0735686	0.00978852	['SCN1A:+', 'SCN2A:+']	['SCN1A:+', 'SCN2A:-']
72	NSC-405020	0.0733817	0.0105156	['MMP1:-']	['MMP1:-']
73	rebastinib	0.0729391	0.0119197	['KDR:+', 'TEK:+']	['KDR:+', 'TEK:+']
74	EI-247;GSK-1904529A;linsitinib	0.0727431	0.0128521	['INSR:+']	['INSR:-']
75	ataluren	0.0722367	0.0147764	['DMD:+']	['DMD:-']
76	furosemide;piretanide;bumetanide	0.0713757	0.0182408	['SLC12A2:-']	['SLC12A2:-']
77	pimobendan;amrinone;anagrelide;cilostamide;cilostazol;milrinone;olprinone;siguazodan;theophylline;aminophylline	0.070768	0.0213919	['PDE3A:+']	['PDE3A:-']
78	methscopolamine;ipratropium;aceclidine;pilocarpine;aclidinium;atropine;BRD-A93048969;darifenacin;glycopyrrolate;oxybutynin;scopolamine;solifenacin;solifenacin-succinate;tolterodine	0.0704375	0.0237716	['CHRM2:+', 'CHRM3:+']	['CHRM2:+', 'CHRM3:+']
79	ABT-737;BH3I-1;gossypol;navitoclax;TW-37;purpurogallin	0.068076	0.0388472	['BCL2L1:-']	['BCL2L1:-']
80	foretinib;golvatinib	0.0675619	0.0446393	['KDR:+', 'MET:-']	['KDR:+', 'MET:-']
81	BRL-54443;LY-344864;rizatriptan;sumatriptan;zolmitriptan;methysergide	0.0672559	0.0494457	['HTR1F:+']	['HTR1F:-']
82	inhibitor-BEC	0.0663055	0.0615763	['ARG2:-']	['ARG2:+']
83	lamotrigine	0.0647317	0.0852651	['SCN1A:+', 'SCN2A:-', 'SCN3A:+']	['SCN1A:+', 'SCN2A:-', 'SCN3A:-']
84	CFTRinh-172;ivacaftor;glafenine	0.0618576	0.144603	['CFTR:+']	['CFTR:+']
85	doxepin	0.0608381	0.179676	['HRH1:+', 'SLC6A4:+']	['HRH1:-', 'SLC6A4:+']
86	BRD-K19059335	0.0597202	0.226409	['RUNX1:-']	['RUNX1:-']
87	nimesulide;parecoxib	0.0578912	0.315766	['LTF:+', 'PTGS2:-']	['LTF:-', 'PTGS2:-']
88	ML-7	0.057234	0.371309	['MYLK:-']	['MYLK:+']
89	KI-16425	0.0555251	0.505205	['LPAR1:-', 'LPAR3:-']	['LPAR1:+', 'LPAR3:-']
90	AS-601245;pyrazolanthrone	0.0539546	0.671609	['MAPK10:-']	['MAPK10:-']
91	sotrastaurin	0.0535351	0.772572	['PRKCB:+', 'PRKCQ:-']	['PRKCB:-', 'PRKCQ:-']
92	SYM-2081	0.0532178	0.8842	['GRIK2:+']	['GRIK2:-']
93	zonisamide	0.0521697	1	['SCN1A:+', 'SCN2A:-', 'SCN3A:-', 'CA12:-']	['SCN1A:+', 'SCN2A:-', 'SCN3A:-', 'CA12:-']
94	imatinib;midostaurin;tandutinib;quizartinib;nilotinib	0.0508197	1	['KIT:-']	['KIT:-']
95	carbachol;oxotremorine-sesquifumarate;bethanechol;otenzepad;AQ-RA741;dicycloverine;SCH-202676	0.0505856	1	['CHRM2:+']	['CHRM2:+']
96	cyclophosphamide;ifosfamide;indinavir;ritonavir;dolutegravir;voriconazole;enilconazole;nevirapine;dapivirine	0.0493689	1	['CYP3A5:+']	['CYP3A5:+']
97	SANT-1;SANT-2	0.0492885	1	['SHH:-']	['SHH:-']
98	crizotinib;BMS-777607;MK-8033;PF-04217903;PHA-665752;MGCD-265;AMG-208;JNJ-38877605;SU-11274;tivantinib;EMD-1214063	0.049235	1	['MET:-']	['MET:-']
99	ON-01910	0.0492165	1	['FLT1:-']	['FLT1:+']
100	PKCbeta-inhibitor;enzastaurin;hispidin	0.0485392	1	['PRKCB:+']	['PRKCB:-']
101	dinoprost	0.0484455	1	['PTGER3:-', 'PTGFR:-']	['PTGER3:-', 'PTGFR:-']
