# Supplementary material for: Unagi: Deep Generative Model for Deciphering Cellular Dynamics and In-Silico Drug Discovery in Complex Diseases
Source: Research Square preprint supplement (doi:10.21203/rs.3.rs-3676579/v1), 2023-12-18
Supplement: Supplementary file 3 [file 87fdc59c0a39a2b2c784cf19.xlsx]

## Sheet: overall_pathway_perturabtions
Perturbation Results Based on All Tracks, Ranked by Perturbation Score: The adjusted p-value (pval_adjusted) is calculated using the perturbation results of a thousand 30-random gene combinations as the background. "Target_genes" are the genes regulated by the pathway. "Idrem_suggestion" refers to the direction of gene regulations that could inhibit IPF progression, as indicated by IDREM results.…
	Pathways	perturbation score	pval_adjusted	Target_genes	idrem_suggestion
0	REACTOME_NETRIN_1_SIGNALING	0.740815	2.43598e-21	['NTN1', 'PRKCQ', 'NTN4', 'EZR', 'TRPC4', 'TRPC6', 'SLIT2', 'UNC5D', 'ROBO1', 'DSCAML1', 'UNC5C', 'SLIT3', 'DCC']	['NTN1:-', 'PRKCQ:-', 'NTN4:+', 'EZR:-', 'TRPC4:-', 'TRPC6:+', 'SLIT2:+', 'UNC5D:+', 'ROBO1:-', 'DSCAML1:+', 'UNC5C:-', 'SLIT3:+', 'DCC:+']
1	KEGG_CARDIAC_MUSCLE_CONTRACTION	0.635431	1.73247e-14	['CACNB2', 'CACNB4', 'RYR2', 'CACNG6', 'TPM1', 'ATP1B1', 'CACNA2D3', 'CACNA1D', 'SLC8A1', 'CACNA1C', 'CACNA2D2', 'CACNG4']	['CACNB2:+', 'CACNB4:+', 'RYR2:-', 'CACNG6:-', 'TPM1:-', 'ATP1B1:-', 'CACNA2D3:+', 'CACNA1D:+', 'SLC8A1:+', 'CACNA1C:-', 'CACNA2D2:+', 'CACNG4:-']
2	REACTOME_REGULATION_OF_COMMISSURAL_AXON_PATHFINDING_BY_SLIT_AND_ROBO	0.63374	2.17744e-14	['NTN1', 'SLIT2', 'ROBO1', 'SLIT3', 'NELL2', 'ROBO2', 'DCC']	['NTN1:-', 'SLIT2:+', 'ROBO1:-', 'SLIT3:+', 'NELL2:-', 'ROBO2:+', 'DCC:+']
3	WP_HYPOTHESIZED_PATHWAYS_IN_PATHOGENESIS_OF_CARDIOVASCULAR_DISEASE	0.629755	3.70732e-14	['LTBP1', 'LTBP2', 'FBN2', 'FBN1', 'POSTN', 'SERPINE1', 'SMAD3', 'CCN2', 'ANGPT2', 'RUNX2']	['LTBP1:-', 'LTBP2:-', 'FBN2:-', 'FBN1:-', 'POSTN:-', 'SERPINE1:-', 'SMAD3:-', 'CCN2:-', 'ANGPT2:-', 'RUNX2:-']
4	REACTOME_NEURONAL_SYSTEM	0.629223	3.98742e-14	['ABCC8', 'CACNA2D2', 'NRXN3', 'RASGRF1', 'CAMK2B', 'SYT1', 'ABCC9', 'CACNG4', 'ADCY2', 'RIMS1', 'KCNN2', 'EPB41L3', 'ACHE', 'EPB41L1', 'NCALD', 'SLC1A1', 'APBA1', 'SLC6A4', 'SLC1A2', 'SYT10', 'LIN7A', 'RASGRF2', 'EPB41L5', 'GLS', 'GNGT1', 'SNAP25', 'KCNMB4', 'MDM2', 'KCNK1', 'GABBR2', 'PPFIA2', 'NTRK3', 'CACNA1A', 'KCNH1', 'GABRB2', 'NLGN4X', 'CACNA1B', 'GRIK4', 'DLG2', 'HOMER1', 'PTPRD', 'KCNJ1…	['ABCC8:+', 'CACNA2D2:+', 'NRXN3:+', 'RASGRF1:+', 'CAMK2B:-', 'SYT1:-', 'ABCC9:-', 'CACNG4:-', 'ADCY2:-', 'RIMS1:+', 'KCNN2:-', 'EPB41L3:+', 'ACHE:-', 'EPB41L1:-', 'NCALD:+', 'SLC1A1:-', 'APBA1:-', 'SLC6A4:+', 'SLC1A2:-', 'SYT10:-', 'LIN7A:+', 'RASGRF2:-', 'EPB41L5:+', 'GLS:+', 'GNGT1:-', 'SNAP25:-', 'KCNMB4:+', 'MDM2:-', 'KCNK1:-', 'GABBR2:-', 'PPFIA2:-', 'NTRK3:-', 'CACNA1A:-', 'KCNH1:-', 'GABR…
5	KEGG_CALCIUM_SIGNALING_PATHWAY	0.624582	7.35772e-14	['PTGFR', 'PTGER3', 'TACR1', 'SLC8A1', 'ITPR3', 'EDNRB', 'CHRM2', 'MYLK', 'CHRM3', 'ADCY2', 'PDE1C', 'GNA14', 'CAMK2B', 'ATP2B4', 'GRM5', 'ADCY8', 'PLCB1', 'PRKCB', 'RYR2', 'RYR3', 'PDE1A', 'ERBB4', 'CACNA1A', 'GRIN2A', 'CACNA1D', 'CACNA1E', 'CACNA1B', 'CACNA1C', 'NOS1', 'EGFR', 'ADRA1A', 'CD38', 'HRH1']	['PTGFR:-', 'PTGER3:-', 'TACR1:-', 'SLC8A1:+', 'ITPR3:+', 'EDNRB:+', 'CHRM2:+', 'MYLK:+', 'CHRM3:+', 'ADCY2:-', 'PDE1C:+', 'GNA14:+', 'CAMK2B:-', 'ATP2B4:-', 'GRM5:-', 'ADCY8:+', 'PLCB1:-', 'PRKCB:-', 'RYR2:-', 'RYR3:-', 'PDE1A:-', 'ERBB4:+', 'CACNA1A:-', 'GRIN2A:-', 'CACNA1D:+', 'CACNA1E:-', 'CACNA1B:-', 'CACNA1C:-', 'NOS1:+', 'EGFR:+', 'ADRA1A:+', 'CD38:-', 'HRH1:-']
6	REACTOME_INTEGRATION_OF_ENERGY_METABOLISM	0.609456	5.15285e-13	['ABCC8', 'CACNA2D2', 'ACSL4', 'ADCY2', 'ITPR3', 'GNGT1', 'SNAP25', 'CHRM3', 'CD36', 'CACNA1A', 'CACNA1C', 'ADCY8', 'GNA14', 'CACNA1D', 'CACNB2', 'KCNS3', 'ADCY5', 'PLCB1', 'CACNA1E', 'ACACA']	['ABCC8:+', 'CACNA2D2:+', 'ACSL4:-', 'ADCY2:-', 'ITPR3:+', 'GNGT1:-', 'SNAP25:-', 'CHRM3:+', 'CD36:+', 'CACNA1A:-', 'CACNA1C:-', 'ADCY8:+', 'GNA14:+', 'CACNA1D:+', 'CACNB2:+', 'KCNS3:-', 'ADCY5:-', 'PLCB1:-', 'CACNA1E:-', 'ACACA:+']
7	REACTOME_SIGNALING_BY_ROBO_RECEPTORS	0.60105	1.47748e-12	['NTN1', 'PAK3', 'PAK5', 'CXCL12', 'CAP2', 'FLRT3', 'SLIT2', 'ROBO1', 'SLIT3', 'NELL2', 'ROBO2', 'DCC', 'SRGAP3']	['NTN1:-', 'PAK3:-', 'PAK5:+', 'CXCL12:-', 'CAP2:-', 'FLRT3:+', 'SLIT2:+', 'ROBO1:-', 'SLIT3:+', 'NELL2:-', 'ROBO2:+', 'DCC:+', 'SRGAP3:-']
8	REACTOME_REGULATION_OF_INSULIN_SECRETION	0.599283	1.84267e-12	['ABCC8', 'CACNA2D2', 'ACSL4', 'ITPR3', 'GNGT1', 'SNAP25', 'CHRM3', 'CD36', 'CACNA1A', 'CACNA1C', 'ADCY8', 'GNA14', 'CACNA1D', 'CACNB2', 'KCNS3', 'ADCY5', 'PLCB1', 'CACNA1E']	['ABCC8:+', 'CACNA2D2:+', 'ACSL4:-', 'ITPR3:+', 'GNGT1:-', 'SNAP25:-', 'CHRM3:+', 'CD36:+', 'CACNA1A:-', 'CACNA1C:-', 'ADCY8:+', 'GNA14:+', 'CACNA1D:+', 'CACNB2:+', 'KCNS3:-', 'ADCY5:-', 'PLCB1:-', 'CACNA1E:-']
9	REACTOME_SIGNALING_BY_RHO_GTPASES_MIRO_GTPASES_AND_RHOBTB3	0.598698	1.98536e-12	['CFTR', 'BAIAP2L1', 'ARHGAP44', 'RHOBTB2', 'ANLN', 'CDH1', 'ARHGAP6', 'MYLK', 'PRKCZ', 'PAK3', 'FAM135A', 'DOCK3', 'PAK5', 'MYH14', 'CAV1', 'RASGRF2', 'ARHGEF26', 'RND3', 'ARHGEF2', 'CENPF', 'FILIP1', 'WIPF3', 'CIT', 'AKAP12', 'MYH10', 'MYH11', 'RRAS2', 'FAM13A', 'DIAPH3', 'DOCK5', 'MPP7', 'KALRN', 'PTPN13', 'DLC1', 'ARHGAP12', 'ARHGAP42', 'PRKCB', 'RHOH', 'PCDH7', 'AKAP13', 'RND1', 'SCAI', 'MUC…	['CFTR:+', 'BAIAP2L1:-', 'ARHGAP44:+', 'RHOBTB2:-', 'ANLN:-', 'CDH1:-', 'ARHGAP6:+', 'MYLK:+', 'PRKCZ:+', 'PAK3:-', 'FAM135A:-', 'DOCK3:-', 'PAK5:+', 'MYH14:-', 'CAV1:-', 'RASGRF2:-', 'ARHGEF26:+', 'RND3:-', 'ARHGEF2:+', 'CENPF:-', 'FILIP1:+', 'WIPF3:-', 'CIT:-', 'AKAP12:+', 'MYH10:+', 'MYH11:-', 'RRAS2:+', 'FAM13A:-', 'DIAPH3:+', 'DOCK5:-', 'MPP7:-', 'KALRN:+', 'PTPN13:-', 'DLC1:+', 'ARHGAP12:+'…
10	REACTOME_ROLE_OF_ABL_IN_ROBO_SLIT_SIGNALING	0.586535	8.70015e-12	['CAP2', 'SLIT2', 'ROBO1']	['CAP2:-', 'SLIT2:+', 'ROBO1:-']
11	REACTOME_DISEASES_OF_SIGNAL_TRANSDUCTION_BY_GROWTH_FACTOR_RECEPTORS_AND_SECOND_MESSENGERS	0.583756	1.21442e-11	['MAMLD1', 'HDAC9', 'CAMK2B', 'FGFR2', 'FGF10', 'NOX4', 'MET', 'KANK1', 'AREG', 'VWF', 'DUSP16', 'FGF1', 'FN1', 'BCL11A', 'EREG', 'KDR', 'KLB', 'MDM2', 'LMO7', 'FGF2', 'EGF', 'DUSP6', 'ESR2', 'FGF7', 'KSR1', 'DUSP10', 'EGFR', 'CNKSR2', 'DKK2', 'NRG1', 'KIT', 'NRG2', 'SQSTM1', 'SHH', 'SMAD3', 'RBPJ', 'NRG4', 'BCL2L1', 'FGG', 'FGA', 'BTC', 'ERBB4', 'EPGN', 'NRG3', 'NCOR2', 'SPRED2', 'LYN']	['MAMLD1:-', 'HDAC9:+', 'CAMK2B:-', 'FGFR2:-', 'FGF10:+', 'NOX4:-', 'MET:-', 'KANK1:+', 'AREG:-', 'VWF:+', 'DUSP16:-', 'FGF1:-', 'FN1:-', 'BCL11A:-', 'EREG:-', 'KDR:+', 'KLB:+', 'MDM2:-', 'LMO7:+', 'FGF2:-', 'EGF:-', 'DUSP6:+', 'ESR2:-', 'FGF7:-', 'KSR1:-', 'DUSP10:-', 'EGFR:+', 'CNKSR2:-', 'DKK2:-', 'NRG1:-', 'KIT:-', 'NRG2:+', 'SQSTM1:+', 'SHH:-', 'SMAD3:-', 'RBPJ:-', 'NRG4:-', 'BCL2L1:-', 'FGG…
12	WP_ROBO4_AND_VEGF_SIGNALING_PATHWAYS_CROSSTALK	0.581682	1.55624e-11	['SLIT2', 'KDR']	['SLIT2:+', 'KDR:+']
13	REACTOME_INACTIVATION_OF_CDC42_AND_RAC1	0.574487	3.61975e-11	['SLIT2', 'ROBO1', 'SRGAP3']	['SLIT2:+', 'ROBO1:-', 'SRGAP3:-']
14	REACTOME_SENSORY_PERCEPTION	0.566967	8.60319e-11	['CACNA2D2', 'ANO2', 'PRKCQ', 'MYO3B', 'DHRS9', 'GPC4', 'KCNN2', 'LRP2', 'EPB41L3', 'EPB41L1', 'EZR', 'ITPR3', 'RIPOR2', 'CLIC5', 'SDC4', 'GNGT1', 'LDLR', 'APOE', 'SNAP25', 'SCN2A', 'GPC3', 'PCDH15', 'EPS8', 'SCN3A', 'KCNMA1', 'CACNA1D', 'CACNB2', 'SCNN1G', 'SCNN1B', 'GPC5', 'GPC6', 'PCLO', 'AKR1C1', 'ABCA4']	['CACNA2D2:+', 'ANO2:+', 'PRKCQ:-', 'MYO3B:-', 'DHRS9:-', 'GPC4:-', 'KCNN2:-', 'LRP2:+', 'EPB41L3:+', 'EPB41L1:-', 'EZR:-', 'ITPR3:+', 'RIPOR2:+', 'CLIC5:+', 'SDC4:-', 'GNGT1:-', 'LDLR:-', 'APOE:-', 'SNAP25:-', 'SCN2A:-', 'GPC3:+', 'PCDH15:+', 'EPS8:-', 'SCN3A:-', 'KCNMA1:-', 'CACNA1D:+', 'CACNB2:+', 'SCNN1G:-', 'SCNN1B:-', 'GPC5:-', 'GPC6:-', 'PCLO:+', 'AKR1C1:-', 'ABCA4:-']
15	PID_HDAC_CLASSI_PATHWAY	0.56423	1.17608e-10	['NCOR2', 'HDAC9', 'SMURF1', 'PPARG']	['NCOR2:-', 'HDAC9:+', 'SMURF1:-', 'PPARG:+']
16	PID_SYNDECAN_1_PATHWAY	0.555382	3.16438e-10	['COL6A3', 'MET', 'COL7A1', 'MMP1', 'COL11A1', 'COL1A2', 'COL5A2', 'COL4A3', 'COL12A1', 'COL10A1', 'COL5A1', 'COL3A1', 'COL4A4', 'COL14A1', 'COL8A1', 'MMP9', 'COL4A1', 'MMP7', 'COL15A1', 'COL1A1', 'COL17A1', 'COL4A6']	['COL6A3:-', 'MET:-', 'COL7A1:-', 'MMP1:-', 'COL11A1:-', 'COL1A2:-', 'COL5A2:-', 'COL4A3:+', 'COL12A1:-', 'COL10A1:-', 'COL5A1:-', 'COL3A1:-', 'COL4A4:+', 'COL14A1:-', 'COL8A1:-', 'MMP9:-', 'COL4A1:-', 'MMP7:-', 'COL15A1:-', 'COL1A1:-', 'COL17A1:-', 'COL4A6:-']
17	WP_OVERVIEW_OF_PROINFLAMMATORY_AND_PROFIBROTIC_MEDIATORS	0.553209	4.02835e-10	['CCL4', 'CCL2', 'CCL20', 'CCL19', 'CCL21', 'CCL23', 'CCL22', 'CXCL11', 'CX3CL1', 'AREG', 'CXCL12', 'CXCL14', 'IL1RN', 'IL6', 'CXCL1', 'IL18', 'SPP1', 'CSF3', 'CSF2', 'CXCL3', 'CXCL2', 'CXCL8', 'LIF', 'CXCL9', 'MMP1', 'MMP9', 'CXCL10']	['CCL4:-', 'CCL2:-', 'CCL20:-', 'CCL19:-', 'CCL21:-', 'CCL23:+', 'CCL22:-', 'CXCL11:-', 'CX3CL1:-', 'AREG:-', 'CXCL12:-', 'CXCL14:-', 'IL1RN:-', 'IL6:-', 'CXCL1:-', 'IL18:-', 'SPP1:-', 'CSF3:+', 'CSF2:+', 'CXCL3:-', 'CXCL2:-', 'CXCL8:-', 'LIF:-', 'CXCL9:+', 'MMP1:-', 'MMP9:-', 'CXCL10:-']
18	REACTOME_ION_CHANNEL_TRANSPORT	0.55178	4.72241e-10	['CLCA4', 'ANO2', 'NEDD4L', 'CAMK2B', 'ATP2B4', 'ATP2C2', 'ATP11A', 'ATP12A', 'TRPM3', 'NALCN', 'ATP10B', 'ATP8A1', 'ATP13A4', 'ANO1', 'ATP8A2', 'TRPC4', 'STOML3', 'UNC79', 'ANO3', 'TRPC6', 'CLCA2', 'BEST4', 'ATP1B1', 'ATP6V0D2', 'ANO4', 'SLC9C2', 'WNK2', 'SCNN1G', 'SCNN1B', 'ASPH', 'RYR2', 'RYR3', 'ATP10A']	['CLCA4:-', 'ANO2:+', 'NEDD4L:+', 'CAMK2B:-', 'ATP2B4:-', 'ATP2C2:+', 'ATP11A:+', 'ATP12A:-', 'TRPM3:-', 'NALCN:-', 'ATP10B:-', 'ATP8A1:+', 'ATP13A4:+', 'ANO1:+', 'ATP8A2:-', 'TRPC4:-', 'STOML3:-', 'UNC79:-', 'ANO3:-', 'TRPC6:+', 'CLCA2:-', 'BEST4:-', 'ATP1B1:-', 'ATP6V0D2:-', 'ANO4:-', 'SLC9C2:-', 'WNK2:-', 'SCNN1G:-', 'SCNN1B:-', 'ASPH:-', 'RYR2:-', 'RYR3:-', 'ATP10A:-']
19	WP_OLIGODENDROCYTE_SPECIFICATION_AND_DIFFERENTIATION_LEADING_TO_MYELIN_COMPONENTS_FOR_CNS	0.547252	7.73935e-10	['BMP2', 'CXCL2', 'FGF2', 'IGF1', 'SHH', 'LIF', 'SOX5', 'SOX9', 'SOX6', 'CXCL1', 'GLI2']	['BMP2:-', 'CXCL2:-', 'FGF2:-', 'IGF1:-', 'SHH:-', 'LIF:-', 'SOX5:+', 'SOX9:-', 'SOX6:-', 'CXCL1:-', 'GLI2:-']
20	WP_G_PROTEIN_SIGNALING_PATHWAYS	0.546935	8.02958e-10	['PDE4D', 'GNGT1', 'ADCY5', 'ADCY8', 'PDE1C', 'GNA14', 'AKAP12', 'AKAP6', 'PDE7B', 'AKAP13', 'PRKCB', 'PRKCZ', 'PRKCQ', 'PDE1A', 'ADCY2']	['PDE4D:+', 'GNGT1:-', 'ADCY5:-', 'ADCY8:+', 'PDE1C:+', 'GNA14:+', 'AKAP12:+', 'AKAP6:+', 'PDE7B:-', 'AKAP13:+', 'PRKCB:-', 'PRKCZ:+', 'PRKCQ:-', 'PDE1A:-', 'ADCY2:-']
21	REACTOME_ACTIVATION_OF_RAC1	0.545099	9.80739e-10	['PAK3', 'PAK5', 'SLIT2', 'ROBO1']	['PAK3:-', 'PAK5:+', 'SLIT2:+', 'ROBO1:-']
22	REACTOME_REGULATION_OF_EXPRESSION_OF_SLITS_AND_ROBOS	0.544574	1.04018e-09	['SLIT2', 'ROBO1', 'ROBO2']	['SLIT2:+', 'ROBO1:-', 'ROBO2:+']
23	PID_TGFBR_PATHWAY	0.540432	1.62091e-09	['NEDD4L', 'CAV1', 'SMURF1', 'TGFB2', 'CCN2', 'SMAD3', 'YAP1']	['NEDD4L:+', 'CAV1:-', 'SMURF1:-', 'TGFB2:+', 'CCN2:-', 'SMAD3:-', 'YAP1:+']
24	WP_SUDDEN_INFANT_DEATH_SYNDROME_SIDS_SUSCEPTIBILITY_PATHWAYS	0.536988	2.3361e-09	['TPH1', 'PPARGC1A', 'TACR1', 'SLC6A4', 'RYR2', 'ESR2', 'CHRM2', 'NTRK2', 'MAP2', 'IL1RN', 'MAOA', 'NGF', 'IL6', 'NOS1AP', 'CXCL8', 'HDAC9', 'VIPR2', 'BDNF', 'SNAP25']	['TPH1:-', 'PPARGC1A:+', 'TACR1:-', 'SLC6A4:+', 'RYR2:-', 'ESR2:-', 'CHRM2:+', 'NTRK2:+', 'MAP2:+', 'IL1RN:-', 'MAOA:+', 'NGF:+', 'IL6:-', 'NOS1AP:-', 'CXCL8:-', 'HDAC9:+', 'VIPR2:-', 'BDNF:+', 'SNAP25:-']
25	KEGG_TYPE_II_DIABETES_MELLITUS	0.529876	4.8998e-09	['CACNA1A', 'MAPK10', 'CACNA1D', 'CACNA1E', 'CACNA1B', 'CACNA1C', 'ABCC8', 'PRKCZ', 'INSR']	['CACNA1A:-', 'MAPK10:-', 'CACNA1D:+', 'CACNA1E:-', 'CACNA1B:-', 'CACNA1C:-', 'ABCC8:+', 'PRKCZ:+', 'INSR:-']
26	WP_NEUROINFLAMMATION_AND_GLUTAMATERGIC_SIGNALING	0.528358	5.73995e-09	['TGFB2', 'ADCY8', 'IGF1', 'NOS1', 'SLC1A2', 'SLC1A1', 'IL1R2', 'INSR', 'CAMK2B', 'SMAD3', 'GRIK4', 'GLS', 'IL1R1', 'PRKCB', 'GRIN2B', 'GRIN2A', 'NGF', 'IL6', 'GRM8', 'GRM7', 'GRM5', 'GRIA1', 'FGF2', 'LIF', 'PLCB1', 'GRIK2', 'BDNF']	['TGFB2:+', 'ADCY8:+', 'IGF1:-', 'NOS1:+', 'SLC1A2:-', 'SLC1A1:-', 'IL1R2:+', 'INSR:-', 'CAMK2B:-', 'SMAD3:-', 'GRIK4:+', 'GLS:+', 'IL1R1:-', 'PRKCB:-', 'GRIN2B:+', 'GRIN2A:-', 'NGF:+', 'IL6:-', 'GRM8:+', 'GRM7:-', 'GRM5:-', 'GRIA1:+', 'FGF2:-', 'LIF:-', 'PLCB1:-', 'GRIK2:-', 'BDNF:+']
27	REACTOME_CELL_CELL_JUNCTION_ORGANIZATION	0.526985	6.62154e-09	['CDH1', 'CDH3', 'CLDN18', 'CDH6', 'CLDN16', 'PATJ', 'CDH11', 'CDH13', 'SDK1', 'CDH8', 'CDH12', 'CLDN1', 'CDH2', 'CADM2', 'CDH4', 'CADM1', 'CLDN5']	['CDH1:-', 'CDH3:-', 'CLDN18:+', 'CDH6:-', 'CLDN16:-', 'PATJ:+', 'CDH11:-', 'CDH13:+', 'SDK1:+', 'CDH8:+', 'CDH12:+', 'CLDN1:-', 'CDH2:-', 'CADM2:+', 'CDH4:+', 'CADM1:+', 'CLDN5:-']
28	REACTOME_SIGNALING_BY_NOTCH1_PEST_DOMAIN_MUTANTS_IN_CANCER,REACTOME_NOTCH_HLH_TRANSCRIPTION_PATHWAY	0.523469	9.48222e-09	['MAMLD1', 'HDAC9', 'RBPJ', 'NCOR2']	['MAMLD1:-', 'HDAC9:+', 'RBPJ:-', 'NCOR2:-']
29	REACTOME_ADHERENS_JUNCTIONS_INTERACTIONS	0.521459	1.16367e-08	['CDH1', 'CDH3', 'CDH6', 'CDH11', 'CDH13', 'CDH8', 'CDH12', 'CDH2', 'CADM2', 'CDH4', 'CADM1']	['CDH1:-', 'CDH3:-', 'CDH6:-', 'CDH11:-', 'CDH13:+', 'CDH8:+', 'CDH12:+', 'CDH2:-', 'CADM2:+', 'CDH4:+', 'CADM1:+']
30	REACTOME_ION_HOMEOSTASIS	0.515557	2.0977e-08	['CAMK2B', 'ATP2B4', 'ABCC9', 'NOS1', 'ITPR3', 'ATP1B1', 'SLC8A1', 'ASPH', 'RYR2', 'RYR3']	['CAMK2B:-', 'ATP2B4:-', 'ABCC9:-', 'NOS1:+', 'ITPR3:+', 'ATP1B1:-', 'SLC8A1:+', 'ASPH:-', 'RYR2:-', 'RYR3:-']
31	REACTOME_G_ALPHA_Q_SIGNALLING_EVENTS	0.515358	2.14505e-08	['CASR', 'NPFFR2', 'DGKG', 'PRKCQ', 'MGLL', 'DGKD', 'EDN1', 'ITPR3', 'TACR1', 'RGS4', 'ADRA1A', 'PTGFR', 'RGS13', 'EDN2', 'F2RL3', 'GNGT1', 'NMUR2', 'CHRM3', 'GRP', 'ANXA1', 'EDNRB', 'DGKB', 'TRPC6', 'EGFR', 'GNA14', 'DGKI', 'KALRN', 'GRM5', 'LPAR3', 'RASGRP1', 'SAA1', 'PLCB1', 'GPR132', 'GPR39', 'HRH1', 'LPAR1', 'GRK5', 'CCL23']	['CASR:-', 'NPFFR2:+', 'DGKG:+', 'PRKCQ:-', 'MGLL:+', 'DGKD:-', 'EDN1:-', 'ITPR3:+', 'TACR1:-', 'RGS4:-', 'ADRA1A:+', 'PTGFR:-', 'RGS13:-', 'EDN2:-', 'F2RL3:-', 'GNGT1:-', 'NMUR2:+', 'CHRM3:+', 'GRP:-', 'ANXA1:-', 'EDNRB:+', 'DGKB:-', 'TRPC6:+', 'EGFR:+', 'GNA14:+', 'DGKI:-', 'KALRN:+', 'GRM5:-', 'LPAR3:-', 'RASGRP1:-', 'SAA1:-', 'PLCB1:-', 'GPR132:-', 'GPR39:-', 'HRH1:-', 'LPAR1:+', 'GRK5:+', 'C…
32	KEGG_ENDOCYTOSIS	0.515013	2.22525e-08	['GRK3', 'FLT1', 'MDM2', 'PIP5K1B', 'RAB11FIP1', 'SMURF1', 'RAB31', 'LDLR', 'NEDD4L', 'MET', 'SH3GL3', 'ERBB4', 'SH3GL2', 'FGFR2', 'KDR', 'KIT', 'PRKCZ', 'PSD3', 'EGFR', 'EGF', 'IL2RA', 'GRK5']	['GRK3:-', 'FLT1:+', 'MDM2:-', 'PIP5K1B:+', 'RAB11FIP1:+', 'SMURF1:-', 'RAB31:-', 'LDLR:-', 'NEDD4L:+', 'MET:-', 'SH3GL3:+', 'ERBB4:+', 'SH3GL2:+', 'FGFR2:-', 'KDR:+', 'KIT:-', 'PRKCZ:+', 'PSD3:-', 'EGFR:+', 'EGF:-', 'IL2RA:-', 'GRK5:+']
33	WP_CILIOPATHIES	0.51305	2.70487e-08	['CENPF', 'DYNC2H1', 'AK7', 'DNAI2', 'DNAI1', 'CCNO', 'HYDIN', 'EFHC1', 'CFAP53', 'PKHD1', 'DNAH11', 'TRAF3IP1', 'DRC1', 'GLI2', 'DNAH6', 'IFT57', 'RSPH1', 'RSPH9', 'DNAAF1', 'PKD1L1', 'NME9', 'RP1', 'DCDC2', 'CFAP52']	['CENPF:-', 'DYNC2H1:+', 'AK7:-', 'DNAI2:-', 'DNAI1:-', 'CCNO:-', 'HYDIN:-', 'EFHC1:-', 'CFAP53:-', 'PKHD1:-', 'DNAH11:-', 'TRAF3IP1:-', 'DRC1:-', 'GLI2:-', 'DNAH6:-', 'IFT57:-', 'RSPH1:-', 'RSPH9:-', 'DNAAF1:-', 'PKD1L1:-', 'NME9:-', 'RP1:-', 'DCDC2:+', 'CFAP52:-']
34	REACTOME_RHO_GTPASE_CYCLE	0.511657	3.1071e-08	['CFTR', 'BAIAP2L1', 'ARHGAP44', 'RHOBTB2', 'ANLN', 'ARHGAP6', 'PAK3', 'FAM135A', 'DOCK3', 'PAK5', 'CAV1', 'RASGRF2', 'ARHGEF26', 'RND3', 'ARHGEF2', 'FILIP1', 'WIPF3', 'CIT', 'AKAP12', 'RRAS2', 'FAM13A', 'DIAPH3', 'DOCK5', 'MPP7', 'KALRN', 'PTPN13', 'DLC1', 'ARHGAP12', 'ARHGAP42', 'RHOH', 'PCDH7', 'AKAP13', 'RND1', 'MUC13', 'BASP1', 'NHS', 'SRGAP3', 'MYO6', 'CCDC187', 'PRAG1']	['CFTR:+', 'BAIAP2L1:-', 'ARHGAP44:+', 'RHOBTB2:-', 'ANLN:-', 'ARHGAP6:+', 'PAK3:-', 'FAM135A:-', 'DOCK3:-', 'PAK5:+', 'CAV1:-', 'RASGRF2:-', 'ARHGEF26:+', 'RND3:-', 'ARHGEF2:+', 'FILIP1:+', 'WIPF3:-', 'CIT:-', 'AKAP12:+', 'RRAS2:+', 'FAM13A:-', 'DIAPH3:+', 'DOCK5:-', 'MPP7:-', 'KALRN:+', 'PTPN13:-', 'DLC1:+', 'ARHGAP12:+', 'ARHGAP42:-', 'RHOH:-', 'PCDH7:-', 'AKAP13:+', 'RND1:+', 'MUC13:-', 'BASP…
35	PID_GLYPICAN_1PATHWAY	0.511154	3.27211e-08	['BLK', 'NRG1', 'FGF2', 'PLA2G2A', 'TGFB2', 'LYN', 'SLIT2', 'FLT1']	['BLK:-', 'NRG1:-', 'FGF2:-', 'PLA2G2A:-', 'TGFB2:+', 'LYN:-', 'SLIT2:+', 'FLT1:+']
36	REACTOME_NEUREXINS_AND_NEUROLIGINS	0.510577	3.47006e-08	['NRXN3', 'SYT1', 'EPB41L3', 'EPB41L1', 'APBA1', 'SYT10', 'LIN7A', 'EPB41L5', 'NLGN4X', 'DLG2', 'HOMER1', 'SHANK2', 'NLGN4Y', 'GRM5', 'NLGN1', 'DLGAP1', 'LRRTM4', 'NRXN1', 'GRIN2A', 'DLGAP2', 'LRRTM3', 'GRIN2B']	['NRXN3:+', 'SYT1:-', 'EPB41L3:+', 'EPB41L1:-', 'APBA1:-', 'SYT10:-', 'LIN7A:+', 'EPB41L5:+', 'NLGN4X:-', 'DLG2:-', 'HOMER1:-', 'SHANK2:-', 'NLGN4Y:-', 'GRM5:-', 'NLGN1:-', 'DLGAP1:+', 'LRRTM4:+', 'NRXN1:-', 'GRIN2A:-', 'DLGAP2:-', 'LRRTM3:+', 'GRIN2B:+']
37	WP_ADIPOGENESIS	0.508279	4.34563e-08	['EPAS1', 'AHR', 'IGF1', 'PPARGC1A', 'BMP1', 'BMP2', 'EBF1', 'SERPINE1', 'SMAD3', 'CYP26B1', 'LPIN2', 'PTGIS', 'PRLR', 'IL6', 'KLF5', 'PPARG', 'SCD', 'MBNL1', 'SPOCK1', 'LIF', 'LIFR', 'NCOR2']	['EPAS1:+', 'AHR:-', 'IGF1:-', 'PPARGC1A:+', 'BMP1:-', 'BMP2:-', 'EBF1:-', 'SERPINE1:-', 'SMAD3:-', 'CYP26B1:-', 'LPIN2:+', 'PTGIS:-', 'PRLR:+', 'IL6:-', 'KLF5:-', 'PPARG:+', 'SCD:+', 'MBNL1:+', 'SPOCK1:-', 'LIF:-', 'LIFR:+', 'NCOR2:-']
38	PID_ERBB4_PATHWAY	0.5074	4.74255e-08	['LRIG1', 'MDM2', 'YAP1', 'NRG2', 'ERBB4', 'BTC', 'EREG', 'PRLR', 'NRG1', 'GRIN2B', 'NRG4', 'NRG3']	['LRIG1:-', 'MDM2:-', 'YAP1:+', 'NRG2:+', 'ERBB4:+', 'BTC:-', 'EREG:-', 'PRLR:+', 'NRG1:-', 'GRIN2B:+', 'NRG4:-', 'NRG3:+']
39	KEGG_LONG_TERM_POTENTIATION	0.506877	5.00047e-08	['GRM5', 'ADCY8', 'PLCB1', 'PRKCB', 'GRIN2A', 'GRIN2B', 'ITPR3', 'CACNA1C', 'GRIA1', 'CAMK2B']	['GRM5:-', 'ADCY8:+', 'PLCB1:-', 'PRKCB:-', 'GRIN2A:-', 'GRIN2B:+', 'ITPR3:+', 'CACNA1C:-', 'GRIA1:+', 'CAMK2B:-']
40	BIOCARTA_RANBP2_PATHWAY	0.505721	5.60183e-08	['HDAC9', 'MDM2']	['HDAC9:+', 'MDM2:-']
41	PID_AP1_PATHWAY	0.505448	5.76564e-08	['COL1A2', 'CCL2', 'PLAU', 'MMP9', 'IL6', 'TIMP1', 'CCN1', 'FABP4', 'EDN1', 'CSF2', 'MMP1', 'FOSB', 'CXCL8', 'NFATC2']	['COL1A2:-', 'CCL2:-', 'PLAU:-', 'MMP9:-', 'IL6:-', 'TIMP1:-', 'CCN1:-', 'FABP4:-', 'EDN1:-', 'CSF2:+', 'MMP1:-', 'FOSB:-', 'CXCL8:-', 'NFATC2:-']
42	REACTOME_DISORDERS_OF_TRANSMEMBRANE_TRANSPORTERS	0.504272	6.46847e-08	['CFTR', 'ABCC8', 'CP', 'ABCC9', 'SLC4A4', 'SLC26A4', 'SLC5A1', 'SLC5A5', 'SLC1A1', 'SLC40A1', 'ABCA12', 'SLC34A2', 'SLC6A20', 'ABCA1', 'ABCA3', 'SLCO2A1', 'SLC24A5', 'SLC6A14']	['CFTR:+', 'ABCC8:+', 'CP:-', 'ABCC9:-', 'SLC4A4:-', 'SLC26A4:-', 'SLC5A1:-', 'SLC5A5:-', 'SLC1A1:-', 'SLC40A1:+', 'ABCA12:-', 'SLC34A2:-', 'SLC6A20:+', 'ABCA1:+', 'ABCA3:+', 'SLCO2A1:+', 'SLC24A5:-', 'SLC6A14:+']
43	PID_HDAC_CLASSII_PATHWAY	0.503962	6.68025e-08	['NCOR2', 'HDAC9']	['NCOR2:-', 'HDAC9:+']
44	WP_PHYSICOCHEMICAL_FEATURES_AND_TOXICITYASSOCIATED_PATHWAYS	0.502402	7.76778e-08	['NOS1', 'GRIA1', 'EGFR', 'ERBB4', 'FN1', 'MYLK']	['NOS1:+', 'GRIA1:+', 'EGFR:+', 'ERBB4:+', 'FN1:-', 'MYLK:+']
45	BIOCARTA_MITR_PATHWAY	0.502162	7.96871e-08	['HDAC9']	['HDAC9:+']
46	REACTOME_HS_GAG_BIOSYNTHESIS	0.501774	8.2898e-08	['HS3ST1', 'GPC4', 'HS3ST2', 'SDC4', 'GPC3', 'HS3ST3A1', 'HS6ST2', 'GPC5', 'EXT1', 'HS3ST4', 'GPC6', 'HS6ST3', 'HS3ST5']	['HS3ST1:-', 'GPC4:-', 'HS3ST2:-', 'SDC4:-', 'GPC3:+', 'HS3ST3A1:-', 'HS6ST2:-', 'GPC5:-', 'EXT1:+', 'HS3ST4:-', 'GPC6:-', 'HS6ST3:-', 'HS3ST5:+']
47	REACTOME_SIGNALING_BY_NOTCH1	0.500904	9.02447e-08	['MAMLD1', 'CNTN1', 'HDAC9', 'RBPJ', 'NBEA', 'NCOR2']	['MAMLD1:-', 'CNTN1:+', 'HDAC9:+', 'RBPJ:-', 'NBEA:-', 'NCOR2:-']
48	WP_TGFBETA_RECEPTOR_SIGNALING_IN_SKELETAL_DYSPLASIAS	0.499392	1.04326e-07	['LTBP1', 'SMAD6', 'THBS1', 'ITGB6', 'LEF1', 'SPP1', 'EGF', 'FBN1', 'ADAMTSL2', 'LIF', 'SERPINE1', 'SMAD3', 'RUNX2', 'INHBA']	['LTBP1:-', 'SMAD6:+', 'THBS1:-', 'ITGB6:-', 'LEF1:-', 'SPP1:-', 'EGF:-', 'FBN1:-', 'ADAMTSL2:-', 'LIF:-', 'SERPINE1:-', 'SMAD3:-', 'RUNX2:-', 'INHBA:-']
49	WP_ANGIOTENSIN_II_RECEPTOR_TYPE_1_PATHWAY	0.499339	1.05137e-07	['NOX4', 'COL1A2', 'COL1A1', 'ACTA2', 'SMAD3', 'ACE2', 'CCN2', 'PDGFD']	['NOX4:-', 'COL1A2:-', 'COL1A1:-', 'ACTA2:-', 'SMAD3:-', 'ACE2:-', 'CCN2:-', 'PDGFD:-']
50	REACTOME_PROTEIN_PROTEIN_INTERACTIONS_AT_SYNAPSES	0.499023	1.08612e-07	['NRXN3', 'SYT1', 'EPB41L3', 'EPB41L1', 'APBA1', 'SYT10', 'LIN7A', 'EPB41L5', 'PPFIA2', 'NTRK3', 'NLGN4X', 'DLG2', 'HOMER1', 'PTPRD', 'GRIA1', 'SHANK2', 'NLGN4Y', 'GRM5', 'IL1RAPL1', 'NLGN1', 'DLGAP1', 'LRRTM4', 'NRXN1', 'GRIN2A', 'IL1RAPL2', 'DLGAP2', 'LRRTM3', 'GRIN2B']	['NRXN3:+', 'SYT1:-', 'EPB41L3:+', 'EPB41L1:-', 'APBA1:-', 'SYT10:-', 'LIN7A:+', 'EPB41L5:+', 'PPFIA2:-', 'NTRK3:-', 'NLGN4X:-', 'DLG2:-', 'HOMER1:-', 'PTPRD:-', 'GRIA1:+', 'SHANK2:-', 'NLGN4Y:-', 'GRM5:-', 'IL1RAPL1:-', 'NLGN1:-', 'DLGAP1:+', 'LRRTM4:+', 'NRXN1:-', 'GRIN2A:-', 'IL1RAPL2:-', 'DLGAP2:-', 'LRRTM3:+', 'GRIN2B:+']
51	REACTOME_CELL_JUNCTION_ORGANIZATION	0.496951	1.32169e-07	['CDH1', 'LAMA3', 'LAMC2', 'CDH3', 'COL17A1', 'CLDN18', 'ITGA6', 'CDH6', 'CLDN16', 'PATJ', 'CDH11', 'CDH13', 'SDK1', 'CDH8', 'CDH12', 'CLDN1', 'CDH2', 'CADM2', 'CDH4', 'CADM1', 'CLDN5', 'KRT5', 'KRT14', 'LAMB3']	['CDH1:-', 'LAMA3:+', 'LAMC2:-', 'CDH3:-', 'COL17A1:-', 'CLDN18:+', 'ITGA6:-', 'CDH6:-', 'CLDN16:-', 'PATJ:+', 'CDH11:-', 'CDH13:+', 'SDK1:+', 'CDH8:+', 'CDH12:+', 'CLDN1:-', 'CDH2:-', 'CADM2:+', 'CDH4:+', 'CADM1:+', 'CLDN5:-', 'KRT5:-', 'KRT14:-', 'LAMB3:-']
52	WP_CALCIUM_REGULATION_IN_CARDIAC_CELLS	0.496572	1.37307e-07	['GNGT1', 'GJA5', 'ADCY5', 'ADCY8', 'RGS7', 'ATP1B1', 'RGS6', 'CACNA1A', 'CACNA1B', 'CACNA1C', 'CACNA1D', 'CACNA1E', 'CAMK2B', 'RYR3', 'RYR2', 'PKIB', 'CHRM3', 'CHRM2', 'ADRA1A', 'PKIA', 'GJC1', 'SLC8A1', 'PRKCB', 'ITPR3', 'GRK5', 'PRKCZ', 'PRKCQ', 'RGS4', 'SFN', 'ADCY2']	['GNGT1:-', 'GJA5:-', 'ADCY5:-', 'ADCY8:+', 'RGS7:-', 'ATP1B1:-', 'RGS6:+', 'CACNA1A:-', 'CACNA1B:-', 'CACNA1C:-', 'CACNA1D:+', 'CACNA1E:-', 'CAMK2B:-', 'RYR3:-', 'RYR2:-', 'PKIB:-', 'CHRM3:+', 'CHRM2:+', 'ADRA1A:+', 'PKIA:+', 'GJC1:-', 'SLC8A1:+', 'PRKCB:-', 'ITPR3:+', 'GRK5:+', 'PRKCZ:+', 'PRKCQ:-', 'RGS4:-', 'SFN:-', 'ADCY2:-']
53	REACTOME_NOTCH1_INTRACELLULAR_DOMAIN_REGULATES_TRANSCRIPTION	0.493399	1.84657e-07	['MAMLD1', 'HDAC9', 'RBPJ', 'NBEA', 'NCOR2']	['MAMLD1:-', 'HDAC9:+', 'RBPJ:-', 'NBEA:-', 'NCOR2:-']
54	REACTOME_CHEMOKINE_RECEPTORS_BIND_CHEMOKINES	0.492688	1.97707e-07	['CX3CL1', 'CXCL2', 'CCL22', 'CXCL12', 'CCL2', 'CCL20', 'CCL21', 'CXCL9', 'CXCL3', 'CXCL1', 'CXCL10', 'CXCL11', 'CXCL8', 'CCL19', 'CCL4']	['CX3CL1:-', 'CXCL2:-', 'CCL22:-', 'CXCL12:-', 'CCL2:-', 'CCL20:-', 'CCL21:-', 'CXCL9:+', 'CXCL3:-', 'CXCL1:-', 'CXCL10:-', 'CXCL11:-', 'CXCL8:-', 'CCL19:-', 'CCL4:-']
55	WP_GDNFRET_SIGNALING_AXIS	0.491702	2.17023e-07	['SLIT2', 'ROBO2', 'AGTR2', 'EYA1', 'GFRA1', 'GREM1']	['SLIT2:+', 'ROBO2:+', 'AGTR2:-', 'EYA1:-', 'GFRA1:-', 'GREM1:-']
56	WP_ENDOCHONDRAL_OSSIFICATION_WITH_SKELETAL_DYSPLASIAS,WP_ENDOCHONDRAL_OSSIFICATION	0.490928	2.33618e-07	['MGP', 'TGFB2', 'IGF1', 'HMGCS1', 'COL10A1', 'ALPL', 'PTHLH', 'SPP1', 'ENPP1', 'ACAN', 'FGF2', 'BMP6', 'CTSV', 'SOX5', 'TIMP3', 'ADAMTS5', 'SOX9', 'SOX6', 'RUNX2', 'PLAT', 'PLAU', 'MMP9']	['MGP:-', 'TGFB2:+', 'IGF1:-', 'HMGCS1:+', 'COL10A1:-', 'ALPL:-', 'PTHLH:-', 'SPP1:-', 'ENPP1:-', 'ACAN:+', 'FGF2:-', 'BMP6:-', 'CTSV:-', 'SOX5:+', 'TIMP3:+', 'ADAMTS5:-', 'SOX9:-', 'SOX6:-', 'RUNX2:-', 'PLAT:+', 'PLAU:-', 'MMP9:-']
57	REACTOME_ABC_TRANSPORTER_DISORDERS	0.486641	3.45625e-07	['CFTR', 'ABCC8', 'ABCC9', 'ABCA12', 'ABCA1', 'ABCA3']	['CFTR:+', 'ABCC8:+', 'ABCC9:-', 'ABCA12:-', 'ABCA1:+', 'ABCA3:+']
58	REACTOME_DEFECTIVE_EXT2_CAUSES_EXOSTOSES_2	0.486378	3.54912e-07	['GPC4', 'SDC4', 'GPC3', 'GPC5', 'EXT1', 'GPC6']	['GPC4:-', 'SDC4:-', 'GPC3:+', 'GPC5:-', 'EXT1:+', 'GPC6:-']
59	WP_NETWORK_MAP_OF_SARSCOV2_SIGNALING_PATHWAY	0.485872	3.72516e-07	['CCL4', 'CCL2', 'RRM2', 'CCL20', 'CCL21', 'CCL22', 'SERPINE1', 'CXCL12', 'ACE2', 'FN1', 'SAA1', 'FGA', 'IL6', 'CXCL1', 'PTGS2', 'CXCL3', 'CXCL2', 'FGF2', 'CXCL8', 'COL7A1', 'IGFBP3', 'DEPTOR', 'HP', 'AHR', 'FGG', 'IL1R2', 'FAM83A', 'PRKCQ', 'IL18', 'SKAP1', 'CXCL9', 'GTSE1', 'CXCL10']	['CCL4:-', 'CCL2:-', 'RRM2:+', 'CCL20:-', 'CCL21:-', 'CCL22:-', 'SERPINE1:-', 'CXCL12:-', 'ACE2:-', 'FN1:-', 'SAA1:-', 'FGA:-', 'IL6:-', 'CXCL1:-', 'PTGS2:-', 'CXCL3:-', 'CXCL2:-', 'FGF2:-', 'CXCL8:-', 'COL7A1:-', 'IGFBP3:-', 'DEPTOR:-', 'HP:-', 'AHR:-', 'FGG:+', 'IL1R2:+', 'FAM83A:-', 'PRKCQ:-', 'IL18:-', 'SKAP1:-', 'CXCL9:+', 'GTSE1:-', 'CXCL10:-']
60	REACTOME_METABOLISM_OF_LIPIDS	0.485666	3.80608e-07	['ACSM3', 'ELOVL5', 'CYP24A1', 'MSMO1', 'ME1', 'PLPP1', 'ACSL4', 'OSBPL3', 'PTGS2', 'MGLL', 'OSBPL6', 'LRP2', 'HSD17B2', 'ACHE', 'SCD', 'LPIN2', 'STS', 'BMX', 'CAV1', 'AHR', 'PIP5K1B', 'ABCC3', 'INPP4B', 'PPARGC1A', 'ACSS3', 'HMGCS1', 'ACADL', 'FHL2', 'MOGAT1', 'PTGIS', 'PLA2G5', 'PPARG', 'CD36', 'BAAT', 'SLC44A5', 'CYP1B1', 'CH25H', 'GPAT3', 'PIK3C2G', 'SLC27A2', 'OSBPL10', 'PLA1A', 'SCD5', 'TNF…	['ACSM3:+', 'ELOVL5:-', 'CYP24A1:-', 'MSMO1:+', 'ME1:-', 'PLPP1:-', 'ACSL4:-', 'OSBPL3:-', 'PTGS2:-', 'MGLL:+', 'OSBPL6:-', 'LRP2:+', 'HSD17B2:+', 'ACHE:-', 'SCD:+', 'LPIN2:+', 'STS:-', 'BMX:-', 'CAV1:-', 'AHR:-', 'PIP5K1B:+', 'ABCC3:-', 'INPP4B:+', 'PPARGC1A:+', 'ACSS3:+', 'HMGCS1:+', 'ACADL:+', 'FHL2:-', 'MOGAT1:-', 'PTGIS:-', 'PLA2G5:-', 'PPARG:+', 'CD36:+', 'BAAT:-', 'SLC44A5:-', 'CYP1B1:-', …
61	WP_DEVELOPMENT_OF_URETERIC_COLLECTION_SYSTEM	0.483338	4.7005e-07	['CELSR1', 'TGFB2', 'GREB1L', 'SHH', 'SLIT2', 'WT1', 'GFRA1', 'FREM2', 'GPC3', 'ROBO2', 'ROBO1', 'GRIP1', 'HNF1B', 'BMP2', 'FRAS1', 'BMP5', 'BMPER', 'ANOS1', 'FGFR2', 'EYA1', 'CRIM1', 'ITGA8', 'GLI2']	['CELSR1:-', 'TGFB2:+', 'GREB1L:-', 'SHH:-', 'SLIT2:+', 'WT1:-', 'GFRA1:-', 'FREM2:+', 'GPC3:+', 'ROBO2:+', 'ROBO1:-', 'GRIP1:-', 'HNF1B:-', 'BMP2:-', 'FRAS1:+', 'BMP5:-', 'BMPER:+', 'ANOS1:+', 'FGFR2:-', 'EYA1:-', 'CRIM1:+', 'ITGA8:+', 'GLI2:-']
62	WP_VEGFAVEGFR2_SIGNALING_PATHWAY	0.481424	5.58784e-07	['LDB2', 'MYH11', 'FLT1', 'KDR', 'CCN2', 'FN1', 'NFATC2', 'RND1', 'MYO6', 'FGA', 'PTGS2', 'CXCL8', 'CAV1', 'PTPN1', 'MMP10', 'IGFBP3', 'FHL2', 'F3', 'FGG', 'INPP4B', 'PTPRJ', 'SELE', 'CCN1', 'IGFBP7', 'PLA2G5', 'ICAM1', 'BMP2', 'EPHB2', 'RCAN2', 'NRP2', 'SOD2', 'BMX', 'ANXA1', 'PLAU', 'PLAUR', 'SLC8A1', 'PRKCB', 'ERN1', 'PRKG1', 'PRKCZ', 'NEXN', 'ADAMTS9', 'EZR', 'HDAC9', 'BCL2L1', 'CCL2', 'MICAL…	['LDB2:-', 'MYH11:-', 'FLT1:+', 'KDR:+', 'CCN2:-', 'FN1:-', 'NFATC2:-', 'RND1:+', 'MYO6:+', 'FGA:-', 'PTGS2:-', 'CXCL8:-', 'CAV1:-', 'PTPN1:-', 'MMP10:-', 'IGFBP3:-', 'FHL2:-', 'F3:-', 'FGG:+', 'INPP4B:+', 'PTPRJ:+', 'SELE:-', 'CCN1:-', 'IGFBP7:-', 'PLA2G5:-', 'ICAM1:-', 'BMP2:-', 'EPHB2:-', 'RCAN2:-', 'NRP2:-', 'SOD2:+', 'BMX:-', 'ANXA1:-', 'PLAU:-', 'PLAUR:-', 'SLC8A1:+', 'PRKCB:-', 'ERN1:-', '…
63	REACTOME_CARDIAC_CONDUCTION	0.481267	5.68298e-07	['CACNA2D2', 'CAMK2B', 'ATP2B4', 'ABCC9', 'CACNG4', 'TBX5', 'NOS1', 'ITPR3', 'FGF14', 'FGF12', 'FGF13', 'CACNG6', 'KCNK1', 'SCN2A', 'SCN7A', 'ATP1B1', 'SCN1A', 'CORIN', 'CACNA1C', 'KCNE4', 'SCN3A', 'CACNB2', 'KCNK3', 'KCNE1', 'KCNIP1', 'SLC8A1', 'KCND2', 'KCNIP4', 'ASPH', 'RYR2', 'RYR3']	['CACNA2D2:+', 'CAMK2B:-', 'ATP2B4:-', 'ABCC9:-', 'CACNG4:-', 'TBX5:+', 'NOS1:+', 'ITPR3:+', 'FGF14:-', 'FGF12:+', 'FGF13:-', 'CACNG6:-', 'KCNK1:-', 'SCN2A:-', 'SCN7A:+', 'ATP1B1:-', 'SCN1A:+', 'CORIN:-', 'CACNA1C:-', 'KCNE4:-', 'SCN3A:-', 'CACNB2:+', 'KCNK3:+', 'KCNE1:-', 'KCNIP1:+', 'SLC8A1:+', 'KCND2:-', 'KCNIP4:+', 'ASPH:-', 'RYR2:-', 'RYR3:-']
64	WP_DISRUPTION_OF_POSTSYNAPTIC_SIGNALING_BY_CNV	0.480599	6.04657e-07	['NRXN3', 'NLGN1', 'NLGN4X', 'GRIN2B', 'GRIN2A', 'CAMK2B', 'NRXN1', 'RYR2', 'HOMER1', 'DLG2', 'DLGAP1']	['NRXN3:+', 'NLGN1:-', 'NLGN4X:-', 'GRIN2B:+', 'GRIN2A:-', 'CAMK2B:-', 'NRXN1:-', 'RYR2:-', 'HOMER1:-', 'DLG2:-', 'DLGAP1:+']
65	REACTOME_G_ALPHA_I_SIGNALLING_EVENTS	0.478873	7.05938e-07	['CX3CL1', 'CASR', 'PTGER3', 'CAMK2B', 'ADCY2', 'CXCL2', 'ITPR3', 'C5', 'CXCL12', 'PDE4D', 'CCL20', 'PDE1A', 'RGS4', 'C3', 'RGS13', 'GNGT1', 'RGS22', 'NMUR2', 'APLNR', 'ANXA1', 'GABBR2', 'CCL21', 'CXCL9', 'PDE1C', 'ADCY8', 'GNA14', 'CXCL3', 'CXCL1', 'CXCL10', 'CXCL11', 'CXCL8', 'LPAR3', 'CCL19', 'NBEA', 'ADCY5', 'SAA1', 'P2RY14', 'HTR1F', 'GRM8', 'AGTR2', 'CHRM2', 'PLCB1', 'RGS6', 'RGS7', 'GRM7',…	['CX3CL1:-', 'CASR:-', 'PTGER3:-', 'CAMK2B:-', 'ADCY2:-', 'CXCL2:-', 'ITPR3:+', 'C5:+', 'CXCL12:-', 'PDE4D:+', 'CCL20:-', 'PDE1A:-', 'RGS4:-', 'C3:-', 'RGS13:-', 'GNGT1:-', 'RGS22:-', 'NMUR2:+', 'APLNR:-', 'ANXA1:-', 'GABBR2:-', 'CCL21:-', 'CXCL9:+', 'PDE1C:+', 'ADCY8:+', 'GNA14:+', 'CXCL3:-', 'CXCL1:-', 'CXCL10:-', 'CXCL11:-', 'CXCL8:-', 'LPAR3:-', 'CCL19:-', 'NBEA:-', 'ADCY5:-', 'SAA1:-', 'P2RY…
66	WP_ETHANOL_EFFECTS_ON_HISTONE_MODIFICATIONS	0.477715	7.8364e-07	['ALDH1A2', 'ACSS2', 'HDAC9', 'ALDH1A3']	['ALDH1A2:-', 'ACSS2:+', 'HDAC9:+', 'ALDH1A3:-']
67	REACTOME_RAC3_GTPASE_CYCLE	0.476232	8.94554e-07	['BAIAP2L1', 'ARHGAP6', 'CAV1', 'DIAPH3', 'MPP7', 'ARHGAP42', 'NHS']	['BAIAP2L1:-', 'ARHGAP6:+', 'CAV1:-', 'DIAPH3:+', 'MPP7:-', 'ARHGAP42:-', 'NHS:-']
68	KEGG_AXON_GUIDANCE	0.475807	9.30993e-07	['SEMA4A', 'ROBO1', 'SLIT2', 'ROBO2', 'SEMA6D', 'NTNG1', 'SEMA6A', 'SRGAP3', 'RND1', 'MET', 'SLIT3', 'PAK5', 'NTN1', 'LRRC4C', 'SEMA3C', 'CXCL12', 'SEMA5A', 'NFATC2', 'DCC', 'UNC5D', 'PAK3', 'SEMA3D', 'EPHB2', 'EFNA5', 'EFNB2', 'SEMA3A', 'UNC5C', 'SEMA3E', 'NTN4', 'EPHA7', 'EPHA3', 'EPHA4', 'EPHA6']	['SEMA4A:+', 'ROBO1:-', 'SLIT2:+', 'ROBO2:+', 'SEMA6D:+', 'NTNG1:+', 'SEMA6A:+', 'SRGAP3:-', 'RND1:+', 'MET:-', 'SLIT3:+', 'PAK5:+', 'NTN1:-', 'LRRC4C:-', 'SEMA3C:-', 'CXCL12:-', 'SEMA5A:+', 'NFATC2:-', 'DCC:+', 'UNC5D:+', 'PAK3:-', 'SEMA3D:-', 'EPHB2:-', 'EFNA5:-', 'EFNB2:+', 'SEMA3A:-', 'UNC5C:-', 'SEMA3E:+', 'NTN4:+', 'EPHA7:+', 'EPHA3:-', 'EPHA4:-', 'EPHA6:+']
69	WP_CLEAR_CELL_RENAL_CELL_CARCINOMA_PATHWAYS	0.475093	9.93482e-07	['DEPTOR', 'TGFB2', 'CDH13', 'PFKP', 'KSR1', 'PLOD2', 'PGBD5', 'ME1', 'ENPP3', 'FLT1', 'PGM1', 'SDS', 'ACACA', 'EGFR', 'RAPGEF5', 'KDR', 'SQSTM1']	['DEPTOR:-', 'TGFB2:+', 'CDH13:+', 'PFKP:-', 'KSR1:-', 'PLOD2:-', 'PGBD5:-', 'ME1:-', 'ENPP3:-', 'FLT1:+', 'PGM1:-', 'SDS:-', 'ACACA:+', 'EGFR:+', 'RAPGEF5:+', 'KDR:+', 'SQSTM1:+']
70	REACTOME_CELL_CELL_COMMUNICATION	0.474328	1.06471e-06	['CDH1', 'LAMA3', 'LAMC2', 'CDH3', 'COL17A1', 'CLDN18', 'ITGA6', 'CDH6', 'CLDN16', 'SFTPA1', 'PATJ', 'SFTPD', 'CDH11', 'CDH13', 'SDK1', 'KIRREL3', 'CDH8', 'CDH12', 'CLDN1', 'CDH2', 'CADM2', 'CDH4', 'CADM1', 'CLDN5', 'SFTPA2', 'KRT5', 'KRT14', 'LAMB3']	['CDH1:-', 'LAMA3:+', 'LAMC2:-', 'CDH3:-', 'COL17A1:-', 'CLDN18:+', 'ITGA6:-', 'CDH6:-', 'CLDN16:-', 'SFTPA1:+', 'PATJ:+', 'SFTPD:+', 'CDH11:-', 'CDH13:+', 'SDK1:+', 'KIRREL3:-', 'CDH8:+', 'CDH12:+', 'CLDN1:-', 'CDH2:-', 'CADM2:+', 'CDH4:+', 'CADM1:+', 'CLDN5:-', 'SFTPA2:+', 'KRT5:-', 'KRT14:-', 'LAMB3:-']
71	KEGG_TIGHT_JUNCTION	0.470943	1.42867e-06	['PATJ', 'EPB41L3', 'MYH14', 'RRAS2', 'CLDN18', 'LLGL2', 'MAGI3', 'CLDN16', 'MYH11', 'MYH10', 'PRKCB', 'CLDN5', 'CLDN1', 'PRKCQ', 'PRKCZ', 'PPP2R2B', 'RAB3B', 'CTNNA3', 'EPB41L1']	['PATJ:+', 'EPB41L3:+', 'MYH14:-', 'RRAS2:+', 'CLDN18:+', 'LLGL2:+', 'MAGI3:+', 'CLDN16:-', 'MYH11:-', 'MYH10:+', 'PRKCB:-', 'CLDN5:-', 'CLDN1:-', 'PRKCQ:-', 'PRKCZ:+', 'PPP2R2B:-', 'RAB3B:-', 'CTNNA3:-', 'EPB41L1:-']
72	WP_MAPK_SIGNALING_PATHWAY	0.469006	1.69005e-06	['CACNG4', 'MAPK10', 'CACNG6', 'RASGRP3', 'IL1R1', 'LRRK2', 'FGF7', 'EGF', 'FGF2', 'FGF1', 'EGFR', 'FGFR2', 'FGF14', 'FGF13', 'FGF12', 'FGF10', 'BDNF', 'DUSP6', 'TGFB2', 'DUSP10', 'RRAS2', 'IL1R2', 'PLA2G4F', 'CACNA1A', 'CACNA1B', 'CACNA1C', 'CACNA1D', 'CACNA1E', 'CACNA2D2', 'NTRK2', 'CACNB2', 'CACNB4', 'RASGRP1', 'NGF', 'DUSP16', 'MAP3K13', 'CACNA2D3', 'RASGRF1', 'RASGRF2']	['CACNG4:-', 'MAPK10:-', 'CACNG6:-', 'RASGRP3:+', 'IL1R1:-', 'LRRK2:-', 'FGF7:-', 'EGF:-', 'FGF2:-', 'FGF1:-', 'EGFR:+', 'FGFR2:-', 'FGF14:-', 'FGF13:-', 'FGF12:+', 'FGF10:+', 'BDNF:+', 'DUSP6:+', 'TGFB2:+', 'DUSP10:-', 'RRAS2:+', 'IL1R2:+', 'PLA2G4F:+', 'CACNA1A:-', 'CACNA1B:-', 'CACNA1C:-', 'CACNA1D:+', 'CACNA1E:-', 'CACNA2D2:+', 'NTRK2:+', 'CACNB2:+', 'CACNB4:+', 'RASGRP1:-', 'NGF:+', 'DUSP16:…
73	KEGG_AMYOTROPHIC_LATERAL_SCLEROSIS_ALS	0.468397	1.78507e-06	['CAT', 'GRIN2A', 'GRIN2B', 'NOS1', 'SLC1A2', 'GRIA1', 'BCL2L1']	['CAT:+', 'GRIN2A:-', 'GRIN2B:+', 'NOS1:+', 'SLC1A2:-', 'GRIA1:+', 'BCL2L1:-']
74	PID_HIF1_TFPATHWAY	0.466838	2.04263e-06	['EGLN3', 'PGM1', 'HNF4A', 'NDRG1', 'SERPINE1', 'EDN1', 'ABCB1', 'TFF3', 'CXCL12', 'SMAD3', 'HMOX1', 'CP']	['EGLN3:-', 'PGM1:-', 'HNF4A:-', 'NDRG1:-', 'SERPINE1:-', 'EDN1:-', 'ABCB1:-', 'TFF3:-', 'CXCL12:-', 'SMAD3:-', 'HMOX1:+', 'CP:-']
75	WP_COMPLEMENT_SYSTEM	0.465777	2.24034e-06	['SFTPA1', 'FGG', 'LAMB1', 'THBS1', 'SELE', 'SFTPA2', 'ICAM2', 'ICAM1', 'ITGA2', 'PLAUR', 'CR2', 'C3', 'FGA', 'C4BPA', 'C5', 'C6', 'SPP1', 'LRP2', 'C7', 'C9', 'PTX3', 'CD55']	['SFTPA1:+', 'FGG:+', 'LAMB1:-', 'THBS1:-', 'SELE:-', 'SFTPA2:+', 'ICAM2:-', 'ICAM1:-', 'ITGA2:-', 'PLAUR:-', 'CR2:-', 'C3:-', 'FGA:-', 'C4BPA:+', 'C5:+', 'C6:-', 'SPP1:-', 'LRP2:+', 'C7:+', 'C9:+', 'PTX3:-', 'CD55:+']
76	PID_SMAD2_3NUCLEAR_PATHWAY	0.463091	2.81275e-06	['HNF4A', 'RUNX1', 'SMAD3', 'SERPINE1', 'RUNX2', 'COL1A2']	['HNF4A:-', 'RUNX1:-', 'SMAD3:-', 'SERPINE1:-', 'RUNX2:-', 'COL1A2:-']
77	WP_VITAMIN_DSENSITIVE_CALCIUM_SIGNALING_IN_DEPRESSION	0.462009	3.08663e-06	['TPH1', 'ATP2B4', 'CACNA1C', 'SLC8A1', 'ITPR3', 'GCLC', 'GRIN2B', 'GRIN2A', 'KCNQ3', 'GRM5']	['TPH1:-', 'ATP2B4:-', 'CACNA1C:-', 'SLC8A1:+', 'ITPR3:+', 'GCLC:-', 'GRIN2B:+', 'GRIN2A:-', 'KCNQ3:-', 'GRM5:-']
78	REACTOME_SIGNALING_BY_NOTCH	0.461798	3.1508e-06	['MAMLD1', 'CNTN1', 'HDAC9', 'ST3GAL6', 'ACTA2', 'WWC1', 'EGF', 'EGFR', 'RUNX1', 'SMAD3', 'RBPJ', 'NBEA', 'NCOR2']	['MAMLD1:-', 'CNTN1:+', 'HDAC9:+', 'ST3GAL6:+', 'ACTA2:-', 'WWC1:+', 'EGF:-', 'EGFR:+', 'RUNX1:-', 'SMAD3:-', 'RBPJ:-', 'NBEA:-', 'NCOR2:-']
79	PID_HNF3B_PATHWAY	0.461192	3.32285e-06	['HNF4A', 'ABCC8', 'HMGCS1', 'HNF1B']	['HNF4A:-', 'ABCC8:+', 'HMGCS1:+', 'HNF1B:-']
80	REACTOME_SENSORY_PROCESSING_OF_SOUND	0.460393	3.56061e-06	['CACNA2D2', 'MYO3B', 'KCNN2', 'EPB41L3', 'EPB41L1', 'EZR', 'RIPOR2', 'CLIC5', 'SNAP25', 'PCDH15', 'EPS8', 'KCNMA1', 'CACNA1D', 'CACNB2', 'PCLO']	['CACNA2D2:+', 'MYO3B:-', 'KCNN2:-', 'EPB41L3:+', 'EPB41L1:-', 'EZR:-', 'RIPOR2:+', 'CLIC5:+', 'SNAP25:-', 'PCDH15:+', 'EPS8:-', 'KCNMA1:-', 'CACNA1D:+', 'CACNB2:+', 'PCLO:+']
81	REACTOME_NUCLEAR_SIGNALING_BY_ERBB4	0.460318	3.59371e-06	['CXCL12', 'SPARC', 'EREG', 'APOE', 'YAP1', 'NRG1', 'NRG2', 'NRG4', 'BTC', 'ERBB4', 'NRG3']	['CXCL12:-', 'SPARC:-', 'EREG:-', 'APOE:-', 'YAP1:+', 'NRG1:-', 'NRG2:+', 'NRG4:-', 'BTC:-', 'ERBB4:+', 'NRG3:+']
82	PID_ERBB_NETWORK_PATHWAY	0.45901	4.01405e-06	['NRG4', 'NRG2', 'EGFR', 'AREG', 'BTC', 'NRG3', 'ERBB4', 'EGF', 'NRG1', 'EREG']	['NRG4:-', 'NRG2:+', 'EGFR:+', 'AREG:-', 'BTC:-', 'NRG3:+', 'ERBB4:+', 'EGF:-', 'NRG1:-', 'EREG:-']
83	REACTOME_SIGNALING_BY_ERBB2,REACTOME_SIGNALING_BY_ERBB2_IN_CANCER,REACTOME_SHC1_EVENTS_IN_ERBB2_SIGNALING,REACTOME_GRB2_EVENTS_IN_ERBB2_SIGNALING,REACTOME_PI3K_EVENTS_IN_ERBB2_SIGNALING,REACTOME_ERBB2_REGULATES_CELL_MOTILITY,REACTOME_ERBB2_ACTIVATES_PTK6_SIGNALING,REACTOME_DOWNREGULATION_OF_ERBB2_SIGNALING	0.455173	5.50393e-06	['EREG', 'EGF', 'EGFR', 'NRG1', 'NRG2', 'NRG4', 'BTC', 'ERBB4', 'NRG3']	['EREG:-', 'EGF:-', 'EGFR:+', 'NRG1:-', 'NRG2:+', 'NRG4:-', 'BTC:-', 'ERBB4:+', 'NRG3:+']
84	KEGG_NEUROACTIVE_LIGAND_RECEPTOR_INTERACTION	0.454065	6.03774e-06	['PTGFR', 'PTGER3', 'CALCRL', 'TACR1', 'NMUR2', 'PRLR', 'NPFFR2', 'APLNR', 'AGTR2', 'GRIK2', 'GRID1', 'GRIA1', 'GABRG3', 'GABRB2', 'HTR1F', 'ADRA1A', 'LPAR3', 'HRH1', 'LPAR1', 'EDNRB', 'CHRM2', 'CHRM3', 'GABBR2', 'VIPR2', 'GPR156', 'GRM5', 'GRM8', 'GRM7', 'F2RL3', 'GRIN2A', 'GRIN2B', 'GRIK4', 'SCTR', 'P2RY14']	['PTGFR:-', 'PTGER3:-', 'CALCRL:+', 'TACR1:-', 'NMUR2:+', 'PRLR:+', 'NPFFR2:+', 'APLNR:-', 'AGTR2:-', 'GRIK2:-', 'GRID1:-', 'GRIA1:+', 'GABRG3:-', 'GABRB2:-', 'HTR1F:-', 'ADRA1A:+', 'LPAR3:-', 'HRH1:-', 'LPAR1:+', 'EDNRB:+', 'CHRM2:+', 'CHRM3:+', 'GABBR2:-', 'VIPR2:-', 'GPR156:-', 'GRM5:-', 'GRM8:+', 'GRM7:-', 'F2RL3:-', 'GRIN2A:-', 'GRIN2B:+', 'GRIK4:+', 'SCTR:-', 'P2RY14:-']
85	REACTOME_MUSCLE_CONTRACTION	0.453306	6.43809e-06	['CACNA2D2', 'CAMK2B', 'ATP2B4', 'MYLK', 'ABCC9', 'CACNG4', 'TBX5', 'NOS1', 'SORBS1', 'ITPR3', 'FGF14', 'ACTA2', 'FGF12', 'FGF13', 'CACNG6', 'TNNT3', 'TNNI2', 'MYH11', 'ANXA1', 'KCNK1', 'SCN2A', 'SCN7A', 'TPM1', 'ATP1B1', 'SCN1A', 'CORIN', 'CACNA1C', 'KCNE4', 'GUCY1A2', 'SCN3A', 'TTN', 'ACTG2', 'LMOD1', 'CACNB2', 'KCNK3', 'DES', 'KCNE1', 'KCNIP1', 'ANXA2', 'SLC8A1', 'KCND2', 'KCNIP4', 'ASPH', 'RY…	['CACNA2D2:+', 'CAMK2B:-', 'ATP2B4:-', 'MYLK:+', 'ABCC9:-', 'CACNG4:-', 'TBX5:+', 'NOS1:+', 'SORBS1:+', 'ITPR3:+', 'FGF14:-', 'ACTA2:-', 'FGF12:+', 'FGF13:-', 'CACNG6:-', 'TNNT3:-', 'TNNI2:-', 'MYH11:-', 'ANXA1:-', 'KCNK1:-', 'SCN2A:-', 'SCN7A:+', 'TPM1:-', 'ATP1B1:-', 'SCN1A:+', 'CORIN:-', 'CACNA1C:-', 'KCNE4:-', 'GUCY1A2:+', 'SCN3A:-', 'TTN:+', 'ACTG2:-', 'LMOD1:-', 'CACNB2:+', 'KCNK3:+', 'DES:…
86	BIOCARTA_RHO_PATHWAY	0.452242	7.03422e-06	['ARHGAP6', 'PIP5K1B']	['ARHGAP6:+', 'PIP5K1B:+']
87	WP_RAC1PAK1P38MMP2_PATHWAY	0.449868	8.52578e-06	['TNIP3', 'NOS1', 'YAP1', 'TEK', 'ANGPT1', 'ANGPT2', 'EGFR', 'FN1']	['TNIP3:-', 'NOS1:+', 'YAP1:+', 'TEK:+', 'ANGPT1:+', 'ANGPT2:-', 'EGFR:+', 'FN1:-']
88	PID_FRA_PATHWAY	0.448893	9.23994e-06	['MMP9', 'MGP', 'PLAUR', 'LAMA3', 'HMOX1', 'NFATC2', 'COL1A2', 'PLAU', 'LIF', 'CCL2', 'CXCL8', 'THBD', 'IL6', 'MMP1']	['MMP9:-', 'MGP:-', 'PLAUR:-', 'LAMA3:+', 'HMOX1:+', 'NFATC2:-', 'COL1A2:-', 'PLAU:-', 'LIF:-', 'CCL2:-', 'CXCL8:-', 'THBD:+', 'IL6:-', 'MMP1:-']
89	KEGG_ALZHEIMERS_DISEASE	0.447376	1.04474e-05	['BACE2', 'ITPR3', 'APOE', 'ERN1', 'PLCB1', 'RYR3', 'GRIN2A', 'GRIN2B', 'CACNA1D', 'CACNA1C', 'NOS1', 'SNCA']	['BACE2:-', 'ITPR3:+', 'APOE:-', 'ERN1:-', 'PLCB1:-', 'RYR3:-', 'GRIN2A:-', 'GRIN2B:+', 'CACNA1D:+', 'CACNA1C:-', 'NOS1:+', 'SNCA:+']
90	NABA_COLLAGENS	0.446643	1.11018e-05	['COL10A1', 'COL11A1', 'COL12A1', 'COL14A1', 'COL15A1', 'COL17A1', 'COL1A1', 'COL1A2', 'COL21A1', 'COL22A1', 'COL23A1', 'COL24A1', 'COL25A1', 'COL27A1', 'COL28A1', 'COL3A1', 'COL4A1', 'COL4A2', 'COL4A3', 'COL4A4', 'COL4A6', 'COL5A1', 'COL5A2', 'COL5A3', 'COL6A3', 'COL6A6', 'COL7A1', 'COL8A1']	['COL10A1:-', 'COL11A1:-', 'COL12A1:-', 'COL14A1:-', 'COL15A1:-', 'COL17A1:-', 'COL1A1:-', 'COL1A2:-', 'COL21A1:-', 'COL22A1:-', 'COL23A1:-', 'COL24A1:-', 'COL25A1:-', 'COL27A1:-', 'COL28A1:-', 'COL3A1:-', 'COL4A1:-', 'COL4A2:-', 'COL4A3:+', 'COL4A4:+', 'COL4A6:-', 'COL5A1:-', 'COL5A2:-', 'COL5A3:-', 'COL6A3:-', 'COL6A6:+', 'COL7A1:-', 'COL8A1:-']
91	REACTOME_COLLAGEN_CHAIN_TRIMERIZATION	0.446643	1.11376e-05	['COL23A1', 'COL11A1', 'COL17A1', 'COL5A3', 'COL4A4', 'COL1A1', 'COL12A1', 'COL7A1', 'COL10A1', 'COL21A1', 'COL5A1', 'COL4A2', 'COL8A1', 'COL6A3', 'COL1A2', 'COL3A1', 'COL4A3', 'COL22A1', 'COL24A1', 'COL4A1', 'COL14A1', 'COL25A1', 'COL27A1', 'COL4A6', 'COL5A2', 'COL15A1', 'COL6A6', 'COL28A1']	['COL23A1:-', 'COL11A1:-', 'COL17A1:-', 'COL5A3:-', 'COL4A4:+', 'COL1A1:-', 'COL12A1:-', 'COL7A1:-', 'COL10A1:-', 'COL21A1:-', 'COL5A1:-', 'COL4A2:-', 'COL8A1:-', 'COL6A3:-', 'COL1A2:-', 'COL3A1:-', 'COL4A3:+', 'COL22A1:-', 'COL24A1:-', 'COL4A1:-', 'COL14A1:-', 'COL25A1:-', 'COL27A1:-', 'COL4A6:-', 'COL5A2:-', 'COL15A1:-', 'COL6A6:+', 'COL28A1:-']
92	REACTOME_ADRENALINE_NORADRENALINE_INHIBITS_INSULIN_SECRETION	0.443891	1.38488e-05	['CACNA2D2', 'GNGT1', 'CACNA1C', 'CACNA1D', 'CACNB2', 'ADCY5']	['CACNA2D2:+', 'GNGT1:-', 'CACNA1C:-', 'CACNA1D:+', 'CACNB2:+', 'ADCY5:-']
93	REACTOME_INWARDLY_RECTIFYING_K_CHANNELS	0.443495	1.43271e-05	['ABCC8', 'ABCC9', 'GNGT1', 'GABBR2', 'KCNJ16', 'KCNJ6', 'KCNJ15']	['ABCC8:+', 'ABCC9:-', 'GNGT1:-', 'GABBR2:-', 'KCNJ16:-', 'KCNJ6:-', 'KCNJ15:+']
94	REACTOME_POTASSIUM_CHANNELS	0.442853	1.51064e-05	['ABCC8', 'ABCC9', 'KCNN2', 'GNGT1', 'KCNMB4', 'KCNK1', 'GABBR2', 'KCNH1', 'KCNJ16', 'KCNMA1', 'KCNJ6', 'KCNJ15', 'KCNS3', 'KCNK3', 'KCNB2', 'KCNH8', 'KCNQ3', 'KCND2', 'KCNH7', 'KCNQ5']	['ABCC8:+', 'ABCC9:-', 'KCNN2:-', 'GNGT1:-', 'KCNMB4:+', 'KCNK1:-', 'GABBR2:-', 'KCNH1:-', 'KCNJ16:-', 'KCNMA1:-', 'KCNJ6:-', 'KCNJ15:+', 'KCNS3:-', 'KCNK3:+', 'KCNB2:-', 'KCNH8:-', 'KCNQ3:-', 'KCND2:-', 'KCNH7:-', 'KCNQ5:-']
95	REACTOME_SIGNALING_BY_PTK6	0.441679	1.65923e-05	['KHDRBS2', 'EPAS1', 'EREG', 'EGF', 'EGFR', 'NRG1', 'NRG2', 'NRG4', 'BTC', 'ERBB4', 'NRG3', 'LRRK2', 'PTPN1']	['KHDRBS2:+', 'EPAS1:+', 'EREG:-', 'EGF:-', 'EGFR:+', 'NRG1:-', 'NRG2:+', 'NRG4:-', 'BTC:-', 'ERBB4:+', 'NRG3:+', 'LRRK2:-', 'PTPN1:-']
96	KEGG_CHEMOKINE_SIGNALING_PATHWAY	0.439031	2.03908e-05	['CCL2', 'GRK3', 'CCL4', 'CXCL14', 'SHC4', 'CCL20', 'CCL19', 'CCL21', 'CCL23', 'CCL22', 'SHC3', 'GNGT1', 'CX3CL1', 'CXCL11', 'ADCY2', 'CXCL12', 'ADCY8', 'CXCL10', 'PLCB1', 'PRKCB', 'CXCL1', 'ADCY5', 'CXCL8', 'PRKCZ', 'CXCL2', 'CXCL3', 'CXCL9', 'GRK5', 'LYN']	['CCL2:-', 'GRK3:-', 'CCL4:-', 'CXCL14:-', 'SHC4:-', 'CCL20:-', 'CCL19:-', 'CCL21:-', 'CCL23:+', 'CCL22:-', 'SHC3:-', 'GNGT1:-', 'CX3CL1:-', 'CXCL11:-', 'ADCY2:-', 'CXCL12:-', 'ADCY8:+', 'CXCL10:-', 'PLCB1:-', 'PRKCB:-', 'CXCL1:-', 'ADCY5:-', 'CXCL8:-', 'PRKCZ:+', 'CXCL2:-', 'CXCL3:-', 'CXCL9:+', 'GRK5:+', 'LYN:-']
97	WP_REGULATION_OF_ACTIN_CYTOSKELETON	0.435959	2.58185e-05	['RRAS2', 'PIK3C2G', 'PIP5K1B', 'MYH10', 'ITGA1', 'CHRM3', 'CHRM2', 'DIAPH3', 'FN1', 'MYLK', 'PAK3', 'PAK5', 'MAPK4', 'FGF7', 'EGF', 'FGF2', 'FGF1', 'EGFR', 'EZR', 'FGFR2', 'FGF14', 'FGF13', 'FGF12', 'FGF10']	['RRAS2:+', 'PIK3C2G:+', 'PIP5K1B:+', 'MYH10:+', 'ITGA1:+', 'CHRM3:+', 'CHRM2:+', 'DIAPH3:+', 'FN1:-', 'MYLK:+', 'PAK3:-', 'PAK5:+', 'MAPK4:+', 'FGF7:-', 'EGF:-', 'FGF2:-', 'FGF1:-', 'EGFR:+', 'EZR:-', 'FGFR2:-', 'FGF14:-', 'FGF13:-', 'FGF12:+', 'FGF10:+']
98	REACTOME_PHOSPHOLIPID_METABOLISM	0.435539	2.67362e-05	['MGLL', 'ACHE', 'LPIN2', 'BMX', 'PIP5K1B', 'INPP4B', 'PLA2G5', 'SLC44A5', 'GPAT3', 'PIK3C2G', 'OSBPL10', 'PLA1A', 'TNFAIP8', 'LPCAT1', 'PTPN13', 'MFSD2A', 'PLA2G4F', 'TNFAIP8L3', 'PLA2G2A']	['MGLL:+', 'ACHE:-', 'LPIN2:+', 'BMX:-', 'PIP5K1B:+', 'INPP4B:+', 'PLA2G5:-', 'SLC44A5:-', 'GPAT3:+', 'PIK3C2G:+', 'OSBPL10:-', 'PLA1A:+', 'TNFAIP8:-', 'LPCAT1:-', 'PTPN13:-', 'MFSD2A:+', 'PLA2G4F:+', 'TNFAIP8L3:+', 'PLA2G2A:-']
99	REACTOME_PI3K_EVENTS_IN_ERBB4_SIGNALING,REACTOME_SHC1_EVENTS_IN_ERBB4_SIGNALING	0.43536	2.71873e-05	['EREG', 'NRG1', 'NRG2', 'NRG4', 'BTC', 'ERBB4', 'NRG3']	['EREG:-', 'NRG1:-', 'NRG2:+', 'NRG4:-', 'BTC:-', 'ERBB4:+', 'NRG3:+']
100	WP_INITIATION_OF_TRANSCRIPTION_AND_TRANSLATION_ELONGATION_AT_THE_HIV1_LTR	0.435202	2.76033e-05	['NFATC2', 'HDAC9']	['NFATC2:-', 'HDAC9:+']
101	WP_ERBB_SIGNALING_PATHWAY	0.434417	2.93757e-05	['NRG2', 'PAK3', 'PAK5', 'NRG1', 'EREG', 'PRKCB', 'SHC4', 'BTC', 'SHC3', 'MDM2', 'AREG', 'EGF', 'NRG3', 'CAMK2B', 'EGFR', 'ERBB4', 'NRG4', 'MAPK10']	['NRG2:+', 'PAK3:-', 'PAK5:+', 'NRG1:-', 'EREG:-', 'PRKCB:-', 'SHC4:-', 'BTC:-', 'SHC3:-', 'MDM2:-', 'AREG:-', 'EGF:-', 'NRG3:+', 'CAMK2B:-', 'EGFR:+', 'ERBB4:+', 'NRG4:-', 'MAPK10:-']
102	PID_AVB3_INTEGRIN_PATHWAY	0.434256	2.98302e-05	['COL1A2', 'COL5A2', 'COL5A1', 'COL8A1', 'COL6A3', 'COL4A3', 'MFGE8', 'COL10A1', 'FGF2', 'EDIL3', 'COL11A1', 'COL15A1', 'COL4A1', 'COL17A1', 'COL7A1', 'COL1A1', 'SPP1', 'COL4A6', 'COL14A1', 'COL3A1', 'FN1', 'KDR', 'COL12A1', 'COL4A4']	['COL1A2:-', 'COL5A2:-', 'COL5A1:-', 'COL8A1:-', 'COL6A3:-', 'COL4A3:+', 'MFGE8:-', 'COL10A1:-', 'FGF2:-', 'EDIL3:+', 'COL11A1:-', 'COL15A1:-', 'COL4A1:-', 'COL17A1:-', 'COL7A1:-', 'COL1A1:-', 'SPP1:-', 'COL4A6:-', 'COL14A1:-', 'COL3A1:-', 'FN1:-', 'KDR:+', 'COL12A1:-', 'COL4A4:+']
103	REACTOME_TRANSCRIPTIONAL_REGULATION_BY_MECP2	0.433403	3.19007e-05	['CAMK2B', 'RBFOX1', 'MET', 'PPARG', 'BDNF', 'GRIN2A', 'PTPN1', 'NCOR2', 'GRIN2B']	['CAMK2B:-', 'RBFOX1:-', 'MET:-', 'PPARG:+', 'BDNF:+', 'GRIN2A:-', 'PTPN1:-', 'NCOR2:-', 'GRIN2B:+']
104	WP_PEPTIDE_GPCRS	0.432089	3.52946e-05	['TACR1', 'EDNRB', 'ATP8A1', 'AGTR2', 'ACKR1']	['TACR1:-', 'EDNRB:+', 'ATP8A1:+', 'AGTR2:-', 'ACKR1:+']
105	KEGG_ERBB_SIGNALING_PATHWAY	0.431006	3.83708e-05	['PAK3', 'PRKCB', 'BTC', 'NRG1', 'NRG3', 'ERBB4', 'MAPK10', 'NRG2', 'SHC4', 'AREG', 'NRG4', 'EGFR', 'SHC3', 'EGF', 'EREG', 'PAK5', 'CAMK2B']	['PAK3:-', 'PRKCB:-', 'BTC:-', 'NRG1:-', 'NRG3:+', 'ERBB4:+', 'MAPK10:-', 'NRG2:+', 'SHC4:-', 'AREG:-', 'NRG4:-', 'EGFR:+', 'SHC3:-', 'EGF:-', 'EREG:-', 'PAK5:+', 'CAMK2B:-']
106	REACTOME_STIMULI_SENSING_CHANNELS	0.429642	4.25705e-05	['CLCA4', 'ANO2', 'NEDD4L', 'TRPM3', 'NALCN', 'ANO1', 'TRPC4', 'STOML3', 'UNC79', 'ANO3', 'TRPC6', 'CLCA2', 'BEST4', 'ANO4', 'SLC9C2', 'WNK2', 'SCNN1G', 'SCNN1B', 'ASPH', 'RYR2', 'RYR3']	['CLCA4:-', 'ANO2:+', 'NEDD4L:+', 'TRPM3:-', 'NALCN:-', 'ANO1:+', 'TRPC4:-', 'STOML3:-', 'UNC79:-', 'ANO3:-', 'TRPC6:+', 'CLCA2:-', 'BEST4:-', 'ANO4:-', 'SLC9C2:-', 'WNK2:-', 'SCNN1G:-', 'SCNN1B:-', 'ASPH:-', 'RYR2:-', 'RYR3:-']
107	WP_RAS_AND_BRADYKININ_PATHWAYS_IN_COVID19	0.429323	4.37295e-05	['NOS1', 'PRKG1', 'SERPINE1', 'CYP24A1', 'ACE2', 'AGTR2']	['NOS1:+', 'PRKG1:+', 'SERPINE1:-', 'CYP24A1:-', 'ACE2:-', 'AGTR2:-']
108	KEGG_UBIQUITIN_MEDIATED_PROTEOLYSIS	0.429322	4.38814e-05	['KLHL13', 'BIRC3', 'MDM2', 'SMURF1', 'UBE2H', 'NEDD4L', 'RHOBTB2', 'MID1']	['KLHL13:-', 'BIRC3:-', 'MDM2:-', 'SMURF1:-', 'UBE2H:-', 'NEDD4L:+', 'RHOBTB2:-', 'MID1:-']
109	WP_GENES_CONTROLLING_NEPHROGENESIS	0.429318	4.40443e-05	['ROBO2', 'HNF1B', 'SHH', 'SLIT2', 'KDR', 'CXCL12', 'FGFR2', 'WT1', 'EYA1', 'ITGA8', 'CD36']	['ROBO2:+', 'HNF1B:-', 'SHH:-', 'SLIT2:+', 'KDR:+', 'CXCL12:-', 'FGFR2:-', 'WT1:-', 'EYA1:-', 'ITGA8:+', 'CD36:+']
110	REACTOME_MAPK_FAMILY_SIGNALING_CASCADES	0.426521	5.42087e-05	['RASGRF1', 'CAMK2B', 'PRKCQ', 'FGFR2', 'FGF10', 'PAK3', 'MET', 'AREG', 'VWF', 'DUSP16', 'RASGRF2', 'FGF1', 'FN1', 'TEK', 'EREG', 'IL2RA', 'KLB', 'IL6', 'FGF2', 'EGF', 'DUSP6', 'FGF7', 'KSR1', 'MAPK4', 'DUSP10', 'EGFR', 'SHC3', 'NCAM1', 'CNKSR2', 'DLG2', 'GFRA1', 'RASGRP3', 'ANGPT1', 'NRG1', 'KIT', 'NRG2', 'KALRN', 'CSF2', 'MMP10', 'NRG4', 'BCL2L1', 'FGG', 'FGA', 'RASGRP1', 'BTC', 'ERBB4', 'EPGN'…	['RASGRF1:+', 'CAMK2B:-', 'PRKCQ:-', 'FGFR2:-', 'FGF10:+', 'PAK3:-', 'MET:-', 'AREG:-', 'VWF:+', 'DUSP16:-', 'RASGRF2:-', 'FGF1:-', 'FN1:-', 'TEK:+', 'EREG:-', 'IL2RA:-', 'KLB:+', 'IL6:-', 'FGF2:-', 'EGF:-', 'DUSP6:+', 'FGF7:-', 'KSR1:-', 'MAPK4:+', 'DUSP10:-', 'EGFR:+', 'SHC3:-', 'NCAM1:-', 'CNKSR2:-', 'DLG2:-', 'GFRA1:-', 'RASGRP3:+', 'ANGPT1:+', 'NRG1:-', 'KIT:-', 'NRG2:+', 'KALRN:+', 'CSF2:+'…
111	WP_GPCRS_CLASS_A_RHODOPSINLIKE	0.426155	5.5857e-05	['EDNRB', 'CHRM3', 'CHRM2', 'ADRA1A', 'NPFFR2', 'PTGER3', 'PTGFR', 'AGTR2', 'APLNR', 'NMUR2', 'HTR1F', 'F2RL3', 'HRH1', 'GPR39', 'P2RY14']	['EDNRB:+', 'CHRM3:+', 'CHRM2:+', 'ADRA1A:+', 'NPFFR2:+', 'PTGER3:-', 'PTGFR:-', 'AGTR2:-', 'APLNR:-', 'NMUR2:+', 'HTR1F:-', 'F2RL3:-', 'HRH1:-', 'GPR39:-', 'P2RY14:-']
112	REACTOME_SIGNALING_BY_ERBB4	0.424877	6.1477e-05	['CXCL12', 'SPARC', 'EREG', 'APOE', 'YAP1', 'EGF', 'GABRB2', 'EGFR', 'NRG1', 'NRG2', 'NRG4', 'BTC', 'ERBB4', 'GABRG3', 'NRG3']	['CXCL12:-', 'SPARC:-', 'EREG:-', 'APOE:-', 'YAP1:+', 'EGF:-', 'GABRB2:-', 'EGFR:+', 'NRG1:-', 'NRG2:+', 'NRG4:-', 'BTC:-', 'ERBB4:+', 'GABRG3:-', 'NRG3:+']
113	REACTOME_PLATELET_CALCIUM_HOMEOSTASIS	0.424637	6.27674e-05	['ATP2B4', 'ITPR3', 'TRPC6', 'SLC8A1']	['ATP2B4:-', 'ITPR3:+', 'TRPC6:+', 'SLC8A1:+']
114	WP_COMPLEMENT_SYSTEM_IN_NEURONAL_DEVELOPMENT_AND_PLASTICITY	0.423005	7.08217e-05	['TGFB2', 'LLGL2', 'ATP10A', 'CLU', 'CX3CL1', 'SUSD4', 'FCN3', 'MFGE8', 'CSMD1', 'CR2', 'C3', 'PRKCZ', 'ATP11A', 'C4BPA', 'C4BPB', 'C5', 'C6', 'C7', 'COLEC12', 'C9', 'PATJ', 'CD55']	['TGFB2:+', 'LLGL2:+', 'ATP10A:-', 'CLU:-', 'CX3CL1:-', 'SUSD4:-', 'FCN3:+', 'MFGE8:-', 'CSMD1:-', 'CR2:-', 'C3:-', 'PRKCZ:+', 'ATP11A:+', 'C4BPA:+', 'C4BPB:-', 'C5:+', 'C6:-', 'C7:+', 'COLEC12:+', 'C9:+', 'PATJ:+', 'CD55:+']
115	WP_ONCOSTATIN_M_SIGNALING_PATHWAY	0.422489	7.374e-05	['CCL2', 'PRKCB', 'CCN1', 'LIFR', 'SERPINE1', 'TIMP3', 'LDLR', 'MMP1']	['CCL2:-', 'PRKCB:-', 'CCN1:-', 'LIFR:+', 'SERPINE1:-', 'TIMP3:+', 'LDLR:-', 'MMP1:-']
116	REACTOME_TRAFFICKING_OF_AMPA_RECEPTORS	0.422275	7.51362e-05	['CAMK2B', 'CACNG4', 'EPB41L1', 'MDM2', 'GRIA1', 'GRIP1', 'PRKCB', 'MYO6']	['CAMK2B:-', 'CACNG4:-', 'EPB41L1:-', 'MDM2:-', 'GRIA1:+', 'GRIP1:-', 'PRKCB:-', 'MYO6:+']
117	KEGG_GNRH_SIGNALING_PATHWAY	0.421698	7.85699e-05	['ITPR3', 'ADCY2', 'CAMK2B', 'ADCY8', 'PLCB1', 'PRKCB', 'ADCY5', 'MAPK10', 'PLA2G2A', 'CACNA1D', 'PLA2G5', 'CACNA1C', 'EGFR']	['ITPR3:+', 'ADCY2:-', 'CAMK2B:-', 'ADCY8:+', 'PLCB1:-', 'PRKCB:-', 'ADCY5:-', 'MAPK10:-', 'PLA2G2A:-', 'CACNA1D:+', 'PLA2G5:-', 'CACNA1C:-', 'EGFR:+']
118	WP_NOCGMPPKG_MEDIATED_NEUROPROTECTION	0.420158	8.79539e-05	['PDE3A', 'NOS1', 'GRIN2B', 'CAMK2B', 'GRIN2A', 'GUCY1A2']	['PDE3A:-', 'NOS1:+', 'GRIN2B:+', 'CAMK2B:-', 'GRIN2A:-', 'GUCY1A2:+']
119	REACTOME_ONCOGENIC_MAPK_SIGNALING	0.418308	0.000100566	['CAMK2B', 'VWF', 'DUSP16', 'FN1', 'DUSP6', 'KSR1', 'DUSP10', 'CNKSR2', 'FGG', 'FGA', 'SPRED2']	['CAMK2B:-', 'VWF:+', 'DUSP16:-', 'FN1:-', 'DUSP6:+', 'KSR1:-', 'DUSP10:-', 'CNKSR2:-', 'FGG:+', 'FGA:-', 'SPRED2:+']
120	REACTOME_TRANSPORT_OF_SMALL_MOLECULES	0.417513	0.000106714	['CFTR', 'SLC7A2', 'CLCA4', 'CP', 'ANO2', 'NEDD4L', 'CAMK2B', 'ATP2B4', 'ATP2C2', 'SLC12A2', 'ATP11A', 'ABCC9', 'ATP12A', 'ADCY2', 'SLC4A4', 'TRPM3', 'ABCB1', 'FTL', 'SLC26A4', 'PCSK5', 'SLC5A1', 'HMOX1', 'LIPG', 'NALCN', 'SLC5A5', 'SLC1A1', 'ABCC3', 'SLC1A2', 'SLC16A10', 'ATP10B', 'ATP8A1', 'ABCC4', 'ATP13A4', 'GNGT1', 'LDLR', 'APOE', 'ANO1', 'ATP8A2', 'TRPC4', 'STOML3', 'UNC79', 'ANO3', 'TRPC6'…	['CFTR:+', 'SLC7A2:-', 'CLCA4:-', 'CP:-', 'ANO2:+', 'NEDD4L:+', 'CAMK2B:-', 'ATP2B4:-', 'ATP2C2:+', 'SLC12A2:-', 'ATP11A:+', 'ABCC9:-', 'ATP12A:-', 'ADCY2:-', 'SLC4A4:-', 'TRPM3:-', 'ABCB1:-', 'FTL:-', 'SLC26A4:-', 'PCSK5:-', 'SLC5A1:-', 'HMOX1:+', 'LIPG:-', 'NALCN:-', 'SLC5A5:-', 'SLC1A1:-', 'ABCC3:-', 'SLC1A2:-', 'SLC16A10:-', 'ATP10B:-', 'ATP8A1:+', 'ABCC4:+', 'ATP13A4:+', 'GNGT1:-', 'LDLR:-',…
121	WP_RAS_SIGNALING	0.416007	0.000118961	['GNGT1', 'BCL2L1', 'PLA1A', 'SHC4', 'RRAS2', 'PLA2G4F', 'INSR', 'PLA2G2A', 'MET', 'PLA2G5', 'KIT', 'FLT1', 'RAPGEF5', 'KDR', 'NTRK2', 'MAPK10', 'RASGRP1', 'PAK3', 'PAK5', 'RASGRP3', 'KSR1', 'PRKCB', 'GRIN2B', 'GRIN2A', 'TEK', 'SHC3', 'EGFR', 'FGFR2', 'RASGRF1', 'RASGRF2']	['GNGT1:-', 'BCL2L1:-', 'PLA1A:+', 'SHC4:-', 'RRAS2:+', 'PLA2G4F:+', 'INSR:-', 'PLA2G2A:-', 'MET:-', 'PLA2G5:-', 'KIT:-', 'FLT1:+', 'RAPGEF5:+', 'KDR:+', 'NTRK2:+', 'MAPK10:-', 'RASGRP1:-', 'PAK3:-', 'PAK5:+', 'RASGRP3:+', 'KSR1:-', 'PRKCB:-', 'GRIN2B:+', 'GRIN2A:-', 'TEK:+', 'SHC3:-', 'EGFR:+', 'FGFR2:-', 'RASGRF1:+', 'RASGRF2:-']
122	REACTOME_RAC1_GTPASE_CYCLE	0.415792	0.000121184	['BAIAP2L1', 'ARHGAP44', 'PAK3', 'DOCK3', 'PAK5', 'CAV1', 'RASGRF2', 'WIPF3', 'CIT', 'FAM13A', 'DIAPH3', 'DOCK5', 'MPP7', 'KALRN', 'DLC1', 'ARHGAP12', 'ARHGAP42', 'NHS', 'SRGAP3']	['BAIAP2L1:-', 'ARHGAP44:+', 'PAK3:-', 'DOCK3:-', 'PAK5:+', 'CAV1:-', 'RASGRF2:-', 'WIPF3:-', 'CIT:-', 'FAM13A:-', 'DIAPH3:+', 'DOCK5:-', 'MPP7:-', 'KALRN:+', 'DLC1:+', 'ARHGAP12:+', 'ARHGAP42:-', 'NHS:-', 'SRGAP3:-']
123	WP_TGFBETA_RECEPTOR_SIGNALING	0.415035	0.000128188	['LTBP1', 'SMAD6', 'THBS1', 'ITGB6', 'LEF1', 'SPP1', 'EGF', 'LIF', 'SERPINE1', 'SMAD3', 'RUNX2', 'INHBA']	['LTBP1:-', 'SMAD6:+', 'THBS1:-', 'ITGB6:-', 'LEF1:-', 'SPP1:-', 'EGF:-', 'LIF:-', 'SERPINE1:-', 'SMAD3:-', 'RUNX2:-', 'INHBA:-']
124	REACTOME_DISEASES_OF_GLYCOSYLATION	0.411985	0.000158716	['THSD7A', 'VCAN', 'ADAMTS6', 'GPC4', 'PGM1', 'SEMA5A', 'MUC5B', 'SDC4', 'ADAMTS8', 'THBS1', 'ADAMTS14', 'LUM', 'ADAMTS17', 'ADAMTS18', 'THSD7B', 'MUC4', 'ADAMTS16', 'GPC3', 'ADAMTS12', 'ADAMTS5', 'ADAMTS3', 'ADAMTSL3', 'ACAN', 'ADAMTS9', 'MUC13', 'ADAMTSL1', 'GPC5', 'MUC16', 'EXT1', 'BGN', 'GPC6', 'MUC6', 'THBS2', 'THSD4', 'PRELP', 'ADAMTSL2', 'PAPSS2', 'MUC5AC', 'SPON1']	['THSD7A:-', 'VCAN:-', 'ADAMTS6:-', 'GPC4:-', 'PGM1:-', 'SEMA5A:+', 'MUC5B:-', 'SDC4:-', 'ADAMTS8:+', 'THBS1:-', 'ADAMTS14:-', 'LUM:-', 'ADAMTS17:+', 'ADAMTS18:-', 'THSD7B:-', 'MUC4:-', 'ADAMTS16:-', 'GPC3:+', 'ADAMTS12:-', 'ADAMTS5:-', 'ADAMTS3:-', 'ADAMTSL3:+', 'ACAN:+', 'ADAMTS9:-', 'MUC13:-', 'ADAMTSL1:-', 'GPC5:-', 'MUC16:-', 'EXT1:+', 'BGN:-', 'GPC6:-', 'MUC6:+', 'THBS2:-', 'THSD4:-', 'PREL…
125	REACTOME_DISEASES_ASSOCIATED_WITH_GLYCOSAMINOGLYCAN_METABOLISM	0.409822	0.000184581	['VCAN', 'GPC4', 'SDC4', 'LUM', 'GPC3', 'ACAN', 'GPC5', 'EXT1', 'BGN', 'GPC6', 'PRELP', 'PAPSS2']	['VCAN:-', 'GPC4:-', 'SDC4:-', 'LUM:-', 'GPC3:+', 'ACAN:+', 'GPC5:-', 'EXT1:+', 'BGN:-', 'GPC6:-', 'PRELP:+', 'PAPSS2:+']
126	PID_SYNDECAN_4_PATHWAY	0.409644	0.000187499	['FGF2', 'MMP9', 'ADAM12', 'THBS1', 'FN1', 'TNC', 'LAMA3', 'SDC4', 'CXCL12']	['FGF2:-', 'MMP9:-', 'ADAM12:-', 'THBS1:-', 'FN1:-', 'TNC:-', 'LAMA3:+', 'SDC4:-', 'CXCL12:-']
127	WP_MAMMARY_GLAND_DEVELOPMENT_PATHWAY_PREGNANCY_AND_LACTATION_STAGE_3_OF_4	0.408558	0.000202511	['PRLR', 'BCL2L1', 'ATP2C2', 'CAV1', 'EGFR', 'PTPN1', 'ESR2', 'ERBB4']	['PRLR:+', 'BCL2L1:-', 'ATP2C2:+', 'CAV1:-', 'EGFR:+', 'PTPN1:-', 'ESR2:-', 'ERBB4:+']
128	REACTOME_O_GLYCOSYLATION_OF_TSR_DOMAIN_CONTAINING_PROTEINS	0.407286	0.00022141	['THSD7A', 'ADAMTS6', 'SEMA5A', 'ADAMTS8', 'THBS1', 'ADAMTS14', 'ADAMTS17', 'ADAMTS18', 'THSD7B', 'ADAMTS16', 'ADAMTS12', 'ADAMTS5', 'ADAMTS3', 'ADAMTSL3', 'ADAMTS9', 'ADAMTSL1', 'THBS2', 'THSD4', 'ADAMTSL2', 'SPON1']	['THSD7A:-', 'ADAMTS6:-', 'SEMA5A:+', 'ADAMTS8:+', 'THBS1:-', 'ADAMTS14:-', 'ADAMTS17:+', 'ADAMTS18:-', 'THSD7B:-', 'ADAMTS16:-', 'ADAMTS12:-', 'ADAMTS5:-', 'ADAMTS3:-', 'ADAMTSL3:+', 'ADAMTS9:-', 'ADAMTSL1:-', 'THBS2:-', 'THSD4:-', 'ADAMTSL2:-', 'SPON1:-']
129	WP_TGFBETA_SIGNALING_PATHWAY	0.406516	0.000233986	['NEDD4L', 'YAP1', 'THBS1', 'TNC', 'NEDD9', 'MET', 'SMAD3', 'ITGA2', 'FN1', 'MAPK4', 'SMURF1', 'FOSB', 'COL1A2', 'CAV1', 'RUNX2', 'MMP1']	['NEDD4L:+', 'YAP1:+', 'THBS1:-', 'TNC:-', 'NEDD9:-', 'MET:-', 'SMAD3:-', 'ITGA2:-', 'FN1:-', 'MAPK4:+', 'SMURF1:-', 'FOSB:-', 'COL1A2:-', 'CAV1:-', 'RUNX2:-', 'MMP1:-']
130	REACTOME_TRANSMISSION_ACROSS_CHEMICAL_SYNAPSES	0.406006	0.000242984	['CACNA2D2', 'RASGRF1', 'CAMK2B', 'SYT1', 'CACNG4', 'ADCY2', 'RIMS1', 'ACHE', 'EPB41L1', 'NCALD', 'SLC1A1', 'APBA1', 'SLC6A4', 'SLC1A2', 'LIN7A', 'RASGRF2', 'GLS', 'GNGT1', 'SNAP25', 'MDM2', 'GABBR2', 'PPFIA2', 'CACNA1A', 'GABRB2', 'CACNA1B', 'GRIK4', 'DLG2', 'KCNJ16', 'GRIA1', 'ADCY8', 'GRIP1', 'SYN2', 'NRG1', 'CACNA2D3', 'KCNJ6', 'KCNJ15', 'GRIK2', 'CACNB2', 'PRKCB', 'NBEA', 'ADCY5', 'PPM1E', '…	['CACNA2D2:+', 'RASGRF1:+', 'CAMK2B:-', 'SYT1:-', 'CACNG4:-', 'ADCY2:-', 'RIMS1:+', 'ACHE:-', 'EPB41L1:-', 'NCALD:+', 'SLC1A1:-', 'APBA1:-', 'SLC6A4:+', 'SLC1A2:-', 'LIN7A:+', 'RASGRF2:-', 'GLS:+', 'GNGT1:-', 'SNAP25:-', 'MDM2:-', 'GABBR2:-', 'PPFIA2:-', 'CACNA1A:-', 'GABRB2:-', 'CACNA1B:-', 'GRIK4:+', 'DLG2:-', 'KCNJ16:-', 'GRIA1:+', 'ADCY8:+', 'GRIP1:-', 'SYN2:+', 'NRG1:-', 'CACNA2D3:+', 'KCNJ6…
131	REACTOME_METABOLISM_OF_FAT_SOLUBLE_VITAMINS	0.405743	0.000248198	['GPC4', 'LRP2', 'SDC4', 'LDLR', 'APOE', 'GPC3', 'GPC5', 'GPC6', 'AKR1C1']	['GPC4:-', 'LRP2:+', 'SDC4:-', 'LDLR:-', 'APOE:-', 'GPC3:+', 'GPC5:-', 'GPC6:-', 'AKR1C1:-']
132	REACTOME_NERVOUS_SYSTEM_DEVELOPMENT	0.404446	0.000271557	['CNTN1', 'EPHA3', 'NTN1', 'PRKCQ', 'NTN4', 'SEMA3A', 'PAK3', 'EPHA6', 'COL5A3', 'COL4A4', 'NRCAM', 'LAMB1', 'SEMA6A', 'EZR', 'MMP9', 'PAK5', 'MYH14', 'MET', 'SH3GL2', 'CXCL12', 'CAP2', 'ADGRG6', 'SEMA5A', 'ST8SIA4', 'DPYSL3', 'EPHA4', 'NRP2', 'EFNB2', 'FLRT3', 'COL5A1', 'MYH10', 'TRPC4', 'EPHB2', 'MYH11', 'CNTN6', 'CHL1', 'COL4A2', 'EPHA7', 'SCN2A', 'SCN7A', 'TRPC6', 'YAP1', 'SEMA6D', 'SCN1A', '…	['CNTN1:+', 'EPHA3:-', 'NTN1:-', 'PRKCQ:-', 'NTN4:+', 'SEMA3A:-', 'PAK3:-', 'EPHA6:+', 'COL5A3:-', 'COL4A4:+', 'NRCAM:-', 'LAMB1:-', 'SEMA6A:+', 'EZR:-', 'MMP9:-', 'PAK5:+', 'MYH14:-', 'MET:-', 'SH3GL2:+', 'CXCL12:-', 'CAP2:-', 'ADGRG6:+', 'SEMA5A:+', 'ST8SIA4:-', 'DPYSL3:-', 'EPHA4:-', 'NRP2:-', 'EFNB2:+', 'FLRT3:+', 'COL5A1:-', 'MYH10:+', 'TRPC4:-', 'EPHB2:-', 'MYH11:-', 'CNTN6:+', 'CHL1:-', 'C…
133	REACTOME_ANTIGEN_PROCESSING_UBIQUITINATION_PROTEASOME_DEGRADATION	0.401121	0.00033923	['KLHL13', 'ASB4', 'NEDD4L', 'LMO7', 'HECW2', 'FBXO15', 'FBXO32', 'FBXL13', 'SPSB1', 'UBE2H', 'SMURF1', 'ASB14']	['KLHL13:-', 'ASB4:+', 'NEDD4L:+', 'LMO7:+', 'HECW2:+', 'FBXO15:-', 'FBXO32:-', 'FBXL13:-', 'SPSB1:-', 'UBE2H:-', 'SMURF1:-', 'ASB14:-']
134	REACTOME_TERMINATION_OF_O_GLYCAN_BIOSYNTHESIS	0.401079	0.000341432	['ST6GAL1', 'MUC5B', 'MUC4', 'MUC13', 'MUC16', 'ST6GALNAC3', 'MUC6', 'MUC5AC']	['ST6GAL1:-', 'MUC5B:-', 'MUC4:-', 'MUC13:-', 'MUC16:-', 'ST6GALNAC3:-', 'MUC6:+', 'MUC5AC:-']
135	PID_PDGFRB_PATHWAY	0.400662	0.000352171	['MYOCD', 'PAG1', 'MAPK10', 'EPS8', 'ACTA2', 'PTPN1', 'SFN', 'PTPRJ', 'PPP2R2B', 'BLK', 'TAGLN', 'KSR1', 'LYN']	['MYOCD:-', 'PAG1:+', 'MAPK10:-', 'EPS8:-', 'ACTA2:-', 'PTPN1:-', 'SFN:-', 'PTPRJ:+', 'PPP2R2B:-', 'BLK:-', 'TAGLN:-', 'KSR1:-', 'LYN:-']
136	REACTOME_TERMINAL_PATHWAY_OF_COMPLEMENT	0.399079	0.000391801	['C6', 'C5', 'C7', 'C9', 'CLU']	['C6:-', 'C5:+', 'C7:+', 'C9:+', 'CLU:-']
137	REACTOME_SYNAPTIC_ADHESION_LIKE_MOLECULES	0.398334	0.000412676	['PTPRD', 'GRIA1', 'GRIN2A', 'GRIN2B']	['PTPRD:-', 'GRIA1:+', 'GRIN2A:-', 'GRIN2B:+']
138	KEGG_ABC_TRANSPORTERS	0.396109	0.000477871	['ABCA1', 'ABCA3', 'ABCC3', 'ABCC9', 'ABCC4', 'ABCA12', 'CFTR', 'ABCB1', 'ABCA4', 'ABCC8', 'ABCA13']	['ABCA1:+', 'ABCA3:+', 'ABCC3:-', 'ABCC9:-', 'ABCC4:+', 'ABCA12:-', 'CFTR:+', 'ABCB1:-', 'ABCA4:-', 'ABCC8:+', 'ABCA13:-']
139	REACTOME_PI3K_AKT_SIGNALING_IN_CANCER	0.396082	0.000480532	['FGFR2', 'FGF10', 'MET', 'AREG', 'FGF1', 'EREG', 'KLB', 'MDM2', 'FGF2', 'EGF', 'ESR2', 'FGF7', 'EGFR', 'NRG1', 'KIT', 'NRG2', 'NRG4', 'BTC', 'ERBB4', 'EPGN', 'NRG3']	['FGFR2:-', 'FGF10:+', 'MET:-', 'AREG:-', 'FGF1:-', 'EREG:-', 'KLB:+', 'MDM2:-', 'FGF2:-', 'EGF:-', 'ESR2:-', 'FGF7:-', 'EGFR:+', 'NRG1:-', 'KIT:-', 'NRG2:+', 'NRG4:-', 'BTC:-', 'ERBB4:+', 'EPGN:-', 'NRG3:+']
140	REACTOME_KERATINIZATION,REACTOME_FORMATION_OF_THE_CORNIFIED_ENVELOPE	0.395869	0.000488976	['KRT18', 'KRT17', 'SPINK5', 'DSG3', 'KRT7', 'PCSK6', 'TCHH', 'KRT80', 'KRT19', 'KRT15', 'KRT13', 'KRT5', 'KRT14', 'KAZN', 'KRT6A']	['KRT18:-', 'KRT17:-', 'SPINK5:-', 'DSG3:-', 'KRT7:-', 'PCSK6:+', 'TCHH:-', 'KRT80:-', 'KRT19:-', 'KRT15:-', 'KRT13:-', 'KRT5:-', 'KRT14:-', 'KAZN:-', 'KRT6A:-']
141	REACTOME_NEGATIVE_REGULATION_OF_THE_PI3K_AKT_NETWORK	0.3949	0.000522093	['FGFR2', 'FGF10', 'MET', 'PIP5K1B', 'AREG', 'FGF1', 'EREG', 'KLB', 'FGF2', 'EGF', 'ESR2', 'FGF7', 'EGFR', 'NRG1', 'KIT', 'NRG2', 'NRG4', 'INSR', 'BTC', 'ERBB4', 'EPGN', 'NRG3']	['FGFR2:-', 'FGF10:+', 'MET:-', 'PIP5K1B:+', 'AREG:-', 'FGF1:-', 'EREG:-', 'KLB:+', 'FGF2:-', 'EGF:-', 'ESR2:-', 'FGF7:-', 'EGFR:+', 'NRG1:-', 'KIT:-', 'NRG2:+', 'NRG4:-', 'INSR:-', 'BTC:-', 'ERBB4:+', 'EPGN:-', 'NRG3:+']
142	REACTOME_G_ALPHA_S_SIGNALLING_EVENTS	0.394759	0.000528825	['CALCRL', 'ADCY2', 'SCTR', 'PTHLH', 'GRK3', 'VIPR2', 'PDE10A', 'PDE4D', 'PDE1A', 'RAMP3', 'GNGT1', 'ADCY8', 'GPR176', 'PDE7B', 'PDE3A', 'ADCY5', 'GPR39', 'GRK5']	['CALCRL:+', 'ADCY2:-', 'SCTR:-', 'PTHLH:-', 'GRK3:-', 'VIPR2:-', 'PDE10A:-', 'PDE4D:+', 'PDE1A:-', 'RAMP3:+', 'GNGT1:-', 'ADCY8:+', 'GPR176:-', 'PDE7B:-', 'PDE3A:-', 'ADCY5:-', 'GPR39:-', 'GRK5:+']
143	WP_SARSCOV2_INNATE_IMMUNITY_EVASION_AND_CELLSPECIFIC_IMMUNE_RESPONSE	0.393446	0.000576911	['CCL4', 'CCL2', 'IL6', 'CXCL1', 'CXCL11', 'CSF2', 'CXCL3', 'CXCL2', 'CXCL8', 'CXCL9', 'SMAD3', 'CXCL12', 'ACE2', 'CXCL10']	['CCL4:-', 'CCL2:-', 'IL6:-', 'CXCL1:-', 'CXCL11:-', 'CSF2:+', 'CXCL3:-', 'CXCL2:-', 'CXCL8:-', 'CXCL9:+', 'SMAD3:-', 'CXCL12:-', 'ACE2:-', 'CXCL10:-']
144	REACTOME_CONSTITUTIVE_SIGNALING_BY_ABERRANT_PI3K_IN_CANCER	0.39329	0.000584867	['FGFR2', 'FGF10', 'MET', 'AREG', 'FGF1', 'EREG', 'KLB', 'FGF2', 'EGF', 'ESR2', 'FGF7', 'EGFR', 'NRG1', 'KIT', 'NRG2', 'NRG4', 'BTC', 'ERBB4', 'EPGN', 'NRG3']	['FGFR2:-', 'FGF10:+', 'MET:-', 'AREG:-', 'FGF1:-', 'EREG:-', 'KLB:+', 'FGF2:-', 'EGF:-', 'ESR2:-', 'FGF7:-', 'EGFR:+', 'NRG1:-', 'KIT:-', 'NRG2:+', 'NRG4:-', 'BTC:-', 'ERBB4:+', 'EPGN:-', 'NRG3:+']
145	REACTOME_CLASS_I_MHC_MEDIATED_ANTIGEN_PROCESSING_PRESENTATION	0.393178	0.000591337	['KLHL13', 'ASB4', 'NEDD4L', 'CD36', 'LMO7', 'CTSV', 'HECW2', 'FBXO15', 'FBXO32', 'FBXL13', 'FGG', 'FGA', 'SPSB1', 'UBE2H', 'SMURF1', 'ASB14']	['KLHL13:-', 'ASB4:+', 'NEDD4L:+', 'CD36:+', 'LMO7:+', 'CTSV:-', 'HECW2:+', 'FBXO15:-', 'FBXO32:-', 'FBXL13:-', 'FGG:+', 'FGA:-', 'SPSB1:-', 'UBE2H:-', 'SMURF1:-', 'ASB14:-']
146	WP_7Q1123_COPY_NUMBER_VARIATION_SYNDROME	0.392771	0.000609062	['NRG1', 'CLDN1', 'GRIP1', 'FBN1', 'ACACA', 'CLDN5', 'PRKG1', 'GTF2IRD1', 'ELN', 'SQSTM1', 'SNAP25']	['NRG1:-', 'CLDN1:-', 'GRIP1:-', 'FBN1:-', 'ACACA:+', 'CLDN5:-', 'PRKG1:+', 'GTF2IRD1:-', 'ELN:-', 'SQSTM1:+', 'SNAP25:-']
147	REACTOME_COLLAGEN_BIOSYNTHESIS_AND_MODIFYING_ENZYMES	0.391367	0.000667772	['TLL1', 'COL23A1', 'COL11A1', 'COL17A1', 'COL5A3', 'COL4A4', 'P3H2', 'COL1A1', 'COL12A1', 'COL7A1', 'COL10A1', 'COL21A1', 'COL5A1', 'COL4A2', 'ADAMTS14', 'COL8A1', 'PLOD2', 'ADAMTS3', 'COL6A3', 'COL1A2', 'BMP1', 'COL3A1', 'COL4A3', 'COL22A1', 'COL24A1', 'COL4A1', 'COL14A1', 'COL25A1', 'COL27A1', 'COL4A6', 'COL5A2', 'COL15A1', 'COL6A6', 'COL28A1']	['TLL1:+', 'COL23A1:-', 'COL11A1:-', 'COL17A1:-', 'COL5A3:-', 'COL4A4:+', 'P3H2:+', 'COL1A1:-', 'COL12A1:-', 'COL7A1:-', 'COL10A1:-', 'COL21A1:-', 'COL5A1:-', 'COL4A2:-', 'ADAMTS14:-', 'COL8A1:-', 'PLOD2:-', 'ADAMTS3:-', 'COL6A3:-', 'COL1A2:-', 'BMP1:-', 'COL3A1:-', 'COL4A3:+', 'COL22A1:-', 'COL24A1:-', 'COL4A1:-', 'COL14A1:-', 'COL25A1:-', 'COL27A1:-', 'COL4A6:-', 'COL5A2:-', 'COL15A1:-', 'COL6A…
148	REACTOME_VISUAL_PHOTOTRANSDUCTION	0.388847	0.000784159	['PRKCQ', 'DHRS9', 'GPC4', 'LRP2', 'SDC4', 'GNGT1', 'LDLR', 'APOE', 'GPC3', 'GPC5', 'GPC6', 'AKR1C1', 'ABCA4']	['PRKCQ:-', 'DHRS9:-', 'GPC4:-', 'LRP2:+', 'SDC4:-', 'GNGT1:-', 'LDLR:-', 'APOE:-', 'GPC3:+', 'GPC5:-', 'GPC6:-', 'AKR1C1:-', 'ABCA4:-']
149	WP_AMPACTIVATED_PROTEIN_KINASE_AMPK_SIGNALING	0.388676	0.000795632	['HNF4A', 'INSR', 'CCNA1', 'ACACA', 'PLCB1', 'ADRA1A']	['HNF4A:-', 'INSR:-', 'CCNA1:-', 'ACACA:+', 'PLCB1:-', 'ADRA1A:+']
150	WP_MESODERMAL_COMMITMENT_PATHWAY	0.388097	0.000827885	['HMGA2', 'YAP1', 'DDAH1', 'TRIM5', 'TOX', 'ACACA', 'SMAD3', 'TBX1', 'TOX3', 'SMAD6', 'PLCH1', 'TCF7L1', 'EPB41L5', 'GRHL2', 'HNF4A', 'LEF1', 'KLF5', 'EXT1', 'PBX3', 'INHBA']	['HMGA2:-', 'YAP1:+', 'DDAH1:-', 'TRIM5:-', 'TOX:+', 'ACACA:+', 'SMAD3:-', 'TBX1:-', 'TOX3:-', 'SMAD6:+', 'PLCH1:+', 'TCF7L1:-', 'EPB41L5:+', 'GRHL2:-', 'HNF4A:-', 'LEF1:-', 'KLF5:-', 'EXT1:+', 'PBX3:-', 'INHBA:-']
151	WP_ENDOTHELIN_PATHWAYS	0.38774	0.000849673	['CNN1', 'EDNRB', 'PLCB1', 'ADRA1A', 'EDN1', 'CALCRL', 'MYLK']	['CNN1:-', 'EDNRB:+', 'PLCB1:-', 'ADRA1A:+', 'EDN1:-', 'CALCRL:+', 'MYLK:+']
152	WP_MAMMARY_GLAND_DEVELOPMENT_PATHWAY_EMBRYONIC_DEVELOPMENT_STAGE_1_OF_4	0.387386	0.000871861	['SFRP1', 'ERBB4', 'NRG3', 'ALPL', 'CDH1', 'ITGA6']	['SFRP1:-', 'ERBB4:+', 'NRG3:+', 'ALPL:-', 'CDH1:-', 'ITGA6:-']
153	REACTOME_CHONDROITIN_SULFATE_BIOSYNTHESIS	0.386698	0.000913089	['VCAN', 'CHST9', 'BGN', 'CHSY3']	['VCAN:-', 'CHST9:-', 'BGN:-', 'CHSY3:-']
154	PID_IL4_2PATHWAY	0.385379	0.000993668	['COL1A1', 'ALOX15', 'IRF4', 'IL13RA2', 'TFF3', 'PIGR', 'COL1A2', 'BCL2L1']	['COL1A1:-', 'ALOX15:-', 'IRF4:-', 'IL13RA2:-', 'TFF3:-', 'PIGR:-', 'COL1A2:-', 'BCL2L1:-']
155	WP_AMYOTROPHIC_LATERAL_SCLEROSIS_ALS	0.385286	0.00100333	['GRIA1', 'BCL2L1', 'NOS1', 'SLC1A2', 'CAT']	['GRIA1:+', 'BCL2L1:-', 'NOS1:+', 'SLC1A2:-', 'CAT:+']
156	REACTOME_INTRACELLULAR_SIGNALING_BY_SECOND_MESSENGERS	0.384946	0.00102849	['CAMK2B', 'FGFR2', 'FGF10', 'ADCY2', 'MECOM', 'ITPR3', 'MET', 'PIP5K1B', 'AREG', 'FRK', 'FGF1', 'PDE1A', 'EREG', 'PPARG', 'KLB', 'MDM2', 'FGF2', 'EGF', 'ESR2', 'FGF7', 'EGFR', 'PDE1C', 'ADCY8', 'NRG1', 'KIT', 'NRG2', 'NRG4', 'INSR', 'NBEA', 'ADCY5', 'BTC', 'ERBB4', 'EPGN', 'NRG3']	['CAMK2B:-', 'FGFR2:-', 'FGF10:+', 'ADCY2:-', 'MECOM:-', 'ITPR3:+', 'MET:-', 'PIP5K1B:+', 'AREG:-', 'FRK:-', 'FGF1:-', 'PDE1A:-', 'EREG:-', 'PPARG:+', 'KLB:+', 'MDM2:-', 'FGF2:-', 'EGF:-', 'ESR2:-', 'FGF7:-', 'EGFR:+', 'PDE1C:+', 'ADCY8:+', 'NRG1:-', 'KIT:-', 'NRG2:+', 'NRG4:-', 'INSR:-', 'NBEA:-', 'ADCY5:-', 'BTC:-', 'ERBB4:+', 'EPGN:-', 'NRG3:+']
157	WP_CHEMOKINE_SIGNALING_PATHWAY	0.381872	0.00124298	['CCL4', 'GNGT1', 'ADCY5', 'ADCY8', 'SHC4', 'CCL20', 'CCL19', 'CCL21', 'LYN', 'CCL22', 'CXCL11', 'CX3CL1', 'CXCL12', 'CXCL14', 'PRKCB', 'GRK5', 'PRKCZ', 'SHC3', 'CXCL3', 'CXCL9', 'PLCB1', 'ADCY2', 'CXCL10']	['CCL4:-', 'GNGT1:-', 'ADCY5:-', 'ADCY8:+', 'SHC4:-', 'CCL20:-', 'CCL19:-', 'CCL21:-', 'LYN:-', 'CCL22:-', 'CXCL11:-', 'CX3CL1:-', 'CXCL12:-', 'CXCL14:-', 'PRKCB:-', 'GRK5:+', 'PRKCZ:+', 'SHC3:-', 'CXCL3:-', 'CXCL9:+', 'PLCB1:-', 'ADCY2:-', 'CXCL10:-']
158	REACTOME_COLLAGEN_DEGRADATION	0.38141	0.00128307	['COL23A1', 'COL11A1', 'COL17A1', 'COL5A3', 'COL4A4', 'MMP11', 'MMP9', 'COL1A1', 'COL12A1', 'COL7A1', 'MMP19', 'COL10A1', 'COL5A1', 'COL4A2', 'MMP7', 'COL8A1', 'COL6A3', 'COL1A2', 'MMP10', 'COL3A1', 'COL4A3', 'COL4A1', 'COL14A1', 'COL25A1', 'MMP1', 'COL4A6', 'COL5A2', 'COL15A1', 'COL6A6']	['COL23A1:-', 'COL11A1:-', 'COL17A1:-', 'COL5A3:-', 'COL4A4:+', 'MMP11:-', 'MMP9:-', 'COL1A1:-', 'COL12A1:-', 'COL7A1:-', 'MMP19:-', 'COL10A1:-', 'COL5A1:-', 'COL4A2:-', 'MMP7:-', 'COL8A1:-', 'COL6A3:-', 'COL1A2:-', 'MMP10:-', 'COL3A1:-', 'COL4A3:+', 'COL4A1:-', 'COL14A1:-', 'COL25A1:-', 'MMP1:-', 'COL4A6:-', 'COL5A2:-', 'COL15A1:-', 'COL6A6:+']
159	WP_SPLICING_FACTOR_NOVA_REGULATED_SYNAPTIC_PROTEINS	0.377612	0.00161318	['CADM1', 'GABBR2', 'CDH2', 'NTNG1', 'CHL1', 'GRIN2B', 'KCNMA1', 'MAPK4', 'EPB41L3', 'PRKCZ', 'ANK3', 'GRIK2', 'EPB41L1', 'KCNJ6', 'EFNA5']	['CADM1:+', 'GABBR2:-', 'CDH2:-', 'NTNG1:+', 'CHL1:-', 'GRIN2B:+', 'KCNMA1:-', 'MAPK4:+', 'EPB41L3:+', 'PRKCZ:+', 'ANK3:+', 'GRIK2:-', 'EPB41L1:-', 'KCNJ6:-', 'EFNA5:-']
160	REACTOME_CGMP_EFFECTS	0.377137	0.0016656	['IRAG1', 'PDE10A', 'PDE1A', 'KCNMB4', 'KCNMA1', 'PRKG1']	['IRAG1:-', 'PDE10A:-', 'PDE1A:-', 'KCNMB4:+', 'KCNMA1:-', 'PRKG1:+']
161	BIOCARTA_ERBB4_PATHWAY	0.376969	0.001689	['NRG3', 'ERBB4', 'NRG2', 'PRKCB']	['NRG3:+', 'ERBB4:+', 'NRG2:+', 'PRKCB:-']
162	REACTOME_GLYCEROPHOSPHOLIPID_BIOSYNTHESIS	0.376039	0.00179073	['MGLL', 'ACHE', 'LPIN2', 'PLA2G5', 'SLC44A5', 'GPAT3', 'OSBPL10', 'PLA1A', 'LPCAT1', 'MFSD2A', 'PLA2G4F', 'PLA2G2A']	['MGLL:+', 'ACHE:-', 'LPIN2:+', 'PLA2G5:-', 'SLC44A5:-', 'GPAT3:+', 'OSBPL10:-', 'PLA1A:+', 'LPCAT1:-', 'MFSD2A:+', 'PLA2G4F:+', 'PLA2G2A:-']
163	REACTOME_FATTY_ACYL_COA_BIOSYNTHESIS	0.375158	0.0018926	['ELOVL5', 'ACSL4', 'SCD', 'SCD5', 'ELOVL6', 'ACACA']	['ELOVL5:-', 'ACSL4:-', 'SCD:+', 'SCD5:-', 'ELOVL6:-', 'ACACA:+']
164	REACTOME_ROBO_RECEPTORS_BIND_AKAP5	0.374206	0.0020082	['ROBO2']	['ROBO2:+']
165	NABA_PROTEOGLYCANS	0.372046	0.00228291	['ACAN', 'BGN', 'ESM1', 'HAPLN1', 'LUM', 'PRELP', 'PRG4', 'SPOCK1', 'SPOCK3', 'VCAN']	['ACAN:+', 'BGN:-', 'ESM1:-', 'HAPLN1:+', 'LUM:-', 'PRELP:+', 'PRG4:-', 'SPOCK1:-', 'SPOCK3:-', 'VCAN:-']
166	NABA_ECM_GLYCOPROTEINS	0.371781	0.00232759	['ABI3BP', 'BMPER', 'CILP', 'COMP', 'CRIM1', 'CRISPLD1', 'CRISPLD2', 'CCN2', 'CCN1', 'DMBT1', 'EDIL3', 'ELN', 'FBLN1', 'FBN1', 'FBN2', 'FGA', 'FGG', 'FN1', 'FNDC1', 'FRAS1', 'GLDN', 'HMCN1', 'HMCN2', 'IGFBP2', 'IGFBP3', 'IGFBP5', 'IGFBP7', 'ANOS1', 'LAMA2', 'LAMA3', 'LAMB1', 'LAMB3', 'LAMC2', 'LAMC3', 'LTBP1', 'LTBP2', 'MATN3', 'MFAP5', 'MFGE8', 'MGP', 'MMRN1', 'NDNF', 'NELL1', 'NELL2', 'CCN3', '…	['ABI3BP:+', 'BMPER:+', 'CILP:-', 'COMP:-', 'CRIM1:+', 'CRISPLD1:-', 'CRISPLD2:-', 'CCN2:-', 'CCN1:-', 'DMBT1:-', 'EDIL3:+', 'ELN:-', 'FBLN1:-', 'FBN1:-', 'FBN2:-', 'FGA:-', 'FGG:+', 'FN1:-', 'FNDC1:-', 'FRAS1:+', 'GLDN:-', 'HMCN1:-', 'HMCN2:-', 'IGFBP2:-', 'IGFBP3:-', 'IGFBP5:-', 'IGFBP7:-', 'ANOS1:+', 'LAMA2:-', 'LAMA3:+', 'LAMB1:-', 'LAMB3:-', 'LAMC2:-', 'LAMC3:+', 'LTBP1:-', 'LTBP2:-', 'MATN3…
167	WP_ENDODERM_DIFFERENTIATION	0.369905	0.00260008	['WWC1', 'DDAH1', 'TRIM5', 'TOX', 'HNF1B', 'ACACA', 'SMAD3', 'SFRP1', 'GLI2', 'TOX3', 'PLCH1', 'TCF7L1', 'EPB41L5', 'GRHL2', 'LEF1', 'PTHLH', 'EXT1', 'PBX3']	['WWC1:+', 'DDAH1:-', 'TRIM5:-', 'TOX:+', 'HNF1B:-', 'ACACA:+', 'SMAD3:-', 'SFRP1:-', 'GLI2:-', 'TOX3:-', 'PLCH1:+', 'TCF7L1:-', 'EPB41L5:+', 'GRHL2:-', 'LEF1:-', 'PTHLH:-', 'EXT1:+', 'PBX3:-']
168	WP_IL18_SIGNALING_PATHWAY	0.369798	0.00262713	['CCL4', 'BCL2L1', 'SPON1', 'CCL2', 'CCL20', 'CCL19', 'TNFRSF11B', 'CLDN1', 'SDC4', 'FN1', 'CD36', 'IL2RA', 'GRIN2B', 'ACTA2', 'IL6', 'CD83', 'PTGS2', 'GRM7', 'COL3A1', 'CXCL3', 'CXCL2', 'COL1A2', 'CXCL8', 'COL1A1', 'RUNX2', 'MMP1', 'MMP9', 'TNIP3', 'TACR1', 'SNTB1', 'ICAM1', 'BMP2', 'TIMP1', 'TIMP3', 'CCN4', 'EPS8', 'HMOX1', 'PRKCB', 'SEMA6D', 'IL18', 'SPP1', 'BIRC3', 'DES', 'SYT10', 'ADAMTS5', …	['CCL4:-', 'BCL2L1:-', 'SPON1:-', 'CCL2:-', 'CCL20:-', 'CCL19:-', 'TNFRSF11B:-', 'CLDN1:-', 'SDC4:-', 'FN1:-', 'CD36:+', 'IL2RA:-', 'GRIN2B:+', 'ACTA2:-', 'IL6:-', 'CD83:+', 'PTGS2:-', 'GRM7:-', 'COL3A1:-', 'CXCL3:-', 'CXCL2:-', 'COL1A2:-', 'CXCL8:-', 'COL1A1:-', 'RUNX2:-', 'MMP1:-', 'MMP9:-', 'TNIP3:-', 'TACR1:-', 'SNTB1:-', 'ICAM1:-', 'BMP2:-', 'TIMP1:-', 'TIMP3:+', 'CCN4:-', 'EPS8:-', 'HMOX1:+…
169	WP_HAIR_FOLLICLE_DEVELOPMENT_CYTODIFFERENTIATION_PART_3_OF_3	0.369359	0.00270456	['KRT19', 'RBPJ', 'IGF1', 'WIF1', 'LEF1', 'IGFBP5', 'FOSB', 'LRIG1', 'BMP6', 'LGR5', 'TP63', 'SPINK5', 'EGFR', 'PROM1', 'SOX9', 'SFRP1', 'CCN2', 'KRT15', 'GLI2']	['KRT19:-', 'RBPJ:-', 'IGF1:-', 'WIF1:+', 'LEF1:-', 'IGFBP5:-', 'FOSB:-', 'LRIG1:-', 'BMP6:-', 'LGR5:-', 'TP63:-', 'SPINK5:-', 'EGFR:+', 'PROM1:-', 'SOX9:-', 'SFRP1:-', 'CCN2:-', 'KRT15:-', 'GLI2:-']
170	WP_GLUCOCORTICOID_RECEPTOR_PATHWAY	0.368575	0.00283865	['FGFBP1', 'DNAJC15', 'CCL2', 'ANGPTL4', 'CCL20', 'THBD', 'S100P', 'TNS4', 'EDN2', 'PTGS2', 'PPP1R14C', 'BIRC3', 'ANKRD1', 'NAV3', 'ENC1', 'MFGE8', 'ABHD2', 'AKAP13']	['FGFBP1:-', 'DNAJC15:-', 'CCL2:-', 'ANGPTL4:-', 'CCL20:-', 'THBD:+', 'S100P:-', 'TNS4:-', 'EDN2:-', 'PTGS2:-', 'PPP1R14C:-', 'BIRC3:-', 'ANKRD1:+', 'NAV3:+', 'ENC1:-', 'MFGE8:-', 'ABHD2:-', 'AKAP13:+']
171	REACTOME_SLC_MEDIATED_TRANSMEMBRANE_TRANSPORT	0.368341	0.00288873	['SLC7A2', 'CP', 'SLC12A2', 'SLC4A4', 'SLC26A4', 'SLC5A1', 'SLC5A5', 'SLC1A1', 'SLC1A2', 'SLC16A10', 'SLC44A5', 'SLC40A1', 'SLC39A8', 'SLC10A6', 'SLC22A3', 'SLC7A11', 'SLC2A13', 'SLC24A2', 'SLC34A2', 'AHCYL2', 'RUNX1', 'SLC6A20', 'SLC30A8', 'SLCO4C1', 'SLC26A9', 'SLCO2A1', 'SLCO3A1', 'SLC8A1', 'SLC24A3', 'SLC24A5', 'SLC5A8', 'SLC6A14']	['SLC7A2:-', 'CP:-', 'SLC12A2:-', 'SLC4A4:-', 'SLC26A4:-', 'SLC5A1:-', 'SLC5A5:-', 'SLC1A1:-', 'SLC1A2:-', 'SLC16A10:-', 'SLC44A5:-', 'SLC40A1:+', 'SLC39A8:+', 'SLC10A6:-', 'SLC22A3:+', 'SLC7A11:+', 'SLC2A13:+', 'SLC24A2:-', 'SLC34A2:-', 'AHCYL2:+', 'RUNX1:-', 'SLC6A20:+', 'SLC30A8:-', 'SLCO4C1:+', 'SLC26A9:-', 'SLCO2A1:+', 'SLCO3A1:-', 'SLC8A1:+', 'SLC24A3:-', 'SLC24A5:-', 'SLC5A8:-', 'SLC6A14:+…
172	REACTOME_INTERLEUKIN_4_AND_INTERLEUKIN_13_SIGNALING	0.367989	0.00295912	['PTGS2', 'ICAM1', 'HMOX1', 'MMP9', 'TIMP1', 'CCL22', 'CCL2', 'FN1', 'IL13RA2', 'LIF', 'ANXA1', 'CD36', 'IL6', 'IRF4', 'FGF2', 'LCN2', 'IL18', 'ALOX15', 'VCAM1', 'COL1A2', 'CXCL8', 'BCL2L1', 'SAA1', 'MAOA', 'MMP1']	['PTGS2:-', 'ICAM1:-', 'HMOX1:+', 'MMP9:-', 'TIMP1:-', 'CCL22:-', 'CCL2:-', 'FN1:-', 'IL13RA2:-', 'LIF:-', 'ANXA1:-', 'CD36:+', 'IL6:-', 'IRF4:-', 'FGF2:-', 'LCN2:-', 'IL18:-', 'ALOX15:-', 'VCAM1:-', 'COL1A2:-', 'CXCL8:-', 'BCL2L1:-', 'SAA1:-', 'MAOA:+', 'MMP1:-']
173	REACTOME_ION_TRANSPORT_BY_P_TYPE_ATPASES	0.367946	0.00297917	['CAMK2B', 'ATP2B4', 'ATP2C2', 'ATP11A', 'ATP12A', 'ATP10B', 'ATP8A1', 'ATP13A4', 'ATP8A2', 'ATP1B1', 'ATP10A']	['CAMK2B:-', 'ATP2B4:-', 'ATP2C2:+', 'ATP11A:+', 'ATP12A:-', 'ATP10B:-', 'ATP8A1:+', 'ATP13A4:+', 'ATP8A2:-', 'ATP1B1:-', 'ATP10A:-']
174	REACTOME_SEMA4D_IN_SEMAPHORIN_SIGNALING	0.367777	0.00302084	['MYH14', 'MET', 'MYH10', 'MYH11', 'RND1']	['MYH14:-', 'MET:-', 'MYH10:+', 'MYH11:-', 'RND1:+']
175	PID_ERBB1_DOWNSTREAM_PATHWAY	0.367629	0.00305928	['EPS8', 'DUSP6', 'DIAPH3', 'EGFR', 'SFN', 'KSR1', 'BCL2L1', 'EGF', 'PRKCZ']	['EPS8:-', 'DUSP6:+', 'DIAPH3:+', 'EGFR:+', 'SFN:-', 'KSR1:-', 'BCL2L1:-', 'EGF:-', 'PRKCZ:+']
176	REACTOME_RNA_POLYMERASE_II_TRANSCRIPTION	0.367398	0.0031128	['MAMLD1', 'HDAC9', 'NEDD4L', 'CAMK2B', 'PRKCQ', 'TP63', 'GLI2', 'NUAK1', 'RBFOX1', 'TBX5', 'HNF4A', 'NFATC2', 'RBBP8', 'NDRG1', 'CAV1', 'MET', 'SERPINE1', 'COL1A1', 'PPARGC1A', 'SOD2', 'LIFR', 'GLS', 'NR5A2', 'CCN2', 'SPP1', 'NR4A3', 'CAT', 'RUNX2', 'SOX9', 'BMP2', 'APOE', 'PPARG', 'CCNA1', 'RFC3', 'IL2RA', 'MDM2', 'IL6', 'BRIP1', 'BLK', 'CTSV', 'YAP1', 'THBS1', 'SMAD6', 'INTS12', 'LEF1', 'ESR2'…	['MAMLD1:-', 'HDAC9:+', 'NEDD4L:+', 'CAMK2B:-', 'PRKCQ:-', 'TP63:-', 'GLI2:-', 'NUAK1:-', 'RBFOX1:-', 'TBX5:+', 'HNF4A:-', 'NFATC2:-', 'RBBP8:-', 'NDRG1:-', 'CAV1:-', 'MET:-', 'SERPINE1:-', 'COL1A1:-', 'PPARGC1A:+', 'SOD2:+', 'LIFR:+', 'GLS:+', 'NR5A2:-', 'CCN2:-', 'SPP1:-', 'NR4A3:-', 'CAT:+', 'RUNX2:-', 'SOX9:-', 'BMP2:-', 'APOE:-', 'PPARG:+', 'CCNA1:-', 'RFC3:+', 'IL2RA:-', 'MDM2:-', 'IL6:-', …
177	REACTOME_RHO_GTPASES_ACTIVATE_PAKS	0.365605	0.00345411	['MYLK', 'PAK3', 'MYH14', 'MYH10', 'MYH11']	['MYLK:+', 'PAK3:-', 'MYH14:-', 'MYH10:+', 'MYH11:-']
178	REACTOME_GLYCOSAMINOGLYCAN_METABOLISM	0.365575	0.00347539	['HS3ST1', 'VCAN', 'ST3GAL6', 'GPC4', 'XYLT1', 'CEMIP', 'UST', 'HS3ST2', 'SDC4', 'STAB2', 'LUM', 'GPC3', 'HS3ST3A1', 'CHST9', 'ACAN', 'HAS2', 'HS6ST2', 'HPSE2', 'GPC5', 'EXT1', 'BGN', 'HS3ST4', 'GPC6', 'HS6ST3', 'PRELP', 'CHSY3', 'PAPSS2', 'HS3ST5']	['HS3ST1:-', 'VCAN:-', 'ST3GAL6:+', 'GPC4:-', 'XYLT1:-', 'CEMIP:-', 'UST:-', 'HS3ST2:-', 'SDC4:-', 'STAB2:-', 'LUM:-', 'GPC3:+', 'HS3ST3A1:-', 'CHST9:-', 'ACAN:+', 'HAS2:-', 'HS6ST2:-', 'HPSE2:-', 'GPC5:-', 'EXT1:+', 'BGN:-', 'HS3ST4:-', 'GPC6:-', 'HS6ST3:-', 'PRELP:+', 'CHSY3:-', 'PAPSS2:+', 'HS3ST5:+']
179	WP_AMPLIFICATION_AND_EXPANSION_OF_ONCOGENIC_PATHWAYS_AS_METASTATIC_TRAITS	0.365424	0.00352029	['VCAM1', 'EPAS1', 'TNC', 'TCF7L1', 'LEF1', 'POSTN']	['VCAM1:-', 'EPAS1:+', 'TNC:-', 'TCF7L1:-', 'LEF1:-', 'POSTN:-']
180	REACTOME_COMPLEMENT_CASCADE	0.365187	0.00358276	['C6', 'CPB2', 'C5', 'C7', 'C9', 'CR2', 'CLU', 'C4BPA', 'C4BPB', 'C3', 'FCN3', 'CD55', 'IGHV3-23']	['C6:-', 'CPB2:+', 'C5:+', 'C7:+', 'C9:+', 'CR2:-', 'CLU:-', 'C4BPA:+', 'C4BPB:-', 'C3:-', 'FCN3:+', 'CD55:+', 'IGHV3-23:-']
181	WP_METAPATHWAY_BIOTRANSFORMATION_PHASE_I_AND_II	0.364061	0.00382896	['INMT', 'HS6ST2', 'HS3ST5', 'CYP3A5', 'CYP24A1', 'FMO5', 'FMO1', 'HS6ST3', 'SULT1E1', 'AKR1C1', 'SULT1C2', 'CYP26B1', 'UGT2B7', 'CYP7B1', 'HS3ST4', 'CHST9', 'CYP1B1', 'MGST1', 'BAAT', 'HS3ST1', 'HS3ST3A1', 'HS3ST2', 'CYP2F1']	['INMT:+', 'HS6ST2:-', 'HS3ST5:+', 'CYP3A5:+', 'CYP24A1:-', 'FMO5:+', 'FMO1:-', 'HS6ST3:-', 'SULT1E1:-', 'AKR1C1:-', 'SULT1C2:-', 'CYP26B1:-', 'UGT2B7:-', 'CYP7B1:-', 'HS3ST4:-', 'CHST9:-', 'CYP1B1:-', 'MGST1:-', 'BAAT:-', 'HS3ST1:-', 'HS3ST3A1:-', 'HS3ST2:-', 'CYP2F1:-']
182	REACTOME_LONG_TERM_POTENTIATION	0.36379	0.00390405	['CAMK2B', 'DLG2', 'GRIA1', 'NRG1', 'ERBB4', 'GRIN2A', 'GRIN2B']	['CAMK2B:-', 'DLG2:-', 'GRIA1:+', 'NRG1:-', 'ERBB4:+', 'GRIN2A:-', 'GRIN2B:+']
183	WP_RELATIONSHIP_BETWEEN_INFLAMMATION_COX2_AND_EGFR	0.362887	0.00412038	['PLA1A', 'PTGER3', 'EGFR', 'MMP1', 'PTGS2']	['PLA1A:+', 'PTGER3:-', 'EGFR:+', 'MMP1:-', 'PTGS2:-']
184	WP_COMPLEMENT_AND_COAGULATION_CASCADES	0.362181	0.00430169	['SERPINA1', 'F3', 'CR2', 'C3', 'VWF', 'THBD', 'CLU', 'C6', 'CPB2', 'C7', 'C9', 'SERPINE1', 'PLAT', 'PLAU', 'PLAUR', 'CD55']	['SERPINA1:-', 'F3:-', 'CR2:-', 'C3:-', 'VWF:+', 'THBD:+', 'CLU:-', 'C6:-', 'CPB2:+', 'C7:+', 'C9:+', 'SERPINE1:-', 'PLAT:+', 'PLAU:-', 'PLAUR:-', 'CD55:+']
185	REACTOME_METABOLISM_OF_AMINO_ACIDS_AND_DERIVATIVES	0.362109	0.00433853	['AASS', 'BCAT1', 'ARG2', 'PRODH', 'SLC5A5', 'GLS', 'KYNU', 'BBOX1', 'TPH1', 'SAT1', 'IDO1', 'DMGDH', 'SDS', 'DUOX1', 'ACMSD', 'RIMKLB', 'RIMKLA', 'SLC25A21', 'PAPSS2', 'DIO2', 'INMT']	['AASS:+', 'BCAT1:-', 'ARG2:+', 'PRODH:+', 'SLC5A5:-', 'GLS:+', 'KYNU:-', 'BBOX1:-', 'TPH1:-', 'SAT1:-', 'IDO1:-', 'DMGDH:-', 'SDS:-', 'DUOX1:+', 'ACMSD:-', 'RIMKLB:+', 'RIMKLA:+', 'SLC25A21:-', 'PAPSS2:+', 'DIO2:-', 'INMT:+']
186	REACTOME_RHOG_GTPASE_CYCLE	0.361581	0.00448533	['DOCK3', 'CAV1', 'ARHGEF26', 'DIAPH3', 'DOCK5', 'MPP7', 'KALRN']	['DOCK3:-', 'CAV1:-', 'ARHGEF26:+', 'DIAPH3:+', 'DOCK5:-', 'MPP7:-', 'KALRN:+']
187	WP_SEROTONIN_TRANSPORTER_ACTIVITY	0.361498	0.00452656	['IL1R1', 'SLC6A4', 'NOS1', 'MAOA']	['IL1R1:-', 'SLC6A4:+', 'NOS1:+', 'MAOA:+']
188	REACTOME_NEUROTRANSMITTER_RECEPTORS_AND_POSTSYNAPTIC_SIGNAL_TRANSMISSION	0.361001	0.00467168	['RASGRF1', 'CAMK2B', 'CACNG4', 'ADCY2', 'EPB41L1', 'NCALD', 'APBA1', 'LIN7A', 'RASGRF2', 'GNGT1', 'MDM2', 'GABBR2', 'GABRB2', 'GRIK4', 'DLG2', 'KCNJ16', 'GRIA1', 'ADCY8', 'GRIP1', 'NRG1', 'KCNJ6', 'KCNJ15', 'GRIK2', 'PRKCB', 'NBEA', 'ADCY5', 'PPM1E', 'ERBB4', 'GABRG3', 'PLCB1', 'GRIN2A', 'TUBB4B', 'MYO6', 'GRIN2B']	['RASGRF1:+', 'CAMK2B:-', 'CACNG4:-', 'ADCY2:-', 'EPB41L1:-', 'NCALD:+', 'APBA1:-', 'LIN7A:+', 'RASGRF2:-', 'GNGT1:-', 'MDM2:-', 'GABBR2:-', 'GABRB2:-', 'GRIK4:+', 'DLG2:-', 'KCNJ16:-', 'GRIA1:+', 'ADCY8:+', 'GRIP1:-', 'NRG1:-', 'KCNJ6:-', 'KCNJ15:+', 'GRIK2:-', 'PRKCB:-', 'NBEA:-', 'ADCY5:-', 'PPM1E:-', 'ERBB4:+', 'GABRG3:-', 'PLCB1:-', 'GRIN2A:-', 'TUBB4B:-', 'MYO6:+', 'GRIN2B:+']
189	WP_FRAGILE_X_SYNDROME	0.360512	0.00481899	['DEPTOR', 'KCND2', 'GABRB2', 'EPHA4', 'GRIP1', 'CAMK2B', 'NTRK2', 'MAP1B', 'GRIN2B', 'GRIN2A', 'GRM5', 'GRIA1', 'HOMER1', 'PLCB1', 'SH3GL3', 'BDNF', 'MMP9']	['DEPTOR:-', 'KCND2:-', 'GABRB2:-', 'EPHA4:-', 'GRIP1:-', 'CAMK2B:-', 'NTRK2:+', 'MAP1B:-', 'GRIN2B:+', 'GRIN2A:-', 'GRM5:-', 'GRIA1:+', 'HOMER1:-', 'PLCB1:-', 'SH3GL3:+', 'BDNF:+', 'MMP9:-']
190	WP_MONOAMINE_TRANSPORT	0.360412	0.00486802	['FBXO32', 'SLC6A4', 'AMPH', 'IL1R1', 'NOS1', 'UNC13B', 'TNFRSF11B', 'ACHE']	['FBXO32:-', 'SLC6A4:+', 'AMPH:-', 'IL1R1:-', 'NOS1:+', 'UNC13B:+', 'TNFRSF11B:-', 'ACHE:-']
191	REACTOME_HS_GAG_DEGRADATION	0.360149	0.00496097	['GPC4', 'SDC4', 'GPC3', 'HPSE2', 'GPC5', 'GPC6']	['GPC4:-', 'SDC4:-', 'GPC3:+', 'HPSE2:-', 'GPC5:-', 'GPC6:-']
192	WP_SYNAPTIC_SIGNALING_PATHWAYS_ASSOCIATED_WITH_AUTISM_SPECTRUM_DISORDER	0.360091	0.00500025	['GRIN2B', 'GRIN2A', 'CACNA1C', 'CAMK2B', 'HOMER1', 'NTRK2', 'BDNF']	['GRIN2B:+', 'GRIN2A:-', 'CACNA1C:-', 'CAMK2B:-', 'HOMER1:-', 'NTRK2:+', 'BDNF:+']
193	WP_EGFEGFR_SIGNALING_PATHWAY	0.359896	0.00507715	['REPS2', 'EPS8', 'PRKCB', 'MAPK4', 'PRKCZ', 'FOSB', 'ERRFI1', 'SH3GL2', 'EGF', 'CAV1', 'EGFR', 'SH3GL3']	['REPS2:-', 'EPS8:-', 'PRKCB:-', 'MAPK4:+', 'PRKCZ:+', 'FOSB:-', 'ERRFI1:-', 'SH3GL2:+', 'EGF:-', 'CAV1:-', 'EGFR:+', 'SH3GL3:+']
194	REACTOME_FREE_FATTY_ACIDS_REGULATE_INSULIN_SECRETION	0.358554	0.00548168	['ACSL4', 'CD36', 'GNA14', 'PLCB1']	['ACSL4:-', 'CD36:+', 'GNA14:+', 'PLCB1:-']
195	KEGG_SYSTEMIC_LUPUS_ERYTHEMATOSUS	0.358057	0.00565606	['C9', 'C7', 'C6', 'C5', 'C3', 'GRIN2A', 'GRIN2B']	['C9:+', 'C7:+', 'C6:-', 'C5:+', 'C3:-', 'GRIN2A:-', 'GRIN2B:+']
196	WP_HEMATOPOIETIC_STEM_CELL_DIFFERENTIATION	0.355608	0.00646886	['NFATC2', 'RHOH', 'IL6', 'LEF1', 'FOSB', 'CSF3', 'CSF2', 'HES6', 'RUNX1']	['NFATC2:-', 'RHOH:-', 'IL6:-', 'LEF1:-', 'FOSB:-', 'CSF3:+', 'CSF2:+', 'HES6:-', 'RUNX1:-']
197	REACTOME_EPH_EPHRIN_SIGNALING	0.354965	0.00672325	['EPHA3', 'PAK3', 'EPHA6', 'MMP9', 'MYH14', 'EPHA4', 'EFNB2', 'MYH10', 'EPHB2', 'MYH11', 'EPHA7', 'KALRN', 'EFNA5', 'LYN', 'GRIN2B']	['EPHA3:-', 'PAK3:-', 'EPHA6:+', 'MMP9:-', 'MYH14:-', 'EPHA4:-', 'EFNB2:+', 'MYH10:+', 'EPHB2:-', 'MYH11:-', 'EPHA7:+', 'KALRN:+', 'EFNA5:-', 'LYN:-', 'GRIN2B:+']
198	REACTOME_CIRCADIAN_CLOCK	0.354887	0.00678396	['ARNTL2', 'SERPINE1', 'PPARGC1A', 'NPAS2']	['ARNTL2:-', 'SERPINE1:-', 'PPARGC1A:+', 'NPAS2:-']
199	WP_NEURAL_CREST_DIFFERENTIATION	0.352374	0.00776827	['RBPJ', 'CDH1', 'CDH2', 'SOX5', 'SOX9', 'CDH6', 'TCF7L1', 'FGF2', 'HDAC9', 'FGFR2', 'PRTG']	['RBPJ:-', 'CDH1:-', 'CDH2:-', 'SOX5:+', 'SOX9:-', 'CDH6:-', 'TCF7L1:-', 'FGF2:-', 'HDAC9:+', 'FGFR2:-', 'PRTG:+']
200	KEGG_REGULATION_OF_ACTIN_CYTOSKELETON	0.352112	0.00791339	['FN1', 'RRAS2', 'ITGA11', 'MYLK', 'MYH10', 'FGF7', 'PDGFD', 'FGF1', 'FGF2', 'FGFR2', 'FGF14', 'FGF10', 'FGF12', 'FGF13', 'ITGA8', 'ITGA9', 'MYH14', 'DIAPH3', 'ITGB6', 'PIP5K1B', 'CHRM2', 'CHRM3', 'ITGB8', 'PAK5', 'EZR', 'PAK3', 'EGFR', 'EGF', 'ITGA6', 'ITGA2', 'ITGA1']	['FN1:-', 'RRAS2:+', 'ITGA11:-', 'MYLK:+', 'MYH10:+', 'FGF7:-', 'PDGFD:-', 'FGF1:-', 'FGF2:-', 'FGFR2:-', 'FGF14:-', 'FGF10:+', 'FGF12:+', 'FGF13:-', 'ITGA8:+', 'ITGA9:-', 'MYH14:-', 'DIAPH3:+', 'ITGB6:-', 'PIP5K1B:+', 'CHRM2:+', 'CHRM3:+', 'ITGB8:-', 'PAK5:+', 'EZR:-', 'PAK3:-', 'EGFR:+', 'EGF:-', 'ITGA6:-', 'ITGA2:-', 'ITGA1:+']
201	REACTOME_DOWNREGULATION_OF_TGF_BETA_RECEPTOR_SIGNALING,REACTOME_TGF_BETA_RECEPTOR_SIGNALING_ACTIVATES_SMADS	0.351516	0.00820023	['NEDD4L', 'PMEPA1', 'SMAD3', 'SMURF1']	['NEDD4L:+', 'PMEPA1:-', 'SMAD3:-', 'SMURF1:-']
202	REACTOME_ASSEMBLY_OF_COLLAGEN_FIBRILS_AND_OTHER_MULTIMERIC_STRUCTURES	0.351497	0.00824945	['TLL1', 'LAMA3', 'LAMC2', 'COL11A1', 'COL17A1', 'COL5A3', 'COL4A4', 'ITGA6', 'MMP9', 'COL1A1', 'COL12A1', 'COL7A1', 'COL10A1', 'COL5A1', 'COL4A2', 'CTSV', 'MMP7', 'LOXL4', 'COL8A1', 'COL6A3', 'COL1A2', 'BMP1', 'COL3A1', 'COL4A3', 'COL24A1', 'COL4A1', 'COL14A1', 'COL27A1', 'LAMB3', 'COL4A6', 'COL5A2', 'COL15A1', 'COL6A6']	['TLL1:+', 'LAMA3:+', 'LAMC2:-', 'COL11A1:-', 'COL17A1:-', 'COL5A3:-', 'COL4A4:+', 'ITGA6:-', 'MMP9:-', 'COL1A1:-', 'COL12A1:-', 'COL7A1:-', 'COL10A1:-', 'COL5A1:-', 'COL4A2:-', 'CTSV:-', 'MMP7:-', 'LOXL4:-', 'COL8A1:-', 'COL6A3:-', 'COL1A2:-', 'BMP1:-', 'COL3A1:-', 'COL4A3:+', 'COL24A1:-', 'COL4A1:-', 'COL14A1:-', 'COL27A1:-', 'LAMB3:-', 'COL4A6:-', 'COL5A2:-', 'COL15A1:-', 'COL6A6:+']
203	KEGG_ADHERENS_JUNCTION	0.350647	0.00866056	['SORBS1', 'LEF1', 'PTPRJ', 'SMAD3', 'INSR', 'PTPRB', 'EGFR', 'MET', 'TCF7L1', 'CTNNA3', 'LMO7', 'PTPN1', 'CDH1']	['SORBS1:+', 'LEF1:-', 'PTPRJ:+', 'SMAD3:-', 'INSR:-', 'PTPRB:+', 'EGFR:+', 'MET:-', 'TCF7L1:-', 'CTNNA3:-', 'LMO7:+', 'PTPN1:-', 'CDH1:-']
204	REACTOME_TRANSCRIPTIONAL_REGULATION_BY_RUNX3	0.350412	0.00880965	['MAMLD1', 'CCN2', 'SPP1', 'MDM2', 'YAP1', 'LEF1', 'TCF7L1', 'RUNX1', 'SMAD3', 'RBPJ', 'SMURF1']	['MAMLD1:-', 'CCN2:-', 'SPP1:-', 'MDM2:-', 'YAP1:+', 'LEF1:-', 'TCF7L1:-', 'RUNX1:-', 'SMAD3:-', 'RBPJ:-', 'SMURF1:-']
205	REACTOME_RHO_GTPASES_ACTIVATE_ROCKS	0.349529	0.00926196	['MYH14', 'MYH10', 'MYH11']	['MYH14:-', 'MYH10:+', 'MYH11:-']
206	REACTOME_BMAL1_CLOCK_NPAS2_ACTIVATES_CIRCADIAN_GENE_EXPRESSION	0.348742	0.00968825	['ARNTL2', 'SERPINE1', 'NPAS2']	['ARNTL2:-', 'SERPINE1:-', 'NPAS2:-']
207	REACTOME_SEMA4D_INDUCED_CELL_MIGRATION_AND_GROWTH_CONE_COLLAPSE	0.348387	0.00991436	['MYH14', 'MYH10', 'MYH11', 'RND1']	['MYH14:-', 'MYH10:+', 'MYH11:-', 'RND1:+']
208	REACTOME_MOLECULES_ASSOCIATED_WITH_ELASTIC_FIBRES	0.347608	0.0103651	['LTBP1', 'ELN', 'FBLN1', 'ITGA8', 'TGFB2', 'ITGB8', 'ITGB6', 'FN1', 'LTBP2', 'BMP2', 'FBN2', 'FBN1', 'MFAP5']	['LTBP1:-', 'ELN:-', 'FBLN1:-', 'ITGA8:+', 'TGFB2:+', 'ITGB8:-', 'ITGB6:-', 'FN1:-', 'LTBP2:-', 'BMP2:-', 'FBN2:-', 'FBN1:-', 'MFAP5:-']
209	PID_P53_DOWNSTREAM_PATHWAY	0.347513	0.0104686	['IGFBP3', 'TP63', 'VCAN', 'MDM2', 'MET', 'CAV1', 'CX3CL1', 'SERPINE1', 'NDRG1', 'GDF15', 'SPP1', 'LIF', 'EGFR', 'SFN', 'S100A2', 'BCL2L1', 'EDN2']	['IGFBP3:-', 'TP63:-', 'VCAN:-', 'MDM2:-', 'MET:-', 'CAV1:-', 'CX3CL1:-', 'SERPINE1:-', 'NDRG1:-', 'GDF15:-', 'SPP1:-', 'LIF:-', 'EGFR:+', 'SFN:-', 'S100A2:-', 'BCL2L1:-', 'EDN2:-']
210	WP_VITAMIN_D_RECEPTOR_PATHWAY	0.34737	0.0105995	['TPM1', 'IGFBP3', 'TGFB2', 'CYP3A5', 'DUSP10', 'MX2', 'THBD', 'TNFRSF11B', 'CYP24A1', 'IGFBP5', 'CD9', 'IRF4', 'STS', 'BMP6', 'ATP2C2', 'TIMP3', 'SFRP1', 'SULT1C2', 'RASGRP1', 'S100A2', 'NFATC2', 'GXYLT2', 'SLC8A1', 'HSD17B2', 'STEAP4', 'PRKCQ', 'PTHLH', 'EFNA5', 'SPP1', 'ABCB1', 'KRT13', 'ADAMTS5', 'SLC34A2', 'MEG8']	['TPM1:-', 'IGFBP3:-', 'TGFB2:+', 'CYP3A5:+', 'DUSP10:-', 'MX2:-', 'THBD:+', 'TNFRSF11B:-', 'CYP24A1:-', 'IGFBP5:-', 'CD9:-', 'IRF4:-', 'STS:-', 'BMP6:-', 'ATP2C2:+', 'TIMP3:+', 'SFRP1:-', 'SULT1C2:-', 'RASGRP1:-', 'S100A2:-', 'NFATC2:-', 'GXYLT2:-', 'SLC8A1:+', 'HSD17B2:+', 'STEAP4:-', 'PRKCQ:-', 'PTHLH:-', 'EFNA5:-', 'SPP1:-', 'ABCB1:-', 'KRT13:-', 'ADAMTS5:-', 'SLC34A2:-', 'MEG8:-']
211	KEGG_PPAR_SIGNALING_PATHWAY	0.347078	0.0108128	['SORBS1', 'ACADL', 'CD36', 'SCD', 'ME1', 'MMP1', 'GK', 'ANGPTL4', 'SLC27A2', 'FABP4', 'FABP6', 'PPARG', 'SCD5', 'ACSL4']	['SORBS1:+', 'ACADL:+', 'CD36:+', 'SCD:+', 'ME1:-', 'MMP1:-', 'GK:-', 'ANGPTL4:-', 'SLC27A2:-', 'FABP4:-', 'FABP6:-', 'PPARG:+', 'SCD5:-', 'ACSL4:-']
212	KEGG_HYPERTROPHIC_CARDIOMYOPATHY_HCM	0.347074	0.0108721	['CACNB2', 'CACNB4', 'ITGA9', 'IGF1', 'RYR2', 'CACNG6', 'TPM1', 'ITGA11', 'DMD', 'CACNA2D3', 'CACNA1D', 'SLC8A1', 'CACNA1C', 'CACNA2D2', 'ITGB6', 'SGCD', 'ITGA8', 'LAMA2', 'TGFB2', 'ITGB8', 'TTN', 'ITGA6', 'ITGA2', 'ITGA1', 'CACNG4', 'DES', 'IL6']	['CACNB2:+', 'CACNB4:+', 'ITGA9:-', 'IGF1:-', 'RYR2:-', 'CACNG6:-', 'TPM1:-', 'ITGA11:-', 'DMD:-', 'CACNA2D3:+', 'CACNA1D:+', 'SLC8A1:+', 'CACNA1C:-', 'CACNA2D2:+', 'ITGB6:-', 'SGCD:-', 'ITGA8:+', 'LAMA2:-', 'TGFB2:+', 'ITGB8:-', 'TTN:+', 'ITGA6:-', 'ITGA2:-', 'ITGA1:+', 'CACNG4:-', 'DES:-', 'IL6:-']
213	WP_ALLOGRAFT_REJECTION	0.346676	0.0111498	['IL2RA', 'GNLY', 'C3', 'CCL19', 'CCL21', 'PRKCZ', 'LRRK2', 'C5', 'C6', 'CXCL11', 'ABCB1', 'C7', 'CXCL8', 'C9', 'CXCL9', 'CXCL12', 'COL5A1', 'CD55']	['IL2RA:-', 'GNLY:+', 'C3:-', 'CCL19:-', 'CCL21:-', 'PRKCZ:+', 'LRRK2:-', 'C5:+', 'C6:-', 'CXCL11:-', 'ABCB1:-', 'C7:+', 'CXCL8:-', 'C9:+', 'CXCL9:+', 'CXCL12:-', 'COL5A1:-', 'CD55:+']
214	WP_BURN_WOUND_HEALING	0.34662	0.0112408	['TGFB2', 'CCL2', 'TNC', 'TAGLN', 'SCEL', 'ADAM12', 'ICAM1', 'FBN1', 'TIMP1', 'SMAD3', 'KDR', 'CXCL12', 'SFRP2', 'MMP28', 'FN1', 'ACHE', 'NOX4', 'CXCL14', 'IL6', 'CXCL1', 'SPARC', 'ELN', 'EGF', 'COL1A2', 'CXCL8', 'COL1A1', 'KRT6A', 'FGFR2', 'INHBA', 'MMP1', 'MMP9']	['TGFB2:+', 'CCL2:-', 'TNC:-', 'TAGLN:-', 'SCEL:+', 'ADAM12:-', 'ICAM1:-', 'FBN1:-', 'TIMP1:-', 'SMAD3:-', 'KDR:+', 'CXCL12:-', 'SFRP2:-', 'MMP28:-', 'FN1:-', 'ACHE:-', 'NOX4:-', 'CXCL14:-', 'IL6:-', 'CXCL1:-', 'SPARC:-', 'ELN:-', 'EGF:-', 'COL1A2:-', 'CXCL8:-', 'COL1A1:-', 'KRT6A:-', 'FGFR2:-', 'INHBA:-', 'MMP1:-', 'MMP9:-']
215	WP_ALZHEIMERS_DISEASE_AND_MIRNA_EFFECTS,WP_ALZHEIMERS_DISEASE	0.346511	0.0113632	['NOS1', 'MCU', 'INSR', 'RYR3', 'MAPK10', 'GRIN2B', 'GRIN2A', 'XBP1', 'IL6', 'PTGS2', 'AGER', 'PLCB1', 'DKK2', 'SNCA', 'TUBB4B', 'CACNA1C', 'CACNA1D', 'NOX4', 'ITPR3', 'ERN1', 'APOE']	['NOS1:+', 'MCU:-', 'INSR:-', 'RYR3:-', 'MAPK10:-', 'GRIN2B:+', 'GRIN2A:-', 'XBP1:-', 'IL6:-', 'PTGS2:-', 'AGER:+', 'PLCB1:-', 'DKK2:-', 'SNCA:+', 'TUBB4B:-', 'CACNA1C:-', 'CACNA1D:+', 'NOX4:-', 'ITPR3:+', 'ERN1:-', 'APOE:-']
216	REACTOME_RHO_GTPASES_ACTIVATE_CIT	0.34644	0.0114654	['MYH14', 'CIT', 'MYH10', 'MYH11']	['MYH14:-', 'CIT:-', 'MYH10:+', 'MYH11:-']
217	REACTOME_ACYL_CHAIN_REMODELLING_OF_PS	0.345806	0.0118976	['PLA2G5', 'OSBPL10', 'PLA1A', 'PLA2G4F', 'PLA2G2A']	['PLA2G5:-', 'OSBPL10:-', 'PLA1A:+', 'PLA2G4F:+', 'PLA2G2A:-']
218	REACTOME_RHO_GTPASE_EFFECTORS	0.345359	0.0122317	['CFTR', 'CDH1', 'MYLK', 'PRKCZ', 'PAK3', 'MYH14', 'CENPF', 'WIPF3', 'CIT', 'MYH10', 'MYH11', 'DIAPH3', 'PRKCB', 'SCAI', 'SFN', 'TUBB4B', 'CENPP']	['CFTR:+', 'CDH1:-', 'MYLK:+', 'PRKCZ:+', 'PAK3:-', 'MYH14:-', 'CENPF:-', 'WIPF3:-', 'CIT:-', 'MYH10:+', 'MYH11:-', 'DIAPH3:+', 'PRKCB:-', 'SCAI:+', 'SFN:-', 'TUBB4B:-', 'CENPP:-']
219	BIOCARTA_TSP1_PATHWAY	0.344644	0.0127423	['CD36', 'THBS1']	['CD36:+', 'THBS1:-']
220	REACTOME_SARS_COV_1_INFECTION	0.343987	0.0132357	['ST6GAL1', 'ACE2', 'ST6GALNAC3', 'TMPRSS2']	['ST6GAL1:-', 'ACE2:-', 'ST6GALNAC3:-', 'TMPRSS2:-']
221	PID_HIF2PATHWAY	0.343729	0.0134794	['SERPINE1', 'KDR', 'EPAS1', 'EGLN3', 'FLT1']	['SERPINE1:-', 'KDR:+', 'EPAS1:+', 'EGLN3:-', 'FLT1:+']
222	REACTOME_ELASTIC_FIBRE_FORMATION	0.342445	0.0144355	['LTBP1', 'ELN', 'FBLN1', 'ITGA8', 'TGFB2', 'ITGB8', 'ITGB6', 'FN1', 'LTBP2', 'BMP2', 'LOXL4', 'FBN2', 'FBN1', 'MFAP5']	['LTBP1:-', 'ELN:-', 'FBLN1:-', 'ITGA8:+', 'TGFB2:+', 'ITGB8:-', 'ITGB6:-', 'FN1:-', 'LTBP2:-', 'BMP2:-', 'LOXL4:-', 'FBN2:-', 'FBN1:-', 'MFAP5:-']
223	KEGG_CYTOKINE_CYTOKINE_RECEPTOR_INTERACTION	0.34227	0.0146408	['CCL2', 'TNFSF14', 'CCL4', 'FLT1', 'CCL20', 'CCL19', 'CCL21', 'CCL23', 'CCL22', 'CSF2', 'PRLR', 'TGFB2', 'CX3CL1', 'CXCL11', 'CSF3', 'MET', 'CSF3R', 'CXCL12', 'CXCL10', 'IFNLR1', 'INHBA', 'TNFRSF19', 'IL1R2', 'KIT', 'TNFRSF11B', 'IL18', 'CXCL9', 'LIF', 'LIFR', 'EDA', 'CXCL14', 'VEGFC', 'TNFSF15', 'CXCL1', 'CXCL8', 'KDR', 'EGFR', 'EGF', 'IL1R1', 'IL2RA', 'IL20RA', 'BMPR1B', 'CXCL2', 'CXCL3', 'BMP…	['CCL2:-', 'TNFSF14:-', 'CCL4:-', 'FLT1:+', 'CCL20:-', 'CCL19:-', 'CCL21:-', 'CCL23:+', 'CCL22:-', 'CSF2:+', 'PRLR:+', 'TGFB2:+', 'CX3CL1:-', 'CXCL11:-', 'CSF3:+', 'MET:-', 'CSF3R:+', 'CXCL12:-', 'CXCL10:-', 'IFNLR1:-', 'INHBA:-', 'TNFRSF19:-', 'IL1R2:+', 'KIT:-', 'TNFRSF11B:-', 'IL18:-', 'CXCL9:+', 'LIF:-', 'LIFR:+', 'EDA:+', 'CXCL14:-', 'VEGFC:+', 'TNFSF15:-', 'CXCL1:-', 'CXCL8:-', 'KDR:+', 'EG…
224	REACTOME_COLLAGEN_FORMATION	0.341288	0.0154449	['TLL1', 'COL23A1', 'LAMA3', 'LAMC2', 'COL11A1', 'COL17A1', 'COL5A3', 'COL4A4', 'P3H2', 'ITGA6', 'MMP9', 'COL1A1', 'COL12A1', 'COL7A1', 'COL10A1', 'COL21A1', 'COL5A1', 'COL4A2', 'CTSV', 'MMP7', 'LOXL4', 'ADAMTS14', 'COL8A1', 'PLOD2', 'ADAMTS3', 'COL6A3', 'COL1A2', 'BMP1', 'COL3A1', 'COL4A3', 'COL22A1', 'COL24A1', 'COL4A1', 'COL14A1', 'COL25A1', 'COL27A1', 'LAMB3', 'COL4A6', 'COL5A2', 'COL15A1', '…	['TLL1:+', 'COL23A1:-', 'LAMA3:+', 'LAMC2:-', 'COL11A1:-', 'COL17A1:-', 'COL5A3:-', 'COL4A4:+', 'P3H2:+', 'ITGA6:-', 'MMP9:-', 'COL1A1:-', 'COL12A1:-', 'COL7A1:-', 'COL10A1:-', 'COL21A1:-', 'COL5A1:-', 'COL4A2:-', 'CTSV:-', 'MMP7:-', 'LOXL4:-', 'ADAMTS14:-', 'COL8A1:-', 'PLOD2:-', 'ADAMTS3:-', 'COL6A3:-', 'COL1A2:-', 'BMP1:-', 'COL3A1:-', 'COL4A3:+', 'COL22A1:-', 'COL24A1:-', 'COL4A1:-', 'COL14A1…
225	REACTOME_PLATELET_HOMEOSTASIS	0.341269	0.0155466	['ATP2B4', 'IRAG1', 'NOS1', 'ITPR3', 'PDE10A', 'PDE1A', 'GNGT1', 'KCNMB4', 'TRPC6', 'GUCY1A2', 'KCNMA1', 'SLC8A1', 'PRKG1']	['ATP2B4:-', 'IRAG1:-', 'NOS1:+', 'ITPR3:+', 'PDE10A:-', 'PDE1A:-', 'GNGT1:-', 'KCNMB4:+', 'TRPC6:+', 'GUCY1A2:+', 'KCNMA1:-', 'SLC8A1:+', 'PRKG1:+']
226	REACTOME_DISEASES_OF_METABOLISM	0.340959	0.0158728	['GCLC', 'CYP26B1', 'THSD7A', 'CYP24A1', 'VCAN', 'ADAMTS6', 'GPC4', 'PGM1', 'SEMA5A', 'MUC5B', 'SFTPA1', 'SDC4', 'SFTPD', 'ADAMTS8', 'THBS1', 'CYP1B1', 'ADAMTS14', 'LUM', 'ADAMTS17', 'ADAMTS18', 'THSD7B', 'MUC4', 'ADAMTS16', 'GPC3', 'ADAMTS12', 'ADAMTS5', 'ADAMTS3', 'ADAMTSL3', 'SLC34A2', 'ACAN', 'ADAMTS9', 'ABCA3', 'SFTPC', 'SFTPB', 'CYP7B1', 'MUC13', 'ADAMTSL1', 'GPC5', 'MUC16', 'EXT1', 'BGN', …	['GCLC:-', 'CYP26B1:-', 'THSD7A:-', 'CYP24A1:-', 'VCAN:-', 'ADAMTS6:-', 'GPC4:-', 'PGM1:-', 'SEMA5A:+', 'MUC5B:-', 'SFTPA1:+', 'SDC4:-', 'SFTPD:+', 'ADAMTS8:+', 'THBS1:-', 'CYP1B1:-', 'ADAMTS14:-', 'LUM:-', 'ADAMTS17:+', 'ADAMTS18:-', 'THSD7B:-', 'MUC4:-', 'ADAMTS16:-', 'GPC3:+', 'ADAMTS12:-', 'ADAMTS5:-', 'ADAMTS3:-', 'ADAMTSL3:+', 'SLC34A2:-', 'ACAN:+', 'ADAMTS9:-', 'ABCA3:+', 'SFTPC:+', 'SFTPB…
227	REACTOME_C_TYPE_LECTIN_RECEPTORS_CLRS	0.34076	0.0161179	['PAK3', 'ITPR3', 'NFATC2', 'CCL22', 'ICAM2', 'MUC5B', 'MUC4', 'MUC13', 'MUC16', 'MUC6', 'MUC5AC', 'LYN']	['PAK3:-', 'ITPR3:+', 'NFATC2:-', 'CCL22:-', 'ICAM2:-', 'MUC5B:-', 'MUC4:-', 'MUC13:-', 'MUC16:-', 'MUC6:+', 'MUC5AC:-', 'LYN:-']
228	REACTOME_RHO_GTPASES_ACTIVATE_PKNS	0.340412	0.0164867	['MYH14', 'MYH10', 'MYH11', 'SFN']	['MYH14:-', 'MYH10:+', 'MYH11:-', 'SFN:-']
229	WP_MICRORNAS_IN_CARDIOMYOCYTE_HYPERTROPHY	0.33813	0.0185013	['NRG1', 'IGF1', 'EDN1', 'PLA2G2A', 'MYLK', 'PRKCB', 'PRKG1', 'MAPK4', 'EGF', 'FGF2', 'LIF', 'HDAC9', 'FGFR2']	['NRG1:-', 'IGF1:-', 'EDN1:-', 'PLA2G2A:-', 'MYLK:+', 'PRKCB:-', 'PRKG1:+', 'MAPK4:+', 'EGF:-', 'FGF2:-', 'LIF:-', 'HDAC9:+', 'FGFR2:-']
230	REACTOME_ROLE_OF_SECOND_MESSENGERS_IN_NETRIN_1_SIGNALING	0.336807	0.0198161	['NTN1', 'TRPC4', 'TRPC6', 'DCC']	['NTN1:-', 'TRPC4:-', 'TRPC6:+', 'DCC:+']
231	WP_ECTODERM_DIFFERENTIATION	0.33661	0.0201197	['PTPN13', 'BOC', 'NLGN1', 'FHL2', 'ANKS1B', 'SHH', 'CCL2', 'SNCA', 'ABCC4', 'LDB2', 'TNFRSF11B', 'CTNND2', 'PTPRB', 'DMD', 'STC1', 'CDH8', 'CDH6', 'CAP2', 'ST8SIA4', 'TOX3', 'TCF7L1', 'EDA', 'ROR2', 'SORCS1', 'SMURF1', 'GREB1', 'PGM1', 'KRT6A', 'PLCXD3', 'FGFR2', 'ASTN1']	['PTPN13:-', 'BOC:-', 'NLGN1:-', 'FHL2:-', 'ANKS1B:-', 'SHH:-', 'CCL2:-', 'SNCA:+', 'ABCC4:+', 'LDB2:-', 'TNFRSF11B:-', 'CTNND2:+', 'PTPRB:+', 'DMD:-', 'STC1:-', 'CDH8:+', 'CDH6:-', 'CAP2:-', 'ST8SIA4:-', 'TOX3:-', 'TCF7L1:-', 'EDA:+', 'ROR2:-', 'SORCS1:-', 'SMURF1:-', 'GREB1:-', 'PGM1:-', 'KRT6A:-', 'PLCXD3:+', 'FGFR2:-', 'ASTN1:-']
232	KEGG_BLADDER_CANCER	0.336122	0.0207104	['EGFR', 'EGF', 'VEGFC', 'CXCL8', 'MMP1', 'MMP9', 'MDM2', 'DAPK2', 'DAPK1', 'THBS1', 'CDH1']	['EGFR:+', 'EGF:-', 'VEGFC:+', 'CXCL8:-', 'MMP1:-', 'MMP9:-', 'MDM2:-', 'DAPK2:+', 'DAPK1:+', 'THBS1:-', 'CDH1:-']
233	NABA_ECM_REGULATORS	0.336013	0.0209405	['ADAM12', 'ADAM23', 'ADAM28', 'ADAMTS12', 'ADAMTS14', 'ADAMTS16', 'ADAMTS17', 'ADAMTS18', 'ADAMTS3', 'ADAMTS5', 'ADAMTS6', 'ADAMTS8', 'ADAMTS9', 'ADAMTSL1', 'ADAMTSL2', 'ADAMTSL3', 'BMP1', 'CTSE', 'CTSH', 'CTSV', 'EGLN3', 'FAM20A', 'FAM20C', 'HPSE2', 'P3H2', 'LOXL4', 'MMP1', 'MMP10', 'MMP11', 'MMP16', 'MMP19', 'MMP28', 'MMP7', 'MMP9', 'PAMR1', 'PAPPA', 'PAPPA2', 'PCSK5', 'PCSK6', 'PLAT', 'PLAU',…	['ADAM12:-', 'ADAM23:-', 'ADAM28:-', 'ADAMTS12:-', 'ADAMTS14:-', 'ADAMTS16:-', 'ADAMTS17:+', 'ADAMTS18:-', 'ADAMTS3:-', 'ADAMTS5:-', 'ADAMTS6:-', 'ADAMTS8:+', 'ADAMTS9:-', 'ADAMTSL1:-', 'ADAMTSL2:-', 'ADAMTSL3:+', 'BMP1:-', 'CTSE:-', 'CTSH:+', 'CTSV:-', 'EGLN3:-', 'FAM20A:-', 'FAM20C:-', 'HPSE2:-', 'P3H2:+', 'LOXL4:-', 'MMP1:-', 'MMP10:-', 'MMP11:-', 'MMP16:-', 'MMP19:-', 'MMP28:-', 'MMP7:-', 'MM…
234	KEGG_HUNTINGTONS_DISEASE	0.335966	0.0211125	['PPARGC1A', 'CREB3L1', 'DNAI1', 'BDNF', 'DNAH2', 'GRM5', 'PLCB1', 'DNAI2', 'IFT57', 'GRIN2B', 'SOD2', 'CREB5', 'DNAH3', 'PPARG']	['PPARGC1A:+', 'CREB3L1:-', 'DNAI1:-', 'BDNF:+', 'DNAH2:-', 'GRM5:-', 'PLCB1:-', 'DNAI2:-', 'IFT57:-', 'GRIN2B:+', 'SOD2:+', 'CREB5:+', 'DNAH3:-', 'PPARG:+']
235	REACTOME_POST_TRANSLATIONAL_MODIFICATION_SYNTHESIS_OF_GPI_ANCHORED_PROTEINS	0.335329	0.021885	['PLAUR', 'VNN3', 'VNN1', 'CPM', 'MDGA2', 'CNTN4', 'LYPD6B', 'ALPL', 'NTNG1', 'LY6D', 'NEGR1', 'NTM', 'OPCML', 'LSAMP', 'RTN4RL1', 'PGAP1']	['PLAUR:-', 'VNN3:-', 'VNN1:-', 'CPM:+', 'MDGA2:-', 'CNTN4:+', 'LYPD6B:-', 'ALPL:-', 'NTNG1:+', 'LY6D:-', 'NEGR1:-', 'NTM:+', 'OPCML:-', 'LSAMP:+', 'RTN4RL1:-', 'PGAP1:+']
236	REACTOME_MECP2_REGULATES_NEURONAL_RECEPTORS_AND_CHANNELS	0.335034	0.0223246	['MET', 'GRIN2A', 'PTPN1', 'GRIN2B']	['MET:-', 'GRIN2A:-', 'PTPN1:-', 'GRIN2B:+']
237	WP_CHOLESTEROL_METABOLISM_WITH_BLOCH_AND_KANDUTSCHRUSSELL_PATHWAYS	0.335009	0.0224866	['CH25H', 'HMGCS1', 'MSMO1', 'ABCA1', 'ACSL4', 'ELOVL5', 'SCD']	['CH25H:-', 'HMGCS1:+', 'MSMO1:+', 'ABCA1:+', 'ACSL4:-', 'ELOVL5:-', 'SCD:+']
238	WP_SEROTONIN_AND_ANXIETY	0.333809	0.023928	['ADRA1A', 'PRKCB', 'CAMK2B']	['ADRA1A:+', 'PRKCB:-', 'CAMK2B:-']
239	WP_PPAR_SIGNALING_PATHWAY	0.333803	0.0240826	['ANGPTL4', 'SORBS1', 'PPARG', 'SCD', 'ME1', 'FABP6', 'FABP4', 'SLC27A2', 'ACADL', 'ACSL4', 'MMP1', 'CD36']	['ANGPTL4:-', 'SORBS1:+', 'PPARG:+', 'SCD:+', 'ME1:-', 'FABP6:-', 'FABP4:-', 'SLC27A2:-', 'ACADL:+', 'ACSL4:-', 'MMP1:-', 'CD36:+']
240	WP_16P112_PROXIMAL_DELETION_SYNDROME	0.333754	0.0242876	['IGFBP3', 'UNC13B', 'DOC2A', 'PPP4R4', 'PPARG', 'EZR']	['IGFBP3:-', 'UNC13B:+', 'DOC2A:-', 'PPP4R4:+', 'PPARG:+', 'EZR:-']
241	REACTOME_RND1_GTPASE_CYCLE	0.333408	0.0248351	['FAM135A', 'CAV1', 'RRAS2', 'PTPN13', 'RND1', 'MUC13']	['FAM135A:-', 'CAV1:-', 'RRAS2:+', 'PTPN13:-', 'RND1:+', 'MUC13:-']
242	KEGG_DILATED_CARDIOMYOPATHY	0.3333	0.0251166	['CACNB2', 'ADCY8', 'CACNB4', 'ADCY5', 'ITGA9', 'IGF1', 'RYR2', 'CACNG6', 'TPM1', 'ITGA11', 'DMD', 'CACNA2D3', 'CACNA1D', 'SLC8A1', 'CACNA1C', 'CACNA2D2', 'ITGB6', 'SGCD', 'ITGA8', 'LAMA2', 'TGFB2', 'ADCY2', 'ITGB8', 'TTN', 'ITGA6', 'ITGA2', 'ITGA1', 'CACNG4', 'DES']	['CACNB2:+', 'ADCY8:+', 'CACNB4:+', 'ADCY5:-', 'ITGA9:-', 'IGF1:-', 'RYR2:-', 'CACNG6:-', 'TPM1:-', 'ITGA11:-', 'DMD:-', 'CACNA2D3:+', 'CACNA1D:+', 'SLC8A1:+', 'CACNA1C:-', 'CACNA2D2:+', 'ITGB6:-', 'SGCD:-', 'ITGA8:+', 'LAMA2:-', 'TGFB2:+', 'ADCY2:-', 'ITGB8:-', 'TTN:+', 'ITGA6:-', 'ITGA2:-', 'ITGA1:+', 'CACNG4:-', 'DES:-']
243	REACTOME_METABOLISM_OF_VITAMINS_AND_COFACTORS	0.332643	0.0260551	['CD38', 'PTGS2', 'GPC4', 'LRP2', 'VNN1', 'SDC4', 'PTGIS', 'LDLR', 'APOE', 'ENPP2', 'AOX1', 'PPCDC', 'GPC3', 'ENPP3', 'NMNAT2', 'MTHFD2L', 'GPC5', 'GPC6', 'RNLS', 'AKR1C1', 'ENPP1', 'SLC5A8', 'ACACA']	['CD38:-', 'PTGS2:-', 'GPC4:-', 'LRP2:+', 'VNN1:-', 'SDC4:-', 'PTGIS:-', 'LDLR:-', 'APOE:-', 'ENPP2:-', 'AOX1:+', 'PPCDC:+', 'GPC3:+', 'ENPP3:-', 'NMNAT2:-', 'MTHFD2L:-', 'GPC5:-', 'GPC6:-', 'RNLS:+', 'AKR1C1:-', 'ENPP1:-', 'SLC5A8:-', 'ACACA:+']
244	REACTOME_RHOD_GTPASE_CYCLE	0.330254	0.0292563	['PAK5', 'CAV1', 'FILIP1', 'AKAP12', 'DIAPH3', 'ARHGAP12']	['PAK5:+', 'CAV1:-', 'FILIP1:+', 'AKAP12:+', 'DIAPH3:+', 'ARHGAP12:+']
245	REACTOME_REDUCTION_OF_CYTOSOLIC_CA_LEVELS	0.32998	0.0298134	['ATP2B4', 'SLC8A1']	['ATP2B4:-', 'SLC8A1:+']
246	WP_ARRHYTHMOGENIC_RIGHT_VENTRICULAR_CARDIOMYOPATHY	0.32985	0.0301843	['ITGA9', 'CACNG6', 'TCF7L1', 'SLC8A1', 'ITGA11', 'ITGB6', 'SGCD', 'CTNNA3', 'LEF1', 'CACNG4', 'CDH2', 'DMD', 'CACNA1C', 'DES', 'CACNA1D', 'ITGB8', 'ITGA6', 'RYR2', 'CACNA2D2', 'ITGA1', 'ITGA2', 'CACNB2', 'CACNB4', 'CACNA2D3', 'LAMA2', 'ITGA8']	['ITGA9:-', 'CACNG6:-', 'TCF7L1:-', 'SLC8A1:+', 'ITGA11:-', 'ITGB6:-', 'SGCD:-', 'CTNNA3:-', 'LEF1:-', 'CACNG4:-', 'CDH2:-', 'DMD:-', 'CACNA1C:-', 'DES:-', 'CACNA1D:+', 'ITGB8:-', 'ITGA6:-', 'RYR2:-', 'CACNA2D2:+', 'ITGA1:+', 'ITGA2:-', 'CACNB2:+', 'CACNB4:+', 'CACNA2D3:+', 'LAMA2:-', 'ITGA8:+']
247	KEGG_ARRHYTHMOGENIC_RIGHT_VENTRICULAR_CARDIOMYOPATHY_ARVC	0.32985	0.0303803	['CACNB2', 'CACNB4', 'ITGA9', 'RYR2', 'CACNG6', 'LEF1', 'ITGA11', 'DMD', 'CACNA2D3', 'CACNA1D', 'SLC8A1', 'CACNA1C', 'CACNA2D2', 'ITGB6', 'CDH2', 'SGCD', 'ITGA8', 'LAMA2', 'ITGB8', 'ITGA6', 'ITGA2', 'ITGA1', 'CACNG4', 'TCF7L1', 'DES', 'CTNNA3']	['CACNB2:+', 'CACNB4:+', 'ITGA9:-', 'RYR2:-', 'CACNG6:-', 'LEF1:-', 'ITGA11:-', 'DMD:-', 'CACNA2D3:+', 'CACNA1D:+', 'SLC8A1:+', 'CACNA1C:-', 'CACNA2D2:+', 'ITGB6:-', 'CDH2:-', 'SGCD:-', 'ITGA8:+', 'LAMA2:-', 'ITGB8:-', 'ITGA6:-', 'ITGA2:-', 'ITGA1:+', 'CACNG4:-', 'TCF7L1:-', 'DES:-', 'CTNNA3:-']
248	BIOCARTA_NOS1_PATHWAY	0.328614	0.0323371	['GRIN2A', 'PRKCB', 'NOS1', 'GRIN2B']	['GRIN2A:-', 'PRKCB:-', 'NOS1:+', 'GRIN2B:+']
249	REACTOME_SIGNALING_BY_TYPE_1_INSULIN_LIKE_GROWTH_FACTOR_1_RECEPTOR_IGF1R	0.327831	0.0337157	['IGF1', 'FGFR2', 'FGF10', 'FGF1', 'KLB', 'CILP', 'FGF2', 'FGF7']	['IGF1:-', 'FGFR2:-', 'FGF10:+', 'FGF1:-', 'KLB:+', 'CILP:-', 'FGF2:-', 'FGF7:-']
250	WP_COVID19_ADVERSE_OUTCOME_PATHWAY	0.32743	0.0345558	['TMPRSS2', 'CSF3', 'ACE2', 'IL2RA', 'IL6', 'CXCL8', 'CCL2', 'CXCL10']	['TMPRSS2:-', 'CSF3:+', 'ACE2:-', 'IL2RA:-', 'IL6:-', 'CXCL8:-', 'CCL2:-', 'CXCL10:-']
251	BIOCARTA_TID_PATHWAY	0.325751	0.0374853	['LIN7A', 'WT1']	['LIN7A:+', 'WT1:-']
252	REACTOME_FATTY_ACID_METABOLISM	0.32533	0.0384463	['ACSM3', 'ELOVL5', 'ACSL4', 'PTGS2', 'SCD', 'ACADL', 'PTGIS', 'CYP1B1', 'SLC27A2', 'SCD5', 'ACOXL', 'ALOX15', 'HPGD', 'FAAH2', 'ACSF2', 'ELOVL6', 'ALOX15B', 'ACACA']	['ACSM3:+', 'ELOVL5:-', 'ACSL4:-', 'PTGS2:-', 'SCD:+', 'ACADL:+', 'PTGIS:-', 'CYP1B1:-', 'SLC27A2:-', 'SCD5:-', 'ACOXL:+', 'ALOX15:-', 'HPGD:+', 'FAAH2:-', 'ACSF2:-', 'ELOVL6:-', 'ALOX15B:-', 'ACACA:+']
253	WP_CILIARY_LANDSCAPE	0.323805	0.0413924	['YAP1', 'UBE2H', 'SMC4', 'DOCK5', 'DYNLRB2', 'EXOC6', 'LCN2', 'TRAF3IP1', 'EFHC2', 'IFT57']	['YAP1:+', 'UBE2H:-', 'SMC4:+', 'DOCK5:-', 'DYNLRB2:-', 'EXOC6:-', 'LCN2:-', 'TRAF3IP1:-', 'EFHC2:-', 'IFT57:-']
254	PID_TCPTP_PATHWAY	0.323458	0.0423113	['PTPN1', 'KDR', 'EGF', 'ITGA1', 'INSR', 'MET', 'EGFR']	['PTPN1:-', 'KDR:+', 'EGF:-', 'ITGA1:+', 'INSR:-', 'MET:-', 'EGFR:+']
255	WP_LUNG_FIBROSIS	0.323011	0.04344	['CCL4', 'SFTPA1', 'SERPINA1', 'HMOX1', 'IGF1', 'CCL2', 'SFTPC', 'SFTPA2', 'MUC5B', 'IL6', 'ATP11A', 'EDN1', 'FAM13A', 'SPP1', 'CSF3', 'FGF7', 'CSF2', 'CXCL2', 'ELN', 'FGF2', 'EGF', 'FGF1', 'CXCL8', 'TIMP1', 'CCN2', 'PTX3', 'GREM1', 'PLAU', 'MMP9']	['CCL4:-', 'SFTPA1:+', 'SERPINA1:-', 'HMOX1:+', 'IGF1:-', 'CCL2:-', 'SFTPC:+', 'SFTPA2:+', 'MUC5B:-', 'IL6:-', 'ATP11A:+', 'EDN1:-', 'FAM13A:-', 'SPP1:-', 'CSF3:+', 'FGF7:-', 'CSF2:+', 'CXCL2:-', 'ELN:-', 'FGF2:-', 'EGF:-', 'FGF1:-', 'CXCL8:-', 'TIMP1:-', 'CCN2:-', 'PTX3:-', 'GREM1:-', 'PLAU:-', 'MMP9:-']
256	REACTOME_SENSORY_PROCESSING_OF_SOUND_BY_OUTER_HAIR_CELLS_OF_THE_COCHLEA	0.322607	0.0445135	['MYO3B', 'KCNN2', 'EPB41L3', 'EPB41L1', 'EZR', 'RIPOR2', 'CLIC5', 'PCDH15', 'EPS8', 'KCNMA1']	['MYO3B:-', 'KCNN2:-', 'EPB41L3:+', 'EPB41L1:-', 'EZR:-', 'RIPOR2:+', 'CLIC5:+', 'PCDH15:+', 'EPS8:-', 'KCNMA1:-']
257	REACTOME_AMYLOID_FIBER_FORMATION	0.322348	0.0453299	['LTF', 'SNCAIP', 'LYZ', 'TGFBI', 'APOE', 'MFGE8', 'SNCA', 'TSPAN5', 'FGA', 'SAA1']	['LTF:-', 'SNCAIP:-', 'LYZ:-', 'TGFBI:-', 'APOE:-', 'MFGE8:-', 'SNCA:+', 'TSPAN5:-', 'FGA:-', 'SAA1:-']
258	REACTOME_RHOA_GTPASE_CYCLE	0.320955	0.0484782	['ARHGAP44', 'ANLN', 'ARHGAP6', 'CAV1', 'RASGRF2', 'ARHGEF2', 'CIT', 'FAM13A', 'DIAPH3', 'KALRN', 'DLC1', 'ARHGAP42', 'PCDH7', 'AKAP13']	['ARHGAP44:+', 'ANLN:-', 'ARHGAP6:+', 'CAV1:-', 'RASGRF2:-', 'ARHGEF2:+', 'CIT:-', 'FAM13A:-', 'DIAPH3:+', 'KALRN:+', 'DLC1:+', 'ARHGAP42:-', 'PCDH7:-', 'AKAP13:+']
259	REACTOME_DEATH_RECEPTOR_SIGNALLING	0.320618	0.049531	['BIRC3', 'RASGRF2', 'ARHGEF26', 'ARHGEF2', 'NGF', 'KALRN', 'SQSTM1', 'AKAP13', 'ARHGEF38']	['BIRC3:-', 'RASGRF2:-', 'ARHGEF26:+', 'ARHGEF2:+', 'NGF:+', 'KALRN:+', 'SQSTM1:+', 'AKAP13:+', 'ARHGEF38:+']

## Sheet: 4_pathway_perturbations
Perturbation Results Based on the FibAlv-4 track, Ranked by Perturbation Score: The adjusted p-value (pval_adjusted) is calculated using the perturbation results of a thousand 20-random gene combinations as the background. "Target_genes" are the genes regulated by the pathway. "Idrem_suggestion" refers to the direction of gene regulations that could inhibit IPF progression, as indicated by IDREM …
	pathways	perturbation score	pval_adjusted	target_genes	idrem_suggestion
0	REACTOME_NETRIN_1_SIGNALING	0.654762	3.46985e-19	['NTN1', 'PRKCQ', 'NTN4', 'EZR', 'TRPC4', 'TRPC6', 'SLIT2', 'UNC5D', 'ROBO1', 'DSCAML1', 'UNC5C', 'SLIT3', 'DCC']	['NTN1:-', 'PRKCQ:-', 'NTN4:+', 'EZR:-', 'TRPC4:-', 'TRPC6:+', 'SLIT2:+', 'UNC5D:+', 'ROBO1:-', 'DSCAML1:+', 'UNC5C:-', 'SLIT3:+', 'DCC:+']
1	PID_SYNDECAN_1_PATHWAY	0.623928	5.3577e-17	['COL6A3', 'MET', 'COL7A1', 'MMP1', 'COL11A1', 'COL1A2', 'COL5A2', 'COL4A3', 'COL12A1', 'COL10A1', 'COL5A1', 'COL3A1', 'COL4A4', 'COL14A1', 'COL8A1', 'MMP9', 'COL4A1', 'MMP7', 'COL15A1', 'COL1A1', 'COL17A1', 'COL4A6']	['COL6A3:-', 'MET:-', 'COL7A1:-', 'MMP1:-', 'COL11A1:-', 'COL1A2:-', 'COL5A2:-', 'COL4A3:+', 'COL12A1:-', 'COL10A1:-', 'COL5A1:-', 'COL3A1:-', 'COL4A4:+', 'COL14A1:-', 'COL8A1:-', 'MMP9:-', 'COL4A1:-', 'MMP7:-', 'COL15A1:-', 'COL1A1:-', 'COL17A1:-', 'COL4A6:-']
2	KEGG_CARDIAC_MUSCLE_CONTRACTION	0.598631	2.61605e-15	['CACNB2', 'CACNB4', 'RYR2', 'CACNG6', 'TPM1', 'ATP1B1', 'CACNA2D3', 'CACNA1D', 'SLC8A1', 'CACNA1C', 'CACNA2D2', 'CACNG4']	['CACNB2:+', 'CACNB4:+', 'RYR2:-', 'CACNG6:-', 'TPM1:-', 'ATP1B1:-', 'CACNA2D3:+', 'CACNA1D:+', 'SLC8A1:+', 'CACNA1C:-', 'CACNA2D2:+', 'CACNG4:-']
3	REACTOME_SENSORY_PERCEPTION	0.592815	6.2169e-15	['CACNA2D2', 'ANO2', 'PRKCQ', 'MYO3B', 'DHRS9', 'GPC4', 'KCNN2', 'LRP2', 'EPB41L3', 'EPB41L1', 'EZR', 'ITPR3', 'RIPOR2', 'CLIC5', 'SDC4', 'GNGT1', 'LDLR', 'APOE', 'SNAP25', 'SCN2A', 'GPC3', 'PCDH15', 'EPS8', 'SCN3A', 'KCNMA1', 'CACNA1D', 'CACNB2', 'SCNN1G', 'SCNN1B', 'GPC5', 'GPC6', 'PCLO', 'AKR1C1', 'ABCA4']	['CACNA2D2:+', 'ANO2:+', 'PRKCQ:-', 'MYO3B:-', 'DHRS9:-', 'GPC4:-', 'KCNN2:-', 'LRP2:+', 'EPB41L3:+', 'EPB41L1:-', 'EZR:-', 'ITPR3:+', 'RIPOR2:+', 'CLIC5:+', 'SDC4:-', 'GNGT1:-', 'LDLR:-', 'APOE:-', 'SNAP25:-', 'SCN2A:-', 'GPC3:+', 'PCDH15:+', 'EPS8:-', 'SCN3A:-', 'KCNMA1:-', 'CACNA1D:+', 'CACNB2:+', 'SCNN1G:-', 'SCNN1B:-', 'GPC5:-', 'GPC6:-', 'PCLO:+', 'AKR1C1:-', 'ABCA4:-']
4	WP_G_PROTEIN_SIGNALING_PATHWAYS	0.592187	6.84414e-15	['PDE4D', 'GNGT1', 'ADCY5', 'ADCY8', 'PDE1C', 'GNA14', 'AKAP12', 'AKAP6', 'PDE7B', 'AKAP13', 'PRKCB', 'PRKCZ', 'PRKCQ', 'PDE1A', 'ADCY2']	['PDE4D:+', 'GNGT1:-', 'ADCY5:-', 'ADCY8:+', 'PDE1C:+', 'GNA14:+', 'AKAP12:+', 'AKAP6:+', 'PDE7B:-', 'AKAP13:+', 'PRKCB:-', 'PRKCZ:+', 'PRKCQ:-', 'PDE1A:-', 'ADCY2:-']
5	REACTOME_REGULATION_OF_COMMISSURAL_AXON_PATHFINDING_BY_SLIT_AND_ROBO	0.589133	1.07427e-14	['NTN1', 'SLIT2', 'ROBO1', 'SLIT3', 'NELL2', 'ROBO2', 'DCC']	['NTN1:-', 'SLIT2:+', 'ROBO1:-', 'SLIT3:+', 'NELL2:-', 'ROBO2:+', 'DCC:+']
6	REACTOME_SIGNALING_BY_ROBO_RECEPTORS	0.58898	1.10275e-14	['NTN1', 'PAK3', 'PAK5', 'CXCL12', 'CAP2', 'FLRT3', 'SLIT2', 'ROBO1', 'SLIT3', 'NELL2', 'ROBO2', 'DCC', 'SRGAP3']	['NTN1:-', 'PAK3:-', 'PAK5:+', 'CXCL12:-', 'CAP2:-', 'FLRT3:+', 'SLIT2:+', 'ROBO1:-', 'SLIT3:+', 'NELL2:-', 'ROBO2:+', 'DCC:+', 'SRGAP3:-']
7	WP_HYPOTHESIZED_PATHWAYS_IN_PATHOGENESIS_OF_CARDIOVASCULAR_DISEASE	0.578584	4.94778e-14	['LTBP1', 'LTBP2', 'FBN2', 'FBN1', 'POSTN', 'SERPINE1', 'SMAD3', 'CCN2', 'ANGPT2', 'RUNX2']	['LTBP1:-', 'LTBP2:-', 'FBN2:-', 'FBN1:-', 'POSTN:-', 'SERPINE1:-', 'SMAD3:-', 'CCN2:-', 'ANGPT2:-', 'RUNX2:-']
8	PID_AVB3_INTEGRIN_PATHWAY	0.574659	8.65629e-14	['COL1A2', 'COL5A2', 'COL5A1', 'COL8A1', 'COL6A3', 'COL4A3', 'MFGE8', 'COL10A1', 'FGF2', 'EDIL3', 'COL11A1', 'COL15A1', 'COL4A1', 'COL17A1', 'COL7A1', 'COL1A1', 'SPP1', 'COL4A6', 'COL14A1', 'COL3A1', 'FN1', 'KDR', 'COL12A1', 'COL4A4']	['COL1A2:-', 'COL5A2:-', 'COL5A1:-', 'COL8A1:-', 'COL6A3:-', 'COL4A3:+', 'MFGE8:-', 'COL10A1:-', 'FGF2:-', 'EDIL3:+', 'COL11A1:-', 'COL15A1:-', 'COL4A1:-', 'COL17A1:-', 'COL7A1:-', 'COL1A1:-', 'SPP1:-', 'COL4A6:-', 'COL14A1:-', 'COL3A1:-', 'FN1:-', 'KDR:+', 'COL12A1:-', 'COL4A4:+']
9	WP_CALCIUM_REGULATION_IN_CARDIAC_CELLS	0.568642	2.01537e-13	['GNGT1', 'GJA5', 'ADCY5', 'ADCY8', 'RGS7', 'ATP1B1', 'RGS6', 'CACNA1A', 'CACNA1B', 'CACNA1C', 'CACNA1D', 'CACNA1E', 'CAMK2B', 'RYR3', 'RYR2', 'PKIB', 'CHRM3', 'CHRM2', 'ADRA1A', 'PKIA', 'GJC1', 'SLC8A1', 'PRKCB', 'ITPR3', 'GRK5', 'PRKCZ', 'PRKCQ', 'RGS4', 'SFN', 'ADCY2']	['GNGT1:-', 'GJA5:-', 'ADCY5:-', 'ADCY8:+', 'RGS7:-', 'ATP1B1:-', 'RGS6:+', 'CACNA1A:-', 'CACNA1B:-', 'CACNA1C:-', 'CACNA1D:+', 'CACNA1E:-', 'CAMK2B:-', 'RYR3:-', 'RYR2:-', 'PKIB:-', 'CHRM3:+', 'CHRM2:+', 'ADRA1A:+', 'PKIA:+', 'GJC1:-', 'SLC8A1:+', 'PRKCB:-', 'ITPR3:+', 'GRK5:+', 'PRKCZ:+', 'PRKCQ:-', 'RGS4:-', 'SFN:-', 'ADCY2:-']
10	KEGG_CALCIUM_SIGNALING_PATHWAY	0.543869	5.66074e-12	['PTGFR', 'PTGER3', 'TACR1', 'SLC8A1', 'ITPR3', 'EDNRB', 'CHRM2', 'MYLK', 'CHRM3', 'ADCY2', 'PDE1C', 'GNA14', 'CAMK2B', 'ATP2B4', 'GRM5', 'ADCY8', 'PLCB1', 'PRKCB', 'RYR2', 'RYR3', 'PDE1A', 'ERBB4', 'CACNA1A', 'GRIN2A', 'CACNA1D', 'CACNA1E', 'CACNA1B', 'CACNA1C', 'NOS1', 'EGFR', 'ADRA1A', 'CD38', 'HRH1']	['PTGFR:-', 'PTGER3:-', 'TACR1:-', 'SLC8A1:+', 'ITPR3:+', 'EDNRB:+', 'CHRM2:+', 'MYLK:+', 'CHRM3:+', 'ADCY2:-', 'PDE1C:+', 'GNA14:+', 'CAMK2B:-', 'ATP2B4:-', 'GRM5:-', 'ADCY8:+', 'PLCB1:-', 'PRKCB:-', 'RYR2:-', 'RYR3:-', 'PDE1A:-', 'ERBB4:+', 'CACNA1A:-', 'GRIN2A:-', 'CACNA1D:+', 'CACNA1E:-', 'CACNA1B:-', 'CACNA1C:-', 'NOS1:+', 'EGFR:+', 'ADRA1A:+', 'CD38:-', 'HRH1:-']
11	REACTOME_METABOLISM_OF_LIPIDS	0.536124	1.54182e-11	['ACSM3', 'ELOVL5', 'CYP24A1', 'MSMO1', 'ME1', 'PLPP1', 'ACSL4', 'OSBPL3', 'PTGS2', 'MGLL', 'OSBPL6', 'LRP2', 'HSD17B2', 'ACHE', 'SCD', 'LPIN2', 'STS', 'BMX', 'CAV1', 'AHR', 'PIP5K1B', 'ABCC3', 'INPP4B', 'PPARGC1A', 'ACSS3', 'HMGCS1', 'ACADL', 'FHL2', 'MOGAT1', 'PTGIS', 'PLA2G5', 'PPARG', 'CD36', 'BAAT', 'SLC44A5', 'CYP1B1', 'CH25H', 'GPAT3', 'PIK3C2G', 'SLC27A2', 'OSBPL10', 'PLA1A', 'SCD5', 'TNF…	['ACSM3:+', 'ELOVL5:-', 'CYP24A1:-', 'MSMO1:+', 'ME1:-', 'PLPP1:-', 'ACSL4:-', 'OSBPL3:-', 'PTGS2:-', 'MGLL:+', 'OSBPL6:-', 'LRP2:+', 'HSD17B2:+', 'ACHE:-', 'SCD:+', 'LPIN2:+', 'STS:-', 'BMX:-', 'CAV1:-', 'AHR:-', 'PIP5K1B:+', 'ABCC3:-', 'INPP4B:+', 'PPARGC1A:+', 'ACSS3:+', 'HMGCS1:+', 'ACADL:+', 'FHL2:-', 'MOGAT1:-', 'PTGIS:-', 'PLA2G5:-', 'PPARG:+', 'CD36:+', 'BAAT:-', 'SLC44A5:-', 'CYP1B1:-', …
12	WP_ACUTE_VIRAL_MYOCARDITIS	0.522638	8.37466e-11	['BCL2L1', 'NOS1', 'SGCD', 'IL6', 'EDN1', 'DMD', 'CAV1', 'LAMA2', 'MMP9', 'CD55']	['BCL2L1:-', 'NOS1:+', 'SGCD:-', 'IL6:-', 'EDN1:-', 'DMD:-', 'CAV1:-', 'LAMA2:-', 'MMP9:-', 'CD55:+']
13	REACTOME_RHOB_GTPASE_CYCLE	0.521113	1.01367e-10	['ANLN', 'CAV1', 'ARHGEF2', 'CIT', 'DIAPH3', 'DLC1', 'PCDH7', 'AKAP13']	['ANLN:-', 'CAV1:-', 'ARHGEF2:+', 'CIT:-', 'DIAPH3:+', 'DLC1:+', 'PCDH7:-', 'AKAP13:+']
14	REACTOME_MET_PROMOTES_CELL_MOTILITY	0.518443	1.40908e-10	['LAMC3', 'LAMA3', 'LAMC2', 'COL11A1', 'COL5A3', 'LAMB1', 'MET', 'COL1A1', 'FN1', 'COL5A1', 'TNS4', 'ITGA2', 'COL1A2', 'COL3A1', 'COL24A1', 'LAMA2', 'COL27A1', 'LAMB3', 'COL5A2']	['LAMC3:+', 'LAMA3:+', 'LAMC2:-', 'COL11A1:-', 'COL5A3:-', 'LAMB1:-', 'MET:-', 'COL1A1:-', 'FN1:-', 'COL5A1:-', 'TNS4:-', 'ITGA2:-', 'COL1A2:-', 'COL3A1:-', 'COL24A1:-', 'LAMA2:-', 'COL27A1:-', 'LAMB3:-', 'COL5A2:-']
15	PID_GLYPICAN_1PATHWAY	0.517482	1.58953e-10	['BLK', 'NRG1', 'FGF2', 'PLA2G2A', 'TGFB2', 'LYN', 'SLIT2', 'FLT1']	['BLK:-', 'NRG1:-', 'FGF2:-', 'PLA2G2A:-', 'TGFB2:+', 'LYN:-', 'SLIT2:+', 'FLT1:+']
16	REACTOME_ROLE_OF_ABL_IN_ROBO_SLIT_SIGNALING	0.516425	1.81343e-10	['CAP2', 'SLIT2', 'ROBO1']	['CAP2:-', 'SLIT2:+', 'ROBO1:-']
17	REACTOME_INACTIVATION_OF_CDC42_AND_RAC1	0.513104	2.71348e-10	['SLIT2', 'ROBO1', 'SRGAP3']	['SLIT2:+', 'ROBO1:-', 'SRGAP3:-']
18	REACTOME_MET_ACTIVATES_PTK2_SIGNALING	0.511652	3.2398e-10	['LAMC3', 'LAMA3', 'LAMC2', 'COL11A1', 'COL5A3', 'LAMB1', 'MET', 'COL1A1', 'FN1', 'COL5A1', 'ITGA2', 'COL1A2', 'COL3A1', 'COL24A1', 'LAMA2', 'COL27A1', 'LAMB3', 'COL5A2']	['LAMC3:+', 'LAMA3:+', 'LAMC2:-', 'COL11A1:-', 'COL5A3:-', 'LAMB1:-', 'MET:-', 'COL1A1:-', 'FN1:-', 'COL5A1:-', 'ITGA2:-', 'COL1A2:-', 'COL3A1:-', 'COL24A1:-', 'LAMA2:-', 'COL27A1:-', 'LAMB3:-', 'COL5A2:-']
19	REACTOME_COLLAGEN_CHAIN_TRIMERIZATION	0.508387	4.79006e-10	['COL23A1', 'COL11A1', 'COL17A1', 'COL5A3', 'COL4A4', 'COL1A1', 'COL12A1', 'COL7A1', 'COL10A1', 'COL21A1', 'COL5A1', 'COL4A2', 'COL8A1', 'COL6A3', 'COL1A2', 'COL3A1', 'COL4A3', 'COL22A1', 'COL24A1', 'COL4A1', 'COL14A1', 'COL25A1', 'COL27A1', 'COL4A6', 'COL5A2', 'COL15A1', 'COL6A6', 'COL28A1']	['COL23A1:-', 'COL11A1:-', 'COL17A1:-', 'COL5A3:-', 'COL4A4:+', 'COL1A1:-', 'COL12A1:-', 'COL7A1:-', 'COL10A1:-', 'COL21A1:-', 'COL5A1:-', 'COL4A2:-', 'COL8A1:-', 'COL6A3:-', 'COL1A2:-', 'COL3A1:-', 'COL4A3:+', 'COL22A1:-', 'COL24A1:-', 'COL4A1:-', 'COL14A1:-', 'COL25A1:-', 'COL27A1:-', 'COL4A6:-', 'COL5A2:-', 'COL15A1:-', 'COL6A6:+', 'COL28A1:-']
20	NABA_COLLAGENS	0.508387	4.80953e-10	['COL10A1', 'COL11A1', 'COL12A1', 'COL14A1', 'COL15A1', 'COL17A1', 'COL1A1', 'COL1A2', 'COL21A1', 'COL22A1', 'COL23A1', 'COL24A1', 'COL25A1', 'COL27A1', 'COL28A1', 'COL3A1', 'COL4A1', 'COL4A2', 'COL4A3', 'COL4A4', 'COL4A6', 'COL5A1', 'COL5A2', 'COL5A3', 'COL6A3', 'COL6A6', 'COL7A1', 'COL8A1']	['COL10A1:-', 'COL11A1:-', 'COL12A1:-', 'COL14A1:-', 'COL15A1:-', 'COL17A1:-', 'COL1A1:-', 'COL1A2:-', 'COL21A1:-', 'COL22A1:-', 'COL23A1:-', 'COL24A1:-', 'COL25A1:-', 'COL27A1:-', 'COL28A1:-', 'COL3A1:-', 'COL4A1:-', 'COL4A2:-', 'COL4A3:+', 'COL4A4:+', 'COL4A6:-', 'COL5A1:-', 'COL5A2:-', 'COL5A3:-', 'COL6A3:-', 'COL6A6:+', 'COL7A1:-', 'COL8A1:-']
21	WP_ROBO4_AND_VEGF_SIGNALING_PATHWAYS_CROSSTALK	0.503748	8.31652e-10	['SLIT2', 'KDR']	['SLIT2:+', 'KDR:+']
22	REACTOME_TRANSPORT_OF_SMALL_MOLECULES	0.503024	9.08284e-10	['CFTR', 'SLC7A2', 'CLCA4', 'CP', 'ANO2', 'NEDD4L', 'CAMK2B', 'ATP2B4', 'ATP2C2', 'SLC12A2', 'ATP11A', 'ABCC9', 'ATP12A', 'ADCY2', 'SLC4A4', 'TRPM3', 'ABCB1', 'FTL', 'SLC26A4', 'PCSK5', 'SLC5A1', 'HMOX1', 'LIPG', 'NALCN', 'SLC5A5', 'SLC1A1', 'ABCC3', 'SLC1A2', 'SLC16A10', 'ATP10B', 'ATP8A1', 'ABCC4', 'ATP13A4', 'GNGT1', 'LDLR', 'APOE', 'ANO1', 'ATP8A2', 'TRPC4', 'STOML3', 'UNC79', 'ANO3', 'TRPC6'…	['CFTR:+', 'SLC7A2:-', 'CLCA4:-', 'CP:-', 'ANO2:+', 'NEDD4L:+', 'CAMK2B:-', 'ATP2B4:-', 'ATP2C2:+', 'SLC12A2:-', 'ATP11A:+', 'ABCC9:-', 'ATP12A:-', 'ADCY2:-', 'SLC4A4:-', 'TRPM3:-', 'ABCB1:-', 'FTL:-', 'SLC26A4:-', 'PCSK5:-', 'SLC5A1:-', 'HMOX1:+', 'LIPG:-', 'NALCN:-', 'SLC5A5:-', 'SLC1A1:-', 'ABCC3:-', 'SLC1A2:-', 'SLC16A10:-', 'ATP10B:-', 'ATP8A1:+', 'ABCC4:+', 'ATP13A4:+', 'GNGT1:-', 'LDLR:-',…
23	REACTOME_SIGNALING_BY_GPCR	0.498955	1.45868e-09	['CX3CL1', 'CASR', 'PTGER3', 'NPFFR2', 'CAMK2B', 'DGKG', 'CALCRL', 'PRKCQ', 'MGLL', 'DGKD', 'ADCY2', 'EDN1', 'SCTR', 'CXCL2', 'PTHLH', 'ITPR3', 'GRK3', 'CCL22', 'VIPR2', 'C5', 'CXCL12', 'CCL2', 'PDE10A', 'RASGRF2', 'PDE4D', 'ARHGEF26', 'CCL20', 'PDE1A', 'TACR1', 'ARHGEF2', 'RGS4', 'PTCH2', 'PLPPR5', 'ADRA1A', 'PTGFR', 'RAMP3', 'C3', 'RGS13', 'EDN2', 'F2RL3', 'GNGT1', 'RGS22', 'NMUR2', 'CHRM3', 'G…	['CX3CL1:-', 'CASR:-', 'PTGER3:-', 'NPFFR2:+', 'CAMK2B:-', 'DGKG:+', 'CALCRL:+', 'PRKCQ:-', 'MGLL:+', 'DGKD:-', 'ADCY2:-', 'EDN1:-', 'SCTR:-', 'CXCL2:-', 'PTHLH:-', 'ITPR3:+', 'GRK3:-', 'CCL22:-', 'VIPR2:-', 'C5:+', 'CXCL12:-', 'CCL2:-', 'PDE10A:-', 'RASGRF2:-', 'PDE4D:+', 'ARHGEF26:+', 'CCL20:-', 'PDE1A:-', 'TACR1:-', 'ARHGEF2:+', 'RGS4:-', 'PTCH2:-', 'PLPPR5:+', 'ADRA1A:+', 'PTGFR:-', 'RAMP3:+'…
24	REACTOME_ACTIVATION_OF_RAC1	0.497463	1.73743e-09	['PAK3', 'PAK5', 'SLIT2', 'ROBO1']	['PAK3:-', 'PAK5:+', 'SLIT2:+', 'ROBO1:-']
25	REACTOME_COLLAGEN_BIOSYNTHESIS_AND_MODIFYING_ENZYMES	0.491301	3.50356e-09	['TLL1', 'COL23A1', 'COL11A1', 'COL17A1', 'COL5A3', 'COL4A4', 'P3H2', 'COL1A1', 'COL12A1', 'COL7A1', 'COL10A1', 'COL21A1', 'COL5A1', 'COL4A2', 'ADAMTS14', 'COL8A1', 'PLOD2', 'ADAMTS3', 'COL6A3', 'COL1A2', 'BMP1', 'COL3A1', 'COL4A3', 'COL22A1', 'COL24A1', 'COL4A1', 'COL14A1', 'COL25A1', 'COL27A1', 'COL4A6', 'COL5A2', 'COL15A1', 'COL6A6', 'COL28A1']	['TLL1:+', 'COL23A1:-', 'COL11A1:-', 'COL17A1:-', 'COL5A3:-', 'COL4A4:+', 'P3H2:+', 'COL1A1:-', 'COL12A1:-', 'COL7A1:-', 'COL10A1:-', 'COL21A1:-', 'COL5A1:-', 'COL4A2:-', 'ADAMTS14:-', 'COL8A1:-', 'PLOD2:-', 'ADAMTS3:-', 'COL6A3:-', 'COL1A2:-', 'BMP1:-', 'COL3A1:-', 'COL4A3:+', 'COL22A1:-', 'COL24A1:-', 'COL4A1:-', 'COL14A1:-', 'COL25A1:-', 'COL27A1:-', 'COL4A6:-', 'COL5A2:-', 'COL15A1:-', 'COL6A…
26	REACTOME_G_ALPHA_I_SIGNALLING_EVENTS	0.490449	3.87009e-09	['CX3CL1', 'CASR', 'PTGER3', 'CAMK2B', 'ADCY2', 'CXCL2', 'ITPR3', 'C5', 'CXCL12', 'PDE4D', 'CCL20', 'PDE1A', 'RGS4', 'C3', 'RGS13', 'GNGT1', 'RGS22', 'NMUR2', 'APLNR', 'ANXA1', 'GABBR2', 'CCL21', 'CXCL9', 'PDE1C', 'ADCY8', 'GNA14', 'CXCL3', 'CXCL1', 'CXCL10', 'CXCL11', 'CXCL8', 'LPAR3', 'CCL19', 'NBEA', 'ADCY5', 'SAA1', 'P2RY14', 'HTR1F', 'GRM8', 'AGTR2', 'CHRM2', 'PLCB1', 'RGS6', 'RGS7', 'GRM7',…	['CX3CL1:-', 'CASR:-', 'PTGER3:-', 'CAMK2B:-', 'ADCY2:-', 'CXCL2:-', 'ITPR3:+', 'C5:+', 'CXCL12:-', 'PDE4D:+', 'CCL20:-', 'PDE1A:-', 'RGS4:-', 'C3:-', 'RGS13:-', 'GNGT1:-', 'RGS22:-', 'NMUR2:+', 'APLNR:-', 'ANXA1:-', 'GABBR2:-', 'CCL21:-', 'CXCL9:+', 'PDE1C:+', 'ADCY8:+', 'GNA14:+', 'CXCL3:-', 'CXCL1:-', 'CXCL10:-', 'CXCL11:-', 'CXCL8:-', 'LPAR3:-', 'CCL19:-', 'NBEA:-', 'ADCY5:-', 'SAA1:-', 'P2RY…
27	REACTOME_REGULATION_OF_EXPRESSION_OF_SLITS_AND_ROBOS	0.490073	4.05308e-09	['SLIT2', 'ROBO1', 'ROBO2']	['SLIT2:+', 'ROBO1:-', 'ROBO2:+']
28	WP_DEVELOPMENT_OF_URETERIC_COLLECTION_SYSTEM	0.489614	4.28387e-09	['CELSR1', 'TGFB2', 'GREB1L', 'SHH', 'SLIT2', 'WT1', 'GFRA1', 'FREM2', 'GPC3', 'ROBO2', 'ROBO1', 'GRIP1', 'HNF1B', 'BMP2', 'FRAS1', 'BMP5', 'BMPER', 'ANOS1', 'FGFR2', 'EYA1', 'CRIM1', 'ITGA8', 'GLI2']	['CELSR1:-', 'TGFB2:+', 'GREB1L:-', 'SHH:-', 'SLIT2:+', 'WT1:-', 'GFRA1:-', 'FREM2:+', 'GPC3:+', 'ROBO2:+', 'ROBO1:-', 'GRIP1:-', 'HNF1B:-', 'BMP2:-', 'FRAS1:+', 'BMP5:-', 'BMPER:+', 'ANOS1:+', 'FGFR2:-', 'EYA1:-', 'CRIM1:+', 'ITGA8:+', 'GLI2:-']
29	REACTOME_NEURONAL_SYSTEM	0.486802	5.87811e-09	['ABCC8', 'CACNA2D2', 'NRXN3', 'RASGRF1', 'CAMK2B', 'SYT1', 'ABCC9', 'CACNG4', 'ADCY2', 'RIMS1', 'KCNN2', 'EPB41L3', 'ACHE', 'EPB41L1', 'NCALD', 'SLC1A1', 'APBA1', 'SLC6A4', 'SLC1A2', 'SYT10', 'LIN7A', 'RASGRF2', 'EPB41L5', 'GLS', 'GNGT1', 'SNAP25', 'KCNMB4', 'MDM2', 'KCNK1', 'GABBR2', 'PPFIA2', 'NTRK3', 'CACNA1A', 'KCNH1', 'GABRB2', 'NLGN4X', 'CACNA1B', 'GRIK4', 'DLG2', 'HOMER1', 'PTPRD', 'KCNJ1…	['ABCC8:+', 'CACNA2D2:+', 'NRXN3:+', 'RASGRF1:+', 'CAMK2B:-', 'SYT1:-', 'ABCC9:-', 'CACNG4:-', 'ADCY2:-', 'RIMS1:+', 'KCNN2:-', 'EPB41L3:+', 'ACHE:-', 'EPB41L1:-', 'NCALD:+', 'SLC1A1:-', 'APBA1:-', 'SLC6A4:+', 'SLC1A2:-', 'SYT10:-', 'LIN7A:+', 'RASGRF2:-', 'EPB41L5:+', 'GLS:+', 'GNGT1:-', 'SNAP25:-', 'KCNMB4:+', 'MDM2:-', 'KCNK1:-', 'GABBR2:-', 'PPFIA2:-', 'NTRK3:-', 'CACNA1A:-', 'KCNH1:-', 'GABR…
30	WP_GDNFRET_SIGNALING_AXIS	0.486381	6.1844e-09	['SLIT2', 'ROBO2', 'AGTR2', 'EYA1', 'GFRA1', 'GREM1']	['SLIT2:+', 'ROBO2:+', 'AGTR2:-', 'EYA1:-', 'GFRA1:-', 'GREM1:-']
31	WP_GLUCOCORTICOID_RECEPTOR_PATHWAY	0.483644	8.39107e-09	['FGFBP1', 'DNAJC15', 'CCL2', 'ANGPTL4', 'CCL20', 'THBD', 'S100P', 'TNS4', 'EDN2', 'PTGS2', 'PPP1R14C', 'BIRC3', 'ANKRD1', 'NAV3', 'ENC1', 'MFGE8', 'ABHD2', 'AKAP13']	['FGFBP1:-', 'DNAJC15:-', 'CCL2:-', 'ANGPTL4:-', 'CCL20:-', 'THBD:+', 'S100P:-', 'TNS4:-', 'EDN2:-', 'PTGS2:-', 'PPP1R14C:-', 'BIRC3:-', 'ANKRD1:+', 'NAV3:+', 'ENC1:-', 'MFGE8:-', 'ABHD2:-', 'AKAP13:+']
32	REACTOME_G_ALPHA_Q_SIGNALLING_EVENTS	0.481152	1.10568e-08	['CASR', 'NPFFR2', 'DGKG', 'PRKCQ', 'MGLL', 'DGKD', 'EDN1', 'ITPR3', 'TACR1', 'RGS4', 'ADRA1A', 'PTGFR', 'RGS13', 'EDN2', 'F2RL3', 'GNGT1', 'NMUR2', 'CHRM3', 'GRP', 'ANXA1', 'EDNRB', 'DGKB', 'TRPC6', 'EGFR', 'GNA14', 'DGKI', 'KALRN', 'GRM5', 'LPAR3', 'RASGRP1', 'SAA1', 'PLCB1', 'GPR132', 'GPR39', 'HRH1', 'LPAR1', 'GRK5', 'CCL23']	['CASR:-', 'NPFFR2:+', 'DGKG:+', 'PRKCQ:-', 'MGLL:+', 'DGKD:-', 'EDN1:-', 'ITPR3:+', 'TACR1:-', 'RGS4:-', 'ADRA1A:+', 'PTGFR:-', 'RGS13:-', 'EDN2:-', 'F2RL3:-', 'GNGT1:-', 'NMUR2:+', 'CHRM3:+', 'GRP:-', 'ANXA1:-', 'EDNRB:+', 'DGKB:-', 'TRPC6:+', 'EGFR:+', 'GNA14:+', 'DGKI:-', 'KALRN:+', 'GRM5:-', 'LPAR3:-', 'RASGRP1:-', 'SAA1:-', 'PLCB1:-', 'GPR132:-', 'GPR39:-', 'HRH1:-', 'LPAR1:+', 'GRK5:+', 'C…
33	WP_NUCLEAR_RECEPTORS_METAPATHWAY	0.479782	1.28822e-08	['FGFBP1', 'SERPINA1', 'NRG1', 'CYP3A5', 'PPARGC1A', 'CCL2', 'CCL20', 'EDN2', 'ME1', 'ANKRD1', 'ABHD2', 'UGT2B7', 'DNAJC15', 'SLC6A20', 'SLC5A8', 'S100P', 'PTGS2', 'AGER', 'EGFR', 'MYOF', 'FGF13', 'SLC6A14', 'TGFB2', 'AHR', 'ABCC4', 'ANGPTL4', 'THBD', 'EPHA3', 'TNS4', 'SLC6A4', 'SLC5A1', 'GCLC', 'SLC5A5', 'MFGE8', 'ABCC3', 'CAP2', 'AKAP13', 'SLC39A8', 'HMOX1', 'SLC7A11', 'CYP1B1', 'FTL', 'MGST1',…	['FGFBP1:-', 'SERPINA1:-', 'NRG1:-', 'CYP3A5:+', 'PPARGC1A:+', 'CCL2:-', 'CCL20:-', 'EDN2:-', 'ME1:-', 'ANKRD1:+', 'ABHD2:-', 'UGT2B7:-', 'DNAJC15:-', 'SLC6A20:+', 'SLC5A8:-', 'S100P:-', 'PTGS2:-', 'AGER:+', 'EGFR:+', 'MYOF:-', 'FGF13:-', 'SLC6A14:+', 'TGFB2:+', 'AHR:-', 'ABCC4:+', 'ANGPTL4:-', 'THBD:+', 'EPHA3:-', 'TNS4:-', 'SLC6A4:+', 'SLC5A1:-', 'GCLC:-', 'SLC5A5:-', 'MFGE8:-', 'ABCC3:-', 'CAP…
34	REACTOME_REGULATION_OF_INSULIN_SECRETION	0.477585	1.63928e-08	['ABCC8', 'CACNA2D2', 'ACSL4', 'ITPR3', 'GNGT1', 'SNAP25', 'CHRM3', 'CD36', 'CACNA1A', 'CACNA1C', 'ADCY8', 'GNA14', 'CACNA1D', 'CACNB2', 'KCNS3', 'ADCY5', 'PLCB1', 'CACNA1E']	['ABCC8:+', 'CACNA2D2:+', 'ACSL4:-', 'ITPR3:+', 'GNGT1:-', 'SNAP25:-', 'CHRM3:+', 'CD36:+', 'CACNA1A:-', 'CACNA1C:-', 'ADCY8:+', 'GNA14:+', 'CACNA1D:+', 'CACNB2:+', 'KCNS3:-', 'ADCY5:-', 'PLCB1:-', 'CACNA1E:-']
35	REACTOME_INTEGRATION_OF_ENERGY_METABOLISM	0.477092	1.73581e-08	['ABCC8', 'CACNA2D2', 'ACSL4', 'ADCY2', 'ITPR3', 'GNGT1', 'SNAP25', 'CHRM3', 'CD36', 'CACNA1A', 'CACNA1C', 'ADCY8', 'GNA14', 'CACNA1D', 'CACNB2', 'KCNS3', 'ADCY5', 'PLCB1', 'CACNA1E', 'ACACA']	['ABCC8:+', 'CACNA2D2:+', 'ACSL4:-', 'ADCY2:-', 'ITPR3:+', 'GNGT1:-', 'SNAP25:-', 'CHRM3:+', 'CD36:+', 'CACNA1A:-', 'CACNA1C:-', 'ADCY8:+', 'GNA14:+', 'CACNA1D:+', 'CACNB2:+', 'KCNS3:-', 'ADCY5:-', 'PLCB1:-', 'CACNA1E:-', 'ACACA:+']
36	KEGG_AXON_GUIDANCE	0.476383	1.88079e-08	['SEMA4A', 'ROBO1', 'SLIT2', 'ROBO2', 'SEMA6D', 'NTNG1', 'SEMA6A', 'SRGAP3', 'RND1', 'MET', 'SLIT3', 'PAK5', 'NTN1', 'LRRC4C', 'SEMA3C', 'CXCL12', 'SEMA5A', 'NFATC2', 'DCC', 'UNC5D', 'PAK3', 'SEMA3D', 'EPHB2', 'EFNA5', 'EFNB2', 'SEMA3A', 'UNC5C', 'SEMA3E', 'NTN4', 'EPHA7', 'EPHA3', 'EPHA4', 'EPHA6']	['SEMA4A:+', 'ROBO1:-', 'SLIT2:+', 'ROBO2:+', 'SEMA6D:+', 'NTNG1:+', 'SEMA6A:+', 'SRGAP3:-', 'RND1:+', 'MET:-', 'SLIT3:+', 'PAK5:+', 'NTN1:-', 'LRRC4C:-', 'SEMA3C:-', 'CXCL12:-', 'SEMA5A:+', 'NFATC2:-', 'DCC:+', 'UNC5D:+', 'PAK3:-', 'SEMA3D:-', 'EPHB2:-', 'EFNA5:-', 'EFNB2:+', 'SEMA3A:-', 'UNC5C:-', 'SEMA3E:+', 'NTN4:+', 'EPHA7:+', 'EPHA3:-', 'EPHA4:-', 'EPHA6:+']
37	REACTOME_O_LINKED_GLYCOSYLATION	0.469262	4.01124e-08	['THSD7A', 'ADAMTS6', 'ST6GAL1', 'SEMA5A', 'MUC5B', 'ADAMTS8', 'GALNT5', 'THBS1', 'ADAMTS14', 'ADAMTS17', 'ADAMTS18', 'THSD7B', 'GALNT13', 'MUC4', 'ADAMTS16', 'ADAMTS12', 'ADAMTS5', 'ADAMTS3', 'ADAMTSL3', 'GALNT14', 'ADAMTS9', 'GALNT10', 'MUC13', 'GALNTL6', 'ADAMTSL1', 'MUC16', 'ST6GALNAC3', 'MUC6', 'GALNT17', 'THBS2', 'THSD4', 'ADAMTSL2', 'MUC5AC', 'SPON1']	['THSD7A:-', 'ADAMTS6:-', 'ST6GAL1:-', 'SEMA5A:+', 'MUC5B:-', 'ADAMTS8:+', 'GALNT5:+', 'THBS1:-', 'ADAMTS14:-', 'ADAMTS17:+', 'ADAMTS18:-', 'THSD7B:-', 'GALNT13:+', 'MUC4:-', 'ADAMTS16:-', 'ADAMTS12:-', 'ADAMTS5:-', 'ADAMTS3:-', 'ADAMTSL3:+', 'GALNT14:-', 'ADAMTS9:-', 'GALNT10:-', 'MUC13:-', 'GALNTL6:+', 'ADAMTSL1:-', 'MUC16:-', 'ST6GALNAC3:-', 'MUC6:+', 'GALNT17:-', 'THBS2:-', 'THSD4:-', 'ADAMTS…
38	REACTOME_O_GLYCOSYLATION_OF_TSR_DOMAIN_CONTAINING_PROTEINS	0.466819	5.19549e-08	['THSD7A', 'ADAMTS6', 'SEMA5A', 'ADAMTS8', 'THBS1', 'ADAMTS14', 'ADAMTS17', 'ADAMTS18', 'THSD7B', 'ADAMTS16', 'ADAMTS12', 'ADAMTS5', 'ADAMTS3', 'ADAMTSL3', 'ADAMTS9', 'ADAMTSL1', 'THBS2', 'THSD4', 'ADAMTSL2', 'SPON1']	['THSD7A:-', 'ADAMTS6:-', 'SEMA5A:+', 'ADAMTS8:+', 'THBS1:-', 'ADAMTS14:-', 'ADAMTS17:+', 'ADAMTS18:-', 'THSD7B:-', 'ADAMTS16:-', 'ADAMTS12:-', 'ADAMTS5:-', 'ADAMTS3:-', 'ADAMTSL3:+', 'ADAMTS9:-', 'ADAMTSL1:-', 'THBS2:-', 'THSD4:-', 'ADAMTSL2:-', 'SPON1:-']
39	REACTOME_SIGNALING_BY_MET	0.464128	6.88966e-08	['LAMC3', 'LAMA3', 'LAMC2', 'COL11A1', 'COL5A3', 'LAMB1', 'HPN', 'MET', 'SH3GL2', 'COL1A1', 'FN1', 'COL5A1', 'TNS4', 'SH3GL3', 'LRIG1', 'PTPRJ', 'ITGA2', 'COL1A2', 'COL3A1', 'COL24A1', 'PTPN1', 'LAMA2', 'COL27A1', 'LAMB3', 'COL5A2']	['LAMC3:+', 'LAMA3:+', 'LAMC2:-', 'COL11A1:-', 'COL5A3:-', 'LAMB1:-', 'HPN:+', 'MET:-', 'SH3GL2:+', 'COL1A1:-', 'FN1:-', 'COL5A1:-', 'TNS4:-', 'SH3GL3:+', 'LRIG1:-', 'PTPRJ:+', 'ITGA2:-', 'COL1A2:-', 'COL3A1:-', 'COL24A1:-', 'PTPN1:-', 'LAMA2:-', 'COL27A1:-', 'LAMB3:-', 'COL5A2:-']
40	REACTOME_G_ALPHA_S_SIGNALLING_EVENTS	0.463178	7.62825e-08	['CALCRL', 'ADCY2', 'SCTR', 'PTHLH', 'GRK3', 'VIPR2', 'PDE10A', 'PDE4D', 'PDE1A', 'RAMP3', 'GNGT1', 'ADCY8', 'GPR176', 'PDE7B', 'PDE3A', 'ADCY5', 'GPR39', 'GRK5']	['CALCRL:+', 'ADCY2:-', 'SCTR:-', 'PTHLH:-', 'GRK3:-', 'VIPR2:-', 'PDE10A:-', 'PDE4D:+', 'PDE1A:-', 'RAMP3:+', 'GNGT1:-', 'ADCY8:+', 'GPR176:-', 'PDE7B:-', 'PDE3A:-', 'ADCY5:-', 'GPR39:-', 'GRK5:+']
41	REACTOME_COLLAGEN_DEGRADATION	0.458807	1.19517e-07	['COL23A1', 'COL11A1', 'COL17A1', 'COL5A3', 'COL4A4', 'MMP11', 'MMP9', 'COL1A1', 'COL12A1', 'COL7A1', 'MMP19', 'COL10A1', 'COL5A1', 'COL4A2', 'MMP7', 'COL8A1', 'COL6A3', 'COL1A2', 'MMP10', 'COL3A1', 'COL4A3', 'COL4A1', 'COL14A1', 'COL25A1', 'MMP1', 'COL4A6', 'COL5A2', 'COL15A1', 'COL6A6']	['COL23A1:-', 'COL11A1:-', 'COL17A1:-', 'COL5A3:-', 'COL4A4:+', 'MMP11:-', 'MMP9:-', 'COL1A1:-', 'COL12A1:-', 'COL7A1:-', 'MMP19:-', 'COL10A1:-', 'COL5A1:-', 'COL4A2:-', 'MMP7:-', 'COL8A1:-', 'COL6A3:-', 'COL1A2:-', 'MMP10:-', 'COL3A1:-', 'COL4A3:+', 'COL4A1:-', 'COL14A1:-', 'COL25A1:-', 'MMP1:-', 'COL4A6:-', 'COL5A2:-', 'COL15A1:-', 'COL6A6:+']
42	REACTOME_SENSORY_PROCESSING_OF_SOUND	0.458678	1.21618e-07	['CACNA2D2', 'MYO3B', 'KCNN2', 'EPB41L3', 'EPB41L1', 'EZR', 'RIPOR2', 'CLIC5', 'SNAP25', 'PCDH15', 'EPS8', 'KCNMA1', 'CACNA1D', 'CACNB2', 'PCLO']	['CACNA2D2:+', 'MYO3B:-', 'KCNN2:-', 'EPB41L3:+', 'EPB41L1:-', 'EZR:-', 'RIPOR2:+', 'CLIC5:+', 'SNAP25:-', 'PCDH15:+', 'EPS8:-', 'KCNMA1:-', 'CACNA1D:+', 'CACNB2:+', 'PCLO:+']
43	WP_ADIPOGENESIS	0.456406	1.53501e-07	['EPAS1', 'AHR', 'IGF1', 'PPARGC1A', 'BMP1', 'BMP2', 'EBF1', 'SERPINE1', 'SMAD3', 'CYP26B1', 'LPIN2', 'PTGIS', 'PRLR', 'IL6', 'KLF5', 'PPARG', 'SCD', 'MBNL1', 'SPOCK1', 'LIF', 'LIFR', 'NCOR2']	['EPAS1:+', 'AHR:-', 'IGF1:-', 'PPARGC1A:+', 'BMP1:-', 'BMP2:-', 'EBF1:-', 'SERPINE1:-', 'SMAD3:-', 'CYP26B1:-', 'LPIN2:+', 'PTGIS:-', 'PRLR:+', 'IL6:-', 'KLF5:-', 'PPARG:+', 'SCD:+', 'MBNL1:+', 'SPOCK1:-', 'LIF:-', 'LIFR:+', 'NCOR2:-']
44	REACTOME_ADRENALINE_NORADRENALINE_INHIBITS_INSULIN_SECRETION	0.453045	2.15477e-07	['CACNA2D2', 'GNGT1', 'CACNA1C', 'CACNA1D', 'CACNB2', 'ADCY5']	['CACNA2D2:+', 'GNGT1:-', 'CACNA1C:-', 'CACNA1D:+', 'CACNB2:+', 'ADCY5:-']
45	WP_GENES_CONTROLLING_NEPHROGENESIS	0.45117	2.60436e-07	['ROBO2', 'HNF1B', 'SHH', 'SLIT2', 'KDR', 'CXCL12', 'FGFR2', 'WT1', 'EYA1', 'ITGA8', 'CD36']	['ROBO2:+', 'HNF1B:-', 'SHH:-', 'SLIT2:+', 'KDR:+', 'CXCL12:-', 'FGFR2:-', 'WT1:-', 'EYA1:-', 'ITGA8:+', 'CD36:+']
46	NABA_ECM_GLYCOPROTEINS	0.450358	2.83319e-07	['ABI3BP', 'BMPER', 'CILP', 'COMP', 'CRIM1', 'CRISPLD1', 'CRISPLD2', 'CCN2', 'CCN1', 'DMBT1', 'EDIL3', 'ELN', 'FBLN1', 'FBN1', 'FBN2', 'FGA', 'FGG', 'FN1', 'FNDC1', 'FRAS1', 'GLDN', 'HMCN1', 'HMCN2', 'IGFBP2', 'IGFBP3', 'IGFBP5', 'IGFBP7', 'ANOS1', 'LAMA2', 'LAMA3', 'LAMB1', 'LAMB3', 'LAMC2', 'LAMC3', 'LTBP1', 'LTBP2', 'MATN3', 'MFAP5', 'MFGE8', 'MGP', 'MMRN1', 'NDNF', 'NELL1', 'NELL2', 'CCN3', '…	['ABI3BP:+', 'BMPER:+', 'CILP:-', 'COMP:-', 'CRIM1:+', 'CRISPLD1:-', 'CRISPLD2:-', 'CCN2:-', 'CCN1:-', 'DMBT1:-', 'EDIL3:+', 'ELN:-', 'FBLN1:-', 'FBN1:-', 'FBN2:-', 'FGA:-', 'FGG:+', 'FN1:-', 'FNDC1:-', 'FRAS1:+', 'GLDN:-', 'HMCN1:-', 'HMCN2:-', 'IGFBP2:-', 'IGFBP3:-', 'IGFBP5:-', 'IGFBP7:-', 'ANOS1:+', 'LAMA2:-', 'LAMA3:+', 'LAMB1:-', 'LAMB3:-', 'LAMC2:-', 'LAMC3:+', 'LTBP1:-', 'LTBP2:-', 'MATN3…
47	REACTOME_COLLAGEN_FORMATION	0.450341	2.85091e-07	['TLL1', 'COL23A1', 'LAMA3', 'LAMC2', 'COL11A1', 'COL17A1', 'COL5A3', 'COL4A4', 'P3H2', 'ITGA6', 'MMP9', 'COL1A1', 'COL12A1', 'COL7A1', 'COL10A1', 'COL21A1', 'COL5A1', 'COL4A2', 'CTSV', 'MMP7', 'LOXL4', 'ADAMTS14', 'COL8A1', 'PLOD2', 'ADAMTS3', 'COL6A3', 'COL1A2', 'BMP1', 'COL3A1', 'COL4A3', 'COL22A1', 'COL24A1', 'COL4A1', 'COL14A1', 'COL25A1', 'COL27A1', 'LAMB3', 'COL4A6', 'COL5A2', 'COL15A1', '…	['TLL1:+', 'COL23A1:-', 'LAMA3:+', 'LAMC2:-', 'COL11A1:-', 'COL17A1:-', 'COL5A3:-', 'COL4A4:+', 'P3H2:+', 'ITGA6:-', 'MMP9:-', 'COL1A1:-', 'COL12A1:-', 'COL7A1:-', 'COL10A1:-', 'COL21A1:-', 'COL5A1:-', 'COL4A2:-', 'CTSV:-', 'MMP7:-', 'LOXL4:-', 'ADAMTS14:-', 'COL8A1:-', 'PLOD2:-', 'ADAMTS3:-', 'COL6A3:-', 'COL1A2:-', 'BMP1:-', 'COL3A1:-', 'COL4A3:+', 'COL22A1:-', 'COL24A1:-', 'COL4A1:-', 'COL14A1…
48	REACTOME_ASSEMBLY_OF_COLLAGEN_FIBRILS_AND_OTHER_MULTIMERIC_STRUCTURES	0.444824	4.89437e-07	['TLL1', 'LAMA3', 'LAMC2', 'COL11A1', 'COL17A1', 'COL5A3', 'COL4A4', 'ITGA6', 'MMP9', 'COL1A1', 'COL12A1', 'COL7A1', 'COL10A1', 'COL5A1', 'COL4A2', 'CTSV', 'MMP7', 'LOXL4', 'COL8A1', 'COL6A3', 'COL1A2', 'BMP1', 'COL3A1', 'COL4A3', 'COL24A1', 'COL4A1', 'COL14A1', 'COL27A1', 'LAMB3', 'COL4A6', 'COL5A2', 'COL15A1', 'COL6A6']	['TLL1:+', 'LAMA3:+', 'LAMC2:-', 'COL11A1:-', 'COL17A1:-', 'COL5A3:-', 'COL4A4:+', 'ITGA6:-', 'MMP9:-', 'COL1A1:-', 'COL12A1:-', 'COL7A1:-', 'COL10A1:-', 'COL5A1:-', 'COL4A2:-', 'CTSV:-', 'MMP7:-', 'LOXL4:-', 'COL8A1:-', 'COL6A3:-', 'COL1A2:-', 'BMP1:-', 'COL3A1:-', 'COL4A3:+', 'COL24A1:-', 'COL4A1:-', 'COL14A1:-', 'COL27A1:-', 'LAMB3:-', 'COL4A6:-', 'COL5A2:-', 'COL15A1:-', 'COL6A6:+']
49	REACTOME_EXTRACELLULAR_MATRIX_ORGANIZATION	0.443417	5.62741e-07	['MUSK', 'TLL1', 'VCAN', 'CDH1', 'TNC', 'LTBP1', 'ELN', 'LAMC3', 'COL23A1', 'LAMA3', 'LAMC2', 'COL11A1', 'COL17A1', 'NTN4', 'FBLN1', 'ITGA8', 'COL5A3', 'COL4A4', 'CEACAM6', 'ICAM1', 'P3H2', 'LAMB1', 'ITGA6', 'TGFB2', 'MMP11', 'MMP9', 'TIMP1', 'COMP', 'ITGB8', 'SERPINE1', 'ICAM2', 'COL1A1', 'VWF', 'COL12A1', 'SPARC', 'COL7A1', 'ITGB6', 'FN1', 'TNR', 'SPP1', 'LTBP2', 'MMP19', 'COL10A1', 'SDC4', 'CO…	['MUSK:+', 'TLL1:+', 'VCAN:-', 'CDH1:-', 'TNC:-', 'LTBP1:-', 'ELN:-', 'LAMC3:+', 'COL23A1:-', 'LAMA3:+', 'LAMC2:-', 'COL11A1:-', 'COL17A1:-', 'NTN4:+', 'FBLN1:-', 'ITGA8:+', 'COL5A3:-', 'COL4A4:+', 'CEACAM6:-', 'ICAM1:-', 'P3H2:+', 'LAMB1:-', 'ITGA6:-', 'TGFB2:+', 'MMP11:-', 'MMP9:-', 'TIMP1:-', 'COMP:-', 'ITGB8:-', 'SERPINE1:-', 'ICAM2:-', 'COL1A1:-', 'VWF:+', 'COL12A1:-', 'SPARC:-', 'COL7A1:-',…
50	BIOCARTA_AGR_PATHWAY	0.442565	6.13291e-07	['PAK5', 'NRG3', 'LAMA2', 'NRG2', 'LAMA3', 'NRG1', 'EGFR', 'DMD', 'MUSK', 'PAK3']	['PAK5:+', 'NRG3:+', 'LAMA2:-', 'NRG2:+', 'LAMA3:+', 'NRG1:-', 'EGFR:+', 'DMD:-', 'MUSK:+', 'PAK3:-']
51	REACTOME_DISEASES_OF_GLYCOSYLATION	0.438649	8.9297e-07	['THSD7A', 'VCAN', 'ADAMTS6', 'GPC4', 'PGM1', 'SEMA5A', 'MUC5B', 'SDC4', 'ADAMTS8', 'THBS1', 'ADAMTS14', 'LUM', 'ADAMTS17', 'ADAMTS18', 'THSD7B', 'MUC4', 'ADAMTS16', 'GPC3', 'ADAMTS12', 'ADAMTS5', 'ADAMTS3', 'ADAMTSL3', 'ACAN', 'ADAMTS9', 'MUC13', 'ADAMTSL1', 'GPC5', 'MUC16', 'EXT1', 'BGN', 'GPC6', 'MUC6', 'THBS2', 'THSD4', 'PRELP', 'ADAMTSL2', 'PAPSS2', 'MUC5AC', 'SPON1']	['THSD7A:-', 'VCAN:-', 'ADAMTS6:-', 'GPC4:-', 'PGM1:-', 'SEMA5A:+', 'MUC5B:-', 'SDC4:-', 'ADAMTS8:+', 'THBS1:-', 'ADAMTS14:-', 'LUM:-', 'ADAMTS17:+', 'ADAMTS18:-', 'THSD7B:-', 'MUC4:-', 'ADAMTS16:-', 'GPC3:+', 'ADAMTS12:-', 'ADAMTS5:-', 'ADAMTS3:-', 'ADAMTSL3:+', 'ACAN:+', 'ADAMTS9:-', 'MUC13:-', 'ADAMTSL1:-', 'GPC5:-', 'MUC16:-', 'EXT1:+', 'BGN:-', 'GPC6:-', 'MUC6:+', 'THBS2:-', 'THSD4:-', 'PREL…
52	REACTOME_SIGNALING_BY_RHO_GTPASES_MIRO_GTPASES_AND_RHOBTB3	0.437596	9.90337e-07	['CFTR', 'BAIAP2L1', 'ARHGAP44', 'RHOBTB2', 'ANLN', 'CDH1', 'ARHGAP6', 'MYLK', 'PRKCZ', 'PAK3', 'FAM135A', 'DOCK3', 'PAK5', 'MYH14', 'CAV1', 'RASGRF2', 'ARHGEF26', 'RND3', 'ARHGEF2', 'CENPF', 'FILIP1', 'WIPF3', 'CIT', 'AKAP12', 'MYH10', 'MYH11', 'RRAS2', 'FAM13A', 'DIAPH3', 'DOCK5', 'MPP7', 'KALRN', 'PTPN13', 'DLC1', 'ARHGAP12', 'ARHGAP42', 'PRKCB', 'RHOH', 'PCDH7', 'AKAP13', 'RND1', 'SCAI', 'MUC…	['CFTR:+', 'BAIAP2L1:-', 'ARHGAP44:+', 'RHOBTB2:-', 'ANLN:-', 'CDH1:-', 'ARHGAP6:+', 'MYLK:+', 'PRKCZ:+', 'PAK3:-', 'FAM135A:-', 'DOCK3:-', 'PAK5:+', 'MYH14:-', 'CAV1:-', 'RASGRF2:-', 'ARHGEF26:+', 'RND3:-', 'ARHGEF2:+', 'CENPF:-', 'FILIP1:+', 'WIPF3:-', 'CIT:-', 'AKAP12:+', 'MYH10:+', 'MYH11:-', 'RRAS2:+', 'FAM13A:-', 'DIAPH3:+', 'DOCK5:-', 'MPP7:-', 'KALRN:+', 'PTPN13:-', 'DLC1:+', 'ARHGAP12:+'…
53	REACTOME_ADHERENS_JUNCTIONS_INTERACTIONS	0.436589	1.09323e-06	['CDH1', 'CDH3', 'CDH6', 'CDH11', 'CDH13', 'CDH8', 'CDH12', 'CDH2', 'CADM2', 'CDH4', 'CADM1']	['CDH1:-', 'CDH3:-', 'CDH6:-', 'CDH11:-', 'CDH13:+', 'CDH8:+', 'CDH12:+', 'CDH2:-', 'CADM2:+', 'CDH4:+', 'CADM1:+']
54	REACTOME_DEATH_RECEPTOR_SIGNALLING	0.428147	2.38704e-06	['BIRC3', 'RASGRF2', 'ARHGEF26', 'ARHGEF2', 'NGF', 'KALRN', 'SQSTM1', 'AKAP13', 'ARHGEF38']	['BIRC3:-', 'RASGRF2:-', 'ARHGEF26:+', 'ARHGEF2:+', 'NGF:+', 'KALRN:+', 'SQSTM1:+', 'AKAP13:+', 'ARHGEF38:+']
55	PID_SMAD2_3NUCLEAR_PATHWAY	0.423478	3.6461e-06	['HNF4A', 'RUNX1', 'SMAD3', 'SERPINE1', 'RUNX2', 'COL1A2']	['HNF4A:-', 'RUNX1:-', 'SMAD3:-', 'SERPINE1:-', 'RUNX2:-', 'COL1A2:-']
56	REACTOME_MUSCLE_CONTRACTION	0.422226	4.09387e-06	['CACNA2D2', 'CAMK2B', 'ATP2B4', 'MYLK', 'ABCC9', 'CACNG4', 'TBX5', 'NOS1', 'SORBS1', 'ITPR3', 'FGF14', 'ACTA2', 'FGF12', 'FGF13', 'CACNG6', 'TNNT3', 'TNNI2', 'MYH11', 'ANXA1', 'KCNK1', 'SCN2A', 'SCN7A', 'TPM1', 'ATP1B1', 'SCN1A', 'CORIN', 'CACNA1C', 'KCNE4', 'GUCY1A2', 'SCN3A', 'TTN', 'ACTG2', 'LMOD1', 'CACNB2', 'KCNK3', 'DES', 'KCNE1', 'KCNIP1', 'ANXA2', 'SLC8A1', 'KCND2', 'KCNIP4', 'ASPH', 'RY…	['CACNA2D2:+', 'CAMK2B:-', 'ATP2B4:-', 'MYLK:+', 'ABCC9:-', 'CACNG4:-', 'TBX5:+', 'NOS1:+', 'SORBS1:+', 'ITPR3:+', 'FGF14:-', 'ACTA2:-', 'FGF12:+', 'FGF13:-', 'CACNG6:-', 'TNNT3:-', 'TNNI2:-', 'MYH11:-', 'ANXA1:-', 'KCNK1:-', 'SCN2A:-', 'SCN7A:+', 'TPM1:-', 'ATP1B1:-', 'SCN1A:+', 'CORIN:-', 'CACNA1C:-', 'KCNE4:-', 'GUCY1A2:+', 'SCN3A:-', 'TTN:+', 'ACTG2:-', 'LMOD1:-', 'CACNB2:+', 'KCNK3:+', 'DES:…
57	REACTOME_EGR2_AND_SOX10_MEDIATED_INITIATION_OF_SCHWANN_CELL_MYELINATION	0.421705	4.30756e-06	['LAMB1', 'ADGRG6', 'YAP1', 'SCD5', 'ADGRV1', 'LAMA2']	['LAMB1:-', 'ADGRG6:+', 'YAP1:+', 'SCD5:-', 'ADGRV1:+', 'LAMA2:-']
58	REACTOME_CARDIAC_CONDUCTION	0.421138	4.5502e-06	['CACNA2D2', 'CAMK2B', 'ATP2B4', 'ABCC9', 'CACNG4', 'TBX5', 'NOS1', 'ITPR3', 'FGF14', 'FGF12', 'FGF13', 'CACNG6', 'KCNK1', 'SCN2A', 'SCN7A', 'ATP1B1', 'SCN1A', 'CORIN', 'CACNA1C', 'KCNE4', 'SCN3A', 'CACNB2', 'KCNK3', 'KCNE1', 'KCNIP1', 'SLC8A1', 'KCND2', 'KCNIP4', 'ASPH', 'RYR2', 'RYR3']	['CACNA2D2:+', 'CAMK2B:-', 'ATP2B4:-', 'ABCC9:-', 'CACNG4:-', 'TBX5:+', 'NOS1:+', 'ITPR3:+', 'FGF14:-', 'FGF12:+', 'FGF13:-', 'CACNG6:-', 'KCNK1:-', 'SCN2A:-', 'SCN7A:+', 'ATP1B1:-', 'SCN1A:+', 'CORIN:-', 'CACNA1C:-', 'KCNE4:-', 'SCN3A:-', 'CACNB2:+', 'KCNK3:+', 'KCNE1:-', 'KCNIP1:+', 'SLC8A1:+', 'KCND2:-', 'KCNIP4:+', 'ASPH:-', 'RYR2:-', 'RYR3:-']
59	PID_INTEGRIN4_PATHWAY	0.420847	4.69083e-06	['LAMB1', 'LAMB3', 'ITGA6', 'LAMC2', 'LAMA2', 'LAMA3']	['LAMB1:-', 'LAMB3:-', 'ITGA6:-', 'LAMC2:-', 'LAMA2:-', 'LAMA3:+']
60	WP_ALPHA_6_BETA_4_SIGNALING_PATHWAY	0.420847	4.7136e-06	['LAMB3', 'LAMC2', 'ITGA6', 'LAMB1', 'LAMA2', 'LAMA3']	['LAMB3:-', 'LAMC2:-', 'ITGA6:-', 'LAMB1:-', 'LAMA2:-', 'LAMA3:+']
61	REACTOME_DEGRADATION_OF_THE_EXTRACELLULAR_MATRIX	0.419101	5.52068e-06	['TLL1', 'CDH1', 'ELN', 'COL23A1', 'LAMA3', 'LAMC2', 'COL11A1', 'COL17A1', 'COL5A3', 'COL4A4', 'LAMB1', 'MMP11', 'MMP9', 'TIMP1', 'COL1A1', 'COL12A1', 'COL7A1', 'FN1', 'SPP1', 'MMP19', 'COL10A1', 'COL5A1', 'COL4A2', 'ADAMTS8', 'CAPN9', 'CTSV', 'MMP7', 'FBN2', 'ADAMTS18', 'COL8A1', 'ADAMTS16', 'ADAMTS5', 'MMP16', 'ACAN', 'CAPN13', 'COL6A3', 'ADAMTS9', 'COL1A2', 'FBN1', 'MMP10', 'BMP1', 'COL3A1', '…	['TLL1:+', 'CDH1:-', 'ELN:-', 'COL23A1:-', 'LAMA3:+', 'LAMC2:-', 'COL11A1:-', 'COL17A1:-', 'COL5A3:-', 'COL4A4:+', 'LAMB1:-', 'MMP11:-', 'MMP9:-', 'TIMP1:-', 'COL1A1:-', 'COL12A1:-', 'COL7A1:-', 'FN1:-', 'SPP1:-', 'MMP19:-', 'COL10A1:-', 'COL5A1:-', 'COL4A2:-', 'ADAMTS8:+', 'CAPN9:+', 'CTSV:-', 'MMP7:-', 'FBN2:-', 'ADAMTS18:-', 'COL8A1:-', 'ADAMTS16:-', 'ADAMTS5:-', 'MMP16:-', 'ACAN:+', 'CAPN13:-…
62	REACTOME_P75_NTR_RECEPTOR_MEDIATED_SIGNALLING,REACTOME_CELL_DEATH_SIGNALLING_VIA_NRAGE_NRIF_AND_NADE	0.418014	6.09969e-06	['RASGRF2', 'ARHGEF26', 'ARHGEF2', 'NGF', 'KALRN', 'SQSTM1', 'AKAP13', 'ARHGEF38']	['RASGRF2:-', 'ARHGEF26:+', 'ARHGEF2:+', 'NGF:+', 'KALRN:+', 'SQSTM1:+', 'AKAP13:+', 'ARHGEF38:+']
63	WP_ANGIOTENSIN_II_RECEPTOR_TYPE_1_PATHWAY	0.415527	7.60396e-06	['NOX4', 'COL1A2', 'COL1A1', 'ACTA2', 'SMAD3', 'ACE2', 'CCN2', 'PDGFD']	['NOX4:-', 'COL1A2:-', 'COL1A1:-', 'ACTA2:-', 'SMAD3:-', 'ACE2:-', 'CCN2:-', 'PDGFD:-']
64	KEGG_NEUROACTIVE_LIGAND_RECEPTOR_INTERACTION	0.414361	8.44849e-06	['PTGFR', 'PTGER3', 'CALCRL', 'TACR1', 'NMUR2', 'PRLR', 'NPFFR2', 'APLNR', 'AGTR2', 'GRIK2', 'GRID1', 'GRIA1', 'GABRG3', 'GABRB2', 'HTR1F', 'ADRA1A', 'LPAR3', 'HRH1', 'LPAR1', 'EDNRB', 'CHRM2', 'CHRM3', 'GABBR2', 'VIPR2', 'GPR156', 'GRM5', 'GRM8', 'GRM7', 'F2RL3', 'GRIN2A', 'GRIN2B', 'GRIK4', 'SCTR', 'P2RY14']	['PTGFR:-', 'PTGER3:-', 'CALCRL:+', 'TACR1:-', 'NMUR2:+', 'PRLR:+', 'NPFFR2:+', 'APLNR:-', 'AGTR2:-', 'GRIK2:-', 'GRID1:-', 'GRIA1:+', 'GABRG3:-', 'GABRB2:-', 'HTR1F:-', 'ADRA1A:+', 'LPAR3:-', 'HRH1:-', 'LPAR1:+', 'EDNRB:+', 'CHRM2:+', 'CHRM3:+', 'GABBR2:-', 'VIPR2:-', 'GPR156:-', 'GRM5:-', 'GRM8:+', 'GRM7:-', 'F2RL3:-', 'GRIN2A:-', 'GRIN2B:+', 'GRIK4:+', 'SCTR:-', 'P2RY14:-']
65	WP_NRP1TRIGGERED_SIGNALING_PATHWAYS_IN_PANCREATIC_CANCER	0.413335	9.27024e-06	['SEMA3A', 'TGFB2', 'MET', 'EGF', 'COL1A2', 'COL1A1', 'FLT1', 'EGFR', 'PLXNA4', 'CCNE2', 'SMAD3', 'KDR', 'CCN2', 'MMP9']	['SEMA3A:-', 'TGFB2:+', 'MET:-', 'EGF:-', 'COL1A2:-', 'COL1A1:-', 'FLT1:+', 'EGFR:+', 'PLXNA4:-', 'CCNE2:-', 'SMAD3:-', 'KDR:+', 'CCN2:-', 'MMP9:-']
66	REACTOME_SIGNALING_BY_INTERLEUKINS	0.412457	1.0042e-05	['CRLF1', 'IL20RA', 'PTGS2', 'CXCL2', 'ICAM1', 'HMOX1', 'MMP9', 'TIMP1', 'CCL22', 'PTPRZ1', 'CSF3', 'CCL2', 'MAPK10', 'SOD2', 'LIFR', 'CCL20', 'FN1', 'IL1R2', 'IL1R1', 'CSF3R', 'IL13RA2', 'LIF', 'SNAP25', 'IL2RA', 'ANXA1', 'CD36', 'IL6', 'IL1RN', 'IRF4', 'FGF2', 'DUSP6', 'LCN2', 'IL18', 'IL34', 'SQSTM1', 'ALOX15', 'VCAM1', 'PTPN13', 'CXCL1', 'CSF2', 'COL1A2', 'SMAD3', 'CXCL10', 'IL1RAPL1', 'CXCL8…	['CRLF1:-', 'IL20RA:+', 'PTGS2:-', 'CXCL2:-', 'ICAM1:-', 'HMOX1:+', 'MMP9:-', 'TIMP1:-', 'CCL22:-', 'PTPRZ1:-', 'CSF3:+', 'CCL2:-', 'MAPK10:-', 'SOD2:+', 'LIFR:+', 'CCL20:-', 'FN1:-', 'IL1R2:+', 'IL1R1:-', 'CSF3R:+', 'IL13RA2:-', 'LIF:-', 'SNAP25:-', 'IL2RA:-', 'ANXA1:-', 'CD36:+', 'IL6:-', 'IL1RN:-', 'IRF4:-', 'FGF2:-', 'DUSP6:+', 'LCN2:-', 'IL18:-', 'IL34:-', 'SQSTM1:+', 'ALOX15:-', 'VCAM1:-', …
67	REACTOME_DISEASES_OF_SIGNAL_TRANSDUCTION_BY_GROWTH_FACTOR_RECEPTORS_AND_SECOND_MESSENGERS	0.40858	1.4007e-05	['MAMLD1', 'HDAC9', 'CAMK2B', 'FGFR2', 'FGF10', 'NOX4', 'MET', 'KANK1', 'AREG', 'VWF', 'DUSP16', 'FGF1', 'FN1', 'BCL11A', 'EREG', 'KDR', 'KLB', 'MDM2', 'LMO7', 'FGF2', 'EGF', 'DUSP6', 'ESR2', 'FGF7', 'KSR1', 'DUSP10', 'EGFR', 'CNKSR2', 'DKK2', 'NRG1', 'KIT', 'NRG2', 'SQSTM1', 'SHH', 'SMAD3', 'RBPJ', 'NRG4', 'BCL2L1', 'FGG', 'FGA', 'BTC', 'ERBB4', 'EPGN', 'NRG3', 'NCOR2', 'SPRED2', 'LYN']	['MAMLD1:-', 'HDAC9:+', 'CAMK2B:-', 'FGFR2:-', 'FGF10:+', 'NOX4:-', 'MET:-', 'KANK1:+', 'AREG:-', 'VWF:+', 'DUSP16:-', 'FGF1:-', 'FN1:-', 'BCL11A:-', 'EREG:-', 'KDR:+', 'KLB:+', 'MDM2:-', 'LMO7:+', 'FGF2:-', 'EGF:-', 'DUSP6:+', 'ESR2:-', 'FGF7:-', 'KSR1:-', 'DUSP10:-', 'EGFR:+', 'CNKSR2:-', 'DKK2:-', 'NRG1:-', 'KIT:-', 'NRG2:+', 'SQSTM1:+', 'SHH:-', 'SMAD3:-', 'RBPJ:-', 'NRG4:-', 'BCL2L1:-', 'FGG…
68	REACTOME_ECM_PROTEOGLYCANS	0.40856	1.41004e-05	['MUSK', 'VCAN', 'TNC', 'LAMA3', 'ITGA8', 'COL5A3', 'COL4A4', 'LAMB1', 'TGFB2', 'COMP', 'SERPINE1', 'COL1A1', 'SPARC', 'ITGB6', 'FN1', 'TNR', 'COL5A1', 'MATN3', 'COL4A2', 'LUM', 'ITGA9', 'HAPLN1', 'NCAM1', 'ACAN', 'COL6A3', 'ITGA2', 'COL1A2', 'COL3A1', 'COL4A3', 'BGN', 'COL4A1', 'LAMA2', 'COL4A6', 'COL5A2', 'COL6A6']	['MUSK:+', 'VCAN:-', 'TNC:-', 'LAMA3:+', 'ITGA8:+', 'COL5A3:-', 'COL4A4:+', 'LAMB1:-', 'TGFB2:+', 'COMP:-', 'SERPINE1:-', 'COL1A1:-', 'SPARC:-', 'ITGB6:-', 'FN1:-', 'TNR:+', 'COL5A1:-', 'MATN3:-', 'COL4A2:-', 'LUM:-', 'ITGA9:-', 'HAPLN1:+', 'NCAM1:-', 'ACAN:+', 'COL6A3:-', 'ITGA2:-', 'COL1A2:-', 'COL3A1:-', 'COL4A3:+', 'BGN:-', 'COL4A1:-', 'LAMA2:-', 'COL4A6:-', 'COL5A2:-', 'COL6A6:+']
69	PID_A6B1_A6B4_INTEGRIN_PATHWAY	0.408142	1.46782e-05	['CDH1', 'MET', 'LAMA2', 'LAMB1', 'LAMB3', 'CD9', 'LAMA3', 'COL17A1', 'EGFR', 'LAMC2', 'EGF', 'ITGA6', 'SFN', 'LAMC3']	['CDH1:-', 'MET:-', 'LAMA2:-', 'LAMB1:-', 'LAMB3:-', 'CD9:-', 'LAMA3:+', 'COL17A1:-', 'EGFR:+', 'LAMC2:-', 'EGF:-', 'ITGA6:-', 'SFN:-', 'LAMC3:+']
70	REACTOME_CELL_JUNCTION_ORGANIZATION	0.407919	1.5031e-05	['CDH1', 'LAMA3', 'LAMC2', 'CDH3', 'COL17A1', 'CLDN18', 'ITGA6', 'CDH6', 'CLDN16', 'PATJ', 'CDH11', 'CDH13', 'SDK1', 'CDH8', 'CDH12', 'CLDN1', 'CDH2', 'CADM2', 'CDH4', 'CADM1', 'CLDN5', 'KRT5', 'KRT14', 'LAMB3']	['CDH1:-', 'LAMA3:+', 'LAMC2:-', 'CDH3:-', 'COL17A1:-', 'CLDN18:+', 'ITGA6:-', 'CDH6:-', 'CLDN16:-', 'PATJ:+', 'CDH11:-', 'CDH13:+', 'SDK1:+', 'CDH8:+', 'CDH12:+', 'CLDN1:-', 'CDH2:-', 'CADM2:+', 'CDH4:+', 'CADM1:+', 'CLDN5:-', 'KRT5:-', 'KRT14:-', 'LAMB3:-']
71	BIOCARTA_PDZS_PATHWAY	0.406685	1.67458e-05	['PCLO', 'NFASC', 'DLG2', 'NRXN3', 'NCAM1']	['PCLO:+', 'NFASC:+', 'DLG2:-', 'NRXN3:+', 'NCAM1:-']
72	REACTOME_RAC3_GTPASE_CYCLE	0.406112	1.76544e-05	['BAIAP2L1', 'ARHGAP6', 'CAV1', 'DIAPH3', 'MPP7', 'ARHGAP42', 'NHS']	['BAIAP2L1:-', 'ARHGAP6:+', 'CAV1:-', 'DIAPH3:+', 'MPP7:-', 'ARHGAP42:-', 'NHS:-']
73	KEGG_TIGHT_JUNCTION	0.405901	1.80587e-05	['PATJ', 'EPB41L3', 'MYH14', 'RRAS2', 'CLDN18', 'LLGL2', 'MAGI3', 'CLDN16', 'MYH11', 'MYH10', 'PRKCB', 'CLDN5', 'CLDN1', 'PRKCQ', 'PRKCZ', 'PPP2R2B', 'RAB3B', 'CTNNA3', 'EPB41L1']	['PATJ:+', 'EPB41L3:+', 'MYH14:-', 'RRAS2:+', 'CLDN18:+', 'LLGL2:+', 'MAGI3:+', 'CLDN16:-', 'MYH11:-', 'MYH10:+', 'PRKCB:-', 'CLDN5:-', 'CLDN1:-', 'PRKCQ:-', 'PRKCZ:+', 'PPP2R2B:-', 'RAB3B:-', 'CTNNA3:-', 'EPB41L1:-']
74	REACTOME_ION_CHANNEL_TRANSPORT	0.401303	2.6493e-05	['CLCA4', 'ANO2', 'NEDD4L', 'CAMK2B', 'ATP2B4', 'ATP2C2', 'ATP11A', 'ATP12A', 'TRPM3', 'NALCN', 'ATP10B', 'ATP8A1', 'ATP13A4', 'ANO1', 'ATP8A2', 'TRPC4', 'STOML3', 'UNC79', 'ANO3', 'TRPC6', 'CLCA2', 'BEST4', 'ATP1B1', 'ATP6V0D2', 'ANO4', 'SLC9C2', 'WNK2', 'SCNN1G', 'SCNN1B', 'ASPH', 'RYR2', 'RYR3', 'ATP10A']	['CLCA4:-', 'ANO2:+', 'NEDD4L:+', 'CAMK2B:-', 'ATP2B4:-', 'ATP2C2:+', 'ATP11A:+', 'ATP12A:-', 'TRPM3:-', 'NALCN:-', 'ATP10B:-', 'ATP8A1:+', 'ATP13A4:+', 'ANO1:+', 'ATP8A2:-', 'TRPC4:-', 'STOML3:-', 'UNC79:-', 'ANO3:-', 'TRPC6:+', 'CLCA2:-', 'BEST4:-', 'ATP1B1:-', 'ATP6V0D2:-', 'ANO4:-', 'SLC9C2:-', 'WNK2:-', 'SCNN1G:-', 'SCNN1B:-', 'ASPH:-', 'RYR2:-', 'RYR3:-', 'ATP10A:-']
75	WP_GPCRS_CLASS_A_RHODOPSINLIKE	0.400258	2.89913e-05	['EDNRB', 'CHRM3', 'CHRM2', 'ADRA1A', 'NPFFR2', 'PTGER3', 'PTGFR', 'AGTR2', 'APLNR', 'NMUR2', 'HTR1F', 'F2RL3', 'HRH1', 'GPR39', 'P2RY14']	['EDNRB:+', 'CHRM3:+', 'CHRM2:+', 'ADRA1A:+', 'NPFFR2:+', 'PTGER3:-', 'PTGFR:-', 'AGTR2:-', 'APLNR:-', 'NMUR2:+', 'HTR1F:-', 'F2RL3:-', 'HRH1:-', 'GPR39:-', 'P2RY14:-']
76	KEGG_LONG_TERM_POTENTIATION	0.399934	2.99181e-05	['GRM5', 'ADCY8', 'PLCB1', 'PRKCB', 'GRIN2A', 'GRIN2B', 'ITPR3', 'CACNA1C', 'GRIA1', 'CAMK2B']	['GRM5:-', 'ADCY8:+', 'PLCB1:-', 'PRKCB:-', 'GRIN2A:-', 'GRIN2B:+', 'ITPR3:+', 'CACNA1C:-', 'GRIA1:+', 'CAMK2B:-']
77	KEGG_PATHWAYS_IN_CANCER	0.39625	4.04381e-05	['FN1', 'BIRC3', 'IGF1', 'HHIP', 'LEF1', 'PTGS2', 'LAMC2', 'LAMB3', 'LAMB1', 'SHH', 'TGFB2', 'MET', 'CSF3R', 'LAMC3', 'FGF7', 'FGF1', 'PTCH2', 'FGF2', 'MAPK10', 'MECOM', 'FGFR2', 'KIT', 'FGF14', 'FGF10', 'FGF12', 'FGF13', 'SMAD3', 'RUNX1', 'RUNX1T1', 'CCNA1', 'TCF7L1', 'CTNNA3', 'COL4A6', 'COL4A1', 'MMP1', 'COL4A2', 'MMP9', 'COL4A4', 'MDM2', 'ARNT2', 'EGLN3', 'DAPK1', 'VEGFC', 'BCL2L1', 'DCC', 'C…	['FN1:-', 'BIRC3:-', 'IGF1:-', 'HHIP:+', 'LEF1:-', 'PTGS2:-', 'LAMC2:-', 'LAMB3:-', 'LAMB1:-', 'SHH:-', 'TGFB2:+', 'MET:-', 'CSF3R:+', 'LAMC3:+', 'FGF7:-', 'FGF1:-', 'PTCH2:-', 'FGF2:-', 'MAPK10:-', 'MECOM:-', 'FGFR2:-', 'KIT:-', 'FGF14:-', 'FGF10:+', 'FGF12:+', 'FGF13:-', 'SMAD3:-', 'RUNX1:-', 'RUNX1T1:+', 'CCNA1:-', 'TCF7L1:-', 'CTNNA3:-', 'COL4A6:-', 'COL4A1:-', 'MMP1:-', 'COL4A2:-', 'MMP9:-',…
78	REACTOME_RHOC_GTPASE_CYCLE	0.394347	4.72855e-05	['ANLN', 'CAV1', 'CIT', 'DIAPH3', 'DLC1', 'AKAP13', 'CCDC187']	['ANLN:-', 'CAV1:-', 'CIT:-', 'DIAPH3:+', 'DLC1:+', 'AKAP13:+', 'CCDC187:-']
79	BIOCARTA_AKAP13_PATHWAY	0.392979	5.29579e-05	['LPAR1', 'AKAP13', 'LPAR3']	['LPAR1:+', 'AKAP13:+', 'LPAR3:-']
80	WP_COMPLEMENT_SYSTEM	0.392424	5.56141e-05	['SFTPA1', 'FGG', 'LAMB1', 'THBS1', 'SELE', 'SFTPA2', 'ICAM2', 'ICAM1', 'ITGA2', 'PLAUR', 'CR2', 'C3', 'FGA', 'C4BPA', 'C5', 'C6', 'SPP1', 'LRP2', 'C7', 'C9', 'PTX3', 'CD55']	['SFTPA1:+', 'FGG:+', 'LAMB1:-', 'THBS1:-', 'SELE:-', 'SFTPA2:+', 'ICAM2:-', 'ICAM1:-', 'ITGA2:-', 'PLAUR:-', 'CR2:-', 'C3:-', 'FGA:-', 'C4BPA:+', 'C5:+', 'C6:-', 'SPP1:-', 'LRP2:+', 'C7:+', 'C9:+', 'PTX3:-', 'CD55:+']
81	REACTOME_PHASE_0_RAPID_DEPOLARISATION	0.389304	7.13012e-05	['CACNA2D2', 'CAMK2B', 'CACNG4', 'FGF14', 'FGF12', 'FGF13', 'CACNG6', 'SCN2A', 'SCN7A', 'SCN1A', 'CACNA1C', 'SCN3A', 'CACNB2']	['CACNA2D2:+', 'CAMK2B:-', 'CACNG4:-', 'FGF14:-', 'FGF12:+', 'FGF13:-', 'CACNG6:-', 'SCN2A:-', 'SCN7A:+', 'SCN1A:+', 'CACNA1C:-', 'SCN3A:-', 'CACNB2:+']
82	PID_FRA_PATHWAY	0.38886	7.41943e-05	['MMP9', 'MGP', 'PLAUR', 'LAMA3', 'HMOX1', 'NFATC2', 'COL1A2', 'PLAU', 'LIF', 'CCL2', 'CXCL8', 'THBD', 'IL6', 'MMP1']	['MMP9:-', 'MGP:-', 'PLAUR:-', 'LAMA3:+', 'HMOX1:+', 'NFATC2:-', 'COL1A2:-', 'PLAU:-', 'LIF:-', 'CCL2:-', 'CXCL8:-', 'THBD:+', 'IL6:-', 'MMP1:-']
83	PID_AP1_PATHWAY	0.388495	7.67311e-05	['COL1A2', 'CCL2', 'PLAU', 'MMP9', 'IL6', 'TIMP1', 'CCN1', 'FABP4', 'EDN1', 'CSF2', 'MMP1', 'FOSB', 'CXCL8', 'NFATC2']	['COL1A2:-', 'CCL2:-', 'PLAU:-', 'MMP9:-', 'IL6:-', 'TIMP1:-', 'CCN1:-', 'FABP4:-', 'EDN1:-', 'CSF2:+', 'MMP1:-', 'FOSB:-', 'CXCL8:-', 'NFATC2:-']
84	REACTOME_CELL_CELL_JUNCTION_ORGANIZATION	0.387807	8.13521e-05	['CDH1', 'CDH3', 'CLDN18', 'CDH6', 'CLDN16', 'PATJ', 'CDH11', 'CDH13', 'SDK1', 'CDH8', 'CDH12', 'CLDN1', 'CDH2', 'CADM2', 'CDH4', 'CADM1', 'CLDN5']	['CDH1:-', 'CDH3:-', 'CLDN18:+', 'CDH6:-', 'CLDN16:-', 'PATJ:+', 'CDH11:-', 'CDH13:+', 'SDK1:+', 'CDH8:+', 'CDH12:+', 'CLDN1:-', 'CDH2:-', 'CADM2:+', 'CDH4:+', 'CADM1:+', 'CLDN5:-']
85	KEGG_PURINE_METABOLISM	0.381196	0.000135015	['ENPP3', 'ENPP1', 'XDH', 'PDE4D', 'NME5', 'PDE7B', 'GUCY1A2', 'FHIT', 'ADCY2', 'PDE3A', 'PDE1C', 'GDA', 'ADCY8', 'AK7', 'ADCY5', 'PDE1A', 'PAPSS2', 'ADK', 'RRM2', 'PDE10A', 'ENTPD1']	['ENPP3:-', 'ENPP1:-', 'XDH:-', 'PDE4D:+', 'NME5:-', 'PDE7B:-', 'GUCY1A2:+', 'FHIT:-', 'ADCY2:-', 'PDE3A:-', 'PDE1C:+', 'GDA:-', 'ADCY8:+', 'AK7:-', 'ADCY5:-', 'PDE1A:-', 'PAPSS2:+', 'ADK:+', 'RRM2:+', 'PDE10A:-', 'ENTPD1:-']
86	REACTOME_LAMININ_INTERACTIONS	0.380551	0.000142453	['LAMC3', 'LAMA3', 'LAMC2', 'COL4A4', 'LAMB1', 'ITGA6', 'COL7A1', 'COL4A2', 'ITGA2', 'COL4A3', 'COL4A1', 'LAMA2', 'LAMB3', 'COL4A6', 'ITGA1']	['LAMC3:+', 'LAMA3:+', 'LAMC2:-', 'COL4A4:+', 'LAMB1:-', 'ITGA6:-', 'COL7A1:-', 'COL4A2:-', 'ITGA2:-', 'COL4A3:+', 'COL4A1:-', 'LAMA2:-', 'LAMB3:-', 'COL4A6:-', 'ITGA1:+']
87	REACTOME_NRAGE_SIGNALS_DEATH_THROUGH_JNK	0.380284	0.000146126	['RASGRF2', 'ARHGEF26', 'ARHGEF2', 'NGF', 'KALRN', 'AKAP13', 'ARHGEF38']	['RASGRF2:-', 'ARHGEF26:+', 'ARHGEF2:+', 'NGF:+', 'KALRN:+', 'AKAP13:+', 'ARHGEF38:+']
88	WP_IL18_SIGNALING_PATHWAY	0.379296	0.000158132	['CCL4', 'BCL2L1', 'SPON1', 'CCL2', 'CCL20', 'CCL19', 'TNFRSF11B', 'CLDN1', 'SDC4', 'FN1', 'CD36', 'IL2RA', 'GRIN2B', 'ACTA2', 'IL6', 'CD83', 'PTGS2', 'GRM7', 'COL3A1', 'CXCL3', 'CXCL2', 'COL1A2', 'CXCL8', 'COL1A1', 'RUNX2', 'MMP1', 'MMP9', 'TNIP3', 'TACR1', 'SNTB1', 'ICAM1', 'BMP2', 'TIMP1', 'TIMP3', 'CCN4', 'EPS8', 'HMOX1', 'PRKCB', 'SEMA6D', 'IL18', 'SPP1', 'BIRC3', 'DES', 'SYT10', 'ADAMTS5', …	['CCL4:-', 'BCL2L1:-', 'SPON1:-', 'CCL2:-', 'CCL20:-', 'CCL19:-', 'TNFRSF11B:-', 'CLDN1:-', 'SDC4:-', 'FN1:-', 'CD36:+', 'IL2RA:-', 'GRIN2B:+', 'ACTA2:-', 'IL6:-', 'CD83:+', 'PTGS2:-', 'GRM7:-', 'COL3A1:-', 'CXCL3:-', 'CXCL2:-', 'COL1A2:-', 'CXCL8:-', 'COL1A1:-', 'RUNX2:-', 'MMP1:-', 'MMP9:-', 'TNIP3:-', 'TACR1:-', 'SNTB1:-', 'ICAM1:-', 'BMP2:-', 'TIMP1:-', 'TIMP3:+', 'CCN4:-', 'EPS8:-', 'HMOX1:+…
89	WP_MAPK_SIGNALING_PATHWAY	0.377618	0.000179977	['CACNG4', 'MAPK10', 'CACNG6', 'RASGRP3', 'IL1R1', 'LRRK2', 'FGF7', 'EGF', 'FGF2', 'FGF1', 'EGFR', 'FGFR2', 'FGF14', 'FGF13', 'FGF12', 'FGF10', 'BDNF', 'DUSP6', 'TGFB2', 'DUSP10', 'RRAS2', 'IL1R2', 'PLA2G4F', 'CACNA1A', 'CACNA1B', 'CACNA1C', 'CACNA1D', 'CACNA1E', 'CACNA2D2', 'NTRK2', 'CACNB2', 'CACNB4', 'RASGRP1', 'NGF', 'DUSP16', 'MAP3K13', 'CACNA2D3', 'RASGRF1', 'RASGRF2']	['CACNG4:-', 'MAPK10:-', 'CACNG6:-', 'RASGRP3:+', 'IL1R1:-', 'LRRK2:-', 'FGF7:-', 'EGF:-', 'FGF2:-', 'FGF1:-', 'EGFR:+', 'FGFR2:-', 'FGF14:-', 'FGF13:-', 'FGF12:+', 'FGF10:+', 'BDNF:+', 'DUSP6:+', 'TGFB2:+', 'DUSP10:-', 'RRAS2:+', 'IL1R2:+', 'PLA2G4F:+', 'CACNA1A:-', 'CACNA1B:-', 'CACNA1C:-', 'CACNA1D:+', 'CACNA1E:-', 'CACNA2D2:+', 'NTRK2:+', 'CACNB2:+', 'CACNB4:+', 'RASGRP1:-', 'NGF:+', 'DUSP16:…
90	KEGG_VASCULAR_SMOOTH_MUSCLE_CONTRACTION	0.377468	0.000183006	['CALCRL', 'IRAG1', 'ITPR3', 'GUCY1A2', 'MYLK', 'ADCY2', 'MYH11', 'ADCY8', 'PLCB1', 'PRKCB', 'ADCY5', 'KCNMA1', 'PLA2G2A', 'CACNA1D', 'PRKCQ', 'PLA2G5', 'CACNA1C', 'ACTG2', 'PRKG1', 'RAMP3', 'ACTA2', 'ADRA1A', 'KCNMB4']	['CALCRL:+', 'IRAG1:-', 'ITPR3:+', 'GUCY1A2:+', 'MYLK:+', 'ADCY2:-', 'MYH11:-', 'ADCY8:+', 'PLCB1:-', 'PRKCB:-', 'ADCY5:-', 'KCNMA1:-', 'PLA2G2A:-', 'CACNA1D:+', 'PRKCQ:-', 'PLA2G5:-', 'CACNA1C:-', 'ACTG2:-', 'PRKG1:+', 'RAMP3:+', 'ACTA2:-', 'ADRA1A:+', 'KCNMB4:+']
91	REACTOME_ADAPTIVE_IMMUNE_SYSTEM	0.37723	0.000187299	['KLHL13', 'ASB4', 'CDH1', 'NEDD4L', 'COL17A1', 'PRKCQ', 'PAG1', 'PAK3', 'ICAM1', 'ITPR3', 'NFATC2', 'CTSH', 'SH3GL2', 'ICAM2', 'COL1A1', 'BTNL8', 'C3', 'RAP1GAP2', 'SFTPD', 'CD36', 'LMO7', 'BLK', 'CTSV', 'HECW2', 'FBXO15', 'PTPRJ', 'RASGRP3', 'FBXO32', 'XDH', 'COLEC12', 'FBXL13', 'VCAM1', 'COL1A2', 'PRKCB', 'COL3A1', 'FGG', 'FGA', 'SPSB1', 'RASGRP1', 'PRKG1', 'UBE2H', 'TUBB4B', 'CTSE', 'SMURF1',…	['KLHL13:-', 'ASB4:+', 'CDH1:-', 'NEDD4L:+', 'COL17A1:-', 'PRKCQ:-', 'PAG1:+', 'PAK3:-', 'ICAM1:-', 'ITPR3:+', 'NFATC2:-', 'CTSH:+', 'SH3GL2:+', 'ICAM2:-', 'COL1A1:-', 'BTNL8:+', 'C3:-', 'RAP1GAP2:+', 'SFTPD:+', 'CD36:+', 'LMO7:+', 'BLK:-', 'CTSV:-', 'HECW2:+', 'FBXO15:-', 'PTPRJ:+', 'RASGRP3:+', 'FBXO32:-', 'XDH:-', 'COLEC12:+', 'FBXL13:-', 'VCAM1:-', 'COL1A2:-', 'PRKCB:-', 'COL3A1:-', 'FGG:+', …
92	WP_ENDOCHONDRAL_OSSIFICATION_WITH_SKELETAL_DYSPLASIAS,WP_ENDOCHONDRAL_OSSIFICATION	0.376469	0.000199176	['MGP', 'TGFB2', 'IGF1', 'HMGCS1', 'COL10A1', 'ALPL', 'PTHLH', 'SPP1', 'ENPP1', 'ACAN', 'FGF2', 'BMP6', 'CTSV', 'SOX5', 'TIMP3', 'ADAMTS5', 'SOX9', 'SOX6', 'RUNX2', 'PLAT', 'PLAU', 'MMP9']	['MGP:-', 'TGFB2:+', 'IGF1:-', 'HMGCS1:+', 'COL10A1:-', 'ALPL:-', 'PTHLH:-', 'SPP1:-', 'ENPP1:-', 'ACAN:+', 'FGF2:-', 'BMP6:-', 'CTSV:-', 'SOX5:+', 'TIMP3:+', 'ADAMTS5:-', 'SOX9:-', 'SOX6:-', 'RUNX2:-', 'PLAT:+', 'PLAU:-', 'MMP9:-']
93	PID_ENDOTHELIN_PATHWAY	0.3761	0.000205789	['MMP1', 'EDNRB', 'COL3A1', 'PRKCQ', 'ADCY8', 'COL1A2', 'GNA14', 'ADCY5', 'ADCY2', 'TRPC6', 'EDN2', 'PLCB1', 'PRKCB', 'EDN1']	['MMP1:-', 'EDNRB:+', 'COL3A1:-', 'PRKCQ:-', 'ADCY8:+', 'COL1A2:-', 'GNA14:+', 'ADCY5:-', 'ADCY2:-', 'TRPC6:+', 'EDN2:-', 'PLCB1:-', 'PRKCB:-', 'EDN1:-']
94	REACTOME_CELL_CELL_COMMUNICATION	0.37557	0.000215151	['CDH1', 'LAMA3', 'LAMC2', 'CDH3', 'COL17A1', 'CLDN18', 'ITGA6', 'CDH6', 'CLDN16', 'SFTPA1', 'PATJ', 'SFTPD', 'CDH11', 'CDH13', 'SDK1', 'KIRREL3', 'CDH8', 'CDH12', 'CLDN1', 'CDH2', 'CADM2', 'CDH4', 'CADM1', 'CLDN5', 'SFTPA2', 'KRT5', 'KRT14', 'LAMB3']	['CDH1:-', 'LAMA3:+', 'LAMC2:-', 'CDH3:-', 'COL17A1:-', 'CLDN18:+', 'ITGA6:-', 'CDH6:-', 'CLDN16:-', 'SFTPA1:+', 'PATJ:+', 'SFTPD:+', 'CDH11:-', 'CDH13:+', 'SDK1:+', 'KIRREL3:-', 'CDH8:+', 'CDH12:+', 'CLDN1:-', 'CDH2:-', 'CADM2:+', 'CDH4:+', 'CADM1:+', 'CLDN5:-', 'SFTPA2:+', 'KRT5:-', 'KRT14:-', 'LAMB3:-']
95	WP_LUNG_FIBROSIS	0.374906	0.000227104	['CCL4', 'SFTPA1', 'SERPINA1', 'HMOX1', 'IGF1', 'CCL2', 'SFTPC', 'SFTPA2', 'MUC5B', 'IL6', 'ATP11A', 'EDN1', 'FAM13A', 'SPP1', 'CSF3', 'FGF7', 'CSF2', 'CXCL2', 'ELN', 'FGF2', 'EGF', 'FGF1', 'CXCL8', 'TIMP1', 'CCN2', 'PTX3', 'GREM1', 'PLAU', 'MMP9']	['CCL4:-', 'SFTPA1:+', 'SERPINA1:-', 'HMOX1:+', 'IGF1:-', 'CCL2:-', 'SFTPC:+', 'SFTPA2:+', 'MUC5B:-', 'IL6:-', 'ATP11A:+', 'EDN1:-', 'FAM13A:-', 'SPP1:-', 'CSF3:+', 'FGF7:-', 'CSF2:+', 'CXCL2:-', 'ELN:-', 'FGF2:-', 'EGF:-', 'FGF1:-', 'CXCL8:-', 'TIMP1:-', 'CCN2:-', 'PTX3:-', 'GREM1:-', 'PLAU:-', 'MMP9:-']
96	REACTOME_PROTEIN_PROTEIN_INTERACTIONS_AT_SYNAPSES	0.373098	0.000260331	['NRXN3', 'SYT1', 'EPB41L3', 'EPB41L1', 'APBA1', 'SYT10', 'LIN7A', 'EPB41L5', 'PPFIA2', 'NTRK3', 'NLGN4X', 'DLG2', 'HOMER1', 'PTPRD', 'GRIA1', 'SHANK2', 'NLGN4Y', 'GRM5', 'IL1RAPL1', 'NLGN1', 'DLGAP1', 'LRRTM4', 'NRXN1', 'GRIN2A', 'IL1RAPL2', 'DLGAP2', 'LRRTM3', 'GRIN2B']	['NRXN3:+', 'SYT1:-', 'EPB41L3:+', 'EPB41L1:-', 'APBA1:-', 'SYT10:-', 'LIN7A:+', 'EPB41L5:+', 'PPFIA2:-', 'NTRK3:-', 'NLGN4X:-', 'DLG2:-', 'HOMER1:-', 'PTPRD:-', 'GRIA1:+', 'SHANK2:-', 'NLGN4Y:-', 'GRM5:-', 'IL1RAPL1:-', 'NLGN1:-', 'DLGAP1:+', 'LRRTM4:+', 'NRXN1:-', 'GRIN2A:-', 'IL1RAPL2:-', 'DLGAP2:-', 'LRRTM3:+', 'GRIN2B:+']
97	REACTOME_HS_GAG_BIOSYNTHESIS	0.372473	0.000273906	['HS3ST1', 'GPC4', 'HS3ST2', 'SDC4', 'GPC3', 'HS3ST3A1', 'HS6ST2', 'GPC5', 'EXT1', 'HS3ST4', 'GPC6', 'HS6ST3', 'HS3ST5']	['HS3ST1:-', 'GPC4:-', 'HS3ST2:-', 'SDC4:-', 'GPC3:+', 'HS3ST3A1:-', 'HS6ST2:-', 'GPC5:-', 'EXT1:+', 'HS3ST4:-', 'GPC6:-', 'HS6ST3:-', 'HS3ST5:+']
98	REACTOME_DISEASES_ASSOCIATED_WITH_O_GLYCOSYLATION_OF_PROTEINS	0.372072	0.000283584	['THSD7A', 'ADAMTS6', 'SEMA5A', 'MUC5B', 'ADAMTS8', 'THBS1', 'ADAMTS14', 'ADAMTS17', 'ADAMTS18', 'THSD7B', 'MUC4', 'ADAMTS16', 'ADAMTS12', 'ADAMTS5', 'ADAMTS3', 'ADAMTSL3', 'ADAMTS9', 'MUC13', 'ADAMTSL1', 'MUC16', 'MUC6', 'THBS2', 'THSD4', 'ADAMTSL2', 'MUC5AC', 'SPON1']	['THSD7A:-', 'ADAMTS6:-', 'SEMA5A:+', 'MUC5B:-', 'ADAMTS8:+', 'THBS1:-', 'ADAMTS14:-', 'ADAMTS17:+', 'ADAMTS18:-', 'THSD7B:-', 'MUC4:-', 'ADAMTS16:-', 'ADAMTS12:-', 'ADAMTS5:-', 'ADAMTS3:-', 'ADAMTSL3:+', 'ADAMTS9:-', 'MUC13:-', 'ADAMTSL1:-', 'MUC16:-', 'MUC6:+', 'THBS2:-', 'THSD4:-', 'ADAMTSL2:-', 'MUC5AC:-', 'SPON1:-']
99	REACTOME_PRESYNAPTIC_DEPOLARIZATION_AND_CALCIUM_CHANNEL_OPENING	0.370633	0.000316158	['CACNA2D2', 'CACNG4', 'CACNA1A', 'CACNA1B', 'CACNA2D3', 'CACNB2', 'CACNB4', 'CACNA1E']	['CACNA2D2:+', 'CACNG4:-', 'CACNA1A:-', 'CACNA1B:-', 'CACNA2D3:+', 'CACNB2:+', 'CACNB4:+', 'CACNA1E:-']
100	REACTOME_ASSEMBLY_AND_CELL_SURFACE_PRESENTATION_OF_NMDA_RECEPTORS	0.370593	0.000318962	['CAMK2B', 'APBA1', 'LIN7A', 'DLG2', 'NBEA', 'GRIN2A', 'TUBB4B', 'GRIN2B']	['CAMK2B:-', 'APBA1:-', 'LIN7A:+', 'DLG2:-', 'NBEA:-', 'GRIN2A:-', 'TUBB4B:-', 'GRIN2B:+']
101	REACTOME_NERVOUS_SYSTEM_DEVELOPMENT	0.369415	0.000348875	['CNTN1', 'EPHA3', 'NTN1', 'PRKCQ', 'NTN4', 'SEMA3A', 'PAK3', 'EPHA6', 'COL5A3', 'COL4A4', 'NRCAM', 'LAMB1', 'SEMA6A', 'EZR', 'MMP9', 'PAK5', 'MYH14', 'MET', 'SH3GL2', 'CXCL12', 'CAP2', 'ADGRG6', 'SEMA5A', 'ST8SIA4', 'DPYSL3', 'EPHA4', 'NRP2', 'EFNB2', 'FLRT3', 'COL5A1', 'MYH10', 'TRPC4', 'EPHB2', 'MYH11', 'CNTN6', 'CHL1', 'COL4A2', 'EPHA7', 'SCN2A', 'SCN7A', 'TRPC6', 'YAP1', 'SEMA6D', 'SCN1A', '…	['CNTN1:+', 'EPHA3:-', 'NTN1:-', 'PRKCQ:-', 'NTN4:+', 'SEMA3A:-', 'PAK3:-', 'EPHA6:+', 'COL5A3:-', 'COL4A4:+', 'NRCAM:-', 'LAMB1:-', 'SEMA6A:+', 'EZR:-', 'MMP9:-', 'PAK5:+', 'MYH14:-', 'MET:-', 'SH3GL2:+', 'CXCL12:-', 'CAP2:-', 'ADGRG6:+', 'SEMA5A:+', 'ST8SIA4:-', 'DPYSL3:-', 'EPHA4:-', 'NRP2:-', 'EFNB2:+', 'FLRT3:+', 'COL5A1:-', 'MYH10:+', 'TRPC4:-', 'EPHB2:-', 'MYH11:-', 'CNTN6:+', 'CHL1:-', 'C…
102	REACTOME_RHO_GTPASE_EFFECTORS	0.368052	0.000386431	['CFTR', 'CDH1', 'MYLK', 'PRKCZ', 'PAK3', 'MYH14', 'CENPF', 'WIPF3', 'CIT', 'MYH10', 'MYH11', 'DIAPH3', 'PRKCB', 'SCAI', 'SFN', 'TUBB4B', 'CENPP']	['CFTR:+', 'CDH1:-', 'MYLK:+', 'PRKCZ:+', 'PAK3:-', 'MYH14:-', 'CENPF:-', 'WIPF3:-', 'CIT:-', 'MYH10:+', 'MYH11:-', 'DIAPH3:+', 'PRKCB:-', 'SCAI:+', 'SFN:-', 'TUBB4B:-', 'CENPP:-']
103	KEGG_VIRAL_MYOCARDITIS	0.367762	0.000396793	['ICAM1', 'MYH14', 'DMD', 'SGCD', 'CD55', 'LAMA2', 'CAV1', 'MYH11', 'MYH10']	['ICAM1:-', 'MYH14:-', 'DMD:-', 'SGCD:-', 'CD55:+', 'LAMA2:-', 'CAV1:-', 'MYH11:-', 'MYH10:+']
104	REACTOME_SIGNALING_BY_RECEPTOR_TYROSINE_KINASES	0.367691	0.000401227	['ANOS1', 'IGF1', 'LAMC3', 'LAMA3', 'LAMC2', 'COL11A1', 'FGFR2', 'PRKCZ', 'FGF10', 'PAG1', 'PAK3', 'COL5A3', 'COL4A4', 'DOCK3', 'LAMB1', 'ITPR3', 'PCSK5', 'MMP9', 'FLT1', 'PLAT', 'HPN', 'CAV1', 'MET', 'PTPRZ1', 'SH3GL2', 'CXCL12', 'COL1A1', 'AREG', 'SPARC', 'FGF1', 'FN1', 'F3', 'NRP2', 'SPP1', 'EREG', 'FOSB', 'FLRT3', 'KDR', 'TPH1', 'APOE', 'COL5A1', 'TNS4', 'NGF', 'COL4A2', 'KLB', 'FGFBP1', 'YAP…	['ANOS1:+', 'IGF1:-', 'LAMC3:+', 'LAMA3:+', 'LAMC2:-', 'COL11A1:-', 'FGFR2:-', 'PRKCZ:+', 'FGF10:+', 'PAG1:+', 'PAK3:-', 'COL5A3:-', 'COL4A4:+', 'DOCK3:-', 'LAMB1:-', 'ITPR3:+', 'PCSK5:-', 'MMP9:-', 'FLT1:+', 'PLAT:+', 'HPN:+', 'CAV1:-', 'MET:-', 'PTPRZ1:-', 'SH3GL2:+', 'CXCL12:-', 'COL1A1:-', 'AREG:-', 'SPARC:-', 'FGF1:-', 'FN1:-', 'F3:-', 'NRP2:-', 'SPP1:-', 'EREG:-', 'FOSB:-', 'FLRT3:+', 'KDR:…
105	WP_SEROTONIN_AND_ANXIETY	0.364583	0.000501361	['ADRA1A', 'PRKCB', 'CAMK2B']	['ADRA1A:+', 'PRKCB:-', 'CAMK2B:-']
106	WP_SPINAL_CORD_INJURY	0.362418	0.000585493	['VCAN', 'AQP1', 'CCL2', 'NOS1', 'TACR1', 'SLIT2', 'EPHA4', 'ROS1', 'PLA2G2A', 'PLA2G5', 'ICAM1', 'SOX9', 'ANXA1', 'NOX4', 'NTN1', 'IL1R1', 'SEMA6A', 'IL6', 'CXCL1', 'PTGS2', 'EFNB2', 'C5', 'XYLT1', 'COL4A1', 'ACAN', 'CXCL2', 'CXCL8', 'EGFR', 'SLIT3', 'BDNF', 'PTPRZ1', 'MMP9', 'CXCL10']	['VCAN:-', 'AQP1:+', 'CCL2:-', 'NOS1:+', 'TACR1:-', 'SLIT2:+', 'EPHA4:-', 'ROS1:-', 'PLA2G2A:-', 'PLA2G5:-', 'ICAM1:-', 'SOX9:-', 'ANXA1:-', 'NOX4:-', 'NTN1:-', 'IL1R1:-', 'SEMA6A:+', 'IL6:-', 'CXCL1:-', 'PTGS2:-', 'EFNB2:+', 'C5:+', 'XYLT1:-', 'COL4A1:-', 'ACAN:+', 'CXCL2:-', 'CXCL8:-', 'EGFR:+', 'SLIT3:+', 'BDNF:+', 'PTPRZ1:-', 'MMP9:-', 'CXCL10:-']
107	REACTOME_DEVELOPMENTAL_BIOLOGY	0.362389	0.000590339	['SPAG9', 'MAMLD1', 'CNTN1', 'EPHA3', 'NTN1', 'PRKCQ', 'FGF10', 'NTN4', 'SEMA3A', 'CACNG4', 'PAK3', 'EPHA6', 'COL5A3', 'COL4A4', 'NRCAM', 'LAMB1', 'SEMA6A', 'EZR', 'MMP9', 'HNF4A', 'PAK5', 'KLF5', 'MYH14', 'MET', 'SH3GL2', 'CXCL12', 'PPARGC1A', 'KRT18', 'CAP2', 'ADGRG6', 'SEMA5A', 'ST8SIA4', 'DPYSL3', 'ADAM23', 'EPAS1', 'EPHA4', 'NR5A2', 'NRP2', 'CSF3R', 'ACVR1C', 'EFNB2', 'SOX9', 'FLRT3', 'KRT17…	['SPAG9:-', 'MAMLD1:-', 'CNTN1:+', 'EPHA3:-', 'NTN1:-', 'PRKCQ:-', 'FGF10:+', 'NTN4:+', 'SEMA3A:-', 'CACNG4:-', 'PAK3:-', 'EPHA6:+', 'COL5A3:-', 'COL4A4:+', 'NRCAM:-', 'LAMB1:-', 'SEMA6A:+', 'EZR:-', 'MMP9:-', 'HNF4A:-', 'PAK5:+', 'KLF5:-', 'MYH14:-', 'MET:-', 'SH3GL2:+', 'CXCL12:-', 'PPARGC1A:+', 'KRT18:-', 'CAP2:-', 'ADGRG6:+', 'SEMA5A:+', 'ST8SIA4:-', 'DPYSL3:-', 'ADAM23:-', 'EPAS1:+', 'EPHA4:…
108	REACTOME_METABOLISM_OF_VITAMINS_AND_COFACTORS	0.36167	0.000624009	['CD38', 'PTGS2', 'GPC4', 'LRP2', 'VNN1', 'SDC4', 'PTGIS', 'LDLR', 'APOE', 'ENPP2', 'AOX1', 'PPCDC', 'GPC3', 'ENPP3', 'NMNAT2', 'MTHFD2L', 'GPC5', 'GPC6', 'RNLS', 'AKR1C1', 'ENPP1', 'SLC5A8', 'ACACA']	['CD38:-', 'PTGS2:-', 'GPC4:-', 'LRP2:+', 'VNN1:-', 'SDC4:-', 'PTGIS:-', 'LDLR:-', 'APOE:-', 'ENPP2:-', 'AOX1:+', 'PPCDC:+', 'GPC3:+', 'ENPP3:-', 'NMNAT2:-', 'MTHFD2L:-', 'GPC5:-', 'GPC6:-', 'RNLS:+', 'AKR1C1:-', 'ENPP1:-', 'SLC5A8:-', 'ACACA:+']
109	NABA_ECM_REGULATORS	0.358142	0.00079713	['ADAM12', 'ADAM23', 'ADAM28', 'ADAMTS12', 'ADAMTS14', 'ADAMTS16', 'ADAMTS17', 'ADAMTS18', 'ADAMTS3', 'ADAMTS5', 'ADAMTS6', 'ADAMTS8', 'ADAMTS9', 'ADAMTSL1', 'ADAMTSL2', 'ADAMTSL3', 'BMP1', 'CTSE', 'CTSH', 'CTSV', 'EGLN3', 'FAM20A', 'FAM20C', 'HPSE2', 'P3H2', 'LOXL4', 'MMP1', 'MMP10', 'MMP11', 'MMP16', 'MMP19', 'MMP28', 'MMP7', 'MMP9', 'PAMR1', 'PAPPA', 'PAPPA2', 'PCSK5', 'PCSK6', 'PLAT', 'PLAU',…	['ADAM12:-', 'ADAM23:-', 'ADAM28:-', 'ADAMTS12:-', 'ADAMTS14:-', 'ADAMTS16:-', 'ADAMTS17:+', 'ADAMTS18:-', 'ADAMTS3:-', 'ADAMTS5:-', 'ADAMTS6:-', 'ADAMTS8:+', 'ADAMTS9:-', 'ADAMTSL1:-', 'ADAMTSL2:-', 'ADAMTSL3:+', 'BMP1:-', 'CTSE:-', 'CTSH:+', 'CTSV:-', 'EGLN3:-', 'FAM20A:-', 'FAM20C:-', 'HPSE2:-', 'P3H2:+', 'LOXL4:-', 'MMP1:-', 'MMP10:-', 'MMP11:-', 'MMP16:-', 'MMP19:-', 'MMP28:-', 'MMP7:-', 'MM…
110	KEGG_SMALL_CELL_LUNG_CANCER	0.357884	0.000816242	['FN1', 'BIRC3', 'COL4A6', 'COL4A1', 'COL4A2', 'PTGS2', 'COL4A4', 'LAMC2', 'LAMB3', 'LAMB1', 'LAMA3', 'LAMA2', 'FHIT', 'ITGA6', 'ITGA2', 'BCL2L1', 'LAMC3', 'CCNE2']	['FN1:-', 'BIRC3:-', 'COL4A6:-', 'COL4A1:-', 'COL4A2:-', 'PTGS2:-', 'COL4A4:+', 'LAMC2:-', 'LAMB3:-', 'LAMB1:-', 'LAMA3:+', 'LAMA2:-', 'FHIT:-', 'ITGA6:-', 'ITGA2:-', 'BCL2L1:-', 'LAMC3:+', 'CCNE2:-']
111	REACTOME_CYTOKINE_SIGNALING_IN_IMMUNE_SYSTEM	0.357489	0.000843505	['CRLF1', 'IL20RA', 'BIRC3', 'CAMK2B', 'PTGS2', 'CXCL2', 'ICAM1', 'HMOX1', 'MMP9', 'MID1', 'TIMP1', 'CCL22', 'PTPRZ1', 'CSF3', 'CCL2', 'MAPK10', 'SOD2', 'PRLR', 'LIFR', 'CCL20', 'FN1', 'IL1R2', 'IL1R1', 'CSF3R', 'IL13RA2', 'TNFSF14', 'LIF', 'TRIM5', 'SNAP25', 'IL2RA', 'ANXA1', 'CD36', 'IL6', 'IL1RN', 'IRF4', 'FGF2', 'DUSP6', 'LCN2', 'PTPRJ', 'NCAM1', 'IL18', 'IL34', 'EDA', 'SQSTM1', 'ALOX15', 'VC…	['CRLF1:-', 'IL20RA:+', 'BIRC3:-', 'CAMK2B:-', 'PTGS2:-', 'CXCL2:-', 'ICAM1:-', 'HMOX1:+', 'MMP9:-', 'MID1:-', 'TIMP1:-', 'CCL22:-', 'PTPRZ1:-', 'CSF3:+', 'CCL2:-', 'MAPK10:-', 'SOD2:+', 'PRLR:+', 'LIFR:+', 'CCL20:-', 'FN1:-', 'IL1R2:+', 'IL1R1:-', 'CSF3R:+', 'IL13RA2:-', 'TNFSF14:-', 'LIF:-', 'TRIM5:-', 'SNAP25:-', 'IL2RA:-', 'ANXA1:-', 'CD36:+', 'IL6:-', 'IL1RN:-', 'IRF4:-', 'FGF2:-', 'DUSP6:+'…
112	PID_IL4_2PATHWAY	0.357346	0.000857083	['COL1A1', 'ALOX15', 'IRF4', 'IL13RA2', 'TFF3', 'PIGR', 'COL1A2', 'BCL2L1']	['COL1A1:-', 'ALOX15:-', 'IRF4:-', 'IL13RA2:-', 'TFF3:-', 'PIGR:-', 'COL1A2:-', 'BCL2L1:-']
113	WP_BURN_WOUND_HEALING	0.35458	0.0010364	['TGFB2', 'CCL2', 'TNC', 'TAGLN', 'SCEL', 'ADAM12', 'ICAM1', 'FBN1', 'TIMP1', 'SMAD3', 'KDR', 'CXCL12', 'SFRP2', 'MMP28', 'FN1', 'ACHE', 'NOX4', 'CXCL14', 'IL6', 'CXCL1', 'SPARC', 'ELN', 'EGF', 'COL1A2', 'CXCL8', 'COL1A1', 'KRT6A', 'FGFR2', 'INHBA', 'MMP1', 'MMP9']	['TGFB2:+', 'CCL2:-', 'TNC:-', 'TAGLN:-', 'SCEL:+', 'ADAM12:-', 'ICAM1:-', 'FBN1:-', 'TIMP1:-', 'SMAD3:-', 'KDR:+', 'CXCL12:-', 'SFRP2:-', 'MMP28:-', 'FN1:-', 'ACHE:-', 'NOX4:-', 'CXCL14:-', 'IL6:-', 'CXCL1:-', 'SPARC:-', 'ELN:-', 'EGF:-', 'COL1A2:-', 'CXCL8:-', 'COL1A1:-', 'KRT6A:-', 'FGFR2:-', 'INHBA:-', 'MMP1:-', 'MMP9:-']
114	BIOCARTA_RHO_PATHWAY	0.354147	0.00107329	['ARHGAP6', 'PIP5K1B']	['ARHGAP6:+', 'PIP5K1B:+']
115	PID_SYNDECAN_4_PATHWAY	0.353883	0.00109932	['FGF2', 'MMP9', 'ADAM12', 'THBS1', 'FN1', 'TNC', 'LAMA3', 'SDC4', 'CXCL12']	['FGF2:-', 'MMP9:-', 'ADAM12:-', 'THBS1:-', 'FN1:-', 'TNC:-', 'LAMA3:+', 'SDC4:-', 'CXCL12:-']
116	REACTOME_METABOLISM_OF_AMINO_ACIDS_AND_DERIVATIVES	0.35007	0.00141783	['AASS', 'BCAT1', 'ARG2', 'PRODH', 'SLC5A5', 'GLS', 'KYNU', 'BBOX1', 'TPH1', 'SAT1', 'IDO1', 'DMGDH', 'SDS', 'DUOX1', 'ACMSD', 'RIMKLB', 'RIMKLA', 'SLC25A21', 'PAPSS2', 'DIO2', 'INMT']	['AASS:+', 'BCAT1:-', 'ARG2:+', 'PRODH:+', 'SLC5A5:-', 'GLS:+', 'KYNU:-', 'BBOX1:-', 'TPH1:-', 'SAT1:-', 'IDO1:-', 'DMGDH:-', 'SDS:-', 'DUOX1:+', 'ACMSD:-', 'RIMKLB:+', 'RIMKLA:+', 'SLC25A21:-', 'PAPSS2:+', 'DIO2:-', 'INMT:+']
117	REACTOME_MOLECULES_ASSOCIATED_WITH_ELASTIC_FIBRES	0.350037	0.00143039	['LTBP1', 'ELN', 'FBLN1', 'ITGA8', 'TGFB2', 'ITGB8', 'ITGB6', 'FN1', 'LTBP2', 'BMP2', 'FBN2', 'FBN1', 'MFAP5']	['LTBP1:-', 'ELN:-', 'FBLN1:-', 'ITGA8:+', 'TGFB2:+', 'ITGB8:-', 'ITGB6:-', 'FN1:-', 'LTBP2:-', 'BMP2:-', 'FBN2:-', 'FBN1:-', 'MFAP5:-']
118	WP_OLIGODENDROCYTE_SPECIFICATION_AND_DIFFERENTIATION_LEADING_TO_MYELIN_COMPONENTS_FOR_CNS	0.349108	0.00152854	['BMP2', 'CXCL2', 'FGF2', 'IGF1', 'SHH', 'LIF', 'SOX5', 'SOX9', 'SOX6', 'CXCL1', 'GLI2']	['BMP2:-', 'CXCL2:-', 'FGF2:-', 'IGF1:-', 'SHH:-', 'LIF:-', 'SOX5:+', 'SOX9:-', 'SOX6:-', 'CXCL1:-', 'GLI2:-']
119	REACTOME_INTERLEUKIN_4_AND_INTERLEUKIN_13_SIGNALING	0.348372	0.00161312	['PTGS2', 'ICAM1', 'HMOX1', 'MMP9', 'TIMP1', 'CCL22', 'CCL2', 'FN1', 'IL13RA2', 'LIF', 'ANXA1', 'CD36', 'IL6', 'IRF4', 'FGF2', 'LCN2', 'IL18', 'ALOX15', 'VCAM1', 'COL1A2', 'CXCL8', 'BCL2L1', 'SAA1', 'MAOA', 'MMP1']	['PTGS2:-', 'ICAM1:-', 'HMOX1:+', 'MMP9:-', 'TIMP1:-', 'CCL22:-', 'CCL2:-', 'FN1:-', 'IL13RA2:-', 'LIF:-', 'ANXA1:-', 'CD36:+', 'IL6:-', 'IRF4:-', 'FGF2:-', 'LCN2:-', 'IL18:-', 'ALOX15:-', 'VCAM1:-', 'COL1A2:-', 'CXCL8:-', 'BCL2L1:-', 'SAA1:-', 'MAOA:+', 'MMP1:-']
120	WP_AMPACTIVATED_PROTEIN_KINASE_AMPK_SIGNALING	0.347228	0.00174671	['HNF4A', 'INSR', 'CCNA1', 'ACACA', 'PLCB1', 'ADRA1A']	['HNF4A:-', 'INSR:-', 'CCNA1:-', 'ACACA:+', 'PLCB1:-', 'ADRA1A:+']
121	WP_SMALL_CELL_LUNG_CANCER	0.346864	0.00179984	['FHIT', 'LAMB3', 'BCL2L1', 'LAMC2', 'LAMB1', 'ITGA6', 'CCNE2', 'ITGA2', 'FN1', 'PTGS2', 'COL4A4', 'CKS2', 'COL4A3', 'COL4A2', 'COL4A1', 'BIRC3', 'LAMC3', 'LAMA2', 'COL4A6', 'LAMA3']	['FHIT:-', 'LAMB3:-', 'BCL2L1:-', 'LAMC2:-', 'LAMB1:-', 'ITGA6:-', 'CCNE2:-', 'ITGA2:-', 'FN1:-', 'PTGS2:-', 'COL4A4:+', 'CKS2:+', 'COL4A3:+', 'COL4A2:-', 'COL4A1:-', 'BIRC3:-', 'LAMC3:+', 'LAMA2:-', 'COL4A6:-', 'LAMA3:+']
122	WP_REGULATION_OF_ACTIN_CYTOSKELETON	0.346283	0.00188019	['RRAS2', 'PIK3C2G', 'PIP5K1B', 'MYH10', 'ITGA1', 'CHRM3', 'CHRM2', 'DIAPH3', 'FN1', 'MYLK', 'PAK3', 'PAK5', 'MAPK4', 'FGF7', 'EGF', 'FGF2', 'FGF1', 'EGFR', 'EZR', 'FGFR2', 'FGF14', 'FGF13', 'FGF12', 'FGF10']	['RRAS2:+', 'PIK3C2G:+', 'PIP5K1B:+', 'MYH10:+', 'ITGA1:+', 'CHRM3:+', 'CHRM2:+', 'DIAPH3:+', 'FN1:-', 'MYLK:+', 'PAK3:-', 'PAK5:+', 'MAPK4:+', 'FGF7:-', 'EGF:-', 'FGF2:-', 'FGF1:-', 'EGFR:+', 'EZR:-', 'FGFR2:-', 'FGF14:-', 'FGF13:-', 'FGF12:+', 'FGF10:+']
123	REACTOME_IMMUNOREGULATORY_INTERACTIONS_BETWEEN_A_LYMPHOID_AND_A_NON_LYMPHOID_CELL	0.345663	0.00196874	['CDH1', 'COL17A1', 'ICAM1', 'ICAM2', 'COL1A1', 'C3', 'SFTPD', 'COLEC12', 'VCAM1', 'COL1A2', 'COL3A1', 'IGHV3-23']	['CDH1:-', 'COL17A1:-', 'ICAM1:-', 'ICAM2:-', 'COL1A1:-', 'C3:-', 'SFTPD:+', 'COLEC12:+', 'VCAM1:-', 'COL1A2:-', 'COL3A1:-', 'IGHV3-23:-']
124	WP_MIRNA_TARGETS_IN_ECM_AND_MEMBRANE_RECEPTORS	0.345353	0.00202162	['COL5A3', 'COL4A2', 'COL4A1', 'COL3A1', 'COL1A2', 'ITGA11', 'THBS1', 'THBS2', 'ITGB6', 'ITGA1', 'COL6A3', 'COL5A2', 'FN1', 'COL5A1']	['COL5A3:-', 'COL4A2:-', 'COL4A1:-', 'COL3A1:-', 'COL1A2:-', 'ITGA11:-', 'THBS1:-', 'THBS2:-', 'ITGB6:-', 'ITGA1:+', 'COL6A3:-', 'COL5A2:-', 'FN1:-', 'COL5A1:-']
125	REACTOME_ELASTIC_FIBRE_FORMATION	0.345262	0.00204756	['LTBP1', 'ELN', 'FBLN1', 'ITGA8', 'TGFB2', 'ITGB8', 'ITGB6', 'FN1', 'LTBP2', 'BMP2', 'LOXL4', 'FBN2', 'FBN1', 'MFAP5']	['LTBP1:-', 'ELN:-', 'FBLN1:-', 'ITGA8:+', 'TGFB2:+', 'ITGB8:-', 'ITGB6:-', 'FN1:-', 'LTBP2:-', 'BMP2:-', 'LOXL4:-', 'FBN2:-', 'FBN1:-', 'MFAP5:-']
126	WP_7Q1123_COPY_NUMBER_VARIATION_SYNDROME	0.343723	0.00227048	['NRG1', 'CLDN1', 'GRIP1', 'FBN1', 'ACACA', 'CLDN5', 'PRKG1', 'GTF2IRD1', 'ELN', 'SQSTM1', 'SNAP25']	['NRG1:-', 'CLDN1:-', 'GRIP1:-', 'FBN1:-', 'ACACA:+', 'CLDN5:-', 'PRKG1:+', 'GTF2IRD1:-', 'ELN:-', 'SQSTM1:+', 'SNAP25:-']
127	REACTOME_DISEASES_OF_METABOLISM	0.342401	0.00248244	['GCLC', 'CYP26B1', 'THSD7A', 'CYP24A1', 'VCAN', 'ADAMTS6', 'GPC4', 'PGM1', 'SEMA5A', 'MUC5B', 'SFTPA1', 'SDC4', 'SFTPD', 'ADAMTS8', 'THBS1', 'CYP1B1', 'ADAMTS14', 'LUM', 'ADAMTS17', 'ADAMTS18', 'THSD7B', 'MUC4', 'ADAMTS16', 'GPC3', 'ADAMTS12', 'ADAMTS5', 'ADAMTS3', 'ADAMTSL3', 'SLC34A2', 'ACAN', 'ADAMTS9', 'ABCA3', 'SFTPC', 'SFTPB', 'CYP7B1', 'MUC13', 'ADAMTSL1', 'GPC5', 'MUC16', 'EXT1', 'BGN', …	['GCLC:-', 'CYP26B1:-', 'THSD7A:-', 'CYP24A1:-', 'VCAN:-', 'ADAMTS6:-', 'GPC4:-', 'PGM1:-', 'SEMA5A:+', 'MUC5B:-', 'SFTPA1:+', 'SDC4:-', 'SFTPD:+', 'ADAMTS8:+', 'THBS1:-', 'CYP1B1:-', 'ADAMTS14:-', 'LUM:-', 'ADAMTS17:+', 'ADAMTS18:-', 'THSD7B:-', 'MUC4:-', 'ADAMTS16:-', 'GPC3:+', 'ADAMTS12:-', 'ADAMTS5:-', 'ADAMTS3:-', 'ADAMTSL3:+', 'SLC34A2:-', 'ACAN:+', 'ADAMTS9:-', 'ABCA3:+', 'SFTPC:+', 'SFTPB…
128	REACTOME_NEUREXINS_AND_NEUROLIGINS	0.341627	0.0026227	['NRXN3', 'SYT1', 'EPB41L3', 'EPB41L1', 'APBA1', 'SYT10', 'LIN7A', 'EPB41L5', 'NLGN4X', 'DLG2', 'HOMER1', 'SHANK2', 'NLGN4Y', 'GRM5', 'NLGN1', 'DLGAP1', 'LRRTM4', 'NRXN1', 'GRIN2A', 'DLGAP2', 'LRRTM3', 'GRIN2B']	['NRXN3:+', 'SYT1:-', 'EPB41L3:+', 'EPB41L1:-', 'APBA1:-', 'SYT10:-', 'LIN7A:+', 'EPB41L5:+', 'NLGN4X:-', 'DLG2:-', 'HOMER1:-', 'SHANK2:-', 'NLGN4Y:-', 'GRM5:-', 'NLGN1:-', 'DLGAP1:+', 'LRRTM4:+', 'NRXN1:-', 'GRIN2A:-', 'DLGAP2:-', 'LRRTM3:+', 'GRIN2B:+']
129	BIOCARTA_TSP1_PATHWAY	0.340534	0.00282523	['CD36', 'THBS1']	['CD36:+', 'THBS1:-']
130	REACTOME_VISUAL_PHOTOTRANSDUCTION	0.340424	0.00286524	['PRKCQ', 'DHRS9', 'GPC4', 'LRP2', 'SDC4', 'GNGT1', 'LDLR', 'APOE', 'GPC3', 'GPC5', 'GPC6', 'AKR1C1', 'ABCA4']	['PRKCQ:-', 'DHRS9:-', 'GPC4:-', 'LRP2:+', 'SDC4:-', 'GNGT1:-', 'LDLR:-', 'APOE:-', 'GPC3:+', 'GPC5:-', 'GPC6:-', 'AKR1C1:-', 'ABCA4:-']
131	REACTOME_CHONDROITIN_SULFATE_BIOSYNTHESIS	0.340165	0.0029326	['VCAN', 'CHST9', 'BGN', 'CHSY3']	['VCAN:-', 'CHST9:-', 'BGN:-', 'CHSY3:-']
132	REACTOME_TRAFFICKING_OF_AMPA_RECEPTORS	0.33826	0.00331733	['CAMK2B', 'CACNG4', 'EPB41L1', 'MDM2', 'GRIA1', 'GRIP1', 'PRKCB', 'MYO6']	['CAMK2B:-', 'CACNG4:-', 'EPB41L1:-', 'MDM2:-', 'GRIA1:+', 'GRIP1:-', 'PRKCB:-', 'MYO6:+']
133	KEGG_REGULATION_OF_ACTIN_CYTOSKELETON	0.337512	0.00349665	['FN1', 'RRAS2', 'ITGA11', 'MYLK', 'MYH10', 'FGF7', 'PDGFD', 'FGF1', 'FGF2', 'FGFR2', 'FGF14', 'FGF10', 'FGF12', 'FGF13', 'ITGA8', 'ITGA9', 'MYH14', 'DIAPH3', 'ITGB6', 'PIP5K1B', 'CHRM2', 'CHRM3', 'ITGB8', 'PAK5', 'EZR', 'PAK3', 'EGFR', 'EGF', 'ITGA6', 'ITGA2', 'ITGA1']	['FN1:-', 'RRAS2:+', 'ITGA11:-', 'MYLK:+', 'MYH10:+', 'FGF7:-', 'PDGFD:-', 'FGF1:-', 'FGF2:-', 'FGFR2:-', 'FGF14:-', 'FGF10:+', 'FGF12:+', 'FGF13:-', 'ITGA8:+', 'ITGA9:-', 'MYH14:-', 'DIAPH3:+', 'ITGB6:-', 'PIP5K1B:+', 'CHRM2:+', 'CHRM3:+', 'ITGB8:-', 'PAK5:+', 'EZR:-', 'PAK3:-', 'EGFR:+', 'EGF:-', 'ITGA6:-', 'ITGA2:-', 'ITGA1:+']
134	WP_MRNA_PROCESSING	0.337125	0.00360619	['CELF2']	['CELF2:+']
135	REACTOME_REGULATION_OF_INSULIN_LIKE_GROWTH_FACTOR_IGF_TRANSPORT_AND_UPTAKE_BY_INSULIN_LIKE_GROWTH_FACTOR_BINDING_PROTEINS_IGFBPS	0.335092	0.00410313	['IGF1', 'VCAN', 'TNC', 'CP', 'LTBP1', 'FSTL3', 'BPIFB2', 'LAMB1', 'TIMP1', 'FAM20A', 'EVA1A', 'FN1', 'IGFBP2', 'IGFBP5', 'PAPPA2', 'SPP1', 'C3', 'APOE', 'MATN3', 'IL6', 'MFGE8', 'CCN1', 'IGFBP3', 'GPC3', 'PRSS23', 'SPARCL1', 'IGFBP7', 'FBN1', 'CDH2', 'FGG', 'FGA', 'FAM20C', 'PAPPA', 'AMTN', 'MMP1', 'SERPINA1']	['IGF1:-', 'VCAN:-', 'TNC:-', 'CP:-', 'LTBP1:-', 'FSTL3:-', 'BPIFB2:-', 'LAMB1:-', 'TIMP1:-', 'FAM20A:-', 'EVA1A:+', 'FN1:-', 'IGFBP2:-', 'IGFBP5:-', 'PAPPA2:-', 'SPP1:-', 'C3:-', 'APOE:-', 'MATN3:-', 'IL6:-', 'MFGE8:-', 'CCN1:-', 'IGFBP3:-', 'GPC3:+', 'PRSS23:-', 'SPARCL1:+', 'IGFBP7:-', 'FBN1:-', 'CDH2:-', 'FGG:+', 'FGA:-', 'FAM20C:-', 'PAPPA:-', 'AMTN:-', 'MMP1:-', 'SERPINA1:-']
136	REACTOME_GP1B_IX_V_ACTIVATION_SIGNALLING	0.33438	0.00431326	['COL1A1', 'VWF', 'COL1A2']	['COL1A1:-', 'VWF:+', 'COL1A2:-']
137	KEGG_FOCAL_ADHESION	0.333446	0.00459332	['FN1', 'IGF1', 'BIRC3', 'COMP', 'ITGA11', 'FLT1', 'RELN', 'LAMC2', 'LAMB3', 'LAMB1', 'MYLK', 'MET', 'COL11A1', 'LAMC3', 'THBS2', 'THBS1', 'VWF', 'PDGFD', 'MAPK10', 'RASGRF1', 'ITGA8', 'TNC', 'CAV1', 'COL5A3', 'COL6A3', 'COL5A2', 'ITGA9', 'COL5A1', 'COL4A6', 'COL3A1', 'COL4A1', 'COL4A2', 'COL4A4', 'SHC4', 'ITGB6', 'SPP1', 'COL1A1', 'COL1A2', 'TLN2', 'SHC3', 'VEGFC', 'ITGB8', 'PAK5', 'PAK3', 'PRKC…	['FN1:-', 'IGF1:-', 'BIRC3:-', 'COMP:-', 'ITGA11:-', 'FLT1:+', 'RELN:-', 'LAMC2:-', 'LAMB3:-', 'LAMB1:-', 'MYLK:+', 'MET:-', 'COL11A1:-', 'LAMC3:+', 'THBS2:-', 'THBS1:-', 'VWF:+', 'PDGFD:-', 'MAPK10:-', 'RASGRF1:+', 'ITGA8:+', 'TNC:-', 'CAV1:-', 'COL5A3:-', 'COL6A3:-', 'COL5A2:-', 'ITGA9:-', 'COL5A1:-', 'COL4A6:-', 'COL3A1:-', 'COL4A1:-', 'COL4A2:-', 'COL4A4:+', 'SHC4:-', 'ITGB6:-', 'SPP1:-', 'CO…
138	REACTOME_CRMPS_IN_SEMA3A_SIGNALING	0.331074	0.0053187	['SEMA3A', 'DPYSL3', 'PLXNA4']	['SEMA3A:-', 'DPYSL3:-', 'PLXNA4:-']
139	REACTOME_METABOLISM_OF_FAT_SOLUBLE_VITAMINS	0.328922	0.00607027	['GPC4', 'LRP2', 'SDC4', 'LDLR', 'APOE', 'GPC3', 'GPC5', 'GPC6', 'AKR1C1']	['GPC4:-', 'LRP2:+', 'SDC4:-', 'LDLR:-', 'APOE:-', 'GPC3:+', 'GPC5:-', 'GPC6:-', 'AKR1C1:-']
140	WP_CILIOPATHIES	0.328651	0.00621456	['CENPF', 'DYNC2H1', 'AK7', 'DNAI2', 'DNAI1', 'CCNO', 'HYDIN', 'EFHC1', 'CFAP53', 'PKHD1', 'DNAH11', 'TRAF3IP1', 'DRC1', 'GLI2', 'DNAH6', 'IFT57', 'RSPH1', 'RSPH9', 'DNAAF1', 'PKD1L1', 'NME9', 'RP1', 'DCDC2', 'CFAP52']	['CENPF:-', 'DYNC2H1:+', 'AK7:-', 'DNAI2:-', 'DNAI1:-', 'CCNO:-', 'HYDIN:-', 'EFHC1:-', 'CFAP53:-', 'PKHD1:-', 'DNAH11:-', 'TRAF3IP1:-', 'DRC1:-', 'GLI2:-', 'DNAH6:-', 'IFT57:-', 'RSPH1:-', 'RSPH9:-', 'DNAAF1:-', 'PKD1L1:-', 'NME9:-', 'RP1:-', 'DCDC2:+', 'CFAP52:-']
141	REACTOME_RHO_GTPASES_ACTIVATE_PAKS	0.327015	0.00687758	['MYLK', 'PAK3', 'MYH14', 'MYH10', 'MYH11']	['MYLK:+', 'PAK3:-', 'MYH14:-', 'MYH10:+', 'MYH11:-']
142	REACTOME_NON_INTEGRIN_MEMBRANE_ECM_INTERACTIONS	0.326977	0.00694799	['TNC', 'LAMC3', 'LAMA3', 'LAMC2', 'COL11A1', 'NTN4', 'COL5A3', 'COL4A4', 'LAMB1', 'ITGA6', 'COL1A1', 'FN1', 'COL10A1', 'SDC4', 'COL5A1', 'COL4A2', 'THBS1', 'FGF2', 'ITGA2', 'COL1A2', 'COL3A1', 'COL4A3', 'NRXN1', 'COL4A1', 'LAMA2', 'LAMB3', 'COL4A6', 'DMD', 'COL5A2']	['TNC:-', 'LAMC3:+', 'LAMA3:+', 'LAMC2:-', 'COL11A1:-', 'NTN4:+', 'COL5A3:-', 'COL4A4:+', 'LAMB1:-', 'ITGA6:-', 'COL1A1:-', 'FN1:-', 'COL10A1:-', 'SDC4:-', 'COL5A1:-', 'COL4A2:-', 'THBS1:-', 'FGF2:-', 'ITGA2:-', 'COL1A2:-', 'COL3A1:-', 'COL4A3:+', 'NRXN1:-', 'COL4A1:-', 'LAMA2:-', 'LAMB3:-', 'COL4A6:-', 'DMD:-', 'COL5A2:-']
143	REACTOME_ROBO_RECEPTORS_BIND_AKAP5	0.323783	0.00838434	['ROBO2']	['ROBO2:+']
144	REACTOME_ADRENOCEPTORS	0.323498	0.00858848	['ADRA1A']	['ADRA1A:+']
145	KEGG_MAPK_SIGNALING_PATHWAY	0.3233	0.00875514	['RRAS2', 'DUSP16', 'RASGRP3', 'TGFB2', 'BDNF', 'DUSP6', 'CACNG4', 'NFATC2', 'DUSP10', 'FGF7', 'FGF1', 'FGF2', 'IL1R2', 'CACNA2D3', 'MAPK10', 'PLA2G2A', 'MECOM', 'PLA2G5', 'FGFR2', 'RASGRF1', 'RASGRF2', 'FGF14', 'FGF10', 'FGF12', 'FGF13', 'CACNG6', 'CACNA2D2', 'NGF', 'MAP3K13', 'RASGRP1', 'CACNB2', 'CACNB4', 'PRKCB', 'CACNA1A', 'CACNA1D', 'CACNA1E', 'CACNA1B', 'CACNA1C', 'EGFR', 'EGF', 'IL1R1', '…	['RRAS2:+', 'DUSP16:-', 'RASGRP3:+', 'TGFB2:+', 'BDNF:+', 'DUSP6:+', 'CACNG4:-', 'NFATC2:-', 'DUSP10:-', 'FGF7:-', 'FGF1:-', 'FGF2:-', 'IL1R2:+', 'CACNA2D3:+', 'MAPK10:-', 'PLA2G2A:-', 'MECOM:-', 'PLA2G5:-', 'FGFR2:-', 'RASGRF1:+', 'RASGRF2:-', 'FGF14:-', 'FGF10:+', 'FGF12:+', 'FGF13:-', 'CACNG6:-', 'CACNA2D2:+', 'NGF:+', 'MAP3K13:-', 'RASGRP1:-', 'CACNB2:+', 'CACNB4:+', 'PRKCB:-', 'CACNA1A:-', '…
146	KEGG_HYPERTROPHIC_CARDIOMYOPATHY_HCM	0.32225	0.00935771	['CACNB2', 'CACNB4', 'ITGA9', 'IGF1', 'RYR2', 'CACNG6', 'TPM1', 'ITGA11', 'DMD', 'CACNA2D3', 'CACNA1D', 'SLC8A1', 'CACNA1C', 'CACNA2D2', 'ITGB6', 'SGCD', 'ITGA8', 'LAMA2', 'TGFB2', 'ITGB8', 'TTN', 'ITGA6', 'ITGA2', 'ITGA1', 'CACNG4', 'DES', 'IL6']	['CACNB2:+', 'CACNB4:+', 'ITGA9:-', 'IGF1:-', 'RYR2:-', 'CACNG6:-', 'TPM1:-', 'ITGA11:-', 'DMD:-', 'CACNA2D3:+', 'CACNA1D:+', 'SLC8A1:+', 'CACNA1C:-', 'CACNA2D2:+', 'ITGB6:-', 'SGCD:-', 'ITGA8:+', 'LAMA2:-', 'TGFB2:+', 'ITGB8:-', 'TTN:+', 'ITGA6:-', 'ITGA2:-', 'ITGA1:+', 'CACNG4:-', 'DES:-', 'IL6:-']
147	WP_OREXIN_RECEPTOR_PATHWAY	0.322021	0.00955649	['NR4A3', 'HMGA2', 'DIO2', 'OSBPL3', 'SLC1A2', 'RRM2', 'SELE', 'TNC', 'TOX', 'ICAM1', 'KCNK3', 'CCN2', 'LDLR', 'NOX4', 'PAPPA', 'GRIN2B', 'GRIN2A', 'VCAM1', 'IL6', 'CD24', 'FOSB', 'PPARG', 'DCLK1', 'SPP1', 'GRIA1', 'CXCL2', 'CXCL8', 'HAGHL', 'HOMER1', 'PRDM16', 'RUNX2', 'RUNX1', 'RUNX1T1', 'LAMA2']	['NR4A3:-', 'HMGA2:-', 'DIO2:-', 'OSBPL3:-', 'SLC1A2:-', 'RRM2:+', 'SELE:-', 'TNC:-', 'TOX:+', 'ICAM1:-', 'KCNK3:+', 'CCN2:-', 'LDLR:-', 'NOX4:-', 'PAPPA:-', 'GRIN2B:+', 'GRIN2A:-', 'VCAM1:-', 'IL6:-', 'CD24:-', 'FOSB:-', 'PPARG:+', 'DCLK1:-', 'SPP1:-', 'GRIA1:+', 'CXCL2:-', 'CXCL8:-', 'HAGHL:-', 'HOMER1:-', 'PRDM16:-', 'RUNX2:-', 'RUNX1:-', 'RUNX1T1:+', 'LAMA2:-']
148	REACTOME_SEMA4D_IN_SEMAPHORIN_SIGNALING	0.321416	0.00996427	['MYH14', 'MET', 'MYH10', 'MYH11', 'RND1']	['MYH14:-', 'MET:-', 'MYH10:+', 'MYH11:-', 'RND1:+']
149	KEGG_ARRHYTHMOGENIC_RIGHT_VENTRICULAR_CARDIOMYOPATHY_ARVC	0.321002	0.0102803	['CACNB2', 'CACNB4', 'ITGA9', 'RYR2', 'CACNG6', 'LEF1', 'ITGA11', 'DMD', 'CACNA2D3', 'CACNA1D', 'SLC8A1', 'CACNA1C', 'CACNA2D2', 'ITGB6', 'CDH2', 'SGCD', 'ITGA8', 'LAMA2', 'ITGB8', 'ITGA6', 'ITGA2', 'ITGA1', 'CACNG4', 'TCF7L1', 'DES', 'CTNNA3']	['CACNB2:+', 'CACNB4:+', 'ITGA9:-', 'RYR2:-', 'CACNG6:-', 'LEF1:-', 'ITGA11:-', 'DMD:-', 'CACNA2D3:+', 'CACNA1D:+', 'SLC8A1:+', 'CACNA1C:-', 'CACNA2D2:+', 'ITGB6:-', 'CDH2:-', 'SGCD:-', 'ITGA8:+', 'LAMA2:-', 'ITGB8:-', 'ITGA6:-', 'ITGA2:-', 'ITGA1:+', 'CACNG4:-', 'TCF7L1:-', 'DES:-', 'CTNNA3:-']
150	WP_ARRHYTHMOGENIC_RIGHT_VENTRICULAR_CARDIOMYOPATHY	0.321002	0.0103689	['ITGA9', 'CACNG6', 'TCF7L1', 'SLC8A1', 'ITGA11', 'ITGB6', 'SGCD', 'CTNNA3', 'LEF1', 'CACNG4', 'CDH2', 'DMD', 'CACNA1C', 'DES', 'CACNA1D', 'ITGB8', 'ITGA6', 'RYR2', 'CACNA2D2', 'ITGA1', 'ITGA2', 'CACNB2', 'CACNB4', 'CACNA2D3', 'LAMA2', 'ITGA8']	['ITGA9:-', 'CACNG6:-', 'TCF7L1:-', 'SLC8A1:+', 'ITGA11:-', 'ITGB6:-', 'SGCD:-', 'CTNNA3:-', 'LEF1:-', 'CACNG4:-', 'CDH2:-', 'DMD:-', 'CACNA1C:-', 'DES:-', 'CACNA1D:+', 'ITGB8:-', 'ITGA6:-', 'RYR2:-', 'CACNA2D2:+', 'ITGA1:+', 'ITGA2:-', 'CACNB2:+', 'CACNB4:+', 'CACNA2D3:+', 'LAMA2:-', 'ITGA8:+']
151	KEGG_ALZHEIMERS_DISEASE	0.320788	0.0105829	['BACE2', 'ITPR3', 'APOE', 'ERN1', 'PLCB1', 'RYR3', 'GRIN2A', 'GRIN2B', 'CACNA1D', 'CACNA1C', 'NOS1', 'SNCA']	['BACE2:-', 'ITPR3:+', 'APOE:-', 'ERN1:-', 'PLCB1:-', 'RYR3:-', 'GRIN2A:-', 'GRIN2B:+', 'CACNA1D:+', 'CACNA1C:-', 'NOS1:+', 'SNCA:+']
152	WP_MONOAMINE_GPCRS	0.319383	0.0115265	['HTR1F', 'CHRM3', 'CHRM2', 'HRH1', 'ADRA1A']	['HTR1F:-', 'CHRM3:+', 'CHRM2:+', 'HRH1:-', 'ADRA1A:+']
153	REACTOME_AMINE_LIGAND_BINDING_RECEPTORS	0.319383	0.0116285	['ADRA1A', 'CHRM3', 'HTR1F', 'CHRM2', 'HRH1']	['ADRA1A:+', 'CHRM3:+', 'HTR1F:-', 'CHRM2:+', 'HRH1:-']
154	WP_FRAGILE_X_SYNDROME	0.319057	0.0119416	['DEPTOR', 'KCND2', 'GABRB2', 'EPHA4', 'GRIP1', 'CAMK2B', 'NTRK2', 'MAP1B', 'GRIN2B', 'GRIN2A', 'GRM5', 'GRIA1', 'HOMER1', 'PLCB1', 'SH3GL3', 'BDNF', 'MMP9']	['DEPTOR:-', 'KCND2:-', 'GABRB2:-', 'EPHA4:-', 'GRIP1:-', 'CAMK2B:-', 'NTRK2:+', 'MAP1B:-', 'GRIN2B:+', 'GRIN2A:-', 'GRM5:-', 'GRIA1:+', 'HOMER1:-', 'PLCB1:-', 'SH3GL3:+', 'BDNF:+', 'MMP9:-']
155	PID_P53_DOWNSTREAM_PATHWAY	0.318078	0.0127049	['IGFBP3', 'TP63', 'VCAN', 'MDM2', 'MET', 'CAV1', 'CX3CL1', 'SERPINE1', 'NDRG1', 'GDF15', 'SPP1', 'LIF', 'EGFR', 'SFN', 'S100A2', 'BCL2L1', 'EDN2']	['IGFBP3:-', 'TP63:-', 'VCAN:-', 'MDM2:-', 'MET:-', 'CAV1:-', 'CX3CL1:-', 'SERPINE1:-', 'NDRG1:-', 'GDF15:-', 'SPP1:-', 'LIF:-', 'EGFR:+', 'SFN:-', 'S100A2:-', 'BCL2L1:-', 'EDN2:-']
156	WP_ENDOTHELIN_PATHWAYS	0.3178	0.0130137	['CNN1', 'EDNRB', 'PLCB1', 'ADRA1A', 'EDN1', 'CALCRL', 'MYLK']	['CNN1:-', 'EDNRB:+', 'PLCB1:-', 'ADRA1A:+', 'EDN1:-', 'CALCRL:+', 'MYLK:+']
157	KEGG_DILATED_CARDIOMYOPATHY	0.316826	0.0138385	['CACNB2', 'ADCY8', 'CACNB4', 'ADCY5', 'ITGA9', 'IGF1', 'RYR2', 'CACNG6', 'TPM1', 'ITGA11', 'DMD', 'CACNA2D3', 'CACNA1D', 'SLC8A1', 'CACNA1C', 'CACNA2D2', 'ITGB6', 'SGCD', 'ITGA8', 'LAMA2', 'TGFB2', 'ADCY2', 'ITGB8', 'TTN', 'ITGA6', 'ITGA2', 'ITGA1', 'CACNG4', 'DES']	['CACNB2:+', 'ADCY8:+', 'CACNB4:+', 'ADCY5:-', 'ITGA9:-', 'IGF1:-', 'RYR2:-', 'CACNG6:-', 'TPM1:-', 'ITGA11:-', 'DMD:-', 'CACNA2D3:+', 'CACNA1D:+', 'SLC8A1:+', 'CACNA1C:-', 'CACNA2D2:+', 'ITGB6:-', 'SGCD:-', 'ITGA8:+', 'LAMA2:-', 'TGFB2:+', 'ADCY2:-', 'ITGB8:-', 'TTN:+', 'ITGA6:-', 'ITGA2:-', 'ITGA1:+', 'CACNG4:-', 'DES:-']
158	KEGG_PPAR_SIGNALING_PATHWAY	0.316313	0.0143545	['SORBS1', 'ACADL', 'CD36', 'SCD', 'ME1', 'MMP1', 'GK', 'ANGPTL4', 'SLC27A2', 'FABP4', 'FABP6', 'PPARG', 'SCD5', 'ACSL4']	['SORBS1:+', 'ACADL:+', 'CD36:+', 'SCD:+', 'ME1:-', 'MMP1:-', 'GK:-', 'ANGPTL4:-', 'SLC27A2:-', 'FABP4:-', 'FABP6:-', 'PPARG:+', 'SCD5:-', 'ACSL4:-']
159	REACTOME_RHO_GTPASES_ACTIVATE_CIT	0.314695	0.0157895	['MYH14', 'CIT', 'MYH10', 'MYH11']	['MYH14:-', 'CIT:-', 'MYH10:+', 'MYH11:-']
160	WP_CIRCADIAN_RHYTHM_GENES	0.314632	0.0159916	['NLGN1', 'KCND2', 'PPARGC1A', 'HNF1B', 'NPAS2', 'KCNMA1', 'SERPINE1', 'MAPK10', 'LGR4', 'PROX1', 'IL6', 'BTBD9', 'TOP2A', 'KCNH7', 'HOMER1', 'TPH1', 'AHR', 'ARNTL2', 'SLC6A4', 'RORB', 'ARNT2', 'NTRK3', 'SFTPC', 'PPARG', 'HS3ST2']	['NLGN1:-', 'KCND2:-', 'PPARGC1A:+', 'HNF1B:-', 'NPAS2:-', 'KCNMA1:-', 'SERPINE1:-', 'MAPK10:-', 'LGR4:-', 'PROX1:-', 'IL6:-', 'BTBD9:+', 'TOP2A:+', 'KCNH7:-', 'HOMER1:-', 'TPH1:-', 'AHR:-', 'ARNTL2:-', 'SLC6A4:+', 'RORB:-', 'ARNT2:+', 'NTRK3:-', 'SFTPC:+', 'PPARG:+', 'HS3ST2:-']
161	REACTOME_CLATHRIN_MEDIATED_ENDOCYTOSIS	0.313799	0.0168676	['CFTR', 'SYT1', 'AMPH', 'LRP2', 'GRK3', 'PACSIN2', 'SH3GL2', 'AREG', 'TACR1', 'SGIP1', 'EREG', 'LDLR', 'KIAA0319', 'EGF', 'STON2', 'SH3GL3', 'EGFR', 'REPS2', 'BTC', 'CHRM2', 'EPGN']	['CFTR:+', 'SYT1:-', 'AMPH:-', 'LRP2:+', 'GRK3:-', 'PACSIN2:-', 'SH3GL2:+', 'AREG:-', 'TACR1:-', 'SGIP1:+', 'EREG:-', 'LDLR:-', 'KIAA0319:-', 'EGF:-', 'STON2:-', 'SH3GL3:+', 'EGFR:+', 'REPS2:-', 'BTC:-', 'CHRM2:+', 'EPGN:-']
162	REACTOME_CARGO_RECOGNITION_FOR_CLATHRIN_MEDIATED_ENDOCYTOSIS	0.313634	0.0171788	['CFTR', 'SYT1', 'LRP2', 'GRK3', 'SH3GL2', 'AREG', 'TACR1', 'SGIP1', 'EREG', 'LDLR', 'KIAA0319', 'EGF', 'STON2', 'SH3GL3', 'EGFR', 'REPS2', 'BTC', 'CHRM2', 'EPGN']	['CFTR:+', 'SYT1:-', 'LRP2:+', 'GRK3:-', 'SH3GL2:+', 'AREG:-', 'TACR1:-', 'SGIP1:+', 'EREG:-', 'LDLR:-', 'KIAA0319:-', 'EGF:-', 'STON2:-', 'SH3GL3:+', 'EGFR:+', 'REPS2:-', 'BTC:-', 'CHRM2:+', 'EPGN:-']
163	WP_TGFBETA_SIGNALING_PATHWAY	0.313559	0.0174137	['NEDD4L', 'YAP1', 'THBS1', 'TNC', 'NEDD9', 'MET', 'SMAD3', 'ITGA2', 'FN1', 'MAPK4', 'SMURF1', 'FOSB', 'COL1A2', 'CAV1', 'RUNX2', 'MMP1']	['NEDD4L:+', 'YAP1:+', 'THBS1:-', 'TNC:-', 'NEDD9:-', 'MET:-', 'SMAD3:-', 'ITGA2:-', 'FN1:-', 'MAPK4:+', 'SMURF1:-', 'FOSB:-', 'COL1A2:-', 'CAV1:-', 'RUNX2:-', 'MMP1:-']
164	REACTOME_CROSSLINKING_OF_COLLAGEN_FIBRILS	0.313508	0.0176311	['TLL1', 'COL4A4', 'COL1A1', 'COL4A2', 'LOXL4', 'COL1A2', 'BMP1', 'COL4A3', 'COL4A1', 'COL4A6']	['TLL1:+', 'COL4A4:+', 'COL1A1:-', 'COL4A2:-', 'LOXL4:-', 'COL1A2:-', 'BMP1:-', 'COL4A3:+', 'COL4A1:-', 'COL4A6:-']
165	REACTOME_DEFECTIVE_EXT2_CAUSES_EXOSTOSES_2	0.312392	0.0188764	['GPC4', 'SDC4', 'GPC3', 'GPC5', 'EXT1', 'GPC6']	['GPC4:-', 'SDC4:-', 'GPC3:+', 'GPC5:-', 'EXT1:+', 'GPC6:-']
166	PID_THROMBIN_PAR1_PATHWAY	0.312311	0.0191451	['GRK3', 'PLCB1', 'GNA14', 'PRKCB', 'AKAP13', 'TRPC6']	['GRK3:-', 'PLCB1:-', 'GNA14:+', 'PRKCB:-', 'AKAP13:+', 'TRPC6:+']
167	REACTOME_RHO_GTPASES_ACTIVATE_ROCKS	0.3122	0.0194507	['MYH14', 'MYH10', 'MYH11']	['MYH14:-', 'MYH10:+', 'MYH11:-']
168	PID_P73PATHWAY	0.311541	0.0203336	['WT1', 'PLPP1', 'YAP1', 'GDF15', 'MDM2', 'S100A2', 'SERPINE1', 'CLCA2', 'SFN', 'NEDD4L', 'TP63', 'SERPINA1', 'CCNE2']	['WT1:-', 'PLPP1:-', 'YAP1:+', 'GDF15:-', 'MDM2:-', 'S100A2:-', 'SERPINE1:-', 'CLCA2:-', 'SFN:-', 'NEDD4L:+', 'TP63:-', 'SERPINA1:-', 'CCNE2:-']
169	WP_CLEAR_CELL_RENAL_CELL_CARCINOMA_PATHWAYS	0.311103	0.0210144	['DEPTOR', 'TGFB2', 'CDH13', 'PFKP', 'KSR1', 'PLOD2', 'PGBD5', 'ME1', 'ENPP3', 'FLT1', 'PGM1', 'SDS', 'ACACA', 'EGFR', 'RAPGEF5', 'KDR', 'SQSTM1']	['DEPTOR:-', 'TGFB2:+', 'CDH13:+', 'PFKP:-', 'KSR1:-', 'PLOD2:-', 'PGBD5:-', 'ME1:-', 'ENPP3:-', 'FLT1:+', 'PGM1:-', 'SDS:-', 'ACACA:+', 'EGFR:+', 'RAPGEF5:+', 'KDR:+', 'SQSTM1:+']
170	REACTOME_ONCOGENIC_MAPK_SIGNALING	0.310494	0.021911	['CAMK2B', 'VWF', 'DUSP16', 'FN1', 'DUSP6', 'KSR1', 'DUSP10', 'CNKSR2', 'FGG', 'FGA', 'SPRED2']	['CAMK2B:-', 'VWF:+', 'DUSP16:-', 'FN1:-', 'DUSP6:+', 'KSR1:-', 'DUSP10:-', 'CNKSR2:-', 'FGG:+', 'FGA:-', 'SPRED2:+']
171	REACTOME_SEMA4D_INDUCED_CELL_MIGRATION_AND_GROWTH_CONE_COLLAPSE	0.308766	0.0241919	['MYH14', 'MYH10', 'MYH11', 'RND1']	['MYH14:-', 'MYH10:+', 'MYH11:-', 'RND1:+']
172	REACTOME_OPIOID_SIGNALLING	0.307143	0.0265456	['CAMK2B', 'ADCY2', 'ITPR3', 'PDE4D', 'PDE1A', 'GNGT1', 'PDE1C', 'ADCY8', 'GNA14', 'NBEA', 'ADCY5', 'PLCB1']	['CAMK2B:-', 'ADCY2:-', 'ITPR3:+', 'PDE4D:+', 'PDE1A:-', 'GNGT1:-', 'PDE1C:+', 'ADCY8:+', 'GNA14:+', 'NBEA:-', 'ADCY5:-', 'PLCB1:-']
173	REACTOME_PHASE_2_PLATEAU_PHASE	0.307044	0.0269652	['CACNA2D2', 'CACNG4', 'CACNG6', 'CACNA1C', 'KCNE4', 'CACNB2', 'KCNE1']	['CACNA2D2:+', 'CACNG4:-', 'CACNG6:-', 'CACNA1C:-', 'KCNE4:-', 'CACNB2:+', 'KCNE1:-']
174	REACTOME_GPVI_MEDIATED_ACTIVATION_CASCADE	0.306373	0.0281944	['PRKCZ', 'COL1A1', 'COL1A2', 'LYN']	['PRKCZ:+', 'COL1A1:-', 'COL1A2:-', 'LYN:-']
175	WP_COMPLEMENT_SYSTEM_IN_NEURONAL_DEVELOPMENT_AND_PLASTICITY	0.305355	0.0299939	['TGFB2', 'LLGL2', 'ATP10A', 'CLU', 'CX3CL1', 'SUSD4', 'FCN3', 'MFGE8', 'CSMD1', 'CR2', 'C3', 'PRKCZ', 'ATP11A', 'C4BPA', 'C4BPB', 'C5', 'C6', 'C7', 'COLEC12', 'C9', 'PATJ', 'CD55']	['TGFB2:+', 'LLGL2:+', 'ATP10A:-', 'CLU:-', 'CX3CL1:-', 'SUSD4:-', 'FCN3:+', 'MFGE8:-', 'CSMD1:-', 'CR2:-', 'C3:-', 'PRKCZ:+', 'ATP11A:+', 'C4BPA:+', 'C4BPB:-', 'C5:+', 'C6:-', 'C7:+', 'COLEC12:+', 'C9:+', 'PATJ:+', 'CD55:+']
176	WP_RAS_AND_BRADYKININ_PATHWAYS_IN_COVID19	0.304433	0.0317497	['NOS1', 'PRKG1', 'SERPINE1', 'CYP24A1', 'ACE2', 'AGTR2']	['NOS1:+', 'PRKG1:+', 'SERPINE1:-', 'CYP24A1:-', 'ACE2:-', 'AGTR2:-']
177	REACTOME_SCAVENGING_BY_CLASS_A_RECEPTORS	0.30292	0.0345949	['FTL', 'COL1A1', 'APOE', 'COL4A2', 'COLEC12', 'SCGB3A2', 'COL1A2', 'COL3A1', 'COL4A1']	['FTL:-', 'COL1A1:-', 'APOE:-', 'COL4A2:-', 'COLEC12:+', 'SCGB3A2:-', 'COL1A2:-', 'COL3A1:-', 'COL4A1:-']
178	REACTOME_RHO_GTPASES_ACTIVATE_PKNS	0.302325	0.0360228	['MYH14', 'MYH10', 'MYH11', 'SFN']	['MYH14:-', 'MYH10:+', 'MYH11:-', 'SFN:-']
179	WP_PPAR_SIGNALING_PATHWAY	0.299139	0.042511	['ANGPTL4', 'SORBS1', 'PPARG', 'SCD', 'ME1', 'FABP6', 'FABP4', 'SLC27A2', 'ACADL', 'ACSL4', 'MMP1', 'CD36']	['ANGPTL4:-', 'SORBS1:+', 'PPARG:+', 'SCD:+', 'ME1:-', 'FABP6:-', 'FABP4:-', 'SLC27A2:-', 'ACADL:+', 'ACSL4:-', 'MMP1:-', 'CD36:+']
180	REACTOME_CREB1_PHOSPHORYLATION_THROUGH_NMDA_RECEPTOR_MEDIATED_ACTIVATION_OF_RAS_SIGNALING,REACTOME_RAS_ACTIVATION_UPON_CA2_INFLUX_THROUGH_NMDA_RECEPTOR	0.296126	0.0496109	['RASGRF1', 'CAMK2B', 'RASGRF2', 'DLG2', 'GRIN2B']	['RASGRF1:+', 'CAMK2B:-', 'RASGRF2:-', 'DLG2:-', 'GRIN2B:+']
436
437
438
439
440
441
442
443
444
445
446
447
448
449
450
451
452
453
454
455
456
457
458
459
460
461
462
463
464
465
466
467
468
469
470
471
472
473
474
475
476
477
478
479
480
481
482
483
484
485
486
487
488
489
490
491
492
493
494
495
496
497
498
499
500
501
502
503
504
505
506
507
508
509
510
511
512
513
514
515
516
517
518
519
520
521
522
523
524
525
526
527
528
529
530
531
532
533
534
535
536
537
538
539
540
541
542
543
544
545
546
547
548
549
550
551
552
553
554
555
556
557
558
559
560
561
562
563
564
565
566
567
568
569
570
571
572
573
574
575
576
577
578
579
580
581
582
583
584
585
586
587
588
589
590
591
592
593
594
595
596
597
598
599
600
601
602
603
604
605
606
607
608
609
610
611
612
613
614
615
616
617
618
619
620
621
622
623
624
625
626
627
628
629
630
631
632
633
634
635
636
637
638
639
640
641
642
643
644
645
646
647
648
649
650
651
652
653
654
655
656
657
658
659
660
661
662
663
664
665
666
667
668
669
670
671
672
673
674
675
676
677
678
679
680
681
682
683
684
685
686
687
688
689
690
691
692
693
694
695
696
697
698
699
700
701
702
703
704
705
706
707
708
709
710
711
712
713
714
715
716
717
718
719
720
721
722
723
724
725
726
727
728
729
730
731
732
733
734
735
736
737
738
739
740
741
742
743
744
745
746
747
748
749
750
751
752
753
754
755
756
757
758
759
760
761
762
763
764
765
766
767
768
769
770
771
772
773
774
775
776
777
778
779
780
781
782
783
784
785
786
787
788
789
790
791
792
793
794
795
796
797
798
799
800
801
802
803
804
805
806
807
808
809
810
811
812
813
814
815
816
817
818
819
820
821
822
823
824
825
826
827
828
829
830
831
832
833
834
835
836
837
838
839
840
841
842
843
844
845
846
847
848
849
850
851
852
853
854
855
856
857
858
859
860
861
862
863
864
865
866
867
868
869
870
871
872
873
874
875
876
877
878
879
880
881
882
883
884
885
886
887
888
889
890
891
892
893
894
895
896
897
898
899
900
901
902
903
904
905
906
907
908
909
910
911
912
913
914
915
916
917
918
919
920
921
922
923
924
925
926
927
928
929
930
931
932
933
934
935
936
937
938
939
940
941
942
943
944
945
946
947
948
949
950
951
952
953
954
955
956
957
958
959
960
961
962
963
964
965
966
967
968
969
970
971
972
973
974
975
976
977
978
979
980
981
982
983
984
985
986
987
988
989
990
991
992
993
994
995
996
997
998
999
1000
1001
1002
1003
1004
1005
1006
1007
1008
1009
1010
1011
1012
1013
1014
1015
1016
1017
1018
1019
1020
1021
1022
1023
1024
1025
1026
1027
1028
1029
1030
1031
1032
1033
1034
1035
1036
1037
1038
1039
1040
1041
1042
1043
1044
1045
1046
1047
1048
1049
1050
1051
1052
1053
1054
1055
1056
1057
1058
1059
1060
1061
1062
1063
1064
