# Supplementary material for: Unagi: Deep Generative Model for Deciphering Cellular Dynamics and In-Silico Drug Discovery in Complex Diseases
Source: Research Square preprint supplement (doi:10.21203/rs.3.rs-3676579/v1), 2023-12-18
Supplement: Supplementary file 4 [file a0f467455841798c251620e4.xlsx]

## Sheet: IPF_complete_analysis
Thirty tissue blocks from donors with Idiopathic Pulmonary Fibrosis (IPF) and ten from control donors were utilized. Protein expressions, indicated by Label-Free Quantification (LFQ) intensities, were assessed for each individual sample. These LFQ intensities were log2 transformed and z-score normalized. Both ANOVA and Student’s T-test were conducted to identify proteins differentially expressed …
	Autosearch using the cell T5 you can find all the protein associated with a given term	Log2(normalized intensities)																																								Mean		SD		Linear trends		ANOVA and HCLUST
	Surface density	0.0016659	0.00210495	0.00254908	0.00376391	0.00377771	0.0044172	0.00478993	0.00491556	0.00494141	0.00546575	0.00567859	0.00642333	0.00707297	0.00768041	0.00790465	0.00815977	0.00838913	0.00852633	0.0087361	0.00898173	0.00900006	0.00906611	0.00932907	0.0101637	0.0102307	0.0102722	0.0103449	0.0118754	0.0127245	0.012935	0.0152118	0.0150497	0.0147205	0.0143738	0.0138905	0.0138562	0.0136282	0.0131036	0.0128797	0.0119045
	Stages	stage3	stage3	stage3	stage3	stage3	stage3	stage3	stage3	stage3	stage3	stage3	stage3	stage2	stage2	stage2	stage2	stage2	stage2	stage2	stage2	stage2	stage2	stage2	stage 1	stage 1	stage 1	stage 1	stage 1	stage 1	stage 1	Control	Control	Control	Control	Control	Control	Control	Control	Control	Control
	percent_tissue	6.81844	53.4295	55.656	56.5979	14.6578	35.6368	36.6408	46.6687	51.0488	41.6417	36.9431	41.4676	48.0561	52.8744	25.3134	39.6612	36.0409	44.8209	32.2779	45.4946	26.4127	44.8498	41.0694	42.3601	55.9533	42.1455	39.6088	43.9264	42.2158	47.2856	51.7465	52.3519	49.5212	52.0069	56.2027	62.2483	54.6002	60.4743	63.0785	59.1624
	disease_status	IPF	IPF	IPF	IPF	IPF	IPF	IPF	IPF	IPF	IPF	IPF	IPF	IPF	IPF	IPF	IPF	IPF	IPF	IPF	IPF	IPF	IPF	IPF	IPF	IPF	IPF	IPF	IPF	IPF	IPF	Control	DONOR	DONOR	DONOR	DONOR	DONOR	DONOR	DONOR	DONOR	DONOR
Gene_Name	movement	p268_3	p224_48	p120_21	p224_84	p268_76	p319_6	p319_49	p323_37	p323_42	p204_75	p323_71	p120_101	p127_13	p127_26	p325_61	p120_107	p127_10	p190_28	p253_117	p268_70	p253_86	p224_41	p190_59	p204_26	p204_48	p190_56	p325_36	p319_42	p325_70	p253_72	p274_87	p221_35	p249_117	p248_95	p62_27	p302_16	p94_124	p222_66	p304_71	p145_94	DONOR_mean	IPF_mean	DONOR_sd	IPF_sd	linear_p	best_fitted_trend	ANOVA_p	ANOVA_padj
IFIT3	-	-5.99984	-3.41344	-3.15645	-5.95127	-6.96278	-3.49231	-4.26014	-4.59953	-5.11535	-5.12827	-4.55619	-2.84999	-4.25523	-3.26781	-4.34319	-6.07722	-2.55058	-5.99554	-5.16174	-5.62941	-3.33735	-3.91778	-3.66125	-4.20256	-5.16398	-4.37063	-5.25403	-1.83684	-5.03414	-3.6686	-2.1969	-2.17814	-3.58593	-2.37037	-2.92407	-2.66961	-4.02538	-2.36425	-5.99845	0.122485	-2.81906	-4.44045	1.56503	1.19338	0.0047997	linear_increasing	0.00143052	0.0036955
LIMS2	-	-4.85954	-6.40312	-6.25505	-4.88251	-6.4662	-5.35488	-3.77097	-5.12073	-5.95794	-5.87025	-4.01012	-4.83195	-3.73488	-4.09037	-6.04188	-3.73059	-4.52068	-5.06586	-5.80437	-4.74528	-3.16964	-3.78724	-2.86146	-2.40801	-3.71027	-4.36235	-4.52109	-3.60848	-3.45509	-5.12871	-2.0734	-2.44982	-3.10717	-1.3949	-1.03289	-1.66818	-2.95982	-2.32436	-0.643258	-1.81475	-1.94685	-4.61765	0.797103	1.09068	7.06106e-09	linear_increasing	1.74744e-08	2.04791e-07
CD93	-	-4.39958	-5.79952	-2.60331	-3.19308	-6.36678	-4.67036	-4.68017	-5.48555	-2.97875	-4.65441	-3.35381	-5.74926	-4.02668	-6.24961	-3.9209	-3.41824	-5.79423	-2.54106	-4.40958	-5.65575	-4.31402	-5.16998	-4.15365	-4.30109	-5.81321	-4.77032	-4.3957	-3.82425	-3.68869	-3.23378	-0.103207	-0.603578	-1.01655	-0.125659	-0.516592	0.00663698	-0.583117	-0.129828	0.0423882	0.637152	-0.239235	-4.45384	0.457449	1.07459	3.30446e-06	linear_increasing	1.86967e-14	1.9964e-12
SEPTIN8	-	-4.24054	-4.72242	-4.45708	-3.41772	-6.03553	-3.51669	-5.16213	-3.04408	-3.78569	-5.40681	-4.34601	-2.85135	-4.19317	-5.84667	-4.5221	-3.74102	-3.37762	-6.10663	-2.29439	-5.96938	-5.07043	-2.89018	-5.43399	-4.39083	-4.71204	-6.07719	-4.30606	-4.61103	-5.00377	-3.10718	-2.46775	-1.39427	-1.62165	-3.49077	-0.930285	-1.33752	-5.53333	-1.31037	-1.16706	-1.06193	-2.03149	-4.42132	1.45519	1.06654	0.00333256	linear_increasing	2.06304e-06	1.33507e-05
CFHR1	-	-2.73727	-4.44085	-5.56474	-6.47672	-6.44254	-4.72828	-3.71672	-4.17063	-3.78197	-3.74436	-2.96186	-3.94827	-4.84047	-7.6827	-3.8593	-3.23156	-4.58518	-2.83253	-4.61559	-5.38676	-5.86224	-4.18417	-4.3686	-5.97889	-2.37024	-3.86078	-5.45163	-4.13441	-5.17741	-4.83693	-1.57435	-7.25278	0.139154	-1.98009	-1.1234	-4.35964	-1.19111	-1.84565	-1.11026	-5.67761	-2.59757	-4.53245	2.3596	1.21759	0.0291245	linear_increasing	0.00166349	0.00422356
	-	-4.70879	-4.8804	-2.88841	-4.60165	-6.3493	-6.47414	-3.82393	-4.79056	-4.70232	-5.29724	-4.74618	-4.93463	-4.46686	-7.08938	-3.20414	-3.72761	-5.91969	-5.31428	-4.9096	-3.54187	-4.0939	-3.25976	-3.61341	-7.30748	-6.0655	-3.69345	-5.74909	-5.07422	-6.11955	-5.59396	-1.03258	-1.72018	-1.15155	-1.12658	-1.05217	-1.36726	-6.38872	-1.0545	-1.13602	-1.11848	-1.7148	-4.89804	1.65532	1.15603	0.00183214	linear_increasing	5.39873e-08	5.60884e-07
LSS	-	-4.90581	-4.93847	-6.07246	-2.83901	-5.69984	-4.20578	-4.75627	-3.74167	-5.37907	-3.85458	-1.71873	-5.81134	-4.78438	-4.63801	-2.29115	-3.49021	-4.26706	-2.4652	-2.91392	-6.18538	-3.77054	-5.53623	-4.50471	-4.74897	-5.70537	-4.86343	-4.47977	-4.92623	-2.63507	-2.85227	-1.23408	-1.28823	-1.63937	-1.26497	-5.43054	-1.37172	-5.86548	-1.78648	-4.86062	-1.68588	-2.64274	-4.29936	1.91674	1.20873	0.00384534	linear_increasing	0.00262596	0.0061625
CLDN18	-	-5.19491	-3.58458	-5.79607	-3.64869	-6.05888	-5.05714	-5.54542	-5.55249	-6.08153	-3.58783	-4.20542	-6.24358	-5.84531	-5.59184	-3.50916	-3.822	-4.73888	-3.54434	-5.09336	-6.34195	-2.34779	-3.47922	-3.50613	-5.30593	-4.57548	-4.88722	-5.79058	-4.36458	-4.34443	-4.32664	-0.623078	-1.18075	-0.960774	-5.85788	-1.15174	-4.36249	-4.47807	-0.132425	-1.27642	-0.786121	-2.08097	-4.73238	2.01084	1.04832	0.00032728	linear_increasing	3.57952e-06	2.18407e-05
CSNK2A2	-	-4.23258	-3.23219	-4.1264	-4.28437	-5.32099	-3.38554	-2.92872	-2.21111	-4.73997	-3.48446	-4.0706	-5.1215	-5.57025	-5.2351	-5.56811	-6.88388	-5.14598	-4.87	-4.03632	-5.17868	-5.31292	-3.88508	-4.77986	-4.15218	-4.28025	-3.58944	-3.93365	-4.86729	-3.89608	-5.71383	-2.25937	-2.22107	-2.36075	-2.14656	-5.38924	-2.174	-4.11856	-2.19138	-2.40139	-2.16717	-2.74295	-4.46791	1.1045	0.969648	0.0575088	other_trend	3.28269e-05	0.000144378
NUDT5	-	-3.58292	-3.93417	-6.76997	-5.80209	-5.88325	-1.97311	-4.59098	-5.66881	-4.63321	-5.41154	-3.9093	-6.55066	-5.81733	-4.42957	-7.78182	-3.63391	-4.3661	-5.42692	-4.03362	-5.85612	-5.65357	-3.26401	-5.57316	-6.12128	-5.01245	-4.88861	-4.97683	-3.16433	-4.82401	-2.96315	-1.89906	-2.846	-1.26615	-1.06688	-1.19438	-2.78088	-1.89281	-2.26209	-1.5042	-1.01707	-1.77295	-4.88323	0.680735	1.26497	6.66525e-05	linear_increasing	7.49388e-09	1.0288e-07
TACSTD2	-	-5.38816	-4.45905	-4.50383	-5.07362	-5.52391	-3.91037	-5.39238	-3.78731	-6.9029	-5.13874	-4.02422	-6.26813	-4.88234	-4.26955	-4.08603	-4.15905	-5.27421	-4.91045	-4.16912	-3.92947	-5.60608	-2.21233	-3.82715	-4.67094	-3.38815	-2.74179	-4.32144	-3.49743	-5.88508	-6.83106	-0.754279	-1.15944	-0.0578776	-0.0775422	-0.596511	0.379646	-1.21664	-0.281341	-1.07295	0.554443	-0.428249	-4.63448	0.633033	1.08528	1.63052e-06	linear_increasing	5.30076e-14	4.42959e-12
WFS1	-	-4.50019	-3.80582	-4.18488	-4.98644	-5.23872	-1.64475	-7.19958	-3.98052	-5.71861	-5.91239	-3.90639	-4.06141	-3.89788	-4.6264	-5.25606	-6.51109	-4.83661	-5.15361	-5.63775	-4.6619	-4.04294	-4.31379	-5.18233	-5.51515	-3.79792	-4.84912	-3.36769	-4.12105	-4.63078	-4.67847	-2.22857	-2.61928	-1.38384	-2.71882	-1.72928	-1.15969	-2.63502	-2.07944	-1.35666	-1.7216	-1.96322	-4.67401	0.577248	1.03182	0.00024454	linear_increasing	1.72594e-09	2.8597e-08
TRIOBP	-	-3.171	-4.79823	-4.54133	-4.97331	-5.16359	-5.40679	-6.07681	-3.53611	-6.09403	-3.68262	-3.75132	-3.09634	-6.47883	-5.48098	-3.18946	-3.69407	-2.96763	-3.83863	-6.3858	-5.42661	-4.27934	-5.64108	-3.15801	-2.85158	-3.60826	-4.20585	-4.13127	-5.49054	-1.73598	-4.54202	-2.84559	-6.99996	-3.30856	-2.64746	-2.65194	-2.59215	-4.13361	-2.88149	-2.85538	-2.52754	-3.34437	-4.37991	1.36983	1.20375	0.0342793	linear_increasing	0.0284558	0.0454252
MTARC2	-	-6.54627	-3.61916	-5.14943	-6.67165	-5.37433	-5.02195	-4.35139	-5.22819	-2.93752	-3.97794	-4.64438	-4.30344	-5.30956	-6.6187	-3.81975	-4.81434	-6.18672	-4.49829	-6.19383	-3.79032	-3.46027	-5.79114	-5.17339	-6.01745	-2.73196	-3.35605	-3.25487	-4.53337	-6.22202	-5.95302	-1.22993	0.0336683	-1.4151	-0.924931	-1.00086	-1.01608	-3.89157	-1.28689	-1.36047	-0.378001	-1.24702	-4.85169	1.03546	1.16328	2.92367e-05	linear_increasing	1.39851e-10	3.31844e-09
STXBP1	-	-6.30771	-6.37629	-4.36358	-5.45873	-5.00825	-5.10508	-3.76467	-5.59382	-4.64628	-4.03883	-3.74741	-4.90898	-7.28194	-3.62445	-3.90884	-5.52895	-2.56188	-7.96704	-3.22422	-5.6511	-3.91367	-3.96242	-3.31945	-4.2532	-2.83187	-4.30173	-4.93396	-5.35395	-5.0071	-5.40469	-1.79187	-2.36083	-1.77265	-1.35139	-1.97106	-1.58192	-5.81844	-1.98464	-1.6117	-1.19782	-2.14423	-4.745	1.33285	1.24292	0.000119924	linear_increasing	1.8242e-06	1.20901e-05
FOLR1	-	-3.99295	-4.29586	-3.82699	-5.15502	-4.58079	-5.68698	-3.14803	-5.5972	-4.63257	-4.79827	-5.19137	-2.93346	-4.75438	-4.49535	-4.39164	-4.23832	-5.07207	-5.17481	-6.72902	-5.68942	-5.97942	-3.78283	-3.58959	-2.15981	-3.04927	-4.5966	-3.93034	-6.7124	-4.71262	-2.46827	-1.24146	-0.640805	0.550387	0.126406	-1.45821	-1.76287	-1.75274	-0.730478	-2.01918	-0.144089	-0.907304	-4.51219	0.880428	1.12169	1.54702e-05	linear_increasing	3.00642e-11	8.62438e-10
GRN	-	-3.06613	-3.13612	-4.49037	-5.30851	-4.96057	-6.2386	-3.69407	-5.36708	-5.64315	-4.9414	-4.63785	-5.07961	-5.22573	-4.15132	-5.1023	-6.03124	-3.04098	-4.85398	-5.96893	-4.90428	-4.67187	-5.05034	-5.02269	-7.29408	-6.81897	-2.63051	-2.05698	-3.85288	-5.01946	-5.59295	-3.02075	-0.308691	-2.86626	-2.66125	-2.317	-3.32693	-2.88221	-2.89518	-4.2461	-1.66337	-2.61877	-4.7951	1.04671	1.19651	0.00835152	linear_increasing	8.95829e-06	4.80945e-05
SBSPON	-	-4.25538	-5.13162	-4.18547	-5.78104	-4.3815	-4.52164	-2.70996	-4.81113	-5.70514	-2.65164	-5.48678	-4.78267	-3.57175	-3.36047	-5.51254	-4.79919	-4.47626	-4.27781	-3.84301	-3.91808	-4.88058	-4.83819	-3.66923	-4.32764	-6.50695	-4.05982	-5.14407	-4.58347	-3.94348	-4.06898	-1.6731	-0.546438	-0.377444	0.226679	-0.34211	-1.19148	-3.64869	-0.486506	-5.58486	-0.386441	-1.40104	-4.47285	1.82845	0.863588	9.39419e-05	linear_increasing	1.27638e-08	1.54289e-07
CNRIP1	-	-4.38083	-5.73486	-3.72809	-4.51181	-5.0187	-4.03551	-5.94964	-4.20617	-4.6992	-4.33553	-2.4081	-3.14128	-5.46007	-4.98908	-6.5341	-5.87609	-5.6246	-3.65571	-5.70563	-4.4615	-4.8743	-6.97156	-4.38714	-3.45332	-6.98638	-6.39575	-4.00325	-5.26609	-4.1967	-5.00992	-3.92407	-3.67027	-3.42401	-3.73128	-4.67824	-2.65728	-4.43718	-4.01119	-5.05179	-3.92114	-3.95065	-4.8667	0.671708	1.11426	0.325722	other_trend	0.019317	0.0326014
LANCL1	-	-4.60974	-5.38298	-5.27465	-5.5411	-4.43872	-4.78135	-3.45332	-5.51074	-4.76845	-3.20711	-4.26812	-5.95176	-2.89736	-4.59033	-4.0442	-3.65016	-6.76659	-3.85724	-4.79254	-4.11067	-4.60464	-7.03632	-4.82095	-3.38436	-5.57748	-4.88792	-4.05066	-5.63318	-5.70845	-3.98904	-0.575875	-0.896469	-0.809327	-0.329407	-0.62766	-1.07317	-1.45362	-2.76486	-0.933661	-0.559171	-1.00232	-4.71967	0.694407	0.995468	1.34862e-05	linear_increasing	2.86026e-13	1.71399e-11
CLEC14A	-	-4.19268	-4.17905	-3.83886	-5.85647	-4.40083	-4.97402	-5.36887	-5.50855	-5.15553	-4.62722	-5.99903	-4.98605	-3.36256	-5.26671	-5.95453	-5.5746	-5.39529	-4.70499	-3.17105	-5.10352	-2.78838	-2.94958	-3.91749	-5.80607	-3.79435	-4.86498	-3.69404	-3.82827	-5.02118	-3.99349	-1.58007	-1.65813	-1.34828	-1.00786	-1.88165	-1.90027	-5.45369	-1.73647	-1.06516	-0.612077	-1.82437	-4.60927	1.34228	0.92507	2.39419e-05	linear_increasing	8.57841e-09	1.14916e-07
PTGDS	-	-3.58401	-4.07191	-5.48708	-3.89058	-4.68815	-5.53695	-4.82358	-5.50103	-4.9198	-3.85045	-5.95947	-4.59217	-5.02633	-2.75915	-6.41921	-3.4516	-4.45421	-4.87706	-5.07164	-4.81831	-5.34188	-6.25492	-5.69095	-6.22964	-4.59377	-5.22852	-6.49387	-3.61461	-6.22355	-6.5441	-0.750006	-4.82916	0.121354	-0.564782	-0.421942	-1.7947	-0.586054	-4.50353	-0.975683	-4.42552	-1.873	-4.99995	1.93497	1.00228	0.00465698	linear_increasing	7.12341e-08	7.16816e-07
COL4A4	-	-4.71464	-3.81225	-5.03922	-4.38618	-3.99432	-4.51661	-3.83718	-5.5861	-7.73344	-5.71953	-4.65736	-3.55712	-4.47118	-5.53447	-7.64928	-4.16162	-3.26538	-4.10728	-4.78679	-4.42436	-4.42906	-5.82575	-3.85799	-4.83819	-5.10402	-5.08963	-4.39571	-3.3692	-4.15417	-6.50606	1.10759	-0.219659	1.36768	1.15831	0.31698	0.901514	0.370273	0.785953	0.178371	1.30092	0.726793	-4.78414	0.537193	1.08972	2.38299e-06	linear_increasing	8.0871e-18	5.18113e-15
KANK3	-	-3.37804	-5.64672	-4.8304	-4.5057	-4.42228	-2.03795	-4.19343	-4.39143	-4.99049	-5.53178	-5.85754	-4.01539	-5.05258	-3.40582	-4.49123	-7.1932	-4.15985	-3.6324	-5.19603	-5.45136	-4.83827	-4.57819	-4.88036	-5.8464	-3.29944	-1.51041	-5.59812	-5.00253	-4.55586	-2.57807	-2.69521	-5.35918	-2.48731	-2.11277	-2.76119	-1.99347	-5.58104	-2.29032	-2.32213	-1.93499	-2.95376	-4.50237	1.35469	1.18708	0.0203692	linear_increasing	0.00138271	0.00359131
NIT1	-	-4.27935	-5.41678	-4.53518	-5.52291	-4.21924	-5.72782	-5.0227	-4.5156	-4.57247	-4.12443	-3.3878	-5.80716	-3.40859	-4.07583	-4.41014	-2.81027	-5.68718	-5.62375	-4.76334	-4.25647	-4.44698	-4.33578	-2.97103	-3.12578	-5.90445	-4.01301	-3.44424	-5.57488	-3.45393	-6.00079	-2.19974	-1.78493	-1.89489	-2.09356	-2.27306	-2.41167	-3.72543	-1.78428	-3.08104	-2.31383	-2.35624	-4.5146	0.61207	0.946858	6.11454e-05	linear_increasing	5.83741e-08	5.96782e-07
SLCO2A1	-	-3.97113	-1.81527	-5.63108	-5.78285	-4.22148	-5.87309	-3.33552	-6.35299	-5.87115	-3.99103	-4.03036	-5.48141	-4.366	-4.71916	-4.48419	-4.92916	-4.53631	-5.03458	-3.99318	-6.73959	-5.74687	-5.41989	-5.01455	-4.32454	-3.67151	-4.69808	-4.18404	-2.5025	-4.26955	-5.39515	-2.0467	-2.36213	-1.98167	-0.797587	-1.71939	-0.643213	-2.20428	-1.52776	-3.70285	-3.7377	-2.07233	-4.67954	1.03445	1.07795	0.000213418	linear_increasing	6.54643e-08	6.62223e-07
RNASE4	-	-6.97659	-3.08414	-6.5744	-4.94362	-4.0751	-7.12594	-3.30948	-5.8425	-3.47743	-3.13219	-4.42448	-3.24591	-5.21152	-2.85162	-5.82942	-3.89749	-4.73973	-5.23902	-7.47778	-6.54684	-2.65668	-3.46147	-3.7118	-3.75325	-5.51814	-5.88419	-4.85682	-4.24157	-4.3647	-2.89748	-1.12017	-1.99402	0.17198	-1.13117	-0.0488494	-4.54045	-0.44917	-1.18605	-0.273473	-4.14276	-1.47141	-4.64504	1.64497	1.40443	6.25777e-05	linear_increasing	7.0398e-07	5.45584e-06
RPS6KA1	-	-2.56339	-6.73543	-3.62643	-2.84872	-4.20667	-5.69732	-5.62861	-4.74754	-3.50857	-6.03704	-5.48423	-2.77778	-2.44175	-5.63818	-4.05544	-5.21295	-5.52093	-5.54003	-5.20164	-2.43467	-4.28404	-4.75198	-5.01697	-5.61345	-2.22249	-6.11193	-4.24654	-5.52753	-6.46748	-5.80956	-1.57064	-1.35078	-1.45961	-1.33762	-3.38934	-1.35949	-5.28034	-1.8773	-1.86944	-1.57364	-2.10682	-4.66531	1.27094	1.32327	0.017313	linear_increasing	4.50957e-06	2.65871e-05
RTN3	-	-3.46993	-4.30425	-7.93878	-5.15235	-3.70703	-3.5144	-2.85214	-2.83779	-5.27837	-6.25354	-4.03823	-6.25527	-7.05463	-4.68784	-4.39655	-4.27428	-2.62225	-6.5482	-3.3073	-2.82042	-3.53682	-5.59186	-6.62824	-5.88561	-4.60854	-4.17128	-2.60101	-2.90465	-3.98109	-2.38885	0.112942	-1.70966	-0.62068	-3.98907	-0.585217	0.511258	-0.327522	-0.336124	-4.54723	-0.0354479	-1.15267	-4.45372	1.74641	1.5028	7.39707e-05	linear_increasing	1.13897e-06	8.19888e-06
GTPBP1	-	-4.12113	-5.46254	-3.94151	-3.23395	-4.38153	-5.77876	-3.68475	-6.3342	-3.13657	-4.09502	-4.15631	-5.67584	-3.92887	-5.05058	-4.66183	-3.56309	-4.0003	-4.62799	-5.49254	-3.92566	-6.47582	-4.37358	-4.76865	-3.99367	-6.12189	-5.18557	-5.37592	-4.57808	-4.0323	-4.56218	-3.46413	-3.42751	-3.43886	-3.22795	-3.57222	-3.1772	-2.8799	-3.61579	-5.72509	-3.02011	-3.55488	-4.62402	0.798807	0.894128	0.0795591	other_trend	0.00180566	0.00451885
FNTA	-	-3.67361	-5.39279	-6.32816	-4.45237	-4.46776	-4.61596	-3.67487	-4.68848	-4.13267	-5.29502	-5.94008	-4.54189	-3.83274	-4.59295	-5.15203	-6.17138	-5.27369	-4.14438	-4.37341	-3.75785	-4.257	-3.15447	-6.77502	-5.68117	-3.84116	-5.40187	-7.81495	-3.09585	-2.26662	-4.76707	-3.9238	-3.80841	-4.00133	-3.50764	-3.74851	-3.71435	-3.39659	-3.82456	-2.73316	-3.35996	-3.60183	-4.71858	0.373244	1.16909	0.0219086	linear_increasing	0.00543973	0.0114143
MME	-	-4.51688	-3.48817	-5.55137	-4.12701	-4.0187	-1.53344	-3.78706	-5.25055	-3.61094	-5.50552	-7.51828	-1.4874	-5.1581	-5.85383	-4.41373	-3.89007	-5.37564	-5.49618	-3.43165	-4.56776	-6.69641	-4.05413	-6.51643	-5.07054	-3.53482	-4.71013	-5.86074	-6.20214	-3.69763	-4.06975	-1.6521	-1.61624	-2.06478	-1.00027	-3.65715	-4.20875	-2.37814	-1.69697	-1.41215	-1.78562	-2.14722	-4.63317	1.01687	1.35629	0.0131605	linear_increasing	5.14986e-06	3.00077e-05
MMP23B	-	-4.46093	-4.55684	-5.07966	-6.05988	-3.64253	-6.67517	-2.3578	-2.97595	-2.52229	-2.4578	-4.52939	-2.98816	-5.04005	-5.72348	-4.03926	-5.14606	-5.21717	-5.40513	-4.56182	-5.56031	-4.77746	-5.58812	-6.16629	-4.95717	-6.15353	-6.8343	-3.92808	-4.84226	-3.80925	-4.58265	-0.503071	-4.58816	0.32019	-0.713474	-0.38557	0.0750883	-3.94766	-0.920974	-0.370943	-0.457117	-1.14917	-4.68796	1.68796	1.21341	0.00313321	linear_increasing	1.21649e-08	1.49878e-07
SPARCL1	-	-6.03031	-5.30731	-5.61332	-3.9255	-3.94109	-4.50921	-5.15346	-5.86972	-6.79659	-2.41155	-5.06357	-3.24115	-5.93337	-5.70106	-5.04585	-5.01602	-4.73001	-5.31949	-3.15938	-5.21822	-4.25374	-4.10403	-3.6448	-7.67353	-3.05183	-5.68914	-4.63913	-3.25857	-3.99923	-3.35934	-4.51772	-2.24324	-1.13464	-1.3802	-1.84945	-1.15639	-4.69565	-1.75528	-1.87088	-0.884748	-2.14882	-4.72198	1.35936	1.20318	7.38928e-05	linear_increasing	1.59392e-06	1.08251e-05
RAP2B	-	-5.57796	-2.64538	-4.21063	-4.79937	-4.00804	-5.32243	-4.1394	-3.51773	-4.49314	-5.00446	-7.99632	-4.40973	-5.59676	-4.71271	-5.422	-4.63137	-5.38612	-3.65488	-4.60174	-4.5552	-3.77043	-3.90571	-5.67029	-1.81605	-3.63002	-3.57459	-5.91324	-3.72032	-5.67558	-5.42972	-2.00779	-1.71651	-2.0279	-1.92452	-5.52549	-6.06619	-2.65268	-1.9826	-2.2279	-2.00662	-2.81382	-4.59304	1.59531	1.15321	0.0139399	linear_increasing	0.000464637	0.00142657
GSTM2	-	-5.33735	-5.19428	-4.65773	-5.95936	-3.93486	-3.5141	-4.85248	-4.54639	-4.44672	-5.1315	-4.02646	-5.13441	-5.32829	-5.93612	-5.98291	-6.5739	-2.81967	-2.61178	-6.41422	-4.73063	-2.91428	-4.49302	-4.68074	-4.90756	-2.34913	-5.68946	-5.06251	-7.20125	-2.96263	-5.43378	-0.232904	-5.23548	-0.591634	-1.07356	-4.89795	-1.70075	-1.51741	-0.753684	-6.07727	-2.0714	-2.4152	-4.76092	2.15024	1.21342	0.0047568	linear_increasing	0.000110478	0.000415534
PLP2	-	-5.54462	-3.4732	-3.29156	-4.13008	-3.69895	-3.99607	-6.01035	-3.54265	-4.64722	-5.9042	-5.14843	-5.54153	-4.01427	-3.14839	-5.85593	-3.20832	-4.11445	-5.30179	-4.14427	-5.86336	-6.57732	-5.40786	-4.22979	-4.59287	-5.60469	-1.67399	-6.86089	-4.89562	-4.94702	-4.09852	-0.991059	-5.33692	-5.88612	-1.30068	-0.586853	-0.450141	-0.995976	-1.22488	-0.470087	-5.12189	-2.23646	-4.64894	2.243	1.16759	0.0210747	linear_increasing	7.91651e-05	0.000313077
COL4A5	-	-5.28527	-4.37866	-5.09685	-3.03044	-2.75278	-4.60795	-4.15157	-2.08945	-4.35684	-5.47513	-5.0308	-3.7848	-2.66315	-6.13791	-4.35577	-4.11772	-5.54904	-2.62542	-6.73491	-3.23725	-4.23879	-4.05248	-2.86167	-5.02124	-5.03301	-5.51805	-3.44499	-5.10605	-5.66071	-6.05858	0.508797	-0.640549	0.933922	0.704846	0.0799979	0.409602	-0.441396	0.228056	0.116881	0.764629	0.266479	-4.41524	0.51071	1.1879	0.000131754	linear_increasing	1.64037e-14	1.94301e-12
CALCRL	-	-5.8632	-4.78508	-4.14732	-5.74316	-3.48476	-4.80461	-4.86373	-5.79458	-4.76775	-5.58995	-5.27366	-5.39202	-3.03537	-3.22861	-5.82026	-4.69741	-6.27715	-5.637	-5.08789	-4.67882	-2.91726	-4.82723	-7.38349	-3.10965	-5.53466	-4.07437	-4.4534	-5.34786	-4.22925	-4.7156	-0.0550266	-1.47226	-1.17599	-0.272171	-1.26654	-0.952224	-5.03939	-0.286105	-0.593248	-0.381903	-1.14949	-4.85217	1.44915	1.03055	1.82471e-05	linear_increasing	8.64902e-11	2.13121e-09
CD47	-	-3.10655	-3.67006	-6.43298	-3.39789	-3.02289	-7.46965	-3.30228	-4.22828	-4.57447	-6.54419	-3.38325	-2.41173	-5.71329	-5.19021	-5.82648	-4.66745	-4.87411	-4.88793	-4.20851	-5.09196	-3.38355	-5.38391	-4.9702	-4.3727	-5.33273	-4.11269	-2.26699	-2.68102	-4.58019	-4.19427	-4.6027	-0.267863	0.141176	-0.00369683	-0.160239	0.139955	-4.14829	0.0678121	0.199376	-3.2474	-1.18819	-4.44275	1.97209	1.25602	0.000440338	linear_increasing	3.96943e-07	3.37577e-06
WNT2	-	-6.02496	-5.11152	-4.47922	-6.59981	-3.59044	-4.9633	-5.30567	-3.71824	-3.43232	-4.21738	-5.18375	-6.2947	-5.86244	-3.79761	-3.90265	-5.27521	-3.77697	-3.73211	-4.35181	-1.98962	-6.24726	-4.55484	-5.72201	-5.57955	-5.62386	-5.2045	-5.68897	-2.52097	-3.74195	-4.7649	-1.50428	-2.60669	-0.320115	-1.45471	-2.24582	-1.87656	-3.20646	-1.89424	-5.28441	-4.48905	-2.48823	-4.70862	1.48603	1.13269	0.000113659	linear_increasing	1.49769e-05	7.43372e-05
TSTD1	-	-2.10311	-5.4559	-4.37675	-5.46119	-3.04961	-5.06738	-4.82155	-7.6325	-3.30933	-2.07968	-3.39355	-3.49709	-3.21921	-4.3818	-4.67969	-3.70573	-5.83191	-6.00511	-4.45856	-4.84256	-3.27966	-6.01344	-5.27799	-5.50481	-4.74694	-3.60786	-4.45255	-7.49199	-4.31553	-3.10033	-1.86268	-1.65592	-1.61903	-1.58559	-4.69629	-1.40988	-6.37571	-3.94366	-0.945559	-1.58157	-2.56759	-4.50544	1.79699	1.3534	0.0731299	other_trend	0.00088423	0.00245237
GNG5	-	-5.46012	-4.53515	-5.19642	-3.59236	-3.25056	-7.07733	-4.49454	-5.13453	-2.3251	-3.79145	-3.29812	-4.90326	-5.95208	-6.97502	-4.55722	-4.34185	-4.74955	-6.61294	-5.33363	-4.42922	-7.67807	-4.88627	-3.47838	-3.15682	-4.26716	-5.04035	-3.67102	-4.93498	-5.6969	-3.12907	-2.20912	-1.86123	-2.85374	-2.49719	-2.25148	-1.7955	-2.68875	-2.43826	-3.59964	-2.30142	-2.44963	-4.73165	0.52053	1.27562	0.0015804	linear_increasing	3.04788e-06	1.8958e-05
ERLIN1	-	-5.56104	-6.13277	-5.7137	-4.70038	-3.49392	-5.42334	-3.30996	-5.12742	-5.07789	-3.98639	-4.15091	-4.79268	-5.71435	-3.5608	-5.13291	-6.25403	-3.74977	-2.55269	-5.11388	-5.33178	-6.89672	-5.43548	-3.27737	-4.50167	-3.93183	-3.99273	-6.05188	-4.9459	-4.24322	-3.66705	-3.03979	-2.76343	-2.84115	-2.93879	-2.6737	-2.52469	-4.29105	-2.88863	-2.74839	-2.96607	-2.96757	-4.72748	0.488999	1.04306	0.000154901	linear_increasing	9.18585e-06	4.90422e-05
PODXL	-	-2.29062	-4.93443	-3.42611	-4.37008	-1.10576	-2.90111	-5.39536	-5.33251	-4.60881	-3.73708	-5.99975	-4.05188	-5.65092	-3.85744	-5.33182	-3.494	-3.7183	-2.30211	-6.25984	-6.89118	-6.45605	-6.16653	-3.97312	-6.74219	-4.0655	-3.54132	-4.3297	-4.53151	-4.90988	-4.26211	0.98186	1.26213	0.58069	0.967149	0.286513	1.18705	-5.44481	1.28841	1.26477	0.679773	0.305354	-4.4879	2.0482	1.38739	0.00122336	linear_increasing	3.80603e-10	8.03867e-09
MEST	-	-5.09639	-3.75059	-4.57929	-4.23061	-2.18185	-7.30526	-4.30892	-3.45909	-2.33779	-3.08904	-6.38394	-5.51299	-5.12052	-5.28595	-4.86908	-5.85447	-4.55425	-3.57496	-3.635	-4.20822	-5.68051	-5.11744	-4.71171	-5.14182	-5.40776	-5.24987	-4.99514	-5.0538	-4.08777	-4.10251	-1.34245	-2.48103	-0.341384	-0.511433	-2.25588	-0.930761	-2.60189	-3.79138	-1.39232	-1.42917	-1.70777	-4.62955	1.06728	1.10267	0.00102591	linear_increasing	9.35574e-09	1.22291e-07
ADAM10	-	-3.60903	-4.75363	-6.45621	-3.33782	-1.97215	-3.90046	-3.68485	-5.30869	-6.56356	-6.01793	-5.15886	-5.84343	-6.0003	-4.39486	-1.97509	-4.90244	-6.46924	-5.29666	-3.38418	-2.31315	-3.72572	-3.05605	-4.13054	-3.18337	-3.64997	-3.15869	-4.40485	-4.75404	-5.17758	-4.97038	-1.95614	-1.7067	-6.21035	-1.36081	-3.9413	-1.07018	-2.00287	-1.64286	-3.72994	-1.48214	-2.51033	-4.38512	1.62073	1.30883	0.00861007	linear_increasing	0.00068739	0.00200785
TOP1	-	-6.28142	-5.66704	-4.60378	-4.99766	-7.8887	-1.14561	-6.89362	-4.5578	-3.95392	-3.33353	-5.78351	-2.72806	-5.09122	-4.30846	-6.25737	-4.84502	-6.34827	-5.31318	-3.65403	-4.97696	-4.61076	-5.68735	-4.08405	-4.22377	-5.93645	-5.20723	-4.9571	-3.40949	-4.15956	-6.19026	-2.32054	-2.38848	-2.51421	-2.70396	-2.57161	-1.96076	-4.37794	-2.6102	-6.67837	-2.5478	-3.06739	-4.90317	1.4206	1.33973	0.00488984	linear_increasing	0.000682949	0.00199791
DDX58	-	-5.29274	-4.55029	-5.98978	-2.57851	-5.60584	-3.3856	-3.69825	-3.42337	-4.30202	-3.29253	-5.22568	-3.38618	-3.90246	-3.98256	-4.79252	-4.44434	-4.7154	-4.40019	-3.54966	-2.72885	-6.13586	-6.16243	-4.99569	-3.15344	-4.77507	-5.82718	-2.5639	-3.39057	-2.0778	-3.8236	-2.92995	-2.7202	-3.13929	-3.11119	-2.77368	-3.28725	-3.72629	-3.54163	-3.56771	-2.51316	-3.13103	-4.20508	0.402376	1.12822	0.00392105	linear_increasing	0.00574926	0.011869
LGALS9	-	-3.89761	-3.38087	-4.604	-3.09382	-5.62216	-5.24357	-4.95688	-4.18152	-5.13962	-3.82417	-4.50677	-5.20526	-4.5076	-4.96016	-4.30746	-6.95671	-4.739	-3.62108	-1.52056	-4.65117	-3.0373	-4.15539	-3.46031	-3.50884	-6.41168	-5.35696	-3.92379	-5.25354	-5.67287	-5.89306	-1.89372	-0.0834939	-2.046	-2.45728	-6.48523	-4.79418	-5.45506	-2.07424	-1.69128	-2.33044	-2.93109	-4.51979	1.98042	1.11445	0.103364	other_trend	0.00296129	0.0068
ENO2	-	-3.92766	-1.82858	-5.75943	-3.52728	-5.66806	-4.55634	-3.63421	-5.35704	-4.47546	-5.25758	-6.00956	-6.14401	-7.14667	-4.52566	-5.71524	-0.883347	-5.09357	-4.16533	-3.65074	-4.78333	-4.24662	-6.35489	-5.44559	-4.84019	-7.3843	-3.75131	-3.89182	-5.78509	-4.53007	-3.90757	-1.47574	-1.46815	-1.10092	-1.42613	-1.35975	-1.12794	-0.830672	-0.930887	-1.30364	-0.707253	-1.17311	-4.74155	0.277836	1.38028	0.000537225	linear_increasing	9.67243e-10	1.77051e-08
PGM3	-	-5.34885	-4.76176	-6.10542	-2.39325	-5.52846	-5.74829	-3.88022	-5.55092	-4.96203	-3.01604	-4.00866	-6.60354	-6.51627	-3.71468	-3.11318	-5.85958	-2.84229	-2.32876	-6.65058	-6.20964	-5.28262	-5.10854	-4.58509	-3.8564	-4.90608	-3.35827	-6.22262	-4.53775	-4.01739	-5.92865	-2.59534	-2.24552	-2.48188	-2.5466	-2.91858	-2.55954	-3.77568	-2.84426	-6.29529	-3.03546	-3.12982	-4.76486	1.18908	1.29277	0.00975932	linear_increasing	0.00111112	0.00299518
CD151	-	-5.06488	-4.76258	-3.97276	-4.24207	-4.96298	-4.55249	-3.95353	-6.30782	-5.53956	-5.34852	-6.00166	-5.7785	-4.03074	-4.12212	-2.61886	-5.18986	-3.78989	-2.83068	-4.05208	-4.77597	-2.01208	-5.10567	-4.3893	-4.26673	-4.16791	-6.43163	-3.88233	-3.16272	-4.28431	-5.89107	-2.12047	-2.3141	-2.04077	-1.96912	-1.41495	-1.46927	-1.7666	-2.07982	-1.93586	-1.94597	-1.90569	-4.51638	0.282584	1.06285	9.3413e-06	linear_increasing	3.65322e-09	5.52873e-08
TM9SF3	-	-4.86864	-5.78012	-5.13853	-6.3789	-4.98108	-3.43041	-5.13543	-4.34759	-5.39926	-4.23072	-3.7896	-2.24927	-4.14251	-4.41058	-4.29001	-5.11778	-4.8881	-4.6767	-2.10366	-5.36088	-4.89791	-3.21812	-4.73121	-4.90573	-3.93667	-4.4277	-3.2226	-4.05666	-7.4881	-4.82869	-1.83294	-0.958282	-1.26189	-1.80206	-5.4908	-1.96072	-3.3311	-1.76072	-1.88202	-1.89789	-2.21784	-4.54777	1.30227	1.08806	0.000481168	linear_increasing	2.10985e-06	1.36078e-05
AZGP1	-	-4.8973	-2.6963	-5.79215	-4.55438	-4.69404	-4.6171	-3.12784	-4.17086	-4.50361	-5.27321	-5.08301	-2.71204	-3.80902	-4.34498	-4.52707	-4.67571	-5.20008	-4.05055	-7.07243	-4.20738	-3.33657	-4.35254	-3.26034	-4.66118	-5.7786	-3.59936	-4.46738	-5.94219	-4.9848	-5.06396	-4.70982	-2.17196	-1.68804	-2.27966	-1.33656	-2.09809	0.271582	-1.99574	-2.28756	-5.0078	-2.33037	-4.5152	1.53465	0.968473	0.0086336	linear_increasing	5.15221e-06	3.00077e-05
UACA	-	-3.69831	-4.57261	-5.80255	-3.50414	-4.8655	-3.55007	-7.58136	-2.33408	-4.76845	-4.83839	-4.528	-5.41662	-5.11918	-3.0622	-6.96058	-5.26363	-5.54926	-5.3567	-2.99579	-4.8035	-5.47297	-5.51044	-4.92743	-5.57896	-4.22424	-2.8037	-5.64043	-5.24086	-3.7276	-3.89166	-2.67955	-3.08626	-2.18922	-1.91722	-2.85748	-2.76136	-2.69463	-2.04845	-2.50924	-4.97384	-2.77173	-4.71964	0.858399	1.18177	0.00268485	linear_increasing	2.55304e-05	0.00011824
SH3BGRL2	-	-5.14628	-5.83508	-4.71979	-6.54077	-4.76554	-7.04961	-2.7292	-5.91305	-3.14396	-3.39734	-6.62315	-3.08228	-5.37036	-5.09267	-5.52891	-3.48172	-4.90373	-4.31985	-5.26329	-4.24858	-5.52355	-5.6322	-4.675	-6.36626	-3.49773	-4.16202	-3.55682	-4.63978	-3.99832	-1.61631	-1.32159	-1.45809	-4.9166	-1.27675	-1.24367	-1.9192	-2.81271	-1.75031	-1.46123	-0.817478	-1.89776	-4.6941	1.18645	1.27364	7.91794e-06	linear_increasing	4.03262e-07	3.39943e-06
GIMAP8	-	-4.45568	-5.90582	-5.24283	-4.5185	-4.67824	-5.34476	-5.43227	-4.51102	-3.26495	-3.41451	-4.49267	-5.3378	-4.34024	-5.44323	-4.23217	-3.80944	-2.90683	-3.89432	-6.23643	-4.64683	-6.54118	-5.16789	-4.85185	-4.77433	-3.58292	-4.68197	-6.93889	-5.59791	-4.48215	-4.28541	-1.92506	-2.27514	-2.25762	-1.25724	-5.14056	-1.48943	-2.17527	-1.89695	-1.85813	-1.62819	-2.19036	-4.7671	1.08835	0.941415	0.000370872	linear_increasing	1.26545e-08	1.53936e-07
LLGL2	-	-5.20241	-2.32271	-2.36668	-3.54978	-4.87455	-5.68084	-5.07727	-3.49192	-5.75485	-4.1642	-6.14657	-3.75728	-5.19197	-5.84491	-4.79895	-2.26885	-4.38801	-5.65716	-6.32969	-5.84321	-6.20853	-2.46858	-6.23299	-8.3997	-4.4523	-6.454	-6.13823	-6.8705	-4.23698	-4.53389	-1.89006	-2.1996	-1.69422	-1.44468	-2.09303	-1.5219	-1.8713	-2.2013	-1.87265	-1.29894	-1.80877	-4.95692	0.31449	1.48054	0.0260969	linear_increasing	8.07825e-08	8.04476e-07
COX6B1	-	-7.52635	-2.80493	-6.02825	-5.11739	-4.23666	-4.87002	-4.35927	-4.31935	-5.84974	-3.0024	-3.02981	0.304065	-5.10232	-6.14236	-4.52178	-4.21115	-7.48802	-7.65083	-3.07384	-3.61737	-3.83951	-5.06319	-5.56687	-6.0007	-5.20583	-4.84753	-1.76168	-6.42538	-2.46081	-4.6029	0.798545	1.6142	1.0252	0.863955	0.300475	0.831667	-0.161136	1.15974	0.49714	0.508186	0.743798	-4.61407	0.490664	1.75059	1.30284e-05	linear_increasing	1.47487e-11	4.64705e-10
COL4A3	-	-6.88715	-3.97397	-3.89529	-5.44413	-3.77061	-3.15457	-5.56336	-4.98287	-6.01046	-5.9547	-3.90614	-3.78034	-4.5534	-5.29647	-3.91324	-6.10516	-0.673819	-3.88654	-6.2403	-2.58343	-4.03763	-4.67339	-4.13658	-5.61737	-4.22813	-4.36099	-3.8644	-4.72761	-3.45138	-3.82072	1.83441	0.718234	2.08772	2.03315	1.52259	1.99553	0.793762	1.62442	1.09875	2.295	1.60036	-4.44981	0.558298	1.24764	1.02215e-07	linear_increasing	2.60089e-17	9.99784e-15
MCU	-	-3.17179	-5.26318	-4.02932	-3.37251	-4.18301	-2.55932	-4.83386	-3.09457	-6.79268	-8.06353	-6.26232	-3.15073	-5.76588	-6.10087	-4.62778	-5.95821	-4.90763	-3.55164	-3.93505	-4.34723	-6.55226	-4.84197	-2.69808	-3.40181	-6.1206	-2.44777	-4.19388	-4.99699	-4.37678	-1.44412	-1.28882	-1.48379	-1.83156	-1.82323	-1.88151	-1.93872	-2.64924	-1.48883	-4.46283	-1.36854	-2.02171	-4.50151	0.94234	1.50521	0.00063289	linear_increasing	1.95058e-05	9.32591e-05
TUBA1C	-	-1.04315	-4.88585	-5.58754	-6.38992	-3.95886	-3.07553	-5.07925	-3.01623	-2.48245	-3.9602	-3.99191	-5.83927	-4.49615	-4.67414	-4.85011	-4.94878	-4.44795	-3.95902	-4.08731	-5.17677	-6.03106	-5.06569	-4.85363	-4.75154	-5.09576	-2.59796	-4.17702	-5.14412	-8.41298	-4.31113	-1.23381	-1.25677	-3.84728	-4.14433	-1.40698	-1.34348	-3.47379	-1.18781	-1.5238	-1.07564	-2.04937	-4.54638	1.23923	1.33947	0.0702307	other_trend	7.21696e-06	4.03227e-05
TOLLIP	-	-5.86641	-5.14289	-4.19617	-5.71156	-3.90616	-4.32471	-3.89687	-5.20914	-4.74836	-4.51819	-6.73727	-5.95654	-2.49197	-2.45042	-3.22753	-3.81791	-4.44115	-5.13133	-1.90162	-4.72176	-4.56941	-4.4185	-2.66303	-6.04344	-4.61284	-4.38138	-4.93251	-6.35612	-7.34604	-4.70954	-4.1999	-1.69713	-1.59959	-1.50208	-7.38427	-1.4584	-4.1207	-1.48085	-1.51918	-1.63672	-2.65988	-4.61436	1.98323	1.27277	0.0350642	linear_increasing	0.000819235	0.00230537
IGHV3-72	-	-4.38916	-4.85047	-3.61533	-4.27747	-2.98419	-4.03837	-4.3813	-4.42326	-4.14263	-4.7499	-4.07452	-4.05609	-4.56172	-5.82823	-7.27508	-3.88764	-5.76464	-5.96832	-6.54363	-5.32705	-6.32836	-5.53073	1.2655	-5.42711	-4.88939	-2.99591	-3.68063	-2.78345	-6.33772	-4.92326	0.979528	-5.327	0.818412	0.887674	1.22061	1.28263	2.34888	-5.88977	1.71652	3.00196	0.103945	-4.559	3.09095	1.55935	0.00257625	linear_increasing	2.26142e-07	2.0216e-06
SEPHS1	-	-5.2215	-4.53698	-4.90965	-4.54342	-3.71144	-3.98387	-2.24579	-4.16229	-4.40469	-4.83642	-3.77176	-3.90723	-3.70946	-4.18776	-5.90318	-4.34655	-4.84747	-6.24739	-5.14218	-6.58862	-3.52482	-4.93372	-4.42678	-4.0029	-5.52422	-4.67966	-5.31164	-1.57218	-2.52247	-2.81799	-1.94011	-2.17503	-2.26373	-1.97037	-5.8399	-3.05359	-4.18836	-2.06992	-7.00986	-2.19279	-3.27037	-4.3508	1.81815	1.11755	0.0267114	linear_increasing	0.0306197	0.0482901
CFL2	-	-3.01753	-5.2306	-4.57449	-6.16209	-3.59606	-2.66924	-4.85148	-3.74585	-6.01568	-4.62198	-5.7153	-3.63904	-3.51172	-4.18391	-2.10737	-4.80296	-4.55976	-5.09281	-3.96606	-3.34562	-4.14355	-6.04001	-6.85922	-4.78928	-4.37682	-6.16133	-6.13433	-5.94736	-3.30787	-4.27219	-1.9147	-5.12552	-1.61656	-1.37219	-1.02635	-3.39668	-1.53298	-1.36945	-1.33837	-6.04754	-2.47403	-4.58138	1.77654	1.18497	0.0205152	linear_increasing	0.000122376	0.000451959
PCBD1	-	-5.07374	-5.16011	-4.74193	-3.88948	-2.5933	-5.62173	-4.39779	-4.55927	-4.30193	-0.681831	-3.41021	-5.25256	-3.94322	-5.12711	-4.29535	-3.93729	-5.71885	-6.07398	-4.56109	-4.97647	-1.83553	-4.64435	-3.77431	-4.19342	-4.05613	-2.80914	-5.38385	-3.09529	-4.04898	-5.77536	-2.05889	-1.48492	-0.834169	-1.44164	-2.39771	-0.515245	-1.14285	-0.186188	-2.35723	-0.625057	-1.30439	-4.26445	0.782187	1.19551	0.0002504	linear_increasing	9.91613e-09	1.27059e-07
EPB41L1	-	-3.70017	-6.45616	-5.6804	-4.96023	-3.31137	-5.18328	-4.76443	-3.40716	-2.47903	-4.26537	-5.28866	-4.73604	-4.86264	-6.61694	-5.05688	-4.58355	-6.36111	-5.38667	-5.54397	-3.35317	-2.12017	-5.90003	-3.37939	-4.80001	-3.22182	-5.54245	-6.40295	-5.62101	-4.74611	-3.3479	-5.95772	-2.7957	-2.86635	-2.94068	-2.87097	-3.42996	-3.08973	-2.34512	-3.73625	-2.7444	-3.27769	-4.70264	1.01576	1.20832	0.0409471	linear_increasing	0.00184572	0.00460114
SPAG9	-	-5.59972	-5.4922	-5.00772	-4.00134	-2.78518	-3.23575	-5.02053	-4.92845	-4.68367	-4.20747	-5.94126	-3.88204	-4.68165	-3.64321	-3.06648	-4.23841	-5.05184	-4.00652	-4.78108	-4.92374	-5.10164	-6.13932	-5.31969	-4.02776	-2.58127	-3.90422	-5.56332	-5.83633	-4.37396	-2.74233	-2.76915	-2.72906	-2.75236	-1.8802	-2.11594	-6.45779	-4.54489	-2.67416	-2.88416	-4.99215	-3.37998	-4.49227	1.46101	0.982079	0.0147152	linear_increasing	0.00945569	0.0181557
GCDH	-	-5.99093	-4.15614	-5.65233	-3.89684	-2.40473	-3.1742	-5.7856	-3.53086	-5.62073	-4.59326	-5.16141	-4.60936	-5.2558	-3.55272	-2.23427	-3.79403	-3.21778	-5.64499	-3.15842	-3.4209	-5.55825	-5.41995	-6.14074	-4.97001	-3.63186	-6.10643	-5.23471	-3.32413	-5.01161	-3.29236	-2.97915	-2.58831	-3.07548	-3.50001	-4.1151	-5.04717	-4.07122	-3.12075	-3.37778	-3.40523	-3.52802	-4.45151	0.710317	1.164	0.0546327	other_trend	0.0238003	0.0390308
IFIT1	-	-4.53313	-6.52056	-5.18901	-5.48381	-0.757728	-4.39344	-4.30155	-3.59009	-5.96757	-5.17681	-2.22103	-4.44039	-4.02405	-4.97634	-4.61807	-6.76148	-4.4809	-6.49666	-4.9404	-4.83907	-3.57099	-2.90144	-6.31591	-3.52731	-1.88761	-5.33131	-4.58199	-4.90312	-5.03142	-3.89248	-2.24355	-2.15043	-2.18576	-2.11116	-5.77581	-2.03653	-6.30344	-1.98805	-4.61928	-1.53985	-3.09539	-4.52186	1.76321	1.36559	0.0524435	other_trend	0.0114255	0.0211888
CCN5	-	-1.03361	-0.686335	-1.91918	-4.89077	-7.77435	-2.12058	-5.39619	-4.07252	-2.64804	-5.56548	-3.58145	-2.98932	-3.8431	-3.9763	-5.59853	-4.22258	-4.84589	-3.13026	-4.70741	-1.44213	-4.04878	-4.96309	-4.00768	-4.34138	-4.5892	-4.00717	-4.51827	-2.53439	-2.46044	-3.33217	1.50296	-0.13112	2.67393	1.6311	2.75847	3.01055	1.41134	0.325055	1.50866	-0.190616	1.45003	-3.77489	1.16156	1.51273	7.77324e-05	linear_increasing	3.86674e-12	1.58125e-10
TNS2	-	-6.19308	-5.44916	-2.3963	-3.61162	-6.51182	-2.53635	-3.76201	-3.88789	-5.62669	-3.82679	-4.88452	-4.67965	-3.10386	-5.33777	-4.82351	-4.97366	-2.25327	-4.96958	-3.42867	-5.07516	-5.35494	-2.73005	-6.18577	-4.11892	-2.77372	-3.43285	-5.77295	-3.55412	-4.79464	-5.38901	-1.32799	-1.55648	-1.77109	-1.05448	-1.02857	-0.756222	-5.04875	-1.42061	-0.980251	-1.56168	-1.65061	-4.38128	1.23501	1.22296	0.000480927	linear_increasing	4.14376e-07	3.47786e-06
ACSL5	-	-5.4816	-5.9878	-3.85071	-2.74605	-6.48238	-1.76669	-1.55098	-5.74161	-5.47122	-2.51587	-6.08766	-6.00715	-5.0073	-4.64992	-5.75225	-2.60865	-2.78683	-5.22495	-2.68533	-4.5143	-5.25909	-4.43572	-4.02838	-2.63604	-3.30281	-6.54717	-3.26154	-2.90842	-4.79376	-1.02153	-0.843366	-0.828133	-0.948925	-1.10008	-1.59987	-1.24695	-1.01338	-1.35043	-0.782211	-1.16733	-1.08807	-4.17046	0.259995	1.58725	1.12916e-05	linear_increasing	4.67026e-07	3.85247e-06
LAMTOR2	-	-4.24677	-4.62297	-3.98267	-6.26367	-6.46634	-5.64808	-4.58363	-3.50451	-1.99795	-5.54354	-4.81602	-5.2356	-2.02977	-5.82183	-4.00641	-4.83611	-4.95473	-2.39791	-5.10875	-4.00471	-4.72565	-5.87455	-2.95178	-2.84727	-3.82439	-3.38178	-5.83012	-6.81425	-5.37718	-3.52991	-1.50361	-0.792628	-1.40827	-1.50895	-6.14749	-2.14063	-4.49727	-1.42247	-1.84988	-1.94071	-2.32119	-4.50763	1.66937	1.29571	0.00386452	linear_increasing	0.00011567	0.000431684
LIMD1	-	-3.87683	-5.79913	-3.24692	-4.91776	-6.27303	-5.15179	-3.8086	-5.42337	-3.79274	-6.16694	-5.21659	-4.53079	-7.8242	-5.62285	-6.15127	-4.76338	-4.07084	-3.82106	-3.7878	-4.79318	-5.82071	-4.65741	-6.1373	-5.79582	-5.59053	-4.71433	-2.57803	-4.34991	-4.6654	-4.04845	-3.86945	-3.3253	-3.34576	-2.95835	-3.35214	-3.22738	-4.19497	-3.31182	-2.95823	-2.93543	-3.34788	-4.91323	0.405467	1.09934	0.00369573	linear_increasing	9.21594e-05	0.000356399
PRKCD	-	-4.88707	-5.18361	-3.53338	-4.53441	-6.05906	-5.17625	-4.78507	-4.77659	-3.94732	-3.96905	-3.60419	-2.58342	-4.12537	-6.2565	-4.09788	-5.12758	-5.15167	-6.37564	-4.90054	-4.26193	-5.43675	-2.81856	-4.16483	-5.69023	-2.73678	-5.65121	-4.84511	-4.00347	-5.4572	-2.11252	-1.97694	-1.37385	-2.36507	-2.19742	-4.83398	-2.72866	-4.60267	-2.48032	-3.39742	-2.14908	-2.81054	-4.54177	1.13221	1.08596	0.00164273	linear_increasing	0.000107557	0.000406137
UQCRH	-	-3.88733	-5.22057	-2.3544	-4.94088	-5.97804	-5.94238	-2.83016	-4.20508	-3.96044	-3.07433	-5.52097	-6.48659	-2.1304	-4.73125	-5.65865	-4.6271	-1.9636	-4.37389	-1.65449	-5.79943	-2.61915	-5.78716	-5.55193	-6.11077	-4.89775	-4.89232	-4.44088	-4.07134	-4.90497	-3.70913	-1.74337	-1.40938	-1.22844	-1.23262	-1.49356	-1.61439	-1.58084	-1.16809	-1.61786	-0.890294	-1.39789	-4.41085	0.263283	1.35638	0.000616035	linear_increasing	3.12394e-08	3.41149e-07
PFDN2	-	-4.86941	-4.54908	-1.10875	-3.00148	-6.09903	-5.01077	-4.94644	-6.43819	-2.05548	-4.25722	-3.61932	-5.03765	-6.03033	-4.40086	-6.67075	-3.02162	-5.20635	-7.34947	-0.371569	-2.02794	-4.84461	-7.11274	-5.34701	-5.51405	-3.5317	-3.98902	-2.34146	-5.88281	-2.56905	-4.56384	-1.2233	-0.851936	-0.189156	-0.458089	-1.52793	-1.26006	-6.4094	-4.45746	-1.04541	-1.20596	-1.86287	-4.39227	1.9772	1.74817	0.0126995	linear_increasing	0.000455748	0.00141054
CZIB	-	-4.69915	-5.62488	-5.86043	-4.45237	-5.66817	-5.15739	-5.09416	-4.23153	-4.26708	-5.62349	-5.02617	-3.47235	-6.03351	-3.92248	-5.14105	-4.95332	-0.881007	-4.67126	-0.737304	-3.14444	-4.26609	-4.1111	-5.80496	-4.5769	-3.40852	-2.97637	-3.951	-2.36922	-5.26718	-5.85563	-0.710751	-0.406481	-0.752782	-0.86783	-0.45047	-5.08492	-0.77387	-0.376426	-6.06892	-0.621455	-1.61139	-4.37495	2.1093	1.34778	5.82452e-05	linear_increasing	2.15149e-05	0.000101851
AGFG1	-	-1.95634	-4.31973	-5.55886	-3.81653	-5.19694	-2.71221	-5.09405	-4.05799	-4.28529	-3.43456	-5.09108	-4.486	-5.15112	-5.99537	-3.34943	-5.07908	-4.14219	-3.45181	-5.56769	-5.06878	-3.0718	-3.47964	-5.70697	-4.63025	-4.88819	-3.22804	-7.29798	-4.54702	-6.06084	-1.96093	-1.56149	-2.00149	-2.02007	-1.58615	-1.47745	-3.81189	-5.2949	-1.67911	-1.78619	-4.26109	-2.54798	-4.42289	1.37577	1.22784	0.0266981	linear_increasing	0.000235679	0.000808882
NT5E	-	-1.07737	-4.30257	-3.87403	-6.40194	-4.97295	-5.15605	-3.69913	-3.16901	-4.83991	-3.6243	-3.96399	-5.6004	-4.41315	-4.29117	-2.49712	-4.76356	-1.93296	-5.02208	-4.27635	-4.98177	-2.99363	-2.29259	-2.61393	-4.18363	-3.69281	-5.59733	-4.15694	-8.17873	-5.57643	-4.97776	-1.19222	-1.46185	-3.14224	-0.363836	-0.755767	-0.845628	-5.09134	-1.42343	-1.63479	-0.835126	-1.67462	-4.23745	1.41911	1.41557	0.03291	linear_increasing	1.52689e-05	7.50559e-05
COL6A5	-	-6.93321	-3.07352	-4.00699	-3.19771	-4.82474	-4.50824	-2.75023	-3.34783	-2.13008	-4.95223	-4.38968	-5.48212	-1.95247	-3.22549	-5.53428	-5.55587	-4.70454	-5.95631	-5.40384	-4.21442	-4.91637	-1.5707	-4.87407	-4.96931	-4.10099	-2.8589	-3.85015	-2.60971	-5.42384	-4.83337	-0.407231	0.94484	-0.604432	0.943495	-2.84399	-1.41746	-2.4125	0.569943	-2.58003	0.276453	-0.753091	-4.20504	1.47641	1.29806	0.00031474	linear_increasing	2.15751e-08	2.45369e-07
SQSTM1	-	-3.25235	-5.16744	-2.66577	-7.00741	-5.16949	-3.23991	-4.00912	-3.34074	-2.62151	-5.24208	-5.36918	-6.87598	-7.27647	-2.05333	-2.3056	-5.73866	-3.57806	-1.58326	-2.82405	-4.19477	-4.82418	-5.53651	-3.77025	-1.77916	-5.40781	-4.42739	-6.50223	-4.91815	-6.02181	-4.63187	-2.83011	-3.5686	-2.99808	-5.85212	-2.80472	-2.16772	-2.97457	-3.06223	-2.43066	-2.75938	-3.14482	-4.37782	1.02168	1.59819	0.242357	other_trend	0.0284119	0.0453929
ELOC	-	-6.36375	-5.24532	-4.86632	-5.91365	-4.95453	-0.671815	-3.49653	-4.37068	-5.23982	-5.17254	-4.71951	-5.07764	-6.53084	-4.18151	-6.63469	-2.99228	-3.66981	-4.7065	-5.77036	-5.27856	-2.36369	-5.31924	-1.48747	-4.64074	-3.57738	-4.23002	-7.21564	-5.43548	-1.74551	-4.39759	-0.769789	-0.868925	-0.518038	-0.661935	-1.52911	-0.751038	-0.85456	-1.01514	-0.510479	-1.02376	-0.850278	-4.54231	0.297416	1.53672	8.74014e-06	linear_increasing	5.42457e-09	7.83912e-08
RAB5B	-	-3.59237	-6.91048	-4.15573	-3.59855	-4.9444	-4.27246	-4.82803	-3.61893	-6.86717	-5.95045	-4.80633	-4.59056	-3.97925	-3.90272	-3.98395	-4.29556	-1.15344	-6.20069	-0.385162	-6.38054	-3.9639	-4.20288	-3.1773	-2.50847	-3.72868	-7.09723	-6.31247	-6.00475	-4.191	-5.91437	-0.532555	-0.669587	-0.655263	-0.927898	-0.531521	-0.877429	-1.60238	-0.564592	-0.346338	-0.799938	-0.75075	-4.51726	0.347163	1.58737	0.000163776	linear_increasing	7.48148e-09	1.0288e-07
RNASE1	-	-3.87625	-5.24965	-5.1458	-4.03227	-4.84107	-5.64313	-3.39729	-4.94941	-3.86696	-4.70726	-4.3323	-5.02136	-5.53542	-5.93064	-4.63412	-2.75293	-5.67903	-3.4389	-5.16033	-3.06751	-6.20775	-1.32726	-4.26519	-5.29497	-5.50454	-4.04846	-4.6485	-5.54284	-2.87262	-3.55994	-3.48182	-2.94978	-2.759	-3.27036	-2.83953	-2.76269	-2.98494	-3.34163	-2.72176	-3.50103	-3.06125	-4.48446	0.308361	1.11234	0.00190403	linear_increasing	0.000314181	0.00102908
TPPP	-	-2.35245	-6.03084	-3.98273	-3.80023	-4.59853	-6.33842	-3.86896	-3.62028	-2.26505	-2.17923	-4.57046	-5.85604	-4.22118	-5.01381	-4.36797	-4.84178	-2.36963	-6.72835	-2.26389	-5.80805	-4.49908	-5.53658	-5.37498	-5.14333	-3.06091	-5.83601	-6.01461	-3.06612	-3.38601	-2.14433	-2.39761	-2.36033	-2.358	-2.34608	-2.11816	-1.94893	-2.40795	-2.23705	-2.15383	-1.89609	-2.2224	-4.30466	0.187048	1.4056	0.0054993	linear_increasing	4.16987e-05	0.000178895
GSN	-	-5.5945	-4.24767	-5.26907	-5.07225	-4.74299	-4.27275	-5.21212	-3.71008	-6.53993	-4.94913	-5.00555	-5.95966	-5.47823	-6.2463	-4.98829	-4.89902	-5.19435	-2.56604	1.68549	-5.48848	-4.9301	-3.7244	-3.62283	-2.58571	-5.04568	-5.72015	-3.91971	-3.96417	-5.32698	1.41605	1.23651	2.00876	0.325443	1.14298	-4.6895	1.19417	-5.21426	1.34704	1.3452	-1.77735	-0.308102	-4.37249	2.65447	1.86494	8.62477e-06	linear_increasing	4.38232e-06	2.59164e-05
MAVS	-	-3.19723	-5.13749	-4.29256	-5.50048	-4.79001	-5.53295	-5.91784	-5.36896	-6.04478	-2.7227	-5.12904	-2.89114	-5.11249	-5.83692	-2.53647	-4.45038	-4.01895	-3.24791	-5.01433	-3.56455	-2.53473	-4.98735	-4.24151	-4.08014	-6.13995	-5.13397	-5.86861	-6.39535	-3.11361	-1.32382	-1.8063	-1.79717	-2.11552	-2.50665	-6.58249	-3.5001	-5.30617	-1.5481	-2.80007	-3.15914	-3.11217	-4.47087	1.64478	1.30565	0.0107743	linear_increasing	0.0110897	0.020698
PRSS23	-	-3.54591	-4.35314	-5.26788	-4.80305	-3.9468	-3.94141	-2.82816	-5.24863	-4.35127	-3.26229	-3.1081	-2.68106	-1.88315	-4.58848	-5.79838	-4.86241	-2.95258	-6.27241	-4.83387	-4.78669	-4.7416	-5.10117	-4.6015	-3.46746	-3.74488	-5.48003	-5.34311	-7.0124	-3.22984	-5.49538	-2.03157	-3.06014	0.244182	-1.46025	-1.61842	-1.34403	-6.38995	-2.41477	-1.22456	-1.66132	-2.09608	-4.38443	1.73512	1.1603	0.0390974	linear_increasing	2.88744e-05	0.000129968
RCC2	-	-2.16351	-5.46369	-2.01501	-5.92527	-3.88691	-5.14981	-4.32647	-4.75575	-8.03436	-3.15446	-4.87835	-3.6515	-1.25557	-2.6237	-2.59931	-4.59817	-4.93266	-5.26012	-5.09859	-5.53708	-3.22562	-4.11801	-3.05126	-3.27625	-4.97459	-3.76585	-5.25275	-7.02235	-4.80621	-2.58796	-2.21076	-2.96713	-4.24504	-2.21137	-4.53757	-2.2561	-2.04519	-2.32805	-2.92496	-1.88442	-2.76106	-4.24637	0.928317	1.50173	0.0960254	other_trend	0.00568152	0.0118006
ITGA6	-	-6.86314	-5.47668	-4.01499	-4.0243	-3.90785	-5.48931	-3.51386	-4.42628	-3.73738	-4.39754	-3.49912	-5.05749	-3.71494	-4.93529	-4.00808	-2.4322	-1.45832	-2.04699	-4.84379	-5.90945	-6.27184	-4.14194	-3.68872	-5.53388	-3.6899	-7.44664	-6.08822	-5.41855	-3.65555	-5.17153	-1.33984	-1.79138	-5.18709	-1.66623	-1.64893	-1.47606	-5.56648	-1.75189	-1.3407	-1.19	-2.29586	-4.49546	1.63784	1.34898	0.0144184	linear_increasing	0.000140151	0.000507288
RAB8B	-	-7.18421	-5.01136	-5.53889	-7.32514	-3.59238	-3.78815	-4.97166	-5.59836	-2.61463	-4.29824	-4.48852	-2.97943	-2.70681	-5.47063	-4.61248	-6.24876	-4.84346	-6.51442	-2.32319	-5.41683	-6.18247	-5.78142	-5.11214	-5.27147	-5.68148	-3.71921	-3.35062	-3.186	-4.10673	-2.10729	-1.56779	-1.6418	-2.13899	-1.68899	-1.85141	-1.56083	-2.25118	-1.63625	-1.83696	-1.68966	-1.78639	-4.66754	0.237601	1.41069	3.57863e-06	linear_increasing	1.74562e-07	1.58259e-06
STAT6	-	-4.29077	-4.115	-3.44033	-3.53681	-3.80016	-4.60204	-4.25882	-4.14757	-6.31346	-2.36502	-5.97816	-6.62433	-3.81429	-3.96705	-5.33556	-5.07084	-4.53527	-3.94981	-6.7657	-4.75041	-5.27283	-4.45233	-3.05739	-3.53795	-2.46259	-4.32182	-5.02311	-4.2073	-4.53582	-2.76722	-2.84619	-3.08872	-2.65872	-2.33132	-5.33922	-3.33741	-3.15994	-2.34494	-4.68132	-3.24618	-3.3034	-4.37666	0.977671	1.10553	0.0337949	linear_increasing	0.00954366	0.0182698
BST2	-	-3.75487	-3.73912	-4.06756	-5.31445	-2.63034	-4.10356	-5.45118	-4.75572	-6.56529	-5.32752	-2.34931	-4.97868	-4.16794	-3.72725	-4.93198	-3.88056	-0.426258	-4.28613	-6.37198	-3.19742	-5.31866	-3.36941	-4.60565	-4.27923	-4.62536	-4.01388	-3.33721	-6.07774	-5.56414	-1.30957	-0.204886	-1.23677	-1.16429	-0.111061	-5.1114	-0.116098	-0.357398	0.113195	-0.0864269	-0.0855934	-0.836074	-4.2176	1.57214	1.37154	0.000365551	linear_increasing	1.12517e-07	1.06531e-06
RASIP1	-	-6.0903	-3.58314	-5.62236	-5.51905	-1.57509	-4.94253	-4.90546	-5.89554	-3.29449	-3.66447	-3.51347	-4.45979	-5.96474	-3.86234	-5.73111	-6.42582	-3.34104	-4.41453	-2.81748	-7.04884	-5.50654	-6.14768	-5.69845	-3.76565	-6.53007	-5.74294	-4.41792	-2.1225	-6.02867	-5.54569	-0.700071	-1.36424	-0.506223	0.00590157	-0.676194	-0.501284	-0.60568	-0.536628	-1.22293	-0.582236	-0.668959	-4.80592	0.384476	1.38667	0.000221131	linear_increasing	2.90474e-11	8.45894e-10
TNS3	-	-5.86268	-6.21631	-5.05703	-3.98591	-1.18229	-6.36373	-2.63731	-3.43654	-3.53789	-3.7372	-4.76378	-1.31437	-2.88394	-5.44299	-2.69625	-4.38307	-4.29504	-4.01878	-2.07128	-4.96796	-7.60226	-2.64546	-2.226	-4.69677	-4.38859	-3.57943	-4.33646	-5.1061	-2.81707	-6.61077	-1.23811	-1.134	-0.959663	-1.00846	-1.42113	-1.36046	-1.27233	-1.32107	-0.999131	-0.72945	-1.14438	-4.09544	0.217467	1.56742	0.00101036	linear_increasing	8.1954e-07	6.22591e-06
LSM7	-	-2.16959	-5.64453	-4.39626	-6.25299	-1.48371	-4.15472	-3.47859	-4.35994	-3.7769	-7.03118	-3.89004	-4.04429	-5.94031	-6.27152	-4.32826	-5.59586	-3.36271	-4.66124	-5.27834	-2.89168	-4.92153	-4.86396	-3.72592	-4.61236	-3.1565	-2.7529	-6.19103	-5.39381	-5.65032	-5.18996	-1.59258	-1.94349	-1.62615	-1.83439	-5.98718	-3.76909	-2.86605	-1.07471	-2.89468	-1.78387	-2.53722	-4.5157	1.45033	1.31042	0.0568622	other_trend	0.000259199	0.000872472
PRKRA	-	-3.43679	-4.93106	-2.653	-4.75976	-1.03597	-2.77077	-4.80572	-4.58374	-4.98095	-5.10682	-5.11176	-3.51383	-4.02236	-3.63966	-4.32435	-7.40352	-2.06879	-3.32207	-3.68118	-3.92474	-4.55903	-3.99816	-2.90697	-3.4715	-4.9178	-4.71747	-5.61344	-4.89168	-0.945936	-4.4121	-1.34889	-1.46116	-6.7303	-4.01535	-1.95654	-1.71775	-1.73385	-1.49145	-2.19275	-1.54721	-2.41952	-4.01703	1.70114	1.32181	0.0685188	other_trend	0.00384457	0.00853264
C1orf198	-	-5.54252	-3.66359	-3.94655	-2.59381	-6.50728	-5.43765	-3.11652	-3.8914	-3.38671	-2.95281	-5.37625	-3.37951	-6.16181	-3.77296	-4.79383	-5.81713	-3.01921	-4.39256	-5.9629	-3.6065	-3.66376	-4.67209	-4.80126	-5.22331	-6.21346	-5.62325	-4.03682	-4.19487	-4.73973	-3.13538	-3.81506	-3.32958	-2.0628	-2.71137	-2.5203	-3.74854	-4.28416	-2.59476	-3.02099	-2.59065	-3.06782	-4.45418	0.703984	1.12241	0.0469081	linear_increasing	0.000773431	0.00221276
CAV2	-	-3.72728	-5.8946	-5.55137	-4.9372	-6.24726	-3.16259	-6.25519	-4.19431	-2.57137	-3.15815	-4.39335	-4.06233	-4.88179	-4.24885	-4.11442	-4.13042	-0.874554	-4.8572	-3.45934	-2.48494	-1.87874	-5.02529	-4.32787	-1.60334	-4.76442	-4.79042	-5.83785	-1.37402	-6.33659	-6.61718	-2.07313	-3.07561	-2.8755	-1.82632	-0.585121	-0.327764	-1.67623	-2.12191	-1.79737	-0.684429	-1.70434	-4.19207	0.929427	1.54004	0.0016149	linear_increasing	2.47489e-05	0.000115635
SFTPD	-	-4.22513	-4.66985	-3.95314	-5.38455	-6.54474	-3.76181	-4.66921	-4.33457	-5.28541	-3.86573	-3.61765	-4.89682	-4.20761	-5.40475	-4.40431	-4.86805	-0.729077	-2.72267	-0.576964	-4.38433	-3.82086	-4.85866	-3.34998	-3.81246	-5.53784	-5.90942	-4.66916	-4.42236	-6.22478	-0.523174	-0.107714	-0.803188	0.593886	0.252611	-0.698901	1.16348	-0.0598245	-0.68888	1.00752	0.819408	0.14784	-4.18784	0.734958	1.47513	3.57828e-06	linear_increasing	8.3591e-11	2.1233e-09
SLC44A1	-	-4.7266	-2.13265	-3.81384	-4.34118	-6.27371	-4.52595	-5.37585	-6.48246	-1.26059	-4.92863	-3.41435	-4.8919	-4.07758	-2.36938	-3.76839	-4.52743	-1.65456	-1.97828	-7.29159	-4.29308	-4.17107	-4.79225	-4.68623	-3.22145	-4.71259	-3.99054	-6.10295	-6.1361	-4.84756	-3.45109	-1.19573	-1.48045	-1.41344	-1.00003	-3.77155	-1.06374	-5.19812	-0.545082	-1.25122	-0.985977	-1.79054	-4.27466	1.48214	1.44631	0.0113549	linear_increasing	3.63262e-05	0.000157605
CELF2	-	-3.97668	-6.0568	-1.94501	-5.19087	-5.5202	-3.65555	-3.59462	-6.0296	-5.2913	-3.83357	-5.95405	-1.71802	-4.04201	-4.39279	-4.44244	-4.5471	-5.06054	-3.48806	-2.06213	-2.77493	-6.29132	-5.91177	-5.65319	-4.1462	-3.05145	-4.42127	-4.69619	-5.95143	-2.89553	-3.94002	-0.395851	-1.00046	-0.777151	-1.23771	-1.77564	-0.840324	-1.40847	-1.29395	-1.01732	-1.32824	-1.10751	-4.35115	0.386435	1.30191	4.52992e-05	linear_increasing	2.78548e-09	4.35259e-08
ABLIM1	-	-3.5772	-5.20098	-2.84568	-5.21956	-5.80672	-4.58283	-3.83221	-4.75094	-4.63496	-7.32407	-6.29441	-4.65514	-4.32001	-6.45519	-2.50062	-6.01142	-2.78137	-4.11111	-4.10529	-3.60755	-2.72531	-4.2995	-5.51353	-5.11495	-5.44564	-5.59539	-5.53785	-2.47015	-5.8299	-6.0447	-1.49507	-2.00892	-0.97418	-1.19764	-2.41569	-0.327616	-1.61266	-1.82822	-1.44925	-1.47838	-1.47876	-4.70647	0.573377	1.27327	0.00030354	linear_increasing	2.76641e-09	4.35259e-08
GNA11	-	-3.87829	-3.75181	-4.94184	-4.97731	-5.69428	-2.38286	-3.44152	-4.83352	-5.76653	-5.33898	-2.91446	-5.79368	-4.74897	-4.0983	-5.05673	-6.12604	-5.35083	-4.34228	-5.94604	-5.41633	-4.30713	-2.53753	-5.87746	-4.69061	-5.70175	-2.49979	-7.21416	-2.39288	-5.01676	-5.11046	-1.56063	-2.07692	-1.50322	-0.907709	-1.83358	-1.48013	-2.21685	-1.57579	-1.9707	-1.18863	-1.63142	-4.67164	0.403378	1.24141	0.000667411	linear_increasing	4.42479e-09	6.5926e-08
ANKFY1	-	-1.98157	-3.60327	-4.13536	-5.79927	-5.39669	-4.57889	-4.85275	-4.57521	-5.1759	-5.7199	-3.97582	-7.67691	-4.41359	-5.58624	-5.26315	-3.0192	-4.87837	-3.78891	-6.7594	-3.59689	-1.70741	-2.15197	-5.26108	-5.78398	-1.80941	-1.90284	-5.6687	-4.88061	-4.74632	-3.02898	-1.66977	-1.62477	-2.02587	-1.47628	-2.08932	-2.03387	-3.24345	-2.01838	-1.92366	-2.0612	-2.01666	-4.39062	0.481574	1.50462	0.000793107	linear_increasing	1.99495e-05	9.51438e-05
BST1	-	-4.66556	-5.23631	-4.37742	-5.61411	-5.11945	-4.51054	-5.81446	-3.31633	-3.78712	-5.51817	-5.21747	-4.00469	-3.5317	-5.2568	-5.6763	-3.22258	-3.37762	-5.80764	-2.19971	-4.47862	-2.52685	-3.27717	-3.45654	-4.78707	-4.46458	-5.92591	-4.48274	-4.06056	-3.81795	-2.22254	-1.95776	-2.35598	-2.79185	-1.88334	-2.30185	-1.97559	-6.49347	-2.18056	-4.0662	-0.944306	-2.69509	-4.32515	1.55052	1.08204	0.000332437	linear_increasing	0.000698297	0.00203353
ADPGK	-	-6.32876	-4.20759	-5.98874	-4.77431	-5.23936	-3.82245	-5.71648	-4.5989	-3.41007	-4.48418	-5.14192	-4.52707	-5.34047	-3.12034	-4.1656	-5.58506	-2.19026	-1.86815	-2.28873	-4.55165	-3.11793	-3.16803	-4.9663	-5.38521	-5.1011	-4.72057	-4.00255	-4.82072	-6.21306	-2.10297	-2.28577	-1.60642	-1.97335	-1.98686	-6.35356	-4.96671	-2.64052	-2.0038	-2.26125	-2.26255	-2.83408	-4.36495	1.54858	1.23804	0.00202147	linear_increasing	0.00292542	0.0067499
FBLIM1	-	-3.97869	-6.65947	-2.48915	-7.46059	-4.85962	-3.81345	-4.22719	-4.8736	-4.62058	-6.14177	-5.73876	-2.2132	-4.36183	-4.16036	-5.08871	-2.91594	-3.41945	-5.78526	-4.97871	-2.41882	-3.63847	-3.96326	-4.72294	-3.19228	-3.30307	-4.69736	-3.94068	-3.17431	-3.21137	-3.62841	-1.69189	-1.32917	-0.443657	-1.49889	1.59528	-1.50825	-0.276666	-0.793518	0.579871	-1.61501	-0.69819	-4.25591	1.08875	1.25076	2.56378e-07	linear_increasing	1.06139e-09	1.91773e-08
C11orf54	-	-2.93485	-5.87656	-1.70488	-7.24317	-5.03143	-5.47743	-5.57839	-4.53397	-3.1632	-6.93288	-3.96239	-5.23032	-6.0528	-4.99628	-4.54692	-4.26967	-0.690906	-5.69305	-2.37835	-4.37515	-4.22189	-4.00053	-3.30412	-5.73515	-4.75032	-4.28041	-5.13734	-7.39942	-3.84123	-3.97987	-1.54242	-0.494787	-0.593615	-0.852139	-1.16893	-0.685571	-0.852538	-1.01958	-1.07136	-1.05681	-0.933775	-4.57743	0.307402	1.51436	0.000146743	linear_increasing	5.31422e-09	7.73782e-08
ME1	-	-2.06694	-5.76192	-6.91316	-3.56062	-5.17143	-5.82733	-6.25816	-4.87084	-2.82687	-7.11556	-3.90017	-3.10783	-5.12729	-5.86153	-3.83095	-5.33335	-3.5659	-4.89109	-6.58477	-6.35889	-2.35054	-6.29085	-5.39296	-6.49522	-3.73909	-3.23756	-5.81692	-5.42451	-4.3806	-5.49257	-2.48972	-2.69574	-2.03444	-2.43942	-4.83314	-3.8172	-3.3499	-2.5977	-2.16591	-3.91721	-3.03404	-4.91851	0.909054	1.40106	0.0190766	linear_increasing	0.000312837	0.00102908
COPS7A	-	-4.96864	-3.22815	-3.19782	-6.27547	-4.69233	-5.59654	-4.5926	-5.38357	-4.03638	-2.68942	-5.86745	-3.80493	-3.97978	-4.99761	-5.26088	-3.51648	-3.28486	-3.64337	-4.6933	-4.88678	-4.58285	-4.71632	-6.13372	-3.94108	-4.90975	-2.64613	-5.43242	-4.0974	-5.64967	-4.58649	-3.19018	-3.21621	-3.29308	-3.36597	-3.06659	-3.15228	-3.99045	-3.26827	-5.05687	-3.17124	-3.47711	-4.50974	0.611646	0.98295	0.0528999	other_trend	0.00352314	0.00791986
LMNA	-	-4.29161	-7.5877	-6.20109	-3.20266	-4.45548	-3.87295	-6.86548	-4.76136	-4.10461	-3.28252	-5.04811	-5.32318	-5.73245	-3.07418	-5.28271	-4.56781	0.332717	-4.33946	-5.50838	-0.781545	-6.13506	-3.34346	-1.95401	-4.82617	-4.18066	-4.92741	-5.69449	-4.37355	-6.4743	-1.13296	-2.74084	-1.33082	-1.77072	-1.0052	-0.888992	-1.23981	-1.15801	-1.09724	-4.71817	-1.02669	-1.69765	-4.36642	1.19241	1.78355	0.000224924	linear_increasing	8.58191e-05	0.000334171
LETM1	-	-5.69433	-4.55065	-5.55483	-6.67758	-4.48884	-4.86464	-7.17486	-5.51453	-3.66956	-4.4926	-3.92847	-4.49163	-4.72123	-4.12499	-3.36695	-6.36952	-2.41416	-5.4706	-2.07823	-3.25903	-3.51517	-5.79168	-5.09902	-4.47318	-4.87488	-2.29322	-5.66592	-4.99874	-4.03536	-2.02396	-1.7589	-1.56777	-1.86258	-2.11688	-4.36154	-1.73869	-4.80621	-2.16787	-2.14571	-1.93726	-2.44634	-4.52261	1.14787	1.3161	1.34232e-05	linear_increasing	7.31231e-05	0.000291582
EIF5	-	-4.6904	-4.40474	-4.4996	-3.18504	-4.08967	-3.03148	-4.83821	-3.6526	-5.23546	-5.2884	-3.67577	-3.5924	-4.33681	-4.78529	-6.11819	-5.474	-1.89923	-3.07569	-1.42857	-4.42739	-5.24072	-4.83237	-2.78012	-2.96316	-5.11565	-5.42844	-4.52086	-3.76309	-1.27916	-1.71837	-1.48316	-1.15079	-1.54378	-1.50586	-1.44502	-5.38134	-3.86063	-1.11011	-1.60392	-6.24727	-2.53319	-3.97903	1.90873	1.27627	0.00189799	linear_increasing	0.00958108	0.0183232
HNRNPA0	-	0.926067	-4.60157	-5.89073	-2.60033	-4.33661	-4.09622	-4.61465	-5.24113	-4.86075	-5.71779	-5.96578	-5.68231	-4.19549	-4.73573	-5.27199	-7.09581	-0.405854	-4.52625	0.251823	-5.98013	-3.81053	-5.79062	-5.13901	-4.96569	-4.13842	-3.74495	-4.9152	-6.32052	-6.48007	-5.8684	-0.949557	-0.391114	-0.161224	-0.293056	-0.540721	-0.521258	-5.23597	-0.382983	-0.71815	-0.320639	-0.951467	-4.52715	1.52236	1.88138	0.0248349	linear_increasing	3.42402e-06	2.10254e-05
FRYL	-	-5.41524	-3.99701	-5.72444	-5.05501	-4.96879	-5.44325	-4.20307	-5.65835	-4.79091	-5.42458	-5.76358	-5.88004	-4.41458	-4.01204	-6.20698	-3.71032	-3.29639	-5.81767	-4.05235	-5.00392	-4.25692	-6.13068	-5.80902	-4.26598	-5.86382	-5.74289	-3.67649	-3.89519	-4.36379	-4.32831	-3.65348	-3.92875	-4.4996	-3.87706	-3.77144	-4.83098	-4.20883	-4.30489	-4.68037	-4.14311	-4.18985	-4.90572	0.393299	0.857925	0.00601995	linear_increasing	0.0155027	0.0272609
QDPR	-	0.536915	0.374065	-4.25237	-5.41295	-3.64359	-5.64467	-4.59752	-5.10865	-2.42829	-3.45671	-2.33857	-4.42601	-4.97504	-4.5883	-4.34397	-5.96575	-4.97799	-5.37792	-3.99389	-4.0721	-5.53335	-3.80473	-0.44213	-7.31377	-4.48864	-4.81357	-6.98445	-3.9233	-5.23581	-4.28201	0.560725	0.161678	1.07814	0.722673	0.574577	0.383277	0.558186	0.280303	-0.00802274	0.422066	0.473361	-4.18384	0.30366	1.82394	0.011601	linear_increasing	1.24631e-09	2.17765e-08
THEM6	-	-6.06677	-4.2284	-5.85745	-4.26875	-4.17991	-4.25813	-2.0611	-3.69353	-4.34254	-4.01209	-4.00039	-5.11736	-4.61116	-4.02578	-4.37458	-4.65196	-3.21136	-3.99202	-4.79428	-5.23313	-3.06122	-5.7643	-5.57287	-3.27028	-4.14654	-4.18613	-4.89569	-3.58921	-5.74673	-3.6028	-3.2421	-3.18582	-2.93512	-2.7013	-1.98708	-3.21838	-5.46466	-2.93313	-2.86587	-3.01012	-3.15436	-4.36055	0.88939	0.913763	0.00861717	linear_increasing	0.000813581	0.00229619
PLA2G2A	-	-5.37705	-3.38198	-5.66752	-1.93342	-3.45449	-4.93336	-3.87242	-3.89602	-8.27475	-3.67451	-4.89137	-4.87806	-4.53159	-5.36522	-3.9881	-1.27007	0.230992	-0.354882	-5.772	-3.09533	-4.31243	-4.10518	-5.86858	-6.39011	-5.59618	-3.79609	-5.55493	-4.35899	-3.70449	-4.17211	-0.87008	-1.9583	0.717339	-0.210504	2.00304	-0.417474	0.889623	-0.0196402	0.316713	-6.12702	-0.56763	-4.20801	2.2248	1.74676	0.000692145	linear_increasing	4.74158e-06	2.78694e-05
MX1	-	-5.69015	-6.10117	-4.10015	-4.84671	-3.72387	-4.74207	-3.92863	-5.34148	-2.65496	-5.18125	-3.47128	-4.6434	-5.3919	-4.72544	-6.15274	-4.9397	-3.92655	-4.28583	-5.97232	-3.04834	-6.26225	-4.54473	-4.79642	-3.24356	-4.83135	-2.88483	-4.77819	-4.18668	-4.9784	-2.19545	-1.89317	-1.64009	-4.64421	-1.74363	-2.30983	-2.90877	-5.25989	-3.18072	-3.03518	-0.107519	-2.6723	-4.51899	1.50091	1.05897	0.000821572	linear_increasing	0.000118145	0.000439855
AIF1	-	-4.18308	-4.95223	-6.09289	-4.43534	-3.24184	-3.36175	-5.82978	-4.01588	-4.47091	-7.13227	-4.70382	-2.64746	-5.27017	-5.05932	-4.24076	-5.3418	-1.82641	-4.74861	-1.14671	-3.78859	-6.1137	-4.1545	-3.89277	-4.38112	-5.10455	-5.45835	-6.0692	-4.67938	-4.5225	-0.87889	-1.31259	-1.46299	-1.26299	-1.50208	-1.73952	-1.46262	-4.4505	-1.58162	-1.29878	-2.5215	-1.85952	-4.39149	0.980645	1.4193	0.000134458	linear_increasing	6.68089e-06	3.78781e-05
IMPDH2	-	-3.43771	-5.66088	-6.09403	-4.90878	-2.74371	-4.19418	-6.14854	-1.60271	-3.6234	-4.05756	-5.41017	-4.37758	-6.04293	-5.5092	-4.40445	-3.97355	-1.44705	-0.83355	-0.268058	-3.39617	-3.16379	-5.61256	-4.40964	-5.11801	-3.6567	-5.50415	-6.66729	-6.90274	-4.58969	-7.27487	-0.157652	-0.112129	-0.333083	-0.00972843	-0.598256	-1.36409	-0.601512	-0.959197	-1.1024	-4.05588	-0.929393	-4.36779	1.18681	1.75818	0.0031136	linear_increasing	1.30072e-06	9.05793e-06
M6PR	-	-4.13654	-2.92009	-4.57773	-2.43492	-3.11839	-3.80647	-4.18738	-4.93845	-3.55614	-3.66592	-4.86438	-4.68194	-5.63825	-5.11611	-3.61976	-5.3526	-5.7507	-4.96985	-2.29831	-3.2803	-5.66513	-5.87931	-5.54054	-6.26814	-4.53077	-5.26137	-4.81729	-4.32924	-5.8118	-2.30066	-4.00773	-1.87357	-2.65908	-2.385	-4.17556	-2.19971	-4.24211	-2.48267	-2.29841	-1.84145	-2.81653	-4.44395	0.949241	1.13367	0.170094	other_trend	0.000223651	0.000771736
F9	-	-4.13103	-5.69211	-4.48657	-3.60829	-2.31335	-4.74142	-5.4824	-3.41243	-1.65234	-5.68842	-6.5552	-5.34728	-4.92093	-3.70115	-1.07893	-3.40407	-5.87481	-4.41037	-4.97616	-3.25241	-2.46031	-5.48345	-3.92208	-5.98957	-5.58232	-5.37683	-5.12679	-1.98075	-3.76932	-5.00449	-1.76409	-1.21501	-0.623758	-0.740201	-0.901987	-2.91692	-5.36701	-1.32395	-4.09312	-1.63931	-2.05853	-4.31419	1.58009	1.40587	0.00573697	linear_increasing	0.000128392	0.000467365
SOD1	-	-5.72175	-2.92804	-6.5015	-3.21453	-0.410178	-3.47123	-6.21156	-4.31174	-3.51564	-5.14797	-4.21076	-5.73277	-5.70176	-2.21508	-5.91216	-4.59613	1.02412	-0.987507	-6.50231	-2.76188	-3.44469	-3.373	-3.42711	-4.64961	-6.44398	-5.40803	-3.22399	-6.87691	-4.71823	-2.13209	-0.332291	0.029278	0.567797	0.791335	-3.87797	-0.186218	0.229475	0.179826	0.320989	0.237975	-0.203981	-4.09093	1.33174	1.92971	0.000953609	linear_increasing	7.95879e-07	6.07016e-06
OPA1	-	-2.92907	-4.32809	-5.28425	-4.20138	-6.22005	-3.92768	-5.6535	-5.59814	-3.90933	-4.96308	-3.69175	-3.19148	-7.19324	-5.44053	-3.7069	-4.40824	-2.55208	-2.59732	-2.45794	-4.66033	-5.82122	-2.96942	-4.71617	-4.30615	-4.28493	-3.82334	-3.61515	-4.36831	-4.88523	-3.84065	-2.37794	-2.4465	-2.6323	-2.3736	-2.49559	-3.57389	-4.04483	-2.47132	-2.88544	-2.63432	-2.79357	-4.31816	0.567311	1.13574	0.00143555	linear_increasing	0.000240369	0.000822045
PSMD10	-	-6.06722	-5.1307	-2.49696	-4.6573	-6.47895	-4.29959	-5.78837	-5.87716	-5.30334	-3.60679	-2.48551	-7.34952	-3.52512	-5.4392	-4.77391	-5.13819	-2.92694	-5.63689	-5.56183	-4.90732	-2.5628	-4.88598	-3.49092	-5.05594	-5.43016	-4.71385	-4.33176	-6.20758	-2.2233	-5.16032	-2.56398	-2.15783	-2.62052	-2.37199	-4.06925	-4.51286	-4.02442	-2.46466	-2.31228	-3.05536	-3.01531	-4.71711	0.861492	1.29574	0.00305774	linear_increasing	0.000425582	0.00132787
NIPSNAP2	-	-4.63326	-4.09025	-3.9153	-5.51154	-6.36802	-7.21032	-3.91973	-3.36964	-5.44688	-5.15257	-2.06165	-1.83524	-2.3614	-5.19335	-3.881	-7.03346	-1.24029	-3.47258	-0.59372	-4.80661	-5.50688	-5.07111	-5.55888	-5.49708	-2.53323	-5.80221	-5.07414	-2.56564	-4.37023	-1.13526	-1.16962	-0.65323	-1.46577	-1.24452	-1.99577	-1.39651	-1.45032	-1.22586	-1.13589	-1.29814	-1.30356	-4.17372	0.335688	1.74687	9.24842e-05	linear_increasing	9.07904e-06	4.8607e-05
NME3	-	-4.26037	-5.54994	-2.37398	-2.7181	-6.21529	-2.64826	-4.01644	-3.75614	-3.82504	-6.4877	-4.35376	-4.12062	-6.68733	-7.44305	-4.90632	-4.39172	-2.55851	-5.06616	-4.71881	-4.00772	-4.3029	-5.9259	-5.74751	-2.91585	-2.20394	-2.41878	-6.98838	-2.2899	-5.11593	-4.33635	-2.21892	-2.35142	-2.70063	-5.40908	-2.20252	-1.87491	-2.47985	-2.48646	-2.27162	-2.24849	-2.62439	-4.41169	1.00247	1.50377	0.0258233	linear_increasing	0.00122953	0.00325775
CDS2	-	-1.78508	-5.21665	-3.86278	-5.60434	-6.08884	-2.67471	-4.23317	-5.03149	-3.86238	-5.29501	-6.55354	-3.20719	-4.95544	-5.46148	-6.87155	-3.55364	-4.94309	-5.90045	-3.10107	-5.14682	-2.33496	-1.67006	-3.46828	-5.35496	-5.33119	-1.92174	-3.58804	-5.58957	-4.91084	-1.28687	-1.43421	-1.65909	-1.34425	-3.5943	-2.22853	-0.393275	-4.61368	-1.26936	-0.865847	-1.22321	-1.86258	-4.29351	1.29563	1.53009	0.00162429	linear_increasing	6.15669e-05	0.000251769
SCRN1	-	-3.85241	-1.95235	-3.38564	-6.07462	-6.05738	-3.77081	-3.57457	-6.34721	-1.8694	-1.75406	-2.72208	-4.29383	-3.97406	-6.32427	-4.37771	-5.50704	-2.01396	-4.8987	-6.16863	-4.43755	-3.50976	-4.33466	-5.44726	-5.00276	-4.84202	-5.60371	-3.93943	-4.02997	-6.77129	-3.95767	-4.3928	-1.71209	-1.88418	-2.18757	-0.977961	-5.92013	-2.26212	-1.76016	-3.3469	-2.46357	-2.69075	-4.35983	1.47772	1.41633	0.290648	other_trend	0.00281924	0.00652054
PGLYRP1	-	-3.90295	-2.07273	-2.14639	-4.7602	-6.0477	-4.63688	-6.04147	-4.52515	-6.28153	-5.30671	-5.50593	-1.96189	-4.92619	-4.16441	-5.10149	-4.41909	-3.16919	-3.00554	-4.15112	-7.23337	-5.70508	-3.65273	-3.21081	-4.22803	-3.62844	-6.29953	-3.68202	-5.30088	-4.32071	-1.20357	-0.549727	-0.532124	-5.33374	-0.859092	-1.78646	-1.73692	-1.37271	-0.149423	-4.48981	0.0668423	-1.67432	-4.35306	1.82625	1.43419	0.00301265	linear_increasing	2.66857e-05	0.00012241
SEC13	-	-0.707818	-4.83273	-5.23431	-5.82714	-5.51487	-3.17175	-4.1645	-4.20667	-4.14714	-3.18798	-4.21377	-0.906631	-3.60653	-5.18959	-4.87444	-5.62977	-0.885708	-3.81946	-1.12762	-3.94684	-3.75298	-3.11237	-3.45528	-4.33398	-4.99074	-3.71181	-3.82413	-7.29737	-4.89036	-3.44578	-0.536915	-0.236773	0.0661608	-0.598655	-0.697133	-0.558306	-4.68005	-0.285526	-0.291099	-0.763347	-0.858165	-3.93367	1.36594	1.51895	0.00316364	linear_increasing	1.58885e-06	1.08251e-05
ASS1	-	-3.8355	-6.65677	-0.852825	-3.9467	-5.49037	-4.98546	-4.52762	-5.04917	-5.61767	-4.89177	-5.06914	-4.46238	-5.46667	-2.28935	-5.17177	-2.20471	-1.13379	-5.85459	-1.01788	-4.6823	-4.55255	-5.5943	-5.94451	-4.26794	-4.68576	-2.96366	-4.66376	-5.65985	-4.72056	-4.02718	-0.217523	-0.433422	-0.175155	0.0734152	-0.991532	0.644058	-1.12138	-1.03335	-0.992771	-0.450711	-0.469837	-4.34288	0.575013	1.50233	7.09795e-05	linear_increasing	1.52306e-09	2.5455e-08
FCN1	-	-2.96268	-6.22047	-5.30167	-3.12243	-4.98927	-6.4195	-6.61717	-4.82608	-3.9967	-4.0926	-7.66132	-0.734027	-4.72334	-4.55306	-3.45523	-0.197041	-4.83972	-3.69975	-1.97201	-5.11679	-3.69294	-4.30382	-6.14161	-4.20407	-4.98327	-2.90814	-2.8917	-5.16986	-5.78621	-1.16884	-0.915435	-2.04776	-4.46632	-1.56042	-1.92551	-1.80485	-3.0053	-0.92626	-4.25441	-0.487226	-2.13935	-4.22504	1.36782	1.74115	0.00220443	linear_increasing	0.00142634	0.00368966
PNPLA6	-	-5.15139	-3.4784	-3.28515	-4.51239	-4.88306	-4.63959	-5.09577	-5.38065	-3.05078	-6.89318	-5.27162	-5.07652	-7.57804	-5.20974	-4.66965	-5.18725	-2.31738	-4.64326	-2.98304	-4.33075	-3.48029	-4.23966	-6.20434	-4.39899	-4.32824	-7.02721	-4.71752	-3.02051	-3.53846	-2.85923	-2.62663	-2.26714	-2.99475	-3.02461	-6.71106	-2.7212	-4.03064	-3.23764	-2.90989	-4.73284	-3.52564	-4.58174	1.32888	1.26873	0.0225179	linear_increasing	0.0300533	0.0475412
GALM	-	-3.40752	-4.54103	-6.94494	-3.51555	-4.27316	-4.12	-3.76386	-5.42022	-1.24344	-5.31682	-1.29692	-5.41883	-5.57944	-3.89343	-2.70962	-3.08382	-1.05213	-7.35161	-3.51528	-4.74472	-4.53623	-6.31803	-4.17687	-7.78809	-1.19401	-5.64582	-5.95703	-4.922	-5.78256	-4.04785	-1.31035	-0.677355	-0.923454	-1.35742	-0.87341	-1.43812	-1.18359	-1.13165	-1.31239	-1.07804	-1.12858	-4.38536	0.24299	1.76281	0.00623063	linear_increasing	1.15992e-06	8.28868e-06
CDH1	-	-4.39768	-4.93294	-0.566844	-4.2828	-4.00254	-1.34595	-6.15982	-6.43613	-5.07319	-6.04186	-3.39163	-3.85813	-3.43454	-5.64698	-4.90993	-5.13022	-1.10329	-3.22823	-4.62624	-3.72305	-7.31292	-4.45667	-4.12577	-3.59075	-4.33181	-6.54062	-5.387	-5.56143	-3.12759	-1.15967	-0.501733	-0.908129	-0.128692	-1.51465	-0.1891	-0.367796	-1.28892	-0.458943	-0.830674	-0.252055	-0.64407	-4.26287	0.475564	1.65979	0.000482082	linear_increasing	5.37766e-08	5.60884e-07
TFG	-	-5.63846	-4.29073	-1.23348	-3.97804	-3.99629	-3.65054	-5.44378	-5.50533	-3.75595	-3.92941	-5.09031	-5.281	-4.63493	-5.10213	-3.61071	-3.74393	-1.32502	-3.80844	-1.05949	-2.60001	-4.14112	-5.76205	-6.8686	-4.59204	-3.13375	-3.18816	-5.22842	-4.22485	-6.32337	-1.19106	-1.57672	-1.7548	-1.11421	-1.03086	-2.29608	-3.58421	-1.01927	-4.81392	-1.35299	-1.04661	-1.95897	-4.07771	1.28024	1.49947	0.00526306	linear_increasing	0.000282251	0.000941816
ABI1	-	-4.08538	-5.91744	-1.8546	-5.54978	-3.66225	-2.64907	-4.55158	-7.15358	-2.3902	-1.2523	-4.67044	-3.08813	-3.94684	-2.90652	-3.75905	-4.66459	-2.29875	-4.6058	-5.49332	-5.31636	-2.47034	-4.57109	-5.53325	-3.85107	-3.80868	-3.89559	-4.07069	-2.789	-4.89829	-4.24717	-0.923694	-1.88004	-1.32777	-1.34141	-6.20672	-1.6642	-1.97675	-1.61886	-1.74921	-1.76337	-2.0452	-3.99837	1.49488	1.32154	0.0155226	linear_increasing	0.000357926	0.00113708
UBA3	-	-2.00525	-2.84421	-4.91341	-3.60929	-3.55813	-6.07568	-5.78558	-3.69368	-2.55914	-4.42084	-4.75925	-5.96007	-3.87605	-4.34503	-5.47957	-5.25713	-5.0481	-2.37296	-4.47455	-5.16769	-4.13656	-3.68849	-1.75833	-5.65747	-5.45275	-4.65121	-4.9467	-4.07164	-4.73317	-6.35558	-1.80447	-1.97471	-2.17254	-2.41613	-2.11758	-2.29006	-2.29007	-1.63597	-6.32647	-2.15414	-2.51821	-4.38858	1.35864	1.21596	0.0992303	other_trend	0.000213586	0.000740996
VPS18	-	-4.12641	-4.66573	-4.8623	-4.21558	-4.03415	-5.48306	-5.3984	-3.27477	-4.51465	-4.01821	-4.18257	-3.36324	-4.85342	-4.69173	-6.52094	-4.35189	-3.81716	-6.30833	-3.56629	-6.38875	-5.47013	-3.3554	-3.61892	-3.70115	-5.47032	-4.9355	-4.91966	-4.87811	-5.95999	-3.58951	-4.65324	-3.45047	-3.26047	-2.64766	-3.81434	-4.31983	-4.64819	-3.55265	-4.1441	-3.81303	-3.8304	-4.61788	0.635045	0.939539	0.24143	other_trend	0.0186	0.0316086
NDUFA10	-	-2.06839	-4.72206	-2.03402	-6.07006	-1.77762	-6.28014	-6.92464	-5.32827	-7.14629	-4.38524	-5.35477	-1.89983	-3.57378	-5.24138	-5.21937	-4.72502	-4.58974	-6.30991	-5.87915	-4.79666	-3.55692	-2.63704	-4.41298	-3.6084	-4.68943	-4.17185	-7.59353	-3.81631	-3.7646	-2.48879	-3.35267	-1.47797	-4.14723	-1.72577	-2.1094	-2.42073	-2.17383	-2.11039	-6.79246	-1.61624	-2.79267	-4.50221	1.62792	1.59027	0.0444405	linear_increasing	0.00574456	0.011869
ATOX1	-	0.319613	-0.306169	-7.08477	-2.44663	0.332377	-5.24327	-4.05594	-2.87024	-5.89731	-3.45708	-3.87141	-2.9286	-1.49233	-4.226	-5.65653	-4.02648	-4.24974	-4.42227	-1.03942	-5.4338	-6.44556	-2.16274	-4.56104	-5.20912	-6.03084	-6.14794	-3.45106	-5.55054	-7.84401	-5.39593	-0.189664	-0.782992	0.199406	0.160539	-5.40424	-3.61631	-0.702912	0.247016	0.101617	-0.444496	-1.0432	-4.02849	1.91132	2.11977	0.449221	other_trend	0.000332163	0.00107297
SYNGR2	-	-6.35202	-4.2398	-3.70807	-4.4806	-5.8115	-3.62123	-4.05156	-2.34426	-4.37869	-2.40484	-3.54508	-4.7218	-4.16552	-6.66766	-4.97522	-1.18493	-1.66576	-1.07498	-1.55653	-1.28349	-4.16876	-2.90769	-3.29129	-4.75079	-4.51545	-4.16861	-4.97923	-5.23773	-4.93257	-0.911474	-0.69185	-0.98046	-0.652566	-0.623783	-1.19532	-0.942873	-0.697909	-0.164097	-1.12031	-5.52765	-1.25968	-3.73657	1.52857	1.57856	0.000196977	linear_increasing	0.000105107	0.000397667
DBT	-	-3.02025	-3.6638	-1.88068	-4.80981	-4.92595	-4.74293	-5.15414	-4.47731	-1.58265	-3.41617	-4.11419	-1.40589	-3.89831	-3.30728	-4.72762	-5.39135	-3.73824	-2.36573	-3.76032	-4.49057	-2.26588	-5.64931	-5.30868	-4.14877	-4.60076	-4.06929	-2.85043	-4.59588	-4.78733	-5.22918	-1.24188	-1.08593	-1.57304	-3.79748	-5.03589	-2.17571	-3.07669	-1.79615	-1.79718	-3.9133	-2.54932	-3.94596	1.3315	1.16939	0.185744	other_trend	0.0030781	0.00703461
EIF4A2	-	-4.21343	-4.74395	-5.23681	-4.29529	-4.6917	-4.77036	-2.49248	-3.27751	-4.49528	-5.62046	-4.63056	-0.942228	-3.91088	-5.71404	-5.03988	-5.19865	-0.685431	-4.37535	-0.00911525	-3.35476	-3.48316	-4.08911	-3.32224	-3.48981	-5.66802	-0.708394	-5.73917	-4.90677	-5.51779	-0.550341	0.0865115	-4.98313	-0.344209	-0.51864	-0.474133	-0.513387	-1.30101	0.0565106	-5.88331	0.628994	-1.32458	-3.8391	2.23295	1.69707	0.00238627	linear_increasing	0.000594757	0.00176136
PLBD1	-	-3.81298	-4.59762	-2.80406	-5.02723	-4.53243	-4.06561	-5.67408	-5.03934	-3.44901	-4.14127	-5.71387	-4.31218	-5.23032	-1.74389	-3.31097	-4.25039	-3.66451	-3.49748	-2.11818	-2.98651	-3.83491	-3.51943	-3.96332	-3.42313	-4.67032	-8.17999	-4.90529	-5.47007	-4.11027	-3.3034	-1.65008	2.63024	-3.51278	-2.63182	-3.60436	-2.63573	-2.90019	-3.29206	-2.85818	-2.1683	-2.26233	-4.1784	1.81915	1.225	0.00917054	linear_increasing	0.000542181	0.00163079
CEMIP2	-	-4.74876	-4.04654	-7.39543	-4.10104	-4.37023	-5.27218	-5.10451	-5.93724	-6.23651	-4.66097	-6.61853	-4.08878	-3.02141	-4.38822	-4.53528	-2.90273	-1.96942	-2.65312	-2.57348	-4.78013	-4.72768	-5.57665	-6.5465	-1.61583	-4.37512	-6.31092	-5.2969	-2.20367	-5.01585	-4.10783	-0.946825	-2.10834	-2.17607	-2.49303	-4.60728	-0.883852	-2.76907	-3.5856	-1.70844	-0.522535	-2.18011	-4.50605	1.26876	1.45328	0.000127124	linear_increasing	6.01778e-05	0.000246614
DSP	-	-4.61711	-2.5632	-2.20727	-2.19978	-4.03717	-6.51657	-4.32534	-8.27793	-5.25035	-3.89461	-3.28497	-4.7177	-2.20644	-3.69333	-2.2481	-3.53976	-5.04692	-2.22041	-2.02464	-2.44086	-6.21086	-5.06745	-6.94393	-2.26393	-4.29274	-4.22375	-4.59345	-3.19676	-4.41823	-5.49431	-2.23017	-1.96998	-2.33104	-2.44183	-2.22541	-2.37489	-6.38723	-2.28554	-2.15211	-2.06526	-2.64635	-4.06726	1.322	1.60326	0.122799	other_trend	0.0158743	0.0277872
PLPBP	-	-5.19482	-5.29863	-4.15133	-3.84402	-4.22953	-2.67229	-3.07893	-2.56345	-2.52408	-7.08866	-4.86893	-2.12622	-5.14645	-4.74879	-4.88732	-6.26724	-2.01501	-3.1532	-2.25531	-5.28157	-6.35974	-4.68996	-3.07759	-7.21436	-5.77261	-5.75892	-3.89668	-3.83382	-4.95393	-5.61	-2.05634	-1.72946	-1.40786	-1.69646	-4.13235	-2.12355	-5.22019	-1.80671	-1.60915	-1.80196	-2.3584	-4.41878	1.26472	1.47112	0.0714752	other_trend	0.000318047	0.00103432
DNAJC5	-	-5.55726	-5.82283	-4.14824	-3.59007	-3.82829	-3.05961	-3.8012	-5.65016	-0.823336	-2.28671	-2.19166	-5.76791	-2.201	-5.33012	-1.81595	-3.50074	-3.88355	-4.4712	-2.15584	-4.41601	-2.13599	-7.15271	-4.0766	-5.28236	-2.96375	-4.75616	-7.20984	-5.13884	-5.72955	-1.84136	-2.06748	-2.13472	-2.33202	-1.91793	-2.14569	-4.63249	-3.4181	-1.58572	-2.23132	-1.86258	-2.4328	-4.01963	0.911209	1.64862	0.0966208	other_trend	0.00643673	0.0130088
PPP1R14A	-	-4.96671	-1.59361	-1.62804	-2.10858	-3.48672	-4.08971	-4.25277	-6.71124	-4.42085	-5.48769	-2.40851	-5.66306	-5.24238	-5.3474	-4.38113	-6.14811	-1.77816	-5.79383	-4.70771	-3.86272	-5.93642	-3.40467	-4.22785	-2.91171	-4.78285	-1.2994	-3.46396	-5.53779	-5.52104	-5.21185	-1.15299	-1.45392	-0.251245	-0.777895	-0.423316	-0.88538	-5.4126	-0.409987	-0.321204	-0.759485	-1.1848	-4.21255	1.53411	1.51341	0.0190954	linear_increasing	3.12116e-06	1.93512e-05
EPS15	-	-2.52502	-5.64716	-7.03077	-2.2418	-3.12997	-6.94771	-4.58864	-3.94164	-4.28954	-5.03514	-4.18242	-2.00339	-6.13255	-4.01708	-3.88767	-2.41515	-2.58732	-2.5316	-6.63756	-4.23959	-2.88796	-6.01692	-6.46146	-3.53758	-4.81467	-3.9976	-5.03062	-3.67859	-5.87881	-4.55338	-1.95971	-1.64616	-2.29852	-1.97048	-4.03331	-1.75463	-3.36025	-1.33969	-1.95717	-1.68021	-2.20001	-4.36231	0.843385	1.48184	0.0108674	linear_increasing	9.5563e-05	0.000365881
SLC27A3	-	-3.75483	-4.65629	-3.49324	-3.81168	-2.84432	-5.31528	-4.52886	-6.49596	-4.87015	-4.6386	-6.44275	-2.97653	-4.62505	-4.95376	-3.84317	-3.8372	-2.35209	-7.42084	-3.50514	-4.91335	-4.07184	-6.49177	-6.28876	-4.94023	-4.04829	-2.59791	-5.97157	-2.75019	-3.72047	-3.03532	-1.93394	-0.851739	-2.46216	-2.78051	-1.55928	-1.69914	-2.03554	-2.4478	-2.43144	-1.61805	-1.98196	-4.43985	0.573582	1.31758	0.000418532	linear_increasing	1.54835e-06	1.06283e-05
NAE1	-	-1.38818	-5.75647	-6.209	-2.59167	-2.71543	-5.56467	-3.44859	-5.60627	-5.33113	-4.87605	-4.10568	-4.20083	-4.04814	-4.90891	-5.07747	-5.31137	-2.88391	-6.10192	-3.42125	-2.32809	-3.50881	-5.19171	-5.52708	-3.82009	-6.91942	-2.70772	-3.79811	-6.10657	-4.09624	-3.84155	-2.56625	-2.64845	-4.58442	-2.69646	-2.35814	-2.69022	-6.12377	-2.34325	-2.49182	-2.27945	-3.07822	-4.37974	1.26173	1.35509	0.134513	other_trend	0.0110213	0.0206061
LSM2	-	-4.15463	-4.65139	-3.06354	-2.59343	-2.3225	-3.44411	-6.4139	-4.10969	-4.29395	-2.20677	-6.30522	-3.85509	-6.13246	-4.50584	-2.23877	-5.76748	-3.90637	-4.41933	-2.39004	-4.09526	-4.32834	-4.65592	-6.21728	-2.49622	-5.5227	-4.23316	-5.31344	-5.01888	-2.52131	-1.87976	-3.09015	-2.36921	-2.12948	-5.12111	-2.3432	-1.8489	-2.07056	-1.75468	-1.97406	-1.89461	-2.4596	-4.10189	1.01039	1.36382	0.0306881	linear_increasing	0.00124138	0.00328127
PSPC1	-	-6.14783	-3.59204	-1.29462	-3.22667	-2.0749	-3.704	-7.01013	-5.59499	-4.02426	-4.08498	-5.25885	-1.87883	-3.41246	-5.19909	-5.00202	-7.21061	-2.02969	-4.98621	-1.8216	-3.73107	-4.22741	-6.03991	-5.10486	-2.81067	-5.24446	-5.72704	-2.3733	-4.1684	-3.72108	-3.12796	-4.19072	-1.17567	-1.02164	-2.12904	-1.64632	-1.26816	-6.14892	-2.0242	-4.44463	-2.26226	-2.63116	-4.12766	1.71234	1.56864	0.0782035	other_trend	0.0147336	0.0261235
HGS	-	-3.69645	-5.46452	-0.57829	-4.95641	-2.07888	-4.54811	-5.21438	-4.3046	-5.29558	-3.72784	-4.8896	-2.33984	-4.10161	-4.61532	-3.45341	-4.38733	-1.47477	-4.24237	-1.63683	-4.30001	-4.97415	-5.18657	-5.72453	-5.68121	-5.78981	-2.30069	-4.25343	-6.83366	-5.10279	-4.34364	-2.09474	-2.3943	-2.05894	-2.23059	-2.33038	-2.28671	-2.00795	-2.6019	-2.42647	-2.13777	-2.25697	-4.18322	0.18717	1.45431	0.107912	other_trend	0.000185124	0.000651665
PLCD1	-	-4.55142	-0.998244	-2.42426	-4.92005	-1.78432	-4.94421	-4.34729	-6.24546	-5.97254	-2.08619	-4.33028	-2.94198	-4.19179	-4.29826	-5.10237	-5.30122	-4.59842	-1.48109	-3.71615	-4.70323	-1.78248	-6.76244	-4.77477	-5.85672	-3.97162	-5.94622	-4.21524	-4.66494	-4.84126	-2.97102	-1.78592	-1.94537	-1.91958	-1.62706	-1.38706	-1.72578	-5.58723	-1.53751	-2.08176	-1.28771	-2.0885	-4.15752	1.25446	1.49248	0.0924849	other_trend	0.000341483	0.00109938
UBE2L6	-	-4.53309	-4.12441	-4.37545	-5.10172	-1.86876	-5.17239	-5.18773	-6.49713	-4.1028	-4.25136	-4.03114	-1.79426	-3.2241	-5.03001	-4.38222	-4.87078	-3.70562	-5.65222	-2.60606	-2.10419	-6.31858	-2.56105	-3.6952	-4.14821	-4.38777	-1.9811	-4.52902	-3.50714	-5.82046	-2.32216	-2.0935	-1.08791	-1.80281	-1.55625	-4.65883	-6.10904	-2.11412	-1.61243	-1.54361	-1.15153	-2.373	-4.06287	1.65765	1.30516	0.00732014	linear_increasing	0.00203119	0.00500505
YAP1	-	-4.36588	-2.23585	-4.76302	-4.8581	-1.29779	-3.79466	-3.78704	-7.5549	-5.31024	-1.77738	-5.32654	-5.50025	-5.11211	-6.83364	-3.91385	-4.27004	-6.41728	-4.46359	-1.90818	-4.6438	-4.0056	-4.85188	-2.25167	-1.51692	-5.39794	-1.83798	-5.54975	-8.28648	-1.71611	-3.99453	-1.66072	-2.49204	-1.68571	-1.69804	-1.83139	-1.8365	-5.37646	-1.69443	-1.62028	-5.53808	-2.54336	-4.25143	1.55656	1.82062	0.055847	other_trend	0.0115136	0.0212985
MPC2	-	-2.49249	-5.41995	-3.58696	-6.76252	-1.51454	-5.55827	-2.5118	-6.86869	-5.93605	-5.84025	-4.83212	-3.83482	-3.76326	-6.75027	-4.02	-3.19579	-1.77401	-6.54394	-2.11646	-5.65302	-3.71949	-4.51307	-3.36464	-2.67405	-5.14206	-5.50945	-5.56532	-3.58195	-3.61886	-1.5777	-2.10364	-1.90362	-2.09991	-5.06704	-2.05026	-2.18345	-2.56171	-2.13383	-2.45919	-2.18457	-2.47472	-4.27473	0.930812	1.63401	0.00533904	linear_increasing	0.00215749	0.00525564
ACADS	-	-5.14116	-3.76477	-5.41262	-5.25419	-1.08846	-5.51695	-4.94456	-4.17013	-1.66971	-4.27273	-4.8254	-2.0759	-4.2793	-4.51647	-4.64634	-6.39313	-2.23882	-5.30511	-4.96847	-2.77857	-4.6683	-5.14109	-4.47101	-5.55594	-6.58598	-3.32778	-3.71219	-4.35158	-6.79178	-3.05563	-1.42115	-1.67016	-1.30585	-6.44205	-1.40893	-0.898989	-1.46839	-1.74007	-2.79396	-1.06068	-2.02102	-4.36414	1.63563	1.39807	0.0269853	linear_increasing	8.43162e-05	0.000329382
NDUFA8	-	-1.57565	-4.9612	-4.40717	-3.96754	-1.32361	-6.16304	-5.03553	-4.00542	-4.98935	-7.95214	-6.63642	-2.10777	-5.58972	-4.12331	-2.69451	-3.86047	-3.09374	-5.1565	-3.74289	-6.63236	-6.19306	-4.95997	-4.00958	-3.2818	-5.72777	-2.63759	-4.16758	-3.77894	-4.08804	-5.20614	-3.28029	-1.16311	-2.64798	-2.18495	-2.37692	-2.46265	-2.76078	-1.88232	-1.85773	-1.90443	-2.25212	-4.40229	0.5903	1.53359	0.0174617	linear_increasing	0.000115662	0.000431684
NDUFAB1	-	0.415754	-1.00213	-1.95087	-6.1369	-5.49921	-4.67238	-3.66705	-5.26182	-1.02981	-4.87324	-4.31725	-5.59822	-6.12822	-4.18533	-5.85669	-4.21552	-4.49739	-1.2458	-0.0415065	-4.27938	-5.9643	-2.98287	-3.58696	-2.40203	-3.09648	-4.79482	-5.54371	-4.0639	-5.05385	-1.95946	-0.965715	-0.473888	-0.948925	-0.76223	-4.28582	-0.909169	-1.33069	-0.849148	-2.57949	-0.530308	-1.36354	-3.78304	1.1864	1.8648	0.0560703	other_trend	0.000460928	0.001422
EXOC7	-	-3.87576	-5.60842	-6.31176	-5.06191	-5.59487	-2.69111	-6.11363	-4.19422	-2.99234	-2.68529	-3.94227	-3.20318	-4.66548	-4.17623	-2.61018	-4.32016	-3.2853	-4.29412	-3.30101	-7.04769	-4.97096	-3.65469	-5.049	-5.0379	-4.34362	-5.86342	-7.74639	-4.20514	-5.21802	-2.85414	-2.57688	-2.97632	-2.79435	-2.48498	-2.81883	-2.98804	-2.6984	-2.81226	-4.77965	-2.63775	-2.95675	-4.49727	0.660471	1.31813	0.0235793	linear_increasing	0.00111019	0.00299518
EPS8L2	-	-4.24079	-5.18976	-4.86777	-1.63998	-5.51983	-4.75986	-6.12849	-3.78631	-4.94915	-2.40663	-4.52679	-1.76914	-4.70758	-5.75774	-3.87866	-3.81501	-2.07209	-4.2297	-2.43767	-2.31967	-2.62682	-5.23571	-4.63548	-6.81092	-5.49311	-2.17609	-6.33738	-4.02786	-5.77567	-1.66511	-0.816307	-2.0325	-1.11372	-0.987358	-2.14096	-1.02665	-6.09522	-1.13074	-1.52029	-1.03637	-1.79001	-4.12623	1.57849	1.52555	0.00448781	linear_increasing	0.000175544	0.000619075
NEBL	-	-4.65622	-3.3808	-2.3653	-5.97033	-4.9539	-4.49013	-4.5272	-3.85706	-2.70042	-4.37957	-3.95313	-3.83809	-5.77243	-5.9992	-4.22824	-4.90828	-2.32337	-3.79437	-3.2834	-3.47786	-3.44464	-3.00631	-4.67267	-3.55942	-3.09851	-5.20036	-5.28248	-4.8312	-3.26668	-4.25747	-1.41217	-1.91323	-1.55726	-1.57044	-1.54257	-0.71701	-1.99662	-1.3784	-0.895522	-0.788294	-1.37715	-4.11597	0.445225	1.00113	8.22091e-05	linear_increasing	4.29528e-10	8.9734e-09
CHCHD3	-	-1.10379	-4.56648	-3.16133	-4.99756	-5.11686	-1.41477	-4.70542	-3.31811	-4.38682	-1.1115	-5.00127	-4.08734	-3.71293	-3.08295	-3.68945	-4.90002	-0.781464	-5.37811	-1.35908	-4.44203	-1.18464	-4.94034	-5.28574	-4.49519	-5.38836	-4.6017	-4.55661	-6.21319	-6.8306	-3.33578	-0.646255	-0.586632	-0.934986	-0.803233	-1.31758	-0.247443	-0.881117	-0.912467	-1.05525	0.121714	-0.726325	-3.90498	0.41369	1.62365	0.0251752	linear_increasing	4.47291e-07	3.72162e-06
CSNK2B	-	-3.74274	-2.41161	-2.26696	-5.91805	-4.91494	-2.47619	-5.28851	-4.41821	-3.24537	-2.0725	-3.86637	-6.11436	-5.1019	-3.05743	-5.31538	-4.02245	-3.84703	-2.65041	-2.57739	-2.48369	-5.094	-4.59256	-2.97443	-4.30746	-4.40771	-3.41046	-5.25623	-4.56244	-3.85073	-5.8013	-1.91657	-2.17192	-6.38468	-1.91444	-2.59732	-2.03418	-4.77887	-1.45249	-2.10653	-1.42971	-2.67867	-4.00163	1.61176	1.19495	0.288799	other_trend	0.00852187	0.0165612
STRAP	-	-6.4582	-5.53151	-1.46087	-5.08256	-4.79164	-5.03124	-3.2152	-6.79712	-3.50912	-4.05618	-4.34071	-4.53318	-4.09502	-4.1861	-3.68805	-4.38794	-1.53173	-3.97691	-1.09331	-2.07878	-6.63517	-3.92103	-2.78058	-5.7266	-2.00028	-5.55175	-5.51775	-4.57708	-3.37962	-1.38607	-3.22131	-1.45647	-1.62332	-1.28834	-1.60111	-1.58596	-1.92708	-1.56338	-1.45075	-0.86321	-1.65809	-4.04404	0.613444	1.58579	0.000130119	linear_increasing	4.44149e-05	0.000188862
HEBP2	-	-4.01647	-5.65304	-0.600462	-4.89577	-4.11419	-2.70487	-4.91324	-5.16568	-4.22401	-4.78381	-4.03335	-1.76503	-4.5455	-3.07867	-4.29716	-3.504	-0.487274	-0.923528	-1.06203	-5.09664	-5.2883	-3.82608	-4.22896	-0.976627	-4.36238	-4.18049	-6.17535	-0.957672	-5.17872	-6.14177	-1.00201	-0.782803	-1.3043	-1.1186	-0.0654519	-0.362997	-0.881529	-0.806732	-1.20224	-0.63657	-0.816323	-3.70604	0.38297	1.72381	0.00230695	linear_increasing	6.7621e-06	3.80022e-05
SH3GLB1	-	-3.98504	-5.21826	-2.08692	-4.82714	-4.07788	-0.776448	-3.51585	-2.16625	-4.63705	-6.40694	-5.71517	-1.34769	-4.33799	-3.94915	-5.25446	-2.04866	-1.21759	-3.16214	-1.14088	-3.78791	-3.8283	-5.18847	-0.767214	-3.33947	-5.77699	-6.1368	-4.53619	-2.53799	-4.64814	-4.56248	-0.686808	-0.963394	-0.5493	-0.772962	-1.66528	-1.37203	-1.21183	-0.762709	-1.07478	-1.53581	-1.05949	-3.69938	0.379119	1.64697	0.00441368	linear_increasing	1.39552e-05	7.00312e-05
DYNC1I2	+	-5.03036	-4.18237	-1.69702	-1.05924	-3.96099	-5.65662	-4.47368	-4.61723	-4.00763	-5.5712	-4.14845	-2.50335	-2.9625	-4.26834	-3.95711	-5.73006	-0.673909	-4.48398	-1.02892	-2.45964	-3.77724	-2.4241	-5.27339	-1.22702	-4.25527	-4.63463	-3.8589	-4.79637	-5.37848	-0.724352	-1.01447	-1.15201	-0.865262	-0.863782	-0.0749387	-0.580063	-5.9007	-1.06749	-0.344423	-0.911229	-1.27744	-3.62741	1.65937	1.56691	0.00340909	linear_increasing	0.000243821	0.000830894
CST3	-	-0.810621	-6.34065	-0.915505	-5.59553	-4.44994	-6.57532	-3.20291	-4.73445	-1.13847	-5.23201	-6.26251	-5.0671	-4.13379	-3.12623	-6.45487	-3.53511	-1.7652	-1.47662	-2.68521	-6.48049	-5.67435	-4.60428	-5.68165	-4.4661	-3.49863	-3.84885	-4.84385	-4.63206	-3.36835	-3.81206	-1.82889	-1.00903	-1.61878	-1.35386	-3.47261	-1.12291	-1.07019	-2.98518	-1.38849	-8.02638	-2.38763	-4.14709	2.14828	1.71541	0.0646577	other_trend	0.012048	0.0220536
TST	-	-1.64952	-4.61907	-4.31311	-3.81277	-3.38865	-3.92179	-4.5162	-3.07911	-4.45399	-1.15371	-3.7072	-5.79103	-4.1581	-5.20317	-3.79785	-5.33297	-5.30123	-5.87369	-1.36587	-4.47282	-2.40836	-3.66429	-3.48	-3.32355	-2.05576	-5.2525	-5.7751	-2.42396	-5.26423	-0.959424	-0.539657	0.510101	-1.15995	-1.25194	-0.559205	-1.14601	-2.40557	-0.541453	-0.645071	0.345562	-0.73932	-3.8173	0.832658	1.42626	0.000470772	linear_increasing	1.44981e-07	1.34615e-06
EHD3	-	-2.18369	-4.6563	-4.65239	-3.57006	-3.00109	-6.42418	-2.56465	-3.40388	-5.63347	-2.60798	-2.10099	-4.64515	-5.28387	-4.18574	-5.44253	-4.33171	-1.2766	-3.62661	-1.96873	-4.85108	-4.54195	-5.84849	-3.718	-3.62243	-3.82088	-4.82687	-2.78928	-2.0094	-5.4859	-1.39653	0.633391	-1.34743	-0.100977	2.32753	0.162649	0.704671	-0.0426007	1.04463	1.04394	-0.148536	0.427726	-3.81568	0.974269	1.39683	1.86926e-05	linear_increasing	8.39598e-11	2.1233e-09
ENPEP	-	-2.89838	-5.55378	-5.41328	-4.54536	-3.25633	-3.40598	-5.76494	-4.74436	-4.50532	-5.20944	-6.85984	-6.41039	-3.30041	-5.19603	-5.18495	-4.61906	-2.3475	-5.98757	-3.24384	-2.22705	-4.81862	-1.96058	-5.2696	-5.91173	-4.56894	-3.41308	-6.38036	-5.45685	-2.09031	-3.76573	-1.6873	-5.88341	-2.44044	-5.30495	-1.79651	-1.38463	-1.33746	-0.347621	-2.21191	0.520235	-2.1874	-4.47699	1.99806	1.38635	0.00775087	linear_increasing	0.000252887	0.00085723
JCAD	-	-3.62171	-5.23565	-6.91616	-5.21132	-3.09945	-3.94164	-4.30883	-3.80146	-4.69807	-2.67211	-4.02427	-4.80192	-4.89069	-4.96798	-4.16248	-4.68739	-3.04091	-4.98819	-3.53505	-3.10534	-5.31991	-4.57897	-4.82692	-5.95386	-4.34447	-2.96455	-7.33924	-4.37341	-4.50611	-3.14753	-2.8063	-2.50718	-3.11711	-2.89504	-6.15629	-2.07992	-4.49879	-1.95372	-2.37576	-1.96923	-3.03594	-4.43552	1.32892	1.09826	0.0276216	linear_increasing	0.00203553	0.00500934
MGST1	-	-5.6309	-5.15756	-2.72687	-4.81822	-0.919415	-5.23246	-4.64607	-6.29354	-0.16928	-4.98851	-1.25904	-6.90319	-5.2095	-4.45322	-3.0945	-4.39722	-1.07176	-5.18693	-4.4654	-3.71028	-0.907411	-2.61201	-3.87588	-6.25325	-5.20914	-5.32698	-3.23864	-4.48589	-3.34421	-0.0381893	0.593239	0.0949997	0.17061	-0.0460234	-0.509641	0.243228	0.161092	0.208998	0.232371	0.129189	0.127806	-3.85418	0.276496	1.89017	5.00996e-05	linear_increasing	9.0817e-08	8.81567e-07
NPEPL1	-	-2.65822	-2.45516	-3.7993	-3.12934	-2.67276	-6.85585	-3.38501	-6.22199	-6.00735	-2.57144	-5.4963	-2.30748	-3.84841	-6.84161	-5.77661	-5.99635	-5.84264	-5.62454	-4.08868	-5.94941	-4.08266	-4.83939	-4.11946	-3.08655	-3.49895	-4.69371	-2.49616	-5.72801	-4.95185	-2.84318	-4.34429	-2.36362	-2.10001	-2.68164	-5.47499	-1.27673	-4.13212	-1.93191	-2.65207	-1.79003	-2.87474	-4.39561	1.33622	1.457	0.202455	other_trend	0.00594943	0.0122036
UBA2	-	-4.75559	-3.3341	-4.08061	-5.87278	-1.99668	-3.38522	-6.28432	-5.04001	-1.60878	-3.88413	-2.24918	-3.92586	-4.58056	-3.50038	-4.91365	-4.41736	-5.3432	-5.36002	-1.75125	-3.82519	-2.14074	-3.94479	-2.50989	-4.41787	-5.63307	-2.57054	-3.95897	-5.60911	-6.22833	-1.98478	-1.53467	-1.49911	-1.64206	-1.6342	-1.76995	-1.79333	-2.30817	-1.50705	-1.64322	-1.65721	-1.6989	-3.97023	0.235966	1.39598	0.00448435	linear_increasing	1.03976e-05	5.44526e-05
EMD	-	-0.0551685	-3.60131	-0.573505	-3.97948	-0.167281	-4.8528	-3.69058	-4.54182	-3.41171	-2.59858	-4.14609	-0.398748	-5.30837	-5.06207	-4.00633	-3.43618	-0.84292	-5.30096	-1.57274	-6.16468	-5.61364	-6.72783	-5.08264	-4.15834	-5.87136	-5.53029	-4.39438	-3.16629	-3.40028	-5.43409	-0.619719	-0.530463	-0.603477	-0.554429	-0.461017	-4.24818	-3.35102	-0.719502	-0.663134	-0.898542	-1.26495	-3.76968	1.35769	1.88208	0.392398	other_trend	0.000413104	0.00129103
ATP5PF	-	-5.02468	-0.605043	-0.492151	-3.81867	0.119901	-4.46107	-4.67598	-4.62985	-5.29267	-5.06655	-5.04206	-0.319254	-4.08007	-3.95067	-2.79559	-4.49297	-3.7589	-4.26305	-0.0235421	-3.99074	-5.0198	-5.98318	-4.48247	-6.40079	-5.69838	-4.79166	-4.64942	-4.75911	-2.26611	-0.888957	-0.556046	-1.19546	-0.801938	-1.15183	-0.170588	-1.80835	-1.47941	-0.363706	-1.58524	-1.12304	-1.02356	-3.72012	0.540137	1.89238	0.0377721	linear_increasing	8.17787e-05	0.000320773
SEC11A	-	-2.55378	-2.53846	-2.95721	-3.60786	-5.39826	-2.44443	-3.01789	-2.63166	-2.29275	-4.73843	-0.530947	-2.32182	-3.17776	-3.90287	-3.39399	-4.47053	-2.88482	-3.53949	-4.42268	-5.20884	-4.42905	-4.50343	-5.9206	-4.43663	-5.82654	-7.0924	-5.64638	-3.88211	-2.47141	-4.78923	-1.56987	-0.989341	-1.62297	-1.73686	-3.61612	-1.76951	-2.34939	-1.7031	-3.94642	-1.8664	-2.117	-3.83441	0.9406	1.40735	0.478577	other_trend	0.000946014	0.00261241
ATP5MD	-	-5.69816	-3.38875	-3.67849	-3.88701	-4.71897	-5.35414	-6.64125	-4.76365	-4.07539	-2.5889	-1.84789	-3.1523	-6.04531	-2.20747	-5.35871	-0.615298	-1.62163	-5.55772	-1.68855	-6.0555	-1.7234	-3.81705	-5.21653	-5.1312	-4.64444	-5.65644	-3.37707	-6.20389	-2.57257	-1.46734	-4.50818	-0.721787	-1.22043	-4.36786	-1.1055	-0.355185	-3.55187	-0.926148	-0.971584	-0.626538	-1.83551	-3.9585	1.6289	1.6995	0.00919747	linear_increasing	0.00137022	0.00356368
NDRG2	-	-1.67488	-4.59623	-4.33554	-4.67038	-3.96561	-4.8316	-3.82015	-2.72434	-5.32288	-4.39	-5.03829	-2.02677	-1.97036	-5.75789	-5.0621	-5.45286	-0.543537	-1.35911	-3.04135	-5.84936	-7.82221	-6.06719	-3.34963	-3.11276	-3.3036	-2.03689	-4.06104	-4.85049	-5.14277	-3.30533	-1.22606	-1.44699	-1.38914	-0.874419	-0.523024	-1.09308	-1.32745	-0.917274	-1.09025	-1.04278	-1.09305	-3.98284	0.277237	1.62095	0.00274328	linear_increasing	2.25899e-06	1.43768e-05
GOLPH3	-	-4.21213	-3.16052	-3.56377	-6.03361	-4.8835	-5.536	-6.4436	-4.564	-5.45815	-4.24031	-4.81643	-3.68283	-4.70887	-4.68872	-4.62861	-5.7345	-3.26965	-5.8463	-2.31433	-4.73565	-4.21348	-5.23041	-5.50771	-4.38029	-3.51476	-6.69266	-4.73767	-5.73171	-6.33206	-4.39536	-3.75537	-3.61116	-3.18808	-3.28556	-4.68649	-3.82422	-5.34952	-3.2245	-3.84956	-3.00385	-3.77783	-4.77525	0.732333	1.04604	0.231462	other_trend	0.00830322	0.0162018
SMC2	-	-4.97543	-4.98053	-3.66824	-0.119253	-3.8352	-3.59144	-5.55409	0.271694	0.160363	-0.27511	-5.36756	-2.40985	1.42168	-4.60262	-4.44282	-3.93881	-6.47366	-3.61213	-6.24887	-3.36913	-0.477543	-3.70137	-6.92566	-5.1394	-3.7413	-3.94857	-6.25353	-3.51473	-4.29605	-4.50063	-1.54942	-3.86879	0.0942623	-0.286085	-6.57401	-0.931551	-0.420196	-0.870128	-1.32947	-1.60363	-1.7339	-3.60366	2.02081	2.18591	0.45362	other_trend	0.0222287	0.0367672
GNB4	-	-2.79294	-5.77592	-7.36625	-2.06029	-3.68864	-4.84029	-2.64606	-4.44959	-1.98271	-2.46489	-4.02129	-1.99673	-5.89811	-5.49158	-4.01988	-5.85862	-1.68609	-1.67534	-2.03444	-4.72558	-5.5924	-5.30549	-4.95908	-6.58655	-6.6185	-6.28942	-7.10177	-4.89703	-3.66056	-5.33258	-1.44978	-0.589758	-1.06056	-0.783051	-1.24866	-0.979014	-0.948216	-0.993611	-0.988164	-0.565812	-0.960662	-4.39395	0.270701	1.75206	0.0145909	linear_increasing	3.89194e-07	3.33942e-06
COLGALT1	-	-3.9727	-2.84402	-2.59558	-3.59665	-3.8765	-5.11927	-4.2493	-3.68331	-2.22933	-2.69869	-6.28787	-2.0838	-4.76007	-3.87743	-2.36654	-5.79129	-4.98191	-6.01299	-1.84235	-5.09242	-1.96776	-5.36108	-5.02502	-3.7778	-4.89449	-4.1255	-4.84902	-7.6269	-5.85941	-1.89012	-1.77853	-1.18199	-1.76985	-2.16896	-4.03368	-3.82628	-6.22474	-2.38096	-1.74777	-2.29137	-2.74041	-4.1113	1.52501	1.50038	0.447909	other_trend	0.0171609	0.0295814
HPGD	-	-6.95658	-6.92649	-4.87042	-5.03034	-2.26396	-5.03659	-5.08733	-4.71184	-1.58967	-6.68216	-2.84498	-5.84037	-3.25829	-5.06843	-4.62587	-6.33122	-0.455084	-0.974361	-1.43185	0.0361023	-4.2069	0.564631	-4.14188	-4.72313	-4.71468	-5.83114	-3.0997	-5.22413	-3.93176	-0.126878	0.305335	-0.976471	-0.185903	0.790017	-1.76264	-0.0847822	-0.987295	0.202314	-0.332474	0.43605	-0.259585	-3.84618	0.779033	2.17067	6.22879e-06	linear_increasing	1.03617e-05	5.44131e-05
CD36	-	-0.814789	-4.03191	-5.90359	-3.6023	-1.86693	-4.07185	-3.35642	-5.12602	-2.52367	-3.84219	-4.05856	-4.21441	-2.53804	-3.69599	-3.67591	-4.2164	-1.21311	-3.44414	-3.88424	-4.93214	-3.03596	-3.32576	-3.94364	-1.26116	-3.62328	-2.86477	-4.86199	-7.2475	-3.19844	-4.89229	1.37808	0.944612	-0.936734	0.971228	-0.197674	0.0365777	0.240603	0.964738	1.59774	2.02295	0.702212	-3.64225	0.904018	1.35146	0.000392544	linear_increasing	1.63691e-11	5.07442e-10
ABCA8	-	-2.39453	-3.39067	-4.36825	-3.16414	-3.07096	-3.79487	-6.4196	-2.76561	-3.81369	-4.47127	-3.5249	-1.96319	-5.21737	-6.08207	-5.80663	-5.76846	-3.18557	-2.72008	-3.45	-2.48199	-3.99236	-3.65848	-6.1048	-5.80837	-4.46709	-2.88407	-4.73806	-5.36079	-4.71208	-4.33644	-2.59242	-2.80443	-1.81547	-2.39862	-2.44638	-2.97734	-2.35422	-2.41196	-2.73811	-2.45332	-2.49922	-4.13055	0.315996	1.25396	0.161706	other_trend	0.000251721	0.000854992
ARL8B	-	-0.927602	-1.15913	-5.23681	-3.4237	-1.34109	-2.21893	-5.91445	-5.41551	-4.0681	-5.91817	-5.03591	-3.58326	-4.79224	-5.86493	-4.35277	-4.10066	-1.12228	-5.23805	-0.312819	-5.08135	-5.39409	-5.66916	-5.84877	-1.11631	-4.22747	0.596321	-3.43973	-3.7277	-4.22027	-0.652012	0.0355519	1.05492	0.176638	0.296044	-0.762384	-0.461414	0.076464	-0.0880114	-0.474833	-0.162091	-0.0309113	-3.6269	0.50364	1.98393	0.000711886	linear_increasing	1.85404e-06	1.22036e-05
PLEK	-	-1.02704	-2.57311	-3.73767	-6.33966	-2.27457	-4.17902	-4.17984	-5.63725	-6.15466	-4.1518	-3.62505	-1.75601	-5.07672	-2.85568	-3.80569	-4.32634	-1.53132	-4.6362	-0.989681	-5.21655	-3.77262	-4.13797	-2.84856	-3.19249	-6.00621	-4.87668	-4.01232	-5.2536	-3.74775	-1.37202	-1.17733	-1.51963	-2.16632	-1.03972	-2.77797	-1.71625	-2.02495	-1.26052	-1.67026	-1.02011	-1.63731	-3.77647	0.562138	1.5031	0.0113841	linear_increasing	9.34969e-05	0.000360122
DCTN6	-	-2.85775	-2.60853	-5.03155	-2.20804	-3.07626	-6.02	-4.83857	-4.39749	-3.12032	-4.62372	-5.63094	-3.70308	-4.88079	-6.25176	-5.23317	-3.02737	-4.70792	-3.76261	-5.01676	-2.92676	-3.45714	-3.94166	-3.9421	-2.26582	-5.32102	-3.41585	-5.54649	-4.88052	-4.82822	-2.27916	-2.66511	-2.6124	-2.23997	-2.30352	-3.96455	-5.39729	-4.18733	-1.54709	-2.68215	-2.2997	-2.98991	-4.12671	1.16015	1.17452	0.131689	other_trend	0.0114271	0.0211888
COPG2	-	-2.90292	-4.31048	-4.14235	-3.0905	-3.16154	-3.29685	-4.59032	-3.07723	-3.19067	-4.89269	-3.80396	-4.51342	-5.31953	-5.23183	-3.2271	-5.2821	-5.18287	-6.37748	-3.26871	-3.27815	-3.48527	-4.02952	-2.80828	-5.62488	-3.11528	-3.20468	-4.36193	-4.87263	-6.9691	-2.79317	-2.71193	-2.19975	-2.65703	-2.61837	-3.63756	-3.41716	-5.014	-2.80985	-3.55314	-2.74007	-3.13588	-4.11351	0.806114	1.12074	0.403051	other_trend	0.015355	0.0270507
CSPG4	-	-3.5479	-4.86376	-3.87247	-4.60302	-2.5875	-2.69183	-7.47578	-2.76326	-4.25461	-2.39856	-3.24876	-4.5404	-5.22817	-5.80523	-5.31649	-4.09939	-2.59237	-2.06602	-4.04946	-5.38097	-3.96579	-2.56332	-5.69632	-3.4603	-2.87008	-3.84313	-4.08364	-2.68749	-3.0557	-4.08514	-2.55116	-2.59157	-2.10908	-1.39005	-1.82175	-2.22169	-3.41987	-1.75254	-1.89434	-2.07314	-2.18252	-3.92323	0.565612	1.2493	0.0025158	linear_increasing	0.000139612	0.00050629
CAPRIN1	-	-2.42767	-2.59687	-3.91912	-4.1321	-2.63383	-4.829	-4.24597	-5.84366	-3.99548	-2.59728	-4.76979	-1.66028	-5.20272	-4.19949	-5.62561	-5.14159	-5.03573	-2.45299	-1.29926	-4.92094	-5.75778	-4.28346	-7.32735	-4.89296	-2.39658	-6.28114	-5.77793	-6.0668	-2.50121	-3.57693	-1.79101	-2.22409	-1.33868	-1.95346	-2.15271	-2.3624	-4.61591	-1.93791	-2.28773	-1.84599	-2.25099	-4.21305	0.882637	1.51842	0.11858	other_trend	0.000434639	0.00135393
IST1	-	-2.26487	-5.20209	-5.66032	-2.49929	-2.36312	-5.04537	-3.63614	-4.22144	-4.97619	-5.0659	-3.06962	-4.84656	-3.44842	-3.68137	-2.66779	-4.89309	-1.9432	-4.92257	-1.86658	-3.12427	-3.16588	-3.32049	-4.6682	-4.46529	-4.38824	-2.18657	-3.66879	-4.1215	-5.14121	-1.98557	-2.12027	-2.1057	-2.01378	-1.9353	-2.07283	-1.98181	-6.67942	-2.0689	-2.26584	-2.03372	-2.52776	-3.75033	1.4615	1.16474	0.020381	linear_increasing	0.0103738	0.0195667
MGAT1	-	-2.36694	-2.14227	-4.96622	-3.12446	-2.26717	-5.96835	-3.66555	-7.27929	-4.60327	-4.98488	-5.43123	-2.62312	-4.38023	-3.73555	-6.24533	-4.52189	-6.31149	-2.03215	-4.05182	-4.95379	-4.3512	-4.70608	-5.85082	-2.81642	-3.52735	-2.10798	-5.66063	-3.72432	-6.63786	-2.35233	-2.13894	-1.90108	-1.40243	-2.56955	-1.5652	-1.49234	-2.32355	-2.43563	-1.57512	-1.48682	-1.88907	-4.24633	0.443797	1.51354	0.0125391	linear_increasing	2.33596e-05	0.000109773
SRP68	-	-2.14236	-4.93713	-2.57523	-7.02157	-2.67881	-5.56308	-6.12305	-5.07422	-3.80643	-4.47608	-2.96076	-4.40291	-5.56116	-3.68479	-5.37667	-5.69861	-4.94931	-4.24984	-2.01919	-6.01411	-2.57722	-3.13741	-3.99575	-4.78149	-6.01513	-3.91227	-5.19162	-5.10707	-5.41955	-2.33005	-2.16434	-3.40287	-2.39917	-2.11324	-2.54983	-1.95074	-5.99131	-2.18317	-2.04316	-2.1139	-2.69117	-4.39276	1.2326	1.35666	0.0456694	linear_increasing	0.00117749	0.00314763
ASL	-	-3.18095	-3.35139	-2.93115	-5.51007	-2.63022	-3.5567	-6.0903	-3.62812	-4.88729	-5.65184	-4.80491	-4.45944	-5.83052	-4.18615	-2.56747	-2.12964	-6.46431	-3.41593	-3.72698	-3.17094	-4.27254	-4.7843	-4.2844	-4.40999	-2.73281	-2.94515	-5.50186	-4.24758	-5.05398	-5.78167	-2.7483	-0.383527	-1.69308	-2.00906	-3.15751	-3.89291	-3.4757	-1.96931	-2.67743	-5.37633	-2.73832	-4.20629	1.36529	1.18269	0.0624788	other_trend	0.00227259	0.00547357
AKR1C2	-	-4.15003	-0.877202	-0.983917	-1.41702	-1.40426	-2.39335	-4.61184	-4.77831	-0.278735	-5.36882	-4.9038	-1.98635	-6.13898	-5.08117	-5.10754	-4.06521	-4.18599	0.0276668	-6.37887	-3.41793	-4.94928	-2.67178	-6.51626	-4.77031	-4.68635	-5.37254	-2.58771	-4.13897	-4.53582	-3.9685	-3.78682	-1.31658	-0.747209	-3.70164	-0.646296	-1.34409	-1.25006	-1.6919	-0.890677	-1.14807	-1.65234	-3.72331	1.14468	1.83468	0.537386	other_trend	0.00187397	0.00465345
ACSL4	-	-2.97913	-4.404	-3.36891	-3.97455	-1.88891	-5.42841	-5.30879	-5.87467	-1.88328	-5.77134	-3.91406	-1.86204	-6.38653	-3.69161	-4.53066	-5.82428	-6.16037	-2.45211	-5.88912	-1.94433	-1.2601	-4.7867	-4.74554	-5.04074	-5.4261	-4.27216	-6.02541	-2.35385	-4.09913	-1.82768	-1.97455	-2.53143	-1.50141	-1.98917	-1.9991	-1.92541	-1.66717	-1.51846	-1.53077	-1.84115	-1.84786	-4.11248	0.315161	1.58459	0.00705499	linear_increasing	7.20885e-05	0.000289131
H1-3	-	1.07479	0.667279	-0.938217	-0.578955	-0.274149	-0.78622	-5.93665	-5.03007	-3.30922	-3.52845	-4.97875	-3.20658	-4.00768	-4.31707	-5.4396	-3.90986	-4.7503	-3.72885	-4.87923	-3.11187	-4.91485	-1.38008	-5.38252	-6.94008	-5.36656	-5.75074	-4.38147	-5.48882	-2.81654	-4.77046	0.200428	-0.125916	-0.0293772	0.0188182	-0.917155	0.00640152	-1.20305	0.0972095	-5.13061	0.298316	-0.678493	-3.60539	1.63856	2.09414	0.669914	other_trend	0.000268862	0.000901839
SNRPD3	-	-0.574055	-0.818238	-1.60132	-3.39849	-0.483569	-0.908806	-6.82524	-2.71564	-5.22171	-6.00142	-3.97676	-4.16069	-4.70263	-4.43277	-1.54243	-4.91814	-0.557223	-4.83392	-4.29195	-0.578297	-5.77308	-3.7798	-3.19091	-4.29466	-5.83042	-3.88678	-4.97221	-4.06024	-4.57871	-0.470766	-0.526763	-0.619295	-2.67334	-0.619903	-0.588201	-4.83303	0.305808	-4.28645	-0.472338	-0.376911	-1.46904	-3.44603	1.79962	1.93683	0.329341	other_trend	0.00717607	0.0143223
GALE	-	-4.06396	-4.89054	-2.40816	-4.10079	-1.85687	-5.66427	-3.83842	-3.87743	-5.33914	-5.1795	-2.79239	-2.1278	-5.03405	-5.09065	-3.77061	-3.72702	-4.63563	-1.84367	-2.57122	-3.96139	-3.67513	-4.7252	-4.53895	-5.22335	-2.90574	-2.03231	-3.75437	-6.43572	-3.29585	-4.50495	-2.0048	-1.53563	-1.83611	-2.32406	-1.9028	-1.457	-2.74689	-4.81463	-1.86728	-2.7254	-2.32146	-3.92884	0.979925	1.20995	0.0178856	linear_increasing	0.000514492	0.00155725
CTBP1	-	-2.34711	-2.46895	-5.41825	-4.0249	-6.35718	-4.41237	-3.13735	-4.95287	-2.26444	-5.32791	-6.41208	-3.91127	-6.34902	-3.92856	-4.06415	-4.24561	-2.45494	-2.00953	-2.50169	-2.32039	-2.34911	-4.40854	-5.31532	-6.17908	-4.67679	-4.14813	-4.05757	-2.86796	-7.00783	-2.91741	-2.07773	-2.51432	-2.6245	-2.52036	-2.62098	-1.92579	-2.58107	-2.57515	-2.6092	-2.3843	-2.44334	-4.09454	0.245904	1.47575	0.0300581	linear_increasing	0.00123056	0.00325775
ATP6V1E1	-	-2.40998	-1.64392	-4.27979	-4.40016	-6.44869	-5.09409	-5.64372	-1.05553	-2.95229	-4.88993	-4.94243	-6.00209	-6.01646	-4.85087	-3.19889	-4.86799	-5.15737	-5.73869	-0.443403	-1.44344	-1.45023	-5.26054	-3.96372	-1.94103	-0.175361	-5.08007	-4.84922	-4.851	-6.42424	-5.16837	-1.40576	-0.281832	-1.03797	-1.24823	-1.72011	-1.27372	-0.474609	-1.19268	-0.847371	-1.40331	-1.08856	-4.02145	0.44192	1.85882	0.00735493	linear_increasing	1.79388e-05	8.66293e-05
CAMK2G	-	-4.57224	-3.20017	-2.33185	-4.44246	-5.50485	-2.82372	-2.60433	-4.02223	-4.00731	-2.11914	-2.68983	-4.78026	-4.18495	-3.25372	-4.03446	-5.46794	-2.45693	-5.11046	-4.16297	-3.34278	-4.49475	-3.09419	-4.97359	-5.6963	-4.74984	-5.01425	-2.92013	-2.85952	-5.69809	-1.31897	-1.89457	-2.0964	-5.99144	-2.30409	-0.450032	-1.24737	-1.29029	-1.51805	-3.48876	-1.75175	-2.20328	-3.86441	1.5497	1.18458	0.060362	other_trend	0.00103772	0.00282908
UBE2D2	-	0.226863	-0.81353	-5.32838	-6.23576	-6.28127	-0.607597	-4.3889	-4.60862	-1.34112	-4.83451	-4.86364	-0.908818	-6.81727	-5.30627	-4.66285	-5.26983	-6.62421	-3.93636	-4.7966	-4.02618	-1.42639	-5.58452	-5.55619	-3.48831	-5.65747	-0.776673	-5.59381	-4.51625	-3.98324	-1.37882	0.307721	-0.156146	0.124135	-0.0368175	-0.329251	-0.24927	-1.21963	-0.371355	-0.0382438	0.00550645	-0.196335	-3.97955	0.414703	2.0672	0.00585153	linear_increasing	1.46061e-06	1.0062e-05
DCXR	-	-2.80536	-4.90964	-7.1353	-4.68466	-5.7143	-5.395	-2.14787	-2.24698	-3.00415	-2.62921	-4.8395	-6.05405	-5.38345	-3.48266	-3.66641	-5.07746	-2.72037	-2.89627	-2.80391	-4.36816	-2.46294	-5.36011	-4.74205	-5.28351	-5.06802	-5.78553	-4.32954	-3.48812	-2.91683	-2.21973	-0.606722	-0.493477	-0.5111	-1.31392	-1.66008	-1.29839	-1.57001	-1.40279	-0.679568	-1.16599	-1.07021	-4.1207	0.452357	1.37248	1.46304e-05	linear_increasing	3.88908e-08	4.15268e-07
ATP6V0D1	-	-1.84588	-5.04156	-3.09432	-2.29237	-5.41603	-3.41344	-4.83791	-4.67495	-4.61725	-2.12357	-4.76395	-1.27717	-4.08112	-3.04607	-2.1251	-5.5793	-4.19394	-7.01889	-1.597	-2.09274	-4.55425	-5.57273	-3.71176	-3.0428	-6.18367	-4.83921	-2.69841	-4.12401	-5.83816	-1.18819	-0.777557	0.00701487	-1.11112	-1.22699	-1.85739	-1.9487	-1.63491	-1.30378	-1.41574	-1.5133	-1.27825	-3.82953	0.569609	1.57275	0.00601213	linear_increasing	1.39168e-05	7.00211e-05
AP1M1	-	-1.57994	-5.11752	-3.08748	-4.52554	-5.04633	-4.77259	-3.96191	-3.90382	-5.55823	-1.92389	-2.27739	-1.57642	-4.79565	-3.5603	-3.26403	-3.89827	-1.90881	-1.19031	-1.68788	-3.8806	-1.60996	-3.43199	-6.43484	-4.83674	-5.04834	-2.2221	-5.70948	-4.25579	-5.22718	-1.24152	-1.16207	-0.891893	-1.44484	-1.32047	-1.67989	-1.49076	-1.5539	-1.42053	-1.32585	-1.16249	-1.34527	-3.58449	0.227487	1.53521	0.00463825	linear_increasing	5.24172e-05	0.00021949
FKBP3	-	-1.73381	-4.05239	-0.969442	-5.05454	-5.04028	-1.9812	-4.88056	-6.95496	-4.93154	-0.500813	-3.72594	-2.22091	-3.66338	-4.5336	-4.92851	-5.99585	-0.555641	-4.44968	0.227966	-5.04066	-3.35051	-4.28227	-2.33361	-5.06649	-1.83668	-1.17618	-4.7437	-6.62327	-6.10817	-1.30724	-1.68025	-1.45351	-1.13414	-1.33326	-1.47977	-4.29607	-2.05734	-1.01466	-1.44469	-1.58558	-1.74793	-3.59379	0.940248	1.98242	0.10966	other_trend	0.00754835	0.0149258
ALDOC	-	-1.56505	-4.68921	-1.54167	-5.70886	-5.10394	-4.82852	-1.13727	-1.16971	-1.93687	-1.44754	-5.82804	-4.58536	-2.08904	-7.42013	-3.21315	-5.86868	-0.78468	-4.88622	-1.93091	-6.11515	-4.619	-4.66143	-6.5937	-1.12856	-5.54485	-5.01911	-3.86066	-5.25486	-2.29005	-1.60168	-1.07932	-0.992169	-1.34581	-1.0551	-0.94625	-1.45129	-2.98328	-0.891637	-0.398265	-0.940389	-1.20835	-3.74746	0.684123	1.99005	0.04294	linear_increasing	0.000348976	0.00111789
RPS28	-	-4.10164	-1.07321	-5.73274	-4.35599	-4.92587	-1.32606	-2.77751	-1.33226	-1.00446	-2.92217	-7.12243	-0.887391	-4.52011	-4.97935	-6.38676	-4.52197	-4.22738	-1.18513	-0.073947	-1.21376	-5.4144	-3.78806	-4.6299	-4.31134	-4.5372	-2.85997	-5.11101	-4.86988	-4.39525	-3.7974	-3.60703	-0.434752	-1.12963	-0.373603	-4.3444	-0.946743	-0.811783	-1.4441	-1.05092	-3.13537	-1.72783	-3.61282	1.42247	1.83891	0.154915	other_trend	0.00539934	0.011354
RDH11	-	-2.88762	-2.98255	-4.54864	-5.31196	-4.81579	-6.80771	-4.18548	-3.51256	-2.17128	-4.42589	-4.48712	-1.79593	-4.78143	-3.55983	-4.65606	-5.33986	-2.22443	-4.48983	-2.38237	-2.30053	-3.91665	-2.69282	-3.09706	-5.27309	-0.861683	-2.86378	-5.60849	-2.52776	-4.83992	-5.62956	-1.92282	-2.37808	-2.65948	-4.78775	-2.54231	-2.27198	-3.9334	-2.08122	-1.66994	-2.45621	-2.67032	-3.83259	0.959852	1.39247	0.0637151	other_trend	0.019337	0.0326016
ALOX5AP	-	-4.91578	-4.97098	-5.08048	-2.9188	-4.18983	-4.79863	-2.58129	-4.51416	-3.6589	-4.16736	0.15044	-4.1672	-3.54312	-4.55485	-4.17662	-5.51412	0.395766	-0.453461	0.756398	-3.81173	-4.45845	-4.0308	-5.06785	-3.52105	-0.649499	0.378035	-4.89968	0.278817	-4.32411	1.27569	0.0668728	1.3014	-0.663927	-0.207312	-0.0548949	-0.498441	-0.0227343	-0.229883	-0.979793	-0.833843	-0.212256	-3.05779	0.64044	2.15169	5.2044e-06	linear_increasing	0.000216051	0.000748197
ESYT2	-	-2.21931	-3.73796	-2.289	-6.80353	-4.14773	-4.20636	-5.64832	-4.64701	-2.94295	-5.57773	-4.56619	-2.55995	-3.167	-5.29605	-6.39503	-4.77378	-1.86786	-2.41552	-2.16656	-4.53169	-2.94377	-4.1226	-3.53016	-6.63122	-3.31694	-5.31193	-2.667	-6.72007	-2.70683	-2.37618	-1.66835	-1.75168	-2.20731	-2.08875	-0.656261	-1.76048	-5.95331	-1.54974	-2.095	-2.10134	-2.18322	-4.00954	1.39843	1.51523	0.0235071	linear_increasing	0.00178308	0.00446817
PDS5B	-	-2.66893	-5.56431	-3.37101	-3.47387	-4.1371	-4.17116	-5.7319	-5.39672	-2.50281	-4.43656	-4.88136	-3.12837	-4.56913	-4.31126	-3.89752	-4.87613	-6.36169	-2.85987	-3.53508	-3.4534	-5.69137	-5.65853	-4.31945	-4.46593	-3.47347	-3.57168	-4.5256	-2.98197	-3.59698	-3.34126	-1.9742	-2.806	-4.72111	-2.3011	-3.14736	-2.67469	-3.45945	-3.04036	-2.71508	-3.01967	-2.9859	-4.16515	0.7424	1.01594	0.0129494	linear_increasing	0.00173474	0.0043654
TMX4	-	-4.11926	-2.20363	-4.07817	-5.58546	-3.95752	-3.30565	-6.31485	-2.15981	-1.81097	-3.55898	-2.44649	-4.36555	-7.43481	-6.57935	-4.63928	-4.59836	-5.47479	-5.61242	-1.99655	-5.41465	-2.50377	-5.31387	-4.05809	-1.75612	-5.02187	-4.31896	-2.32888	-3.58366	-4.90442	-1.82454	-4.85047	-1.28663	-3.87056	-1.65218	-1.03986	-1.83705	-2.23742	-1.50705	-3.12107	-1.33957	-2.27419	-4.04236	1.2668	1.56627	0.0429741	linear_increasing	0.00257924	0.00608257
SLPI	-	-2.05384	-2.61119	-1.2616	-3.05273	-2.69448	-5.27143	-6.99497	-4.96434	-2.68574	-5.94363	-6.73998	-1.55752	-4.33337	-7.26452	-4.53244	-5.69123	-0.095649	-0.632945	-5.41678	-6.1097	-7.07703	-5.62241	-5.90776	-6.49765	-2.0632	-4.84835	-5.93807	-5.55374	-6.20201	-4.40045	3.57222	2.39956	4.69418	3.00716	4.38424	3.23036	2.74801	1.83411	3.91666	2.70646	3.24929	-4.46729	0.897849	2.07065	0.000437617	linear_increasing	8.87934e-14	6.82644e-12
ACSF2	-	-2.49961	-4.74725	-4.07739	-4.26335	-3.59676	-3.26152	-5.11538	-4.93454	-2.18341	-2.52667	-5.66643	-2.68828	-4.74669	-6.18066	-5.22361	-4.00917	-3.50401	-2.46161	-2.24443	-4.51653	-6.66104	-5.55876	-4.10253	-7.00216	-5.43097	-2.17215	-2.75249	-4.49199	-5.48182	-5.19381	-2.08122	-1.60544	-1.58694	-1.85318	-2.32603	-2.46171	-5.5689	-1.97244	-2.4205	-1.74822	-2.36246	-4.24317	1.17086	1.38985	0.111863	other_trend	0.000452315	0.00140233
CAMP	-	-5.56428	-1.90287	-2.02399	-2.15483	-2.49445	-2.64494	-3.36651	-1.95305	-6.49255	-4.01381	-2.9759	-3.07431	-4.64127	-4.81327	-5.50224	-4.40841	-4.77447	-5.20382	-2.25398	-5.73404	-2.24747	-4.3718	-3.98279	-5.13873	-3.7222	-3.24528	-3.47036	-5.76128	-4.69913	-0.880917	-0.896089	-2.27075	-5.89591	-0.899174	-1.57636	-5.86432	-1.64926	-1.71901	-3.10817	-0.748664	-2.46277	-3.78377	1.93358	1.43741	0.389607	other_trend	0.0266922	0.0428591
MMS19	-	-3.27237	-5.41781	-4.35353	-4.15615	-3.14109	-4.90657	-4.60869	-4.75832	-6.64624	-4.77634	-5.6319	-3.77707	-3.74057	-4.04439	-5.3627	-4.85361	-3.4612	-3.65473	-3.64621	-3.8208	-3.45206	-5.2981	-2.3971	-2.41869	-3.2938	-3.54776	-1.07836	-4.81756	-4.43134	-3.40714	-2.70834	-2.42099	-2.63089	-3.37118	-3.72299	-4.00505	-2.98096	-3.22145	-3.98066	-2.61626	-3.16588	-4.07241	0.587876	1.11536	0.00137875	linear_increasing	0.0192444	0.032531
YARS1	-	-0.282242	-0.392565	-6.17396	-0.785289	-0.573751	-4.77768	-6.46567	-5.52274	-1.62961	-1.34756	-3.4167	-3.62466	-6.11397	-3.94171	-5.62224	-3.92517	-4.62514	-0.803771	-1.14424	-3.95056	-5.82172	-3.64155	-7.46169	-3.98309	-3.58443	-3.68838	-3.09473	-6.75477	-2.27616	-4.32273	-1.16908	-0.572974	-0.43097	-1.55374	-1.35446	-1.47286	-0.971295	-1.01622	-1.18408	-0.777872	-1.05036	-3.65828	0.372613	2.07887	0.179009	other_trend	0.000364959	0.00115751
TOMM70	-	-0.993096	-3.96198	-3.47099	-4.94956	-0.823899	-2.02278	-4.07702	-6.09154	-3.79404	-4.58611	-4.67444	-5.56959	-5.77277	-5.77692	-3.36706	-6.78892	-1.64539	-1.3176	-1.80078	-3.67182	-6.73565	-2.13409	-2.83427	-4.83578	-6.64336	-0.999879	-6.16368	-4.51124	-5.04206	-1.04213	-0.912322	-1.38353	-1.17586	-1.19283	-1.15616	-1.49831	-1.32059	-1.10602	-1.11465	-1.47607	-1.23363	-3.86995	0.18365	1.92399	0.0212016	linear_increasing	0.000118546	0.000439855
RPS25	-	1.17114	-2.71151	0.979297	-4.26218	1.07556	-3.52276	-2.45561	-6.49331	-4.68271	-6.07181	-7.05133	-4.24566	-5.05906	-4.33148	-5.15863	-3.14309	0.280654	0.77511	0.518193	-5.91384	-5.84566	-0.848261	-6.29204	-5.03859	-5.55276	-4.05393	-2.96441	-4.91699	-4.39274	0.0698066	0.230211	0.118226	-0.0353369	0.135999	0.970445	0.448946	0.969826	0.163295	0.0487917	-0.0485968	0.300181	-3.33795	0.380193	2.61337	0.0472767	linear_increasing	9.86968e-05	0.000377128
ISOC2	-	-0.673196	-2.44386	-1.35033	-5.8548	-0.635033	-4.93383	-3.78445	-2.42394	-1.94355	-5.03485	-3.23257	-1.6611	-3.96493	-3.55678	-4.24261	-5.10222	-0.979306	-4.67214	-3.32981	-5.42961	-4.69907	-2.24221	-4.49409	-7.21907	-4.41197	-4.04688	-7.07901	-3.6315	-4.94093	-3.11526	-2.01647	-1.42511	-1.27165	-1.92619	-1.93359	-1.67602	-1.7964	-1.73103	-1.21215	-1.22686	-1.62155	-3.7043	0.311995	1.728	0.506071	other_trend	0.000572358	0.00170554
H6PD	-	-1.79286	-3.84767	-4.90824	-4.3969	-6.86921	-5.28453	-3.16066	-1.74265	-1.01775	-1.4022	-1.15466	-1.15841	-5.01133	-3.80424	-1.66109	-4.66585	-1.17004	-3.1108	-3.16264	-4.78671	-3.94673	-5.10433	-6.6656	-5.43387	-3.52154	-1.67701	-6.80401	-6.33433	-4.72964	-1.92952	-0.307179	-1.31753	-1.10275	-0.930985	-1.16576	-1.13584	-2.13074	-1.61288	-1.37575	-3.38327	-1.44627	-3.67517	0.825017	1.87029	0.074362	other_trend	0.000836662	0.00234412
CA4	-	-4.24108	-4.23777	-3.94355	-4.77204	-6.49042	-5.55978	-3.01262	-3.53158	-2.69685	-5.57515	-3.94084	-4.61701	-4.562	-3.56593	-5.0354	-2.15377	-0.411041	-3.37708	-0.629869	-5.17276	-6.7505	-2.31872	-4.23124	-2.395	-1.48142	-5.66781	-3.96002	-1.95029	-2.88076	-5.40869	2.23949	3.07233	-0.0743254	2.7811	2.27056	3.11245	1.39878	2.74058	1.7626	3.25486	2.25584	-3.81903	1.01748	1.60492	3.58768e-07	linear_increasing	1.37501e-13	1.01645e-11
H2BC21	-	-3.6561	-3.73561	1.50237	-5.49727	-6.20034	-6.43821	-5.45875	-2.71849	1.22535	1.85615	-4.49721	1.45661	-5.37044	-6.51443	-1.34417	-2.2443	1.44667	1.78846	2.90865	-3.82972	-3.17043	-3.58617	-4.52809	1.55306	-4.17688	-2.93307	-5.44886	-4.62542	-4.20298	1.86721	2.55053	2.37867	3.2707	2.69861	-7.04587	1.70976	-2.70152	2.11056	2.50715	2.2213	0.969987	-2.48575	3.27066	3.04824	0.0146778	linear_increasing	0.00414987	0.00910847
SRSF10	-	-4.78047	-1.10471	-0.534067	-4.87473	-5.06476	-3.11696	-3.22187	-5.77475	-1.56661	-3.96007	-1.47688	-1.06821	-5.5248	-6.32229	-4.86826	-3.78747	-1.1822	-3.23315	-0.361033	-4.51786	-5.54307	-4.96234	-5.08051	-1.25966	-3.92979	-4.07592	-4.25504	-2.7425	-4.83737	-1.10156	-0.911323	-0.830564	-0.960663	-0.94444	-0.853704	-1.09586	-1.46063	-0.8291	-1.10003	-0.824469	-0.981079	-3.47096	0.197322	1.79295	0.0137103	linear_increasing	0.000100084	0.00038167
ANO6	-	-4.66207	-6.40272	-3.36493	-2.18316	-4.46335	-3.5347	-3.55942	-2.7426	-2.63189	-2.54816	-4.34729	-4.79569	-3.13839	-4.24576	-2.57375	-5.92171	-2.80698	-5.21992	-2.64252	-2.53695	-6.43371	-4.45424	-2.89885	-3.30867	-2.09272	-2.51698	-3.73833	-5.84187	-4.85678	-4.58417	-2.11538	-2.60926	-1.2191	-1.85158	-2.00696	-1.29398	-2.65191	-1.82784	-1.2877	-1.61389	-1.84776	-3.83494	0.515769	1.28191	0.00859499	linear_increasing	2.96256e-05	0.000133038
GCA	-	-4.59428	-1.66529	-0.728936	-5.31362	-2.97689	-2.11859	-3.25835	-5.30673	-7.06405	-4.56535	-0.780696	-1.19227	-4.33747	-1.96427	-3.82065	-4.08095	-4.71228	-4.07747	-0.706825	-4.29996	-0.495946	-5.08093	-3.79034	-3.61707	-1.04694	-5.4293	-4.42719	-6.09694	-7.54666	0.290949	0.926465	0.335452	-1.07252	0.257792	-0.57201	-6.00427	-0.619372	0.563016	-1.89494	-0.498618	-0.8579	-3.49351	1.99294	2.04307	0.0480109	linear_increasing	0.00103577	0.00282908
CXCL17	-	-5.06224	-1.09009	-0.487609	-3.56737	-2.02302	-5.28324	-4.95732	-0.904837	-0.656833	-4.4462	-5.2118	-0.834658	-4.36139	-3.3294	-5.46068	-4.39454	-0.623651	-0.394174	-2.85464	-4.46815	-4.99903	-5.68508	-2.27836	-1.94116	-3.94087	-1.81883	-3.24879	-4.77775	-6.46316	-5.40179	0.438696	-0.00765358	0.422076	-0.0306718	0.956279	-0.0202757	0.642781	-0.455361	-0.289822	-0.0853389	0.157071	-3.36556	0.441156	1.88245	0.0221372	linear_increasing	1.01497e-06	7.44571e-06
CHST14	-	-5.44303	-3.62159	-2.85433	-2.26955	-2.78075	-7.59744	-3.61347	-2.99847	-4.78034	-4.96592	-6.60816	-3.25826	-4.68326	-6.53319	-5.8564	-3.8966	-2.00934	-1.24813	-2.76104	-6.03809	-4.48099	-4.51147	-3.09005	-5.88824	-4.69156	-3.26484	-3.99776	-4.78569	-2.49188	-3.52961	-1.27576	-3.74243	1.35304	-0.980116	-0.0551612	-0.508416	-1.15689	-1.35532	0.245879	-1.12736	-0.860254	-4.15165	1.32466	1.51886	0.000413021	linear_increasing	4.01764e-07	3.39943e-06
TMX1	-	-6.37252	-1.70877	-1.85681	-3.0006	-2.67653	-3.40982	-3.52197	-3.96977	-1.9326	-2.32933	-5.52064	-1.98965	-6.04568	-5.19316	-2.3694	-4.18361	-1.96794	-4.17105	-1.60123	-5.04279	-2.63148	-3.16113	-4.54888	-2.36538	-5.1295	-3.11469	-7.58259	-5.20042	-3.8252	-1.8153	-1.2881	-1.50646	-1.70549	-1.97468	-1.64533	-1.79861	-1.59136	-1.84003	-1.77932	-1.79095	-1.69203	-3.60795	0.19455	1.59307	0.0606075	other_trend	0.000569016	0.00169821
U2AF1L5	-	-2.04839	-4.10151	-0.30844	-6.53051	-2.20632	-4.8956	-2.75196	-5.30261	-3.34896	-1.52576	-4.50033	-5.07398	-1.55081	-5.0651	-4.28163	-4.98194	-0.0261765	-0.823829	-0.193254	-6.49048	-4.42232	-4.54429	-3.59512	-4.45237	-4.4995	-2.16672	-2.15863	-2.27726	-3.42962	-5.30576	-0.610231	-0.144849	-0.116501	-0.570477	-0.612197	-0.666581	-1.93631	-0.6977	-4.04328	-0.70931	-1.01074	-3.42864	1.17487	1.82768	0.0187372	linear_increasing	0.00037454	0.00118399
MFAP5	-	-0.883162	-1.17566	-0.797282	-4.99157	-0.972716	-1.82268	-4.16243	-2.87637	-1.23708	-4.59979	-4.83926	-0.528158	-2.73891	-4.47312	-3.73723	-0.480807	-0.225445	-0.958822	-5.79574	-4.11046	-5.46995	-5.72195	-4.22954	-5.81155	-6.20718	-5.37959	-6.38407	-5.25026	-2.94172	-5.45562	0.282522	-0.304293	0.593621	-0.114437	2.38454	0.550667	1.32548	-0.445557	0.00428375	-0.287256	0.398957	-3.47527	0.880244	2.0623	0.152512	other_trend	1.33816e-06	9.285e-06
TRIP6	-	-4.64061	-3.44874	-5.49406	-4.91911	-1.58228	-3.38474	-5.73943	-5.12533	-1.79594	-1.90012	-2.60301	-1.71752	-3.726	-3.87796	-5.33815	-4.5878	-1.42262	-1.78808	-1.94833	-3.72786	-3.37773	-0.759052	-3.22061	-5.47039	-3.75192	-1.16157	-5.30397	-4.00003	-5.51263	-4.90664	-1.28882	-1.35974	-0.676747	-1.18339	0.00214692	-0.717496	-1.01214	-0.917162	-0.260636	-0.936711	-0.83507	-3.54107	0.437254	1.54308	0.00271258	linear_increasing	3.44007e-06	2.10567e-05
HMGCL	-	-1.70276	-2.07619	-5.26764	-4.2247	-1.92711	-5.11285	-4.37307	-5.72412	-2.08304	-3.27283	-4.28984	-2.10873	-2.97312	-5.10359	-4.32204	-7.06999	-1.36293	-5.70193	-3.08531	-1.97496	-3.80789	-4.23303	-5.84093	-4.82237	-7.00976	-1.14969	-3.82906	-3.11173	-4.37854	-1.40971	-1.83669	-0.483267	-2.20357	-1.25939	-1.76635	-1.57505	-4.07524	-1.38496	-1.61159	-1.01017	-1.72063	-3.77831	0.95378	1.67407	0.036098	linear_increasing	0.000735801	0.00211708
RPL30	-	0.446694	-0.600111	-3.30814	-3.86127	-0.26727	-2.00102	-6.67531	-3.84927	-0.614241	-3.054	-3.51049	-0.928246	-4.54968	-6.40154	-4.31534	-4.80746	-0.228892	-4.87201	-0.451155	-4.28982	-3.83911	-5.5974	-3.9978	-2.99029	-5.45157	-5.12482	-4.37787	-4.11011	-2.21137	0.174003	1.55234	0.4969	0.258772	1.33823	-0.12403	0.396994	1.33802	0.319459	0.349752	1.28885	0.721529	-3.18883	0.59229	2.04653	0.0142532	linear_increasing	7.47983e-07	5.75049e-06
EIF3M	-	-1.42692	-6.42997	-2.40029	-2.05405	-1.95442	-4.06847	-2.46342	-6.42107	-4.64454	-3.11865	-3.81657	-2.15862	-4.53452	-4.80854	-2.02582	-4.67461	-1.50093	-2.25358	-4.4166	-6.55331	-3.81606	-5.06204	-3.92741	-3.42614	-4.54799	-2.25615	-4.46457	-6.56752	-4.45181	-1.976	-1.33315	-1.72917	-1.77531	-1.71945	-1.74512	-2.57856	-4.70602	-1.5207	-1.26969	-1.70194	-2.00791	-3.74069	1.01219	1.5659	0.130128	other_trend	0.00232901	0.00558149
VPS4B	-	-4.223	-0.509271	-0.807107	-0.81479	-0.893485	-4.44805	-4.73485	-4.31454	-4.48581	-2.21759	-4.4329	-0.916198	-4.98843	-5.74549	-3.77212	-5.38576	-0.565917	-1.314	-0.489412	-3.63915	-4.31953	-4.32726	-5.14456	-3.86215	-4.01649	-4.34629	-4.31963	-5.45966	-4.59186	-0.505865	-0.653105	-0.85332	-0.289348	-0.9938	-0.590805	-0.795504	-0.744223	-0.72038	-0.0111158	-0.115552	-0.576715	-3.31971	0.327995	1.82133	0.0604805	other_trend	3.39751e-05	0.000148747
OXSR1	-	-0.618214	-6.91065	-6.21301	-4.31274	-2.08037	-4.61693	-4.52385	-4.3134	-2.18064	-4.73736	-4.62667	-2.25918	-6.28091	-5.44598	-3.94012	-5.94602	-2.04744	-2.50413	-1.69884	-5.95042	-6.22335	-4.39123	-4.60295	-5.07564	-2.61915	-1.93582	-3.16047	-5.06701	-3.36833	-1.9123	-1.95976	-1.84441	-2.57661	-2.2168	-2.21175	-2.74955	-5.41639	-1.80783	-2.31845	-2.10361	-2.52052	-3.98544	1.06057	1.68391	0.0257772	linear_increasing	0.0140968	0.0251104
SEC24C	-	-2.36796	-3.45002	-2.65425	-4.76892	-2.0141	-4.71676	-4.4035	-4.85012	-2.70174	-3.01132	-3.52441	-2.73768	-4.94805	-4.21642	-5.04269	-5.47398	-2.51908	-5.66356	-2.01638	-4.19711	-4.97926	-2.98498	-7.24948	-3.60365	-4.94137	-4.45814	-5.00533	-3.81062	-2.43717	-2.29496	-1.4569	-1.60341	-1.47878	-2.10839	-2.00038	-2.04984	-2.70136	-2.00261	-2.1398	-1.75567	-1.92972	-3.90143	0.37415	1.28975	0.0205685	linear_increasing	3.06363e-05	0.000135675
ACTN1	-	-7.00927	-4.37813	-0.233232	-5.4567	-0.472106	-4.04537	-4.46419	-1.08723	-4.90041	-2.54036	-3.65918	-4.19845	-2.6346	-4.70031	-3.38549	-1.32495	-0.378206	-0.61125	-1.72239	-3.19008	-3.51728	-4.88112	-3.00435	-4.34617	-3.99769	-0.624485	-4.97487	-5.41922	-3.96373	-0.895285	-0.829669	-1.82802	-5.89576	-0.461722	1.27218	-0.174159	-0.341283	-0.665556	0.363787	-1.09664	-0.965685	-3.20054	1.92125	1.82919	0.0154621	linear_increasing	0.00207452	0.00507928
EMC1	-	-3.14977	-3.35285	-6.78849	-6.38703	-2.34739	-3.27243	-5.09315	-4.15103	-3.24886	-3.2902	-6.57187	-4.85182	-4.77957	-5.77607	-6.22716	-4.94694	-3.26343	-3.06771	-2.82358	-5.63927	-5.3298	-4.66539	-4.93113	-4.93173	-4.0588	-2.79805	-5.83643	-5.32543	-5.76533	-3.08106	-2.867	-2.64096	-2.4556	-3.2206	-3.43323	-3.12082	-3.33927	-3.22466	-2.58256	-3.20579	-3.00905	-4.52506	0.345654	1.29744	0.043233	linear_increasing	0.000848097	0.00236925
AP2S1	-	-4.70541	-1.4363	-3.75867	-4.84872	-7.39925	-5.41325	-4.32878	-6.08061	-4.8354	-1.01194	-3.93932	-0.911805	-1.44768	-3.11368	-4.97099	-1.05019	-3.3349	-5.47228	-1.15879	-4.63596	-1.71501	-5.75782	-3.88432	-0.904861	-1.05341	-4.88468	-4.56568	-5.72627	-4.58385	-1.05253	-0.564224	-0.752895	-4.73775	-0.910753	-0.70015	-1.09397	-1.30778	-0.468017	-0.673638	-1.87196	-1.30811	-3.59941	1.2747	1.92908	0.00354636	linear_increasing	0.00122466	0.00325111
GET3	-	-5.75276	-4.46509	-0.637071	-4.33846	-5.39371	-4.41423	-5.28169	-4.41324	-0.505957	-0.705962	-4.36848	-0.627546	-3.32035	-6.17907	-0.250531	-2.72895	-1.33313	-4.44321	-1.0105	-4.40665	0.0917115	-6.22557	-3.89402	0.101618	-5.53413	-3.37105	-3.57434	-3.49342	-4.90661	-0.945215	-1.21931	-0.460348	-0.981833	-1.01597	-1.01491	-0.777249	-0.908171	-0.532248	-4.21531	-0.128602	-1.12539	-3.21092	1.1332	2.06527	0.00966928	linear_increasing	0.00441399	0.00959693
LTBP4	-	-7.2466	-4.90253	-0.991677	-5.64673	-5.70827	-1.13423	-4.82414	-4.41181	-3.56088	-1.72421	-3.61561	-0.293895	-3.46179	-3.85663	-6.63894	-4.52483	-2.15796	-5.6975	-5.26177	-0.967767	-4.14529	-2.34515	-5.24328	-1.6405	-3.25035	-0.490636	-4.62892	-1.05654	-4.50466	-4.60486	-1.20414	-3.27989	-0.972834	-0.318585	2.19405	-1.68864	-3.79083	-1.29466	-0.334227	-3.27491	-1.39647	-3.61793	1.77335	1.92097	0.00454831	linear_increasing	0.0025981	0.00611206
CDIPT	-	-2.3987	-2.31635	-2.78211	-5.53177	-5.33235	-5.97629	-5.03893	-4.36418	-4.34919	-3.89092	-2.21383	-4.34724	-5.48676	-2.00438	-2.36155	-5.05859	-2.40799	-5.20324	-3.69591	-2.08541	-5.60448	-2.11669	-3.85665	-2.93482	-3.44601	-6.90072	-4.59605	-3.62237	-2.52495	-6.25944	-2.20272	-1.95281	-2.11855	-2.9098	-1.45429	-3.09124	-2.44596	-1.7441	-1.80429	-1.81942	-2.15432	-3.95693	0.523966	1.45063	0.0343732	linear_increasing	0.000481228	0.0014658
ADD3	-	-0.678408	-0.615543	-3.94375	-0.914399	-5.00177	-4.90674	-2.34551	-5.82007	-3.91371	-4.18875	-0.896199	-0.575219	-4.90626	-1.05005	-4.8645	-5.3173	-0.375926	-0.254088	-1.2464	-5.45358	-4.75868	-5.25494	-4.9979	-3.06801	-1.29979	-2.78579	-6.48029	-3.47912	-4.12849	-4.1034	-0.264522	-0.569315	-0.290465	-0.108599	-0.465081	-0.817219	-0.70848	-0.157534	-0.564498	-0.758064	-0.470378	-3.25415	0.254281	1.97137	0.058111	other_trend	8.08506e-05	0.000318432
HTRA1	-	-5.44264	0.0896065	-0.708162	0.303385	-5.30394	-4.13838	-3.26455	-5.83497	0.0292617	-4.84744	-5.92899	0.251047	-4.71291	-5.08933	-5.22837	-5.96652	-0.340139	0.605215	-4.28855	-3.77313	-0.928773	-4.73357	0.811945	-6.35475	-3.54925	-0.32155	-5.58408	-3.70129	-4.4269	-3.88769	-0.23582	-4.49797	1.18131	0.269544	0.779024	-0.0358308	-0.276259	-1.16915	0.318666	-0.61226	-0.427876	-3.20885	1.57947	2.4266	0.0879776	other_trend	0.00169997	0.0043048
SNTB1	-	-4.10131	-3.29157	-2.00299	-1.37335	-4.37859	-3.64577	-3.98879	-2.0521	-1.64713	-1.72851	-4.85457	-1.60299	-3.59486	-4.26707	-4.65411	-4.89554	-1.35758	-4.95962	-4.59692	-3.46215	-1.48074	-4.92591	-3.64897	-6.08847	-1.39692	-5.73711	-4.15015	-5.27096	-4.00823	-1.45515	-0.528634	-0.253767	-0.0553226	-0.374147	-0.366772	-0.428971	-1.57239	-0.788081	-0.412624	-0.185765	-0.496647	-3.48727	0.426497	1.48972	0.0086288	linear_increasing	2.88947e-07	2.52434e-06
SEC61B	-	-6.4429	-5.79882	-1.42149	-6.10677	-5.15447	-4.52023	-3.28553	-2.91506	-3.74194	-6.87237	-1.65957	-3.8465	-6.39784	-5.47372	-1.60663	-6.1354	-1.69897	-1.42983	-1.86207	-5.42824	-5.85308	-2.12439	-3.34303	-6.13796	-1.98308	-1.4217	-5.7796	-5.41868	-5.43021	-1.88484	-2.69433	-1.90922	-2.59783	-1.65164	-3.97852	-2.17112	-3.83456	-2.35953	-1.79487	-1.87194	-2.48635	-4.03916	0.823329	1.93376	0.0219114	linear_increasing	0.0190329	0.0322585
ALYREF	-	-2.83218	-5.45253	-5.72824	-4.90592	-4.63728	-3.81455	-1.36679	-4.72601	-6.36072	-1.58439	-6.8299	-5.18116	-5.63538	-5.24959	-1.5723	-4.20882	-4.65004	-6.05804	-1.15121	-4.15846	-2.84382	-4.02072	-5.39693	-3.89887	-1.30514	-5.2865	-2.44761	-1.49972	-1.5229	-4.04601	-0.90844	-0.383456	-1.93783	-1.11535	-1.29989	-0.814201	-1.84271	-0.8589	-2.44082	-1.75412	-1.33557	-3.94572	0.637219	1.721	1.9404e-05	linear_increasing	3.85832e-05	0.000166271
CD163	-	-1.21575	-1.91158	-1.13338	-2.28732	-4.40179	-4.96478	-6.8659	-4.5353	-1.22702	-4.74474	-5.05993	-4.48034	-6.19249	-5.83785	-4.07636	-4.52705	-0.660956	-5.03937	0.523253	-0.754789	-4.95451	-2.23433	-4.26334	-6.90202	-4.05053	-4.64002	-4.37186	-6.8286	-6.47326	-1.12082	0.240886	3.83022	0.696126	1.48771	1.15285	2.94064	3.08314	1.14099	1.75235	0.953231	1.72781	-3.84109	1.17078	2.10798	0.00170879	linear_increasing	1.48825e-09	2.50914e-08
PODN	-	-1.5857	-2.2181	-2.15943	-3.99831	-3.31164	-3.91785	-5.12321	-2.10435	-1.07551	-3.96064	-4.94633	-4.14137	-1.81898	-4.05728	-5.12117	-5.15565	-1.35979	-4.19988	-3.47898	-5.01828	-2.44585	-3.90813	-1.64096	-5.65804	-5.51977	-2.29786	-5.29716	-6.4888	-5.04515	-2.43575	-1.56583	-3.35956	-1.76372	-1.6103	-1.12704	-1.64782	-3.61513	-1.47707	-1.77557	-3.54214	-2.14842	-3.64966	0.955749	1.51484	0.539166	other_trend	0.00569155	0.0118006
PRX	-	-7.10221	-6.49672	-3.53627	-4.44281	-2.24087	-3.90534	-5.39471	-4.54768	-5.8987	-5.8385	-4.95437	-3.77566	-3.68223	-2.92688	-4.08944	-0.793074	-0.444024	-5.31321	-5.75929	-1.26799	-1.50334	-0.0772277	-3.60883	-5.11997	-1.45108	-2.28956	-6.58411	-3.1974	-1.09574	-0.531491	1.23759	0.35659	-1.71096	1.9547	0.859675	0.799142	0.542631	2.00863	0.696613	0.371146	0.711576	-3.59562	1.03673	2.04577	1.81393e-08	linear_increasing	1.87479e-07	1.6838e-06
LAMTOR3	-	-1.74712	-1.35146	-1.35033	-4.68176	-1.70218	-4.78184	-4.18431	-2.98813	-3.61521	-3.14568	-5.39493	-1.69633	-3.83743	-1.88953	-2.42429	-4.46762	-1.29497	-3.48874	-1.66653	-2.18108	-3.41601	-4.8748	-4.9179	-2.45033	-3.91994	-2.90542	-4.29431	-4.62767	-5.8169	-1.40289	-1.13176	-0.0317846	-0.796867	-1.06788	-1.56906	-0.625499	-1.09043	-0.87132	-0.690006	-1.56786	-0.944245	-3.21719	0.456674	1.38797	0.0334223	linear_increasing	1.13702e-05	5.87604e-05
TAP2	-	-0.59108	-2.00847	-7.9735	-5.21785	-1.29073	-3.92231	-2.50447	-4.60858	-3.69481	-1.51573	-5.42398	-4.12006	-4.2448	-3.7501	-1.29514	-0.493789	-5.20264	-6.11201	-0.705582	-6.4948	-0.334938	-1.32416	-5.03561	-2.12318	-3.1227	-4.25049	-5.31221	-3.70717	-3.07859	-1.27934	-0.352415	-1.12896	-1.14787	-1.58559	-1.73448	-0.784258	-1.5872	-0.861699	-1.37207	-0.621087	-1.11756	-3.35796	0.458804	2.0133	0.0120015	linear_increasing	0.00134628	0.0035157
ETHE1	-	-3.65133	-3.75681	-5.20701	-6.15678	-1.48732	-5.156	-2.04838	-2.02496	-2.82416	-1.32432	-5.49188	-1.88004	-3.54328	-4.18807	-1.60716	-5.28784	-1.8354	-2.16052	-2.36398	-5.63816	-1.34878	-3.69994	-5.2309	-3.06704	-4.15289	-5.22152	-5.5716	-5.93242	-6.0082	-5.11534	-3.08724	0.431902	-0.319687	-0.95255	-2.06726	-0.482326	-1.11834	-0.604152	-1.3447	-0.8101	-1.03545	-3.76607	0.977073	1.64869	0.0445805	linear_increasing	1.6498e-05	8.03641e-05
FHL3	-	-3.20691	-3.55069	-3.0328	-2.96142	-2.45926	-4.11883	-2.81042	-3.18275	-2.85514	-3.17092	-5.11133	-2.81581	-5.43636	-5.68028	-2.56208	-3.86155	-2.59008	-3.20152	-2.94389	-4.9168	-3.12863	-4.09146	-4.61527	-4.17244	-5.4913	-5.50919	-4.61703	-7.11329	-3.42045	-3.65832	-2.32816	-2.83253	-2.68149	-2.70529	-1.74826	-2.50395	-2.37825	-2.40403	-1.51768	-5.06025	-2.61599	-3.87621	0.953918	1.16338	0.54474	other_trend	0.00374574	0.00839081
LGMN	-	-0.327239	-0.836801	-0.646023	-1.73581	-0.889346	-4.53783	-2.86964	-5.0043	-4.70523	-0.270887	-4.65445	-5.69631	-6.62429	-3.53259	-4.28699	-5.34337	0.3643	-3.52778	0.0987775	-4.15341	-1.21431	-4.38597	-4.14689	-4.75212	-5.91091	-4.23346	-5.09922	-4.79235	-1.8338	-1.07911	-1.01304	-0.680333	-1.48669	-1.30361	-1.11964	-1.27917	-0.494737	-1.2794	-1.24998	-1.71216	-1.16187	-3.22091	0.359726	2.06757	0.290002	other_trend	0.00356391	0.00800214
ARF6	-	-0.695037	-1.07996	-1.35833	-0.790402	-0.471281	-3.94546	-5.44805	-4.00208	-0.533369	-5.20304	-2.79031	-0.774148	-6.63284	-3.04142	-3.69928	-6.06102	-0.428848	-0.353101	-2.65708	-6.66565	-4.46525	-4.81799	-4.41067	-2.9951	-5.96942	-4.33404	-3.40497	-5.05802	-4.46788	-0.282207	-0.83408	-0.148423	-0.383915	-0.203229	-1.22326	-0.424361	-5.16177	-0.0648178	-0.381704	-0.36551	-0.919107	-3.22788	1.5298	2.09638	0.393776	other_trend	0.0027863	0.00645507
ARHGAP18	-	-3.145	-2.45527	-1.57671	-3.81142	-2.3059	-2.84703	-3.41922	-4.2478	-4.76691	-2.62401	-5.60815	-2.46691	-2.84177	-4.46499	-4.24909	-3.54277	-2.90581	-2.10354	-5.72658	-3.25057	-5.45886	-4.93103	-4.77823	-4.4373	-2.87035	-2.77384	-4.25602	-4.96458	-4.48229	-4.87843	-1.65203	-3.07151	-2.26266	-2.48532	-2.63266	-3.19387	-4.00049	-1.88661	-3.41452	-3.06757	-2.76672	-3.73968	0.720807	1.14086	0.894885	other_trend	0.0159845	0.0278533
ALDH4A1	-	-3.2895	-1.92166	-1.37731	-5.30043	-1.45501	-2.46846	-4.85975	-4.06934	-4.96357	-1.89724	-3.58863	-4.62991	-3.50732	-2.35935	-5.02555	-2.49734	-5.62424	-1.74059	-1.51388	-3.75889	-4.31539	-5.13003	-3.61239	-2.24674	-4.99495	-4.31545	-2.23686	-5.88807	-5.66175	-1.72167	-1.95147	-1.68626	-1.47002	-1.80896	-2.10341	-4.52121	-1.86012	-1.23364	-2.00901	-1.89092	-2.0535	-3.53238	0.905266	1.47225	0.262762	other_trend	0.00501618	0.0106779
CUL2	-	-4.46969	-4.97574	-3.98342	-4.35683	-6.59354	-5.51275	-3.47985	-2.70625	-2.26153	-4.03225	-2.4895	-2.67421	-3.43552	-3.83275	-2.90225	-5.06031	-4.54615	-2.10538	-2.13788	-4.41377	-5.16322	-4.32243	-3.75232	-4.6598	-2.32277	-5.03115	-4.96441	-2.87341	-2.55242	-2.23552	-1.75757	-2.3248	-1.94133	-2.20925	-1.63491	-2.20551	-6.64417	-1.91356	-1.95319	-2.5888	-2.51731	-3.7949	1.47707	1.19627	0.00326385	linear_increasing	0.0088817	0.017191
MYO18A	-	-2.5526	-3.24341	-2.73165	-3.49237	-6.5196	-2.87885	-2.82197	-4.72385	-2.63811	-3.65649	-4.4037	-2.6758	-3.8708	-6.95069	-3.29455	-2.51005	-2.2326	-2.53702	-2.21125	-4.12874	-4.29773	-2.56694	-5.74794	-6.71166	-4.9484	-4.55743	-4.84029	-4.92907	-6.53262	-2.22335	-2.47367	-2.77507	-2.86057	-2.56219	-2.08295	-2.60343	-5.04168	-2.03386	-2.13995	-1.93185	-2.65052	-3.91432	0.900501	1.46854	0.546631	other_trend	0.014819	0.0262266
ITGA3	-	-5.23293	-3.18484	-2.85501	-4.23549	-7.3292	-4.62915	-3.4802	-4.52544	-1.84011	-2.03276	-3.66363	-3.30754	-3.50474	-4.3632	-2.14635	-3.35349	-1.27646	-5.62406	-2.35723	-5.11445	-0.694089	-2.44689	-4.91231	-4.12706	-4.32018	-4.82383	-6.15232	-3.98656	-7.02293	-0.551417	0.223959	0.791955	0.54468	1.97606	0.730757	1.59976	-0.0963369	1.27394	0.495784	2.23653	0.977708	-3.7698	0.766883	1.6813	6.46419e-05	linear_increasing	2.01345e-10	4.55276e-09
SDHB	-	-1.86242	-2.06212	-1.88862	-1.9633	-5.52273	-1.7793	-3.04614	-5.81858	-2.04028	-1.29358	-5.29361	-2.10758	-5.66237	-4.73738	-5.8993	-6.85545	-4.65417	-2.68632	-6.33125	-4.39653	-0.627575	-4.40527	-1.72235	-2.23042	-3.34412	-5.18762	-2.37624	-4.36194	-2.23924	-3.31119	-2.41025	-0.970025	-1.87409	-1.84686	-4.7053	-1.98263	-1.72428	-1.55924	-0.988279	-1.93178	-1.99927	-3.52357	1.04806	1.75048	0.266702	other_trend	0.0135482	0.0243361
HNRNPUL1	-	-1.08942	-1.8193	-1.92459	-5.18722	-5.36514	-2.35855	-4.65952	-2.14104	-1.13473	-1.42807	-5.18031	-1.73685	-3.41122	-4.9641	-4.1049	-4.03057	-1.47235	-1.56843	-1.51661	-5.42756	-2.79844	-5.57844	-5.84308	-4.64922	-4.36445	-4.68979	-4.55003	-3.10565	-5.8687	-4.47318	-0.910214	-0.40619	-1.1183	-1.18749	-1.08089	-1.43515	-2.33972	-1.3805	-1.33201	-1.69806	-1.28885	-3.54805	0.50646	1.63559	0.245033	other_trend	0.000126842	0.000464363
HLA-A	-	-2.98897	-0.225213	-0.085485	-0.195815	-5.17537	-1.29234	-4.98999	-7.03529	-4.05162	-3.94303	-5.82438	0.0979308	-4.74176	-5.98753	-3.99178	-1.00145	-3.15503	-4.15892	0.34996	-3.28687	-1.07806	0.0462901	-3.83447	-3.88147	-4.95744	-4.66397	-3.25456	-0.653813	-5.13704	1.36625	1.37635	0.156336	-4.55181	-1.10047	-1.35354	0.365717	-0.218331	-0.133856	0.399431	0.337138	-0.472303	-2.92437	1.63036	2.2834	0.0365396	linear_increasing	0.00337062	0.00762158
DPP3	-	-1.98695	-4.99461	-5.60092	-6.47166	-4.42967	-3.96739	-1.72682	-4.51106	-1.62532	-1.50005	-1.92154	-2.40693	-4.14225	-2.96117	-2.13631	-4.94012	-4.61622	-4.15218	-1.20053	-1.57988	-5.23936	-3.89889	-4.79874	-0.479049	-4.56072	-2.91699	-2.7048	-2.28394	-1.58097	-5.73456	-1.87183	-0.647647	-1.80285	-5.51939	-1.51339	-1.80025	-1.22564	-1.59271	-1.77801	-1.73409	-1.94858	-3.36899	1.30835	1.61068	0.0244074	linear_increasing	0.0161085	0.0280185
ALDH5A1	-	-2.95306	-2.73384	-3.17311	-5.02794	-4.2161	-3.95632	-4.57477	-4.74037	-3.38763	-3.83995	-6.63472	-5.41595	-3.76719	-4.48024	-5.18543	-3.81465	-2.61589	-2.96443	-3.39054	-5.21231	-3.8571	-5.57967	-6.95891	-4.00605	-3.72215	-3.09734	-3.86325	-5.84763	-4.10202	-2.57956	-3.22357	-2.93912	-2.51676	-2.89682	-2.62913	-2.85127	-3.44423	-3.27899	-3.96786	-3.13371	-3.08815	-4.18994	0.422905	1.14182	0.0936205	other_trend	0.00523874	0.0110404
SFTPC	-	-2.72378	-5.31558	-3.14112	-7.08149	-1.86695	-7.011	-2.9644	-3.30191	-5.40419	-0.473213	-6.73351	-1.3836	-6.10624	-4.77317	-5.44323	-3.9109	-0.820541	-1.07563	-1.05284	-1.83298	-6.19725	-4.48598	-6.07386	-3.28064	-4.74272	-0.358475	-0.624873	-4.78736	-5.17095	0.743117	-0.063141	-0.223423	0.0759503	-0.481787	-0.38733	-2.60631	0.682417	-0.206159	-1.00575	-1.49884	-0.571437	-3.57984	0.927092	2.28143	0.000486381	linear_increasing	0.000256922	0.000866323
STK24	-	-2.11995	-4.6007	-2.11204	-4.66624	-2.12381	-5.81881	-3.72324	-4.91433	-1.89168	-2.12525	-1.89533	-1.6747	-5.59604	-2.93715	-1.3723	-4.48185	-1.90613	-1.88933	-1.83156	-4.81096	-3.58693	-3.81746	-4.21252	-3.12462	-4.53908	-2.77121	-4.38829	-5.52834	-1.72567	-1.8026	-1.32479	-1.66745	-1.43046	-1.53314	-1.63526	-1.62606	-2.15101	-1.55101	-1.39796	-1.81071	-1.61279	-3.26627	0.236882	1.40941	0.0171203	linear_increasing	0.000759381	0.0021784
FARSA	-	-2.10038	-1.96536	-2.259	-3.24278	-2.17683	-7.61381	-4.38168	-3.5068	-2.18814	-5.41471	-3.07719	-6.48835	-6.28578	-5.17626	-3.23208	-2.91108	-2.37312	-2.04518	-2.01936	-3.46974	-2.34144	-5.24995	-2.21727	-5.94808	-3.17368	-2.1487	-4.22441	-3.15376	-4.28541	-1.65672	-1.79988	-2.02489	-1.94057	-1.79244	-1.65666	-2.26401	-1.6647	-2.1138	-1.87639	-1.82347	-1.89568	-3.54423	0.19375	1.6083	0.0350838	linear_increasing	0.00272752	0.00635367
SSRP1	-	-2.04972	-2.15636	-2.37677	-5.06835	-2.50401	-2.38199	-2.4429	-3.72512	-1.80938	-2.29498	-4.36247	-4.34843	-4.2503	-5.73667	-3.28924	-4.99188	-3.71117	-4.43894	-2.29884	-4.47811	-4.58696	-4.35534	-4.81532	-4.40415	-1.37818	-2.58834	-4.93324	-4.65205	-4.39784	-3.92412	-2.17355	-2.01399	-3.00945	-1.98524	-1.91883	-1.46613	-2.15626	-2.02138	-1.47012	-5.23501	-2.345	-3.62504	1.10161	1.19867	0.540755	other_trend	0.0050056	0.0106779
CDH5	-	-4.79742	-4.84686	-4.53586	-6.6454	-1.38834	-5.52552	-5.07361	-3.57996	-1.55612	-2.09107	-2.23332	-6.36107	-5.49896	-8.24939	-5.31342	-4.40917	-1.37712	-4.48034	-6.38232	-2.83506	-1.32378	-1.2646	-4.35549	-2.95611	-1.90727	-1.59135	-5.54508	-3.45538	-5.43984	-1.10358	0.596599	-0.57852	-0.415495	0.170762	-0.774063	1.01515	-0.997316	0.0622008	0.362209	0.275265	-0.0283211	-3.87076	0.642872	1.9692	3.73093e-05	linear_increasing	5.37261e-07	4.33872e-06
BCAT2	-	-0.456456	-3.87261	-1.50233	-5.21351	-0.679128	-5.15786	-3.42356	-3.28944	-0.540064	-4.23783	-3.08214	-4.48194	-4.21213	-3.9684	-6.38143	-4.46336	-1.09178	-0.74055	-0.316797	-3.40683	-4.59732	-5.98329	-4.8907	-1.98018	-0.669175	-1.51562	-5.218	-4.03402	-4.50225	-0.294957	0.339825	1.07155	0.897582	0.32245	-0.959648	-0.132533	-1.33916	0.706575	0.0580656	-0.181679	0.078303	-3.14012	0.773123	1.90495	0.00372538	linear_increasing	7.89518e-06	4.33558e-05
ANP32E	-	-1.44969	-1.16995	-1.49352	-4.35269	-1.41123	-3.4904	-3.29205	-4.62488	-1.31341	-1.84701	-3.90531	-1.334	-4.70417	-3.82115	-4.97103	-4.47583	-0.804526	-1.39873	-1.56397	-5.34893	-5.50037	-3.00523	-5.24358	-3.83384	-4.25606	-5.70105	-3.26799	-4.29471	-4.34293	-1.26187	-1.40409	-1.68927	-0.781661	-0.870133	-1.17096	-0.989425	-1.23418	-0.840947	-1.36751	-0.894635	-1.12428	-3.24934	0.298906	1.5896	0.229123	other_trend	0.000170962	0.000606631
TUBB8	-	1.97891	1.70257	2.25803	-4.17734	1.78058	-6.39838	-6.21735	-1.95386	1.08948	-3.59095	-3.88873	2.04399	-3.78732	-4.93618	-3.61323	-2.62428	2.16748	1.80249	-5.48234	0.635935	-4.85174	-4.21098	-4.41866	-5.6538	-6.34321	1.05592	-6.83777	-3.49692	-5.01284	1.92139	2.61927	2.57878	2.5557	3.0943	2.32029	2.29901	2.54882	3.01983	2.61631	2.69456	2.63469	-2.30197	0.256472	3.26598	0.0768149	other_trend	3.03671e-05	0.000134793
SPON1	-	-1.36081	-4.82349	-0.459432	-1.77074	-0.448909	-4.23833	-0.773843	-5.38597	-0.506737	-0.184595	-5.3392	-0.316348	-0.658711	-3.30482	-3.65371	-5.98998	-0.00141666	-5.55912	-4.10955	-6.64192	-4.64653	-5.63599	-6.69553	-4.2801	-1.83275	-1.32952	-2.34752	-4.13237	-1.22304	-3.28083	-0.0400858	-0.930587	0.796344	0.157958	-0.125357	0.368834	-0.713244	-0.280837	-1.19439	-0.464379	-0.242575	-3.03106	0.607349	2.18526	0.106097	other_trend	0.000324407	0.00105323
HCFC1	-	-1.53092	-1.99489	-2.45771	-4.23205	-1.8556	-4.29684	-6.01993	-2.32001	-1.97053	-4.38653	-4.16617	-1.7935	-4.97833	-4.32213	-4.55419	-4.91573	-2.16416	-4.72766	-1.98574	-3.94571	-3.36607	-4.39812	-5.74814	-2.15955	-3.46095	-1.96453	-3.4757	-3.29876	-5.65216	-2.14806	-1.67804	-1.41575	-2.03238	-0.933047	-2.53419	-2.03518	-2.88034	-1.84399	-1.63092	-1.26966	-1.82535	-3.47635	0.580706	1.35959	0.108251	other_trend	0.000673408	0.001973
TJP2	-	-5.62954	-5.60666	-0.971077	-0.418448	-0.206335	-3.66287	-5.43521	-3.81669	-6.88446	-4.02174	-1.28944	-1.26502	-3.61874	-5.48989	-4.80768	-1.00391	-0.963316	-0.438829	-1.58343	-4.98622	-4.40332	-4.49264	-3.8661	-4.79793	-3.13052	-0.279009	-3.05403	-5.68441	-4.0987	-1.26818	-0.133503	-0.332886	0.156942	-0.433151	0.551368	0.484417	0.623983	-0.209035	-0.246743	0.594823	0.105621	-3.23914	0.423706	2.01027	0.00151984	linear_increasing	7.54797e-06	4.18075e-05
LRRFIP1	-	-1.88276	-5.16317	-3.90611	-5.03234	-1.66448	-5.34082	-2.5261	-4.47125	-2.14012	-1.93618	-4.41759	-2.24582	-4.87902	-4.53607	-4.51749	-2.34251	-4.63031	-6.02258	-1.78227	-2.27261	-1.91508	-5.52822	-5.66839	-4.03997	-3.07794	-2.20723	-5.65156	-4.48392	-4.71165	-1.48513	-1.725	-1.52076	-2.21583	-1.88418	-1.69412	-1.8322	-5.63224	-1.42387	-1.23339	-1.4101	-2.05717	-3.68262	1.28734	1.48899	0.0674542	other_trend	0.00380273	0.00847893
RPL22	-	0.165646	-3.73717	-0.054815	-5.3845	0.71532	-5.16373	-3.77347	-5.42851	-0.246177	-0.270411	-4.80625	0.161226	-3.60283	-4.25338	-5.07586	-4.39957	0.183105	0.871899	1.17793	-3.36138	-5.02888	-3.88429	-3.74776	-4.47866	-3.94291	0.562342	-5.86412	-3.50809	-5.69664	-0.159491	0.680614	0.605941	1.04812	0.854689	0.548128	0.336747	0.541093	0.591942	0.458973	0.749979	0.641623	-2.73438	0.203524	2.43549	0.0344671	linear_increasing	0.00010146	0.000386152
COPS2	-	-2.24093	-2.7262	-3.1342	-5.05577	-2.03412	-4.9945	-4.15177	-4.89503	-2.99887	-7.05456	-4.02606	-2.26512	-3.75706	-3.71749	-5.60058	-3.6153	-2.07749	-2.42148	-4.09914	-4.1016	-5.19507	-3.34629	-3.23397	-4.6493	-7.16754	-2.68172	-3.89978	-6.65854	-4.9714	-2.51746	-2.0559	-3.71852	-2.00149	-2.07361	-2.26781	-2.49355	-2.65624	-1.92396	-3.98245	-2.23479	-2.54083	-3.97628	0.728305	1.43234	0.245782	other_trend	0.00446839	0.00969327
ITPR3	-	-1.43799	-2.15017	-4.80136	-1.96057	-1.4961	-4.71909	-5.65605	-2.4271	-2.79869	-1.95099	-5.81916	-2.08704	-4.2325	-5.69841	-6.25089	-5.28928	-2.36779	-1.63227	-2.31828	-4.97082	-3.98348	-3.01463	-5.14646	-4.73485	-5.92839	-1.58489	-5.22018	-6.36079	-5.66294	-2.28168	-1.72106	-2.27051	-1.93897	-1.94312	-2.67076	-2.31641	-2.8605	-1.87447	-3.35352	-1.38901	-2.23383	-3.79943	0.589042	1.71262	0.55942	other_trend	0.00769601	0.0151555
MYO6	-	-1.82351	-3.85988	-1.78141	-4.22929	-6.33398	-5.23869	-4.28062	-5.46271	-1.59111	-1.61912	-3.82562	-1.82186	-2.85113	-4.19921	-2.19347	-4.62165	-1.63617	-1.69006	-1.66795	-4.91356	-6.26309	-3.03092	-4.97078	-1.723	-5.36059	-1.98492	-4.47733	-5.23632	-1.84882	-1.11695	-1.22785	-1.17036	-0.882643	-1.2987	-1.45843	-1.35391	-2.29611	-1.10794	-1.06456	-1.68121	-1.35417	-3.38846	0.397874	1.65007	0.00524517	linear_increasing	0.000465411	0.00142667
LBR	-	-1.24509	-2.49834	-1.88914	-1.7938	-4.5473	-5.37839	-5.60504	-2.63064	-1.64235	-2.1453	-5.49181	-1.42682	-4.29616	-4.10879	-2.72209	-4.20671	-1.95374	-5.8903	-1.33084	-2.36101	-4.76568	-2.20636	-5.77208	-4.77001	-4.41505	-4.46457	-5.53949	-3.61355	-3.88893	-1.75577	-1.43992	-1.59075	-1.57733	-1.28974	-1.88838	-1.73127	-2.30554	-1.52498	-2.01533	-1.64326	-1.70065	-3.47851	0.298024	1.55745	0.16468	other_trend	0.00102103	0.00279945
LRG1	-	-1.16943	-0.983874	-4.81946	-3.79505	-4.41624	-4.47852	-4.71008	-4.4852	0.168795	-4.73687	0.314403	-4.61203	-3.19116	0.756488	-4.26036	-5.40844	-1.19744	1.582	-0.953448	-5.00689	0.0697294	-3.78251	1.67443	-6.19063	-3.40024	-1.23383	-4.34471	-4.20309	-4.75246	-0.00918188	-2.81103	-0.433126	-0.0871951	0.538856	0.0586197	-6.1048	2.10334	0.644738	1.24409	-1.6163	-0.64628	-2.71918	2.36837	2.34572	0.0762508	other_trend	0.0206769	0.0345274
hCG_2043426	-	-2.02545	-6.08603	-3.35068	-2.16279	-4.27688	-6.72698	-1.28204	-4.75286	-1.86643	-5.35848	-1.97193	-2.65356	-4.48469	-3.4912	-7.54006	-5.24597	-2.03997	-1.79164	-2.26712	-4.98842	-2.40248	-4.93494	-5.42877	-3.41786	-2.48764	-4.98075	-4.60199	-4.47315	-2.58626	-1.27591	-1.84017	-1.66297	-2.0426	-1.52369	-2.02607	-2.2503	-1.95917	-1.93215	-1.97329	-1.64575	-1.88562	-3.69843	0.219288	1.69632	0.0151708	linear_increasing	0.00187902	0.00465998
GMFG	-	-5.73231	-0.6195	-1.34448	-4.97402	-3.68926	-5.36518	-3.86116	-4.02001	-0.316759	-0.583017	-0.511794	-0.474904	-5.70302	-6.74903	-4.51777	-2.17931	-0.458193	-4.81621	-0.637904	-0.658709	-5.04879	-0.690648	-5.53464	-3.54088	-4.49865	-6.02217	-2.5672	-5.19901	-0.575195	-0.761218	-0.0278223	0.278574	-0.101712	0.446937	-0.781975	-0.347114	-0.532855	0.319649	0.103183	0.330144	-0.0312992	-3.05503	0.410475	2.21157	0.00688231	linear_increasing	0.000128274	0.000467365
GPD2	-	-3.94414	-3.36877	-0.358529	-4.01132	-3.06542	-4.09904	-2.31831	-4.17349	-1.4862	-4.4894	-6.27122	-0.543984	-4.04195	-3.72102	-4.37372	-4.30235	-0.672735	-0.076718	-0.452475	-0.776486	-2.33624	-1.00896	-6.28602	-1.56135	-1.58531	-0.701383	-3.60642	-1.50326	-4.32696	-0.0681768	0.24353	1.25579	0.438864	-0.265949	-0.493491	-0.0414184	-1.2301	0.155065	-0.112389	-0.0229659	-0.00730603	-2.65104	0.640722	1.8362	0.000114413	linear_increasing	7.71789e-05	0.000305851
GPD1	-	-0.0116135	-4.13256	-4.08927	-6.04715	-3.67993	-2.72293	-4.86799	-4.89412	-6.06676	-5.66147	-1.80151	-5.0928	-4.86975	-1.52148	-1.46805	-5.65038	-2.51525	-1.09073	-1.30176	-2.58731	-2.11996	-1.559	-0.905838	-3.69865	-4.94612	-0.41963	-6.24505	-4.43333	-4.56647	-0.768885	-0.678851	1.20692	-0.881485	-1.01597	-1.3564	-6.42127	-1.43303	-0.847973	-1.48123	-1.68719	-1.45965	-3.32453	1.92374	1.92641	0.011033	linear_increasing	0.0116083	0.0213913
FCN3	-	-5.532	-2.00021	-6.14943	-7.221	-3.68047	-5.17765	-2.29683	-3.83736	-4.73012	-3.56518	-3.63971	-3.64167	-3.62949	-2.25812	-2.19184	-5.03155	-2.58236	-2.31282	-4.51127	-2.6229	-3.52064	-1.48237	-3.53732	-1.44857	-1.5422	-2.88717	-4.10511	-1.79963	-2.29615	-2.21614	-1.60182	-4.84504	-5.51888	-0.782948	-1.48924	-0.139746	-0.962543	-2.07886	-2.48661	-0.218041	-2.01237	-3.38158	1.83579	1.4538	0.000463152	linear_increasing	0.0206632	0.0345274
OSBPL8	-	-2.87763	-2.86546	-2.87631	-2.52855	-3.90481	-4.06692	-5.78088	-5.12526	-2.60842	-4.87342	-4.67981	-2.56666	-4.7716	-5.13032	-3.17725	-4.59829	-2.68563	-6.13453	-2.71407	-3.97781	-2.95965	-3.90385	-2.65214	-5.22048	-6.55213	-2.80585	-4.28543	-3.30555	-3.42228	-2.81604	-2.79717	-2.91	-3.07587	-4.56678	-2.51612	-2.67999	-1.96481	-2.6745	-2.72843	-2.81936	-2.8733	-3.86223	0.664144	1.18256	0.178939	other_trend	0.0167721	0.0290676
NDUFA4	-	-0.234529	-0.644444	-0.758904	-0.882901	-2.46606	-5.61032	-3.0044	-0.583368	-0.413482	-0.462454	-4.95225	-0.226574	-4.83494	-3.94365	-5.49654	-2.94551	0.258998	-6.72305	-0.362338	-0.472105	-6.27883	-4.89686	-5.52931	-4.93428	-3.93395	-4.53092	-5.70638	-5.23488	-5.47759	0.128422	-0.317436	-0.20716	-0.68499	-0.270939	0.131161	0.168226	-5.33449	-0.553846	-0.624725	0.0970358	-0.759716	-3.03845	1.63718	2.38168	0.743645	other_trend	0.00796761	0.0156422
DYNC1LI2	+	-5.5687	-4.11979	-1.8461	-5.20343	-2.55959	-4.72334	-6.19581	-4.5857	-1.76564	-2.35187	-3.82226	-1.98025	-4.14678	-4.79098	-1.77541	-3.03668	-1.30977	-3.62493	-1.30816	-4.70275	-3.67302	-5.49818	-4.93901	-1.77358	-2.05312	-6.4344	-2.2372	-5.31486	-0.919438	-2.17013	-0.822972	-1.32917	-0.700225	-0.927783	-2.75391	-1.10169	-1.48131	-1.13412	-1.30321	-1.14025	-1.26946	-3.48103	0.573145	1.63252	0.000500455	linear_increasing	0.000171069	0.000606631
ARRB1	-	-1.50684	-5.30055	-4.09485	-3.75781	-1.77526	-4.26807	-2.0265	-5.44642	-1.60587	-3.61719	-1.68396	-4.99891	-3.67028	-5.23838	-7.29164	-1.15157	-0.392781	-4.26123	-1.63108	0.209717	-5.32543	-1.43583	-6.05632	-4.32994	-6.92162	-0.977338	-4.15465	-6.27901	-5.09041	0.170511	0.729725	0.958759	0.978357	0.88231	0.0714236	1.411	-0.405443	0.415897	0.593037	1.27549	0.691056	-3.46365	0.550125	2.14749	0.00157052	linear_increasing	5.61764e-07	4.49879e-06
C7	-	-1.92203	-5.30548	-1.83015	-2.18383	-2.13029	-4.8345	-2.55262	-3.63827	-1.0212	-4.42902	-2.53767	-5.98662	-5.07198	-4.04472	-2.69322	-4.6573	-0.578295	-2.30313	-3.86347	-2.96742	-5.04711	-5.64462	-5.92507	-7.96926	-6.26196	-6.89381	-3.86394	-1.31988	-2.51986	-4.34669	-0.999882	-1.65887	0.0757335	-0.925615	-0.312361	0.877769	2.60997	-1.27265	-1.16433	1.77644	-0.0993793	-3.81145	1.42698	1.85464	0.0256239	linear_increasing	1.18831e-06	8.40937e-06
LARS1	-	-1.89565	-2.3159	-1.69892	-1.9017	-2.99255	-6.27449	-5.42944	-5.06432	-5.07266	-4.95525	-2.57859	-1.87671	-4.73754	-4.21979	-4.63502	-2.63943	-2.42915	-2.06805	-3.71625	-2.27187	-5.41413	-4.32677	-5.05081	-3.20031	-6.44922	-4.46189	-4.99559	-4.80489	-3.72238	-1.74328	-1.76433	-2.06781	-2.32396	-3.47332	-5.80314	-2.21651	-2.47857	-1.70165	-2.03235	-2.13827	-2.59999	-3.76475	1.22859	1.46503	0.41919	other_trend	0.0297635	0.0471992
AEBP1	-	-3.57329	-4.58987	-2.54711	-0.137081	-1.23914	-4.83945	-4.00279	-2.46538	-4.1328	-3.33791	-1.18624	-0.489782	-0.606883	-4.8386	-0.913885	-5.69341	0.127521	-0.944243	-4.08643	-4.70367	-6.37103	-6.74537	-3.6982	-3.72266	-0.66814	-0.0208332	-4.10062	-0.43877	-4.43557	-1.10595	0.0482761	-1.43218	0.624077	0.116306	-0.377222	-0.388545	-0.652421	0.146145	0.0477264	1.57851	-0.0289325	-2.85025	0.79459	2.05348	0.00715917	linear_increasing	0.000150532	0.000540789
BRK1	-	-1.65506	-4.56164	-2.46371	-3.65316	-2.48146	-5.19323	-7.03427	-5.21363	-2.21974	-5.78519	-4.56546	-2.38429	-7.23316	-1.96433	-5.20103	-3.51643	-1.59367	-2.26352	-1.7447	-3.16973	-5.98004	-2.60132	-4.05403	-2.92809	-2.50242	-5.75319	-4.79164	-2.64407	-3.44562	-1.95761	-2.23533	-1.66015	-1.87709	-1.7993	-2.03704	-1.57202	-2.16189	-1.66242	-1.78597	-1.25821	-1.80494	-3.68518	0.291845	1.65218	0.00628107	linear_increasing	0.00104426	0.00284288
F11R	-	-1.98901	-5.94007	-4.90586	-4.46856	-1.49233	-6.10714	-3.44012	-5.69436	-2.67477	-4.04459	-3.58456	-1.7565	-4.85617	-4.38804	-4.6518	-1.71527	-1.51751	-1.8626	-3.88542	-1.34606	-2.39272	-5.8532	-4.89585	-4.17756	-7.08371	-0.701687	-5.02251	-1.70059	-1.59247	-1.23817	-0.54	-0.971741	-0.343122	-0.645313	-0.862416	0.436941	-1.01259	-0.65217	-0.5528	-0.348004	-0.549122	-3.49931	0.417231	1.79575	4.44615e-05	linear_increasing	9.48156e-06	5.02027e-05
ELN	-	-1.18609	-2.25238	-4.97477	-1.5163	-1.079	-2.024	-6.75302	-4.66449	-1.58926	-4.54736	-3.59837	-1.14452	-3.62364	-4.55997	-4.51567	-4.9325	-2.21669	-1.4204	-4.86945	-1.44106	-1.55036	-4.35082	-4.33057	-5.62332	-2.0371	-1.58097	-3.80964	-2.83884	-4.30003	-1.58484	-0.277695	-2.21695	2.27961	0.221333	0.180855	0.353643	-0.0707168	-0.816619	0.731424	-0.632846	-0.0247962	-3.16385	1.15453	1.62534	0.00327798	linear_increasing	1.83357e-06	1.21104e-05
PGRMC2	-	-0.423068	-0.409658	-0.396687	-0.900103	-0.777179	-4.18449	-4.225	-6.06895	-0.568627	-4.46354	-1.28081	-0.721217	-3.24188	-3.94659	-6.19414	-5.04558	-0.161778	-0.649534	0.0208646	-5.40474	-6.19911	-4.90346	-5.82773	-5.98684	-4.18051	-4.64235	-3.1134	-1.9001	-4.22504	-0.107138	-0.613477	-0.396362	-0.494264	-0.316939	0.121768	-0.192083	-3.92008	-0.469248	-0.507674	-0.428914	-0.721727	-3.00428	1.14261	2.25747	0.401478	other_trend	0.00414752	0.00910847
GYG1	-	-1.09226	-0.56231	-0.96475	-0.922934	-0.983362	-4.83071	-5.1892	-3.95205	-4.7158	-0.752149	-5.14548	-5.19456	-4.84883	-3.72779	-3.41229	-3.2876	-0.952972	-2.78234	-1.49498	-5.04539	-5.29358	-5.90958	-4.2667	-1.80601	-3.7199	-1.16659	-3.37394	-4.42778	-1.53623	-0.912658	-0.143635	-0.540138	-0.932585	-0.912786	-0.0758165	-1.08893	-0.441624	-0.380897	-0.191676	-0.701196	-0.540928	-3.07569	0.357348	1.78693	0.026952	linear_increasing	7.98468e-05	0.000315125
SAE1	-	-1.85671	-4.94365	-2.23684	-5.04157	-2.02279	-4.77927	-7.12691	-3.23478	-2.26185	-6.84611	-1.72398	-2.15985	-4.82023	-5.88098	-3.80244	-3.54272	-2.30299	-2.25494	-2.76684	-1.88781	-5.04834	-5.52272	-3.66778	-5.36693	-2.33018	-2.87084	-4.17545	-3.44679	-2.85167	-2.30568	-2.03483	-2.10365	-2.03708	-2.05276	-1.5768	-1.99208	-1.92859	-1.87752	-2.09208	-1.80393	-1.94993	-3.63599	0.162354	1.56053	0.0114267	linear_increasing	0.00168172	0.00426421
ROCK1	-	-2.60603	-3.17628	-2.91789	-3.08876	-2.73749	-3.99644	-6.69252	-3.81837	-2.9199	-3.11581	-4.87783	-7.62709	-5.16934	-4.1213	-3.2462	-5.54027	-3.89356	-3.36867	-2.93187	-3.85845	-3.76846	-4.1764	-5.4645	-4.61738	-3.24841	-2.65966	-5.67358	-4.20702	-3.28938	-2.78812	-2.24562	-2.89344	-2.76081	-3.13267	-2.71745	-2.67798	-3.1227	-2.80682	-2.61189	-3.09068	-2.80601	-3.98657	0.273592	1.2464	0.101309	other_trend	0.00545282	0.0114289
TAP1	-	-1.67966	-2.55911	-4.27136	-4.33671	-1.73967	-6.66778	-4.86023	-5.6165	-3.94441	-1.84139	-4.70623	-7.37961	-2.39617	-4.11167	-4.95383	-1.28226	-1.48623	-3.03532	-1.62291	-1.40817	-1.81073	-2.30965	-5.02736	-4.11485	-5.3989	-3.04722	-5.53634	-4.45533	-2.95204	-1.17273	-1.73333	-1.80138	-4.64465	-1.83677	-2.7703	-1.13506	-1.2225	-1.32577	-3.33515	-1.5375	-2.13424	-3.52415	1.12291	1.72964	0.044901	linear_increasing	0.0230233	0.0379184
DYNLRB1	+	-0.763287	-0.916421	-0.492372	-0.271151	-0.268703	-0.559701	-5.15657	-4.61133	-6.21605	-4.51376	-4.42703	-0.718512	-3.56149	-5.59097	-3.69793	-5.45869	-5.79771	-1.06317	-0.19709	-1.02446	-0.675711	-4.64278	-4.8877	-1.33071	-5.14623	-5.50672	-5.80075	-4.3325	-5.18835	-1.68557	0.0325552	-0.543563	-0.316838	-0.357207	-0.158235	-0.272794	-0.717655	-0.0235523	-0.337667	-0.191574	-0.288653	-3.15011	0.225353	2.20749	0.215534	other_trend	0.000238315	0.000816473
TLN2	-	-1.14365	-3.20729	-2.58553	-4.11577	-1.16979	-2.91071	-6.05941	-5.33623	-1.18231	-4.44427	-2.11258	-1.65293	-6.48899	-4.66199	-5.13466	-3.20753	-0.974624	-0.823281	-3.23164	-2.43151	-7.50402	-3.90035	-3.58336	-1.94418	-5.7088	-1.32752	-3.44919	-3.76077	-4.62861	-4.50114	-1.10321	-2.02984	-1.62459	-1.58355	0.425177	-0.992598	-1.60105	-1.30011	-0.977394	-5.26665	-1.60538	-3.43942	1.44623	1.78505	0.169296	other_trend	0.00562097	0.0117175
MANF	-	-0.334389	-0.315352	-0.0326065	-0.353861	0.00532038	-5.36796	-7.0339	-3.70352	-4.13068	-5.09614	-5.29747	-0.860303	-4.47599	-4.52612	-3.21574	-3.99485	-1.29789	-0.445494	-0.386024	-1.14603	-1.12207	-4.34076	-5.8722	-4.39883	-5.81212	-0.575523	-4.8702	-2.56088	-4.36991	-5.56881	-0.53452	-0.769776	0.249094	-0.635393	-0.880708	-3.92362	-1.74975	-1.03651	-1.03777	-0.956938	-1.12759	-3.05001	1.10195	2.22602	0.518886	other_trend	0.0128855	0.0233485
HMOX1	-	-0.0315836	-6.22314	-4.28236	-5.63017	0.858708	-4.59102	-4.73236	-0.351712	0.645067	-4.6365	0.793558	0.171	-5.14299	-3.99217	-3.15058	-1.53879	-0.994686	-1.04665	-0.674948	0.800167	-5.21018	-6.63694	-5.39502	-4.4587	-3.13567	-6.17617	-5.93916	-3.1732	-3.49445	-1.1516	-1.62695	0.819999	-0.334523	-0.632878	-3.83823	-0.765038	-0.832565	-0.827732	3.12627	0.0299083	-0.488174	-2.95074	1.76127	2.48698	0.153086	other_trend	0.00637457	0.0129376
LYPLA2	-	-2.02073	-4.79686	-4.92525	-2.56712	-5.58859	-6.02545	-2.69248	-2.40415	-2.77228	-2.31794	-2.02041	-1.93845	-5.58507	-3.66579	-4.98631	-4.7152	-2.69683	-2.42961	-2.33447	-3.51582	-4.74637	-6.59178	-5.64082	-4.48263	-6.66376	-2.53053	-4.15016	-5.21694	-5.14455	-2.2497	-2.18523	-1.60042	-2.32593	-2.29982	-2.98852	-2.10479	-2.63658	-3.09347	-2.19963	-1.43076	-2.28651	-3.91387	0.529375	1.5227	0.15038	other_trend	0.00217163	0.00527993
ARHGEF1	-	-1.88415	-5.0922	-3.08822	-3.2363	-4.99803	-4.02091	-4.99327	-5.57708	-5.89647	-2.55179	-5.41822	-3.86884	-2.8018	-2.68249	-3.45942	-2.80883	-1.85136	-5.36855	-2.55756	-3.31106	-2.51621	-4.40395	-5.73734	-3.3075	-2.56039	-2.22769	-3.27529	-6.17219	-3.13361	-1.55647	-1.09764	-1.08523	-2.0682	-0.869146	-2.46948	-1.74158	-2.56161	-1.13855	-1.34988	-1.10217	-1.54835	-3.67857	0.620761	1.35375	0.000213575	linear_increasing	2.63721e-05	0.000121552
RALA	-	-3.11749	-3.6283	-1.07221	-3.7107	-4.3811	-6.46823	-3.80645	-5.49092	-3.73132	-5.64893	-0.768055	-0.848806	-0.427331	-3.95763	-4.89901	-0.112047	-0.150544	-0.33886	0.990527	-5.61884	-3.72284	-6.59338	-5.75606	-4.11917	0.4113	-3.98357	-0.751464	-0.410893	-0.559839	-0.409426	1.27958	1.05044	0.950099	0.995882	0.183001	1.30055	0.466335	0.78561	1.09172	1.2654	0.936862	-2.76939	0.366785	2.33242	1.93701e-05	linear_increasing	1.49301e-05	7.43372e-05
GNA13	-	-1.94267	-2.64826	-2.39894	-2.52706	-4.54232	-6.4397	-4.4885	-3.57725	-2.31699	-4.05878	-5.05355	-2.13246	-3.97026	-5.91356	-4.58626	-2.54994	-2.27263	-4.15384	-2.17017	-2.36191	-5.75949	-4.05993	-2.24643	-5.05856	-2.12353	-2.24036	-5.79987	-3.61205	-3.8645	-1.63297	-1.50833	-1.4215	-6.25251	-1.25251	-1.66782	-0.831564	-2.37866	-1.35702	-1.55124	-1.55746	-1.97786	-3.55009	1.55076	1.40061	0.0647595	other_trend	0.00480817	0.0103486
MMP9	-	-4.48963	-2.30123	0.376897	-1.94226	-3.76155	-2.90745	-1.79355	-3.353	-2.11622	-3.14356	-5.49819	-4.5832	-5.9827	-4.93819	-6.04647	-2.33902	-5.0147	-5.18964	-3.242	-4.29133	-0.407605	-4.4557	-2.96369	-4.81095	-4.15264	-4.46046	-5.19333	-0.5335	-7.07845	2.27937	2.55996	2.27914	-6.05656	1.98197	0.139389	1.26509	0.107966	2.78564	0.35828	1.19729	0.661817	-3.4778	2.55889	2.06807	0.00719691	linear_increasing	7.88211e-06	4.33558e-05
ACE	-	-2.51869	-1.68077	-5.55099	-6.23044	-2.98389	-3.57597	-4.41779	-3.94072	-2.8214	-4.97697	-5.13015	-1.94137	-4.54716	-2.6385	-2.89829	-3.7089	-2.07832	-4.02044	-1.78579	-2.1879	-4.41792	-4.78221	-6.22078	-3.92212	-0.941891	-2.44931	-2.23953	-2.62067	-1.99837	-2.6328	-0.310394	1.57784	-0.778032	1.70123	-0.788602	-0.538675	-0.685344	-0.233712	0.0937071	1.33716	0.137518	-3.39534	1.00717	1.40103	2.57637e-06	linear_increasing	8.60972e-09	1.14916e-07
PACSIN2	-	-0.840582	-5.95459	-0.224794	-0.769809	-1.22528	-4.40967	-2.79219	-2.53402	-0.74977	0.188302	-1.92729	-3.00024	-4.37506	-2.20689	-5.74847	-1.57723	0.229592	-0.43129	-0.617589	-5.40568	-4.18581	-4.44823	-3.77002	-0.985286	-0.383891	-0.277195	-4.23124	-5.61322	-4.82025	-0.23613	0.858839	0.0515723	0.5718	0.631018	0.842516	0.784558	0.119141	0.589028	0.361172	0.370636	0.518028	-2.44413	0.286007	2.0416	0.0236755	linear_increasing	5.61406e-05	0.000232548
MYO1G	-	-1.30784	-5.45815	-1.68935	-5.93111	-2.24743	-4.79363	-4.85066	-2.17408	-1.73605	-1.91392	-4.82545	-0.763045	-1.54427	-3.08279	-3.68973	-5.83052	-1.75347	-5.52772	-0.936152	-1.91555	-1.8794	-2.28691	-4.10687	-5.42897	-4.02363	-6.44241	-4.79317	-4.31692	-2.42122	-0.805087	-1.86569	-0.917814	-1.73482	-1.78196	-2.27629	-1.94326	-2.30778	-1.67692	-2.15984	-1.40539	-1.80698	-3.28252	0.420611	1.77828	0.107309	other_trend	0.0139078	0.0249122
GIMAP1	-	-1.7597	-3.05867	-3.31117	-2.72884	-2.39205	-4.91777	-2.5684	-4.33544	-1.65987	-5.79454	-4.24125	-3.36399	-3.67856	-4.84925	-1.57575	-5.8126	-1.39551	-3.45379	-2.08635	-4.37619	-4.52799	-4.20178	-6.6777	-5.35348	-2.30669	-5.31658	-3.75886	-6.53666	-2.6181	-2.10471	-1.62506	-1.5106	-1.65063	-0.839407	-1.67212	-0.319919	-2.00842	-1.05155	-1.5382	-0.893632	-1.31095	-3.69207	0.512987	1.51645	0.0440718	linear_increasing	2.20446e-05	0.000103848
CPT2	-	-1.94206	-3.68094	-2.18862	-3.05727	-2.29903	-3.11929	-4.46847	-2.85749	-1.40484	-2.93761	-2.45777	-2.34293	-4.57893	-2.65809	-3.30893	-4.66207	-1.92722	-5.04339	-1.64842	-4.22991	-2.33897	-4.01725	-4.79931	-2.22775	-3.48931	-2.22042	-6.1843	-2.86095	-5.23293	-1.07911	-1.47056	-0.95287	-1.78109	-2.13193	-1.71232	-2.32889	-4.52433	-1.40107	-2.32576	-1.58911	-2.02179	-3.17545	0.979469	1.2649	0.289625	other_trend	0.0124027	0.0225739
KCNAB2	-	-1.88943	-2.68418	-2.76141	-2.3496	-2.81541	-5.12606	-4.85395	-4.24541	-2.84662	-2.85306	-4.48405	-2.43067	-2.5744	-4.48448	-3.6371	-4.26765	-2.73497	-6.77014	-2.19522	-5.18031	-2.49337	-5.39208	-4.96683	-6.05896	-3.42338	-4.78732	-4.9706	-3.06651	-5.77205	-2.44355	-2.35895	-2.30223	-2.92506	-2.56503	-1.82943	-1.79577	-2.76812	-2.49696	-2.45127	-2.18241	-2.36752	-3.81863	0.363494	1.34377	0.443905	other_trend	0.00184812	0.00460114
CPT1A	-	-2.31225	-3.42586	-2.5528	-2.443	-2.30544	-4.09258	-7.60603	-4.80145	-2.43266	-3.61483	-3.15425	-2.49567	-2.51578	-3.52489	-6.39977	-3.72683	-2.55344	-2.64565	-2.37061	-4.70039	-6.13354	-2.5733	-6.54013	-4.43228	-4.36846	-2.3585	-3.3099	-2.49784	-3.34684	-1.59004	-1.46232	-2.03867	-2.51572	-2.08658	-1.744	-1.71514	-1.93529	-1.67161	-1.63048	-1.48326	-1.82831	-3.56083	0.321721	1.48995	0.0271757	linear_increasing	0.000858142	0.00239383
EFEMP2	-	-5.15036	-5.50686	-0.856505	-1.64744	-1.70087	-1.54203	-6.06669	-2.93225	-4.30387	-5.23712	-5.00406	-1.42882	-1.9147	-4.53983	-5.48383	-4.87616	-0.926249	-1.19787	-1.04182	-0.978076	-6.67325	-6.3739	-3.21354	-1.54098	-6.04881	-0.832439	-4.90806	-3.71931	-4.83196	-1.50487	-1.21218	-1.59322	-0.708604	0.0238464	-0.432368	-1.62271	-4.88652	-1.35642	-0.830777	-0.947656	-1.35666	-3.39942	1.34294	2.02111	0.037323	linear_increasing	0.00511804	0.0108575
SLK	-	-1.56723	-4.65065	-0.585589	-5.01388	-1.61154	-1.84701	-5.97556	-4.73911	-0.929289	-1.32198	-5.26076	-1.00337	-6.21132	-3.67204	-4.34476	-6.88721	-1.47626	-5.52339	-1.53574	-0.714996	-2.02182	-2.83552	-5.06136	-5.80758	-4.81143	-5.69746	-6.41168	-2.38458	-5.29581	-1.16049	-1.26311	-1.3072	-1.76049	-1.23842	-1.60103	-1.24037	-1.4658	-0.924009	-1.33312	-0.930755	-1.30643	-3.54531	0.261898	2.07748	0.16496	other_trend	0.00173526	0.0043654
PCNA	-	-0.83784	-1.01558	-0.882622	-1.30422	-1.28952	-5.9622	-4.75066	-5.01757	-1.31218	-0.843458	-5.2182	-0.849856	-5.77531	-4.54416	-5.60836	-4.98182	-5.37347	-0.945851	-1.6133	-5.75113	-0.858892	-5.78391	-4.277	-1.22039	-4.20228	-1.42458	-4.02628	-5.83509	-3.88627	-0.746799	-0.980658	-1.39413	-1.42335	-1.4837	-1.53295	-1.74609	-0.938851	-1.32727	-0.535302	-0.895974	-1.22583	-3.20463	0.370768	2.09078	0.312462	other_trend	0.00537782	0.0113211
ACSL3	-	-1.93325	-2.3407	-2.69036	-4.91979	-1.45651	-3.28777	-3.60254	-1.59739	-1.11317	-1.19234	-5.42814	-1.87121	-3.26334	-4.40595	-5.23633	-3.80856	-0.991417	-1.04601	-3.4838	-3.56442	-3.96998	-2.84249	-3.50152	-6.53284	-3.43177	-1.21201	-4.74213	-5.13415	-6.09896	-1.44212	-0.566669	-1.46504	-1.75226	-1.15798	-0.920427	-1.4186	-0.627304	-1.08373	-1.04254	-1.11056	-1.11451	-3.2047	0.365949	1.61564	0.18333	other_trend	0.00026313	0.000884152
TKFC	-	-2.00865	-4.1222	-1.62529	-2.14299	-2.03689	-2.39699	-5.09815	-3.12008	-2.39077	-1.98581	-3.91837	-2.2117	-3.61604	-6.65681	-5.16574	-5.63346	-2.12161	-2.54993	-2.32671	-2.04033	-4.47713	-4.30056	-5.84301	-6.48705	-2.96745	-4.40029	-4.24111	-6.00356	-4.80644	-1.93999	-2.15511	-2.01563	-2.70883	-2.19987	-1.56933	-2.6911	-2.42102	-2.11776	-1.77708	-1.79363	-2.14494	-3.62117	0.380517	1.56045	0.710393	other_trend	0.00557743	0.0116647
EIF6	-	-1.52394	-1.13041	-1.87901	-3.88149	-1.04147	-1.94881	-4.95383	-3.44672	-1.05756	-2.33578	-3.85783	-1.41166	-0.601754	-4.14857	-4.76029	-6.79256	-1.0323	-2.09946	-1.88484	-1.86239	-5.02047	-6.35077	-4.92744	-3.75178	-5.52897	-1.67698	-4.51763	-5.26934	-3.68068	-1.17332	-0.907997	-1.05172	-1.28259	-1.46855	-1.11672	-1.23243	-1.30529	-0.716283	-0.824706	-0.749571	-1.06559	-3.11827	0.258695	1.80499	0.337776	other_trend	0.00103448	0.00282908
STAT5B	-	-0.337196	-4.1851	-0.55906	-5.45608	0.0782387	-6.82202	-3.38857	-2.97016	-0.414726	-4.51927	0.382625	-0.574351	-2.5143	-2.37978	-4.72475	-0.67758	-0.482439	-0.731691	-0.725001	-5.69264	-1.00255	-4.77749	-7.15186	-6.05093	-2.30491	-0.128175	-3.83967	-4.98137	-4.24074	0.310496	0.227542	-0.522502	-0.18857	0.207153	-2.01778	-0.497021	-0.810605	0.381491	0.0395143	-0.417177	-0.359795	-2.69537	0.699635	2.35407	0.108775	other_trend	0.00395583	0.00874925
RPL38	-	0.30836	0.0121999	0.20539	0.486616	0.68483	-3.40536	-4.4173	-4.95358	0.829175	-4.80872	-4.03402	0.654193	-5.6421	-4.238	-5.95076	-3.34954	-0.12228	0.133127	0.852671	-3.38023	-4.21252	-3.9328	-2.64878	-4.35967	-0.708072	0.376379	-5.34058	-5.52726	-5.16223	0.15387	0.388102	0.503554	0.6771	0.624802	-0.0164663	0.56844	0.639803	0.59485	-0.456738	0.51025	0.40337	-2.38323	0.362325	2.49719	0.263179	other_trend	0.00125068	0.00329289
SWAP70	-	-1.03401	-4.1615	-2.33811	-4.0036	-1.49052	-6.22432	-6.17061	-6.92993	-1.74953	-6.42034	-4.81096	-1.57871	-2.3669	-4.33518	-2.01353	-4.83326	-1.92075	-2.03532	-1.95675	-2.06736	-2.24497	-1.94505	-4.69644	-6.21589	-5.076	-5.47147	-5.22968	-6.17905	-3.9794	-1.6712	-1.7178	-1.80328	-2.06619	-1.67602	-1.84631	-1.81639	-1.97935	-1.87834	-1.7367	-1.56166	-1.8082	-3.70501	0.146762	1.87706	0.0840358	other_trend	0.00305137	0.00699015
S100A13	-	-0.227336	-4.55801	-0.166076	-0.259538	0.325785	-6.0073	-6.76331	-4.74352	0.292341	-5.08915	-3.52011	0.37098	-4.44647	-4.63022	-4.39376	0.0833319	0.478297	-0.199292	-4.4155	-5.79952	-0.10213	-4.90642	-1.07269	-4.29758	-4.35517	0.167894	-5.02086	-5.3238	-4.69095	-0.040669	-0.461609	-0.0838998	0.204721	-0.0213803	0.051773	0.477214	-0.261356	-0.0111304	0.105395	0.167225	0.0166951	-2.77703	0.257686	2.52365	0.0779225	other_trend	0.00133107	0.0034807
NACA	-	-4.17742	-0.425993	-0.857828	-3.24597	0.775416	-0.527967	-3.20307	-3.56563	0.820863	-6.76275	-5.22368	-0.159412	-5.23535	-5.06175	-5.24853	-0.740199	-1.10524	-2.91982	0.386029	-0.0477985	-4.98846	-3.48097	-4.12735	-4.66255	-0.349526	-3.84172	-0.709909	-2.26822	-4.67565	0.600087	0.505143	0.621034	0.771257	-0.304577	0.538101	0.376233	0.173354	0.196738	0.878085	0.184581	0.393995	-2.50101	0.346587	2.26196	0.0189181	linear_increasing	0.000284319	0.000947074
CCAR2	-	-1.07237	-1.56619	-4.91224	-2.3532	-0.76331	-4.29699	-5.40088	-2.56416	-1.26098	-3.0545	-5.40876	-0.737821	-1.77911	-5.67598	-2.06642	-5.76347	-1.84119	-3.18043	-1.94119	-2.00651	-3.56742	-3.98629	-4.15096	-4.48888	-1.95715	-1.67143	-4.42081	-3.89912	-1.75475	-1.87534	-1.30971	-1.5424	-1.45544	-1.3899	-1.4391	-1.82484	-1.2086	-1.34721	-1.73295	-1.32645	-1.45766	-2.9806	0.193238	1.55803	0.0788015	other_trend	0.00407906	0.00899078
CTSL	-	-3.3142	-0.978688	-3.03212	-0.261923	0.542538	-4.25915	-5.85057	-5.6326	0.21246	-1.57283	-5.1666	-1.0966	-3.31062	-4.54879	-3.69925	-2.82641	-0.463806	-0.993046	0.907337	-0.937099	-1.11892	-2.24302	-4.69048	-4.1128	-2.67782	-4.52171	-5.30122	-4.87971	-5.32592	-0.758642	-0.919893	2.04541	-0.181879	-0.821578	-1.51225	-0.81067	-0.628082	-0.456988	-0.154485	-0.101974	-0.354239	-2.73041	0.946619	2.05321	0.0945452	other_trend	0.00115836	0.00310511
GPRC5A	-	-4.73525	-4.81847	-4.56728	-5.77831	-7.06055	-3.67127	-1.42708	-4.00006	-2.27664	-1.5006	-1.53751	-4.89467	-2.88085	-3.35091	-1.67687	-0.794027	-0.98266	-5.67624	-4.08227	-2.72933	-4.96262	-2.02727	-3.35602	-0.742351	-2.96921	-2.21428	-1.29709	-0.746042	-1.02705	-0.35012	-0.122027	-0.414408	0.408754	0.944868	0.215157	1.16841	-0.697183	0.302685	0.478911	0.96163	0.32468	-2.93776	0.608783	1.80092	7.53861e-09	linear_increasing	2.13896e-06	1.37036e-05
PTGR1	-	-1.79143	-2.11939	-0.164146	-1.72866	-4.95413	-4.9665	-4.74076	-1.84899	-1.54373	-1.39688	-5.73935	-1.20272	-4.90173	-2.28278	-4.68397	-2.90292	-1.26077	-4.93819	-1.69825	-4.37168	-4.60253	-2.15269	-3.99479	-5.93645	-1.95562	-1.7434	-4.51035	-4.76638	-4.54405	-1.16943	-1.05619	-1.04347	-1.39985	-0.920947	-5.20113	-1.32983	-1.71073	-0.876427	-2.48178	-1.36401	-1.73844	-3.15376	1.30491	1.6886	0.403005	other_trend	0.0207326	0.0345604
GAL3ST4	-	-6.77487	-0.55717	-0.836803	-1.29406	-5.33729	-1.08257	-3.08238	-2.84085	-1.20899	-2.13967	-6.38153	-0.881425	-5.17009	-3.16245	-5.68807	-0.903823	-7.55582	-4.09094	-1.22322	-1.85798	-6.39663	-1.66695	-4.60707	-3.36079	-1.64461	-5.95286	-2.10972	-1.8747	-3.46617	-0.9673	-0.968253	-4.40529	0.159911	-0.443483	-0.165908	-0.81847	-4.98056	-0.642882	-1.01556	-0.620625	-1.39011	-3.13723	1.78187	2.13378	0.143377	other_trend	0.0253759	0.0410198
NMT1	-	-2.1496	-2.16371	-2.43915	-2.29673	-5.04109	-3.70376	-2.58504	-2.43122	-0.906245	-4.87825	-2.70306	-1.78311	-5.20832	-4.85944	-5.69271	-4.80507	-1.80639	-4.55215	-2.1601	-3.64218	-4.19684	-6.0794	-6.05487	-3.90445	-5.98268	-2.26309	-4.57794	-2.68311	-2.47126	-1.57699	-0.90479	-1.60878	-1.04893	-1.08701	-1.67872	-1.87756	-4.68211	-1.23086	-2.19418	-1.49056	-1.78035	-3.51993	1.0959	1.53076	0.138726	other_trend	0.00205585	0.00504642
GLIPR2	-	-5.92373	-0.273355	-1.56191	-4.71385	-5.10606	-5.35757	-6.14817	-4.1328	-0.848711	-0.640031	-4.89677	-0.797993	-3.45863	-5.03862	-1.07856	-0.453508	-5.34698	-0.443035	-0.395474	-5.55306	-0.11087	-6.02092	-5.77219	-4.10429	-0.564875	-4.394	-4.54457	-1.3776	-1.33187	-0.662685	-0.355431	0.452203	-0.392439	-0.445525	-0.844238	-0.498524	-1.33605	-0.592304	-1.02261	-0.62478	-0.56597	-3.03509	0.472969	2.26052	0.00206226	linear_increasing	0.00159135	0.0040511
CLEC3B	-	-4.27848	-1.02878	-1.61587	-1.77818	-4.47065	-5.05704	-1.11826	-1.3729	-1.56313	-5.57988	-5.12445	-3.84663	-1.47479	-5.79304	-1.17495	-1.28979	-0.698056	-0.739515	-3.7987	-4.36111	-6.13908	-2.36434	-6.18763	-5.4372	-3.16139	-5.09515	-1.89275	-4.70074	-1.5458	-2.48394	0.0954309	-1.06965	-0.387274	0.227961	0.847119	0.14606	-0.335904	-0.271073	-0.450545	0.482066	-0.0715805	-3.17241	0.544119	1.86738	0.0113966	linear_increasing	8.61242e-06	4.68925e-05
PURB	-	-3.71678	-3.79428	-3.23262	-3.82038	-4.27478	-4.04418	-3.69482	-3.24067	-2.8817	-2.8644	-2.87263	-3.22588	-4.09483	-5.18668	-3.8554	-3.54959	-2.97583	-3.7386	-4.63781	-3.92717	-4.69413	-5.94948	-3.38245	-4.23362	-4.77732	-2.85909	-4.52625	-4.48898	-3.99707	-2.73907	-2.74957	-2.94488	-3.08544	-2.83054	-2.99986	-2.4683	-3.34255	-3.11355	-2.89528	-2.75347	-2.91834	-3.84255	0.240318	0.766947	0.122168	other_trend	0.000639224	0.00188434
GSS	-	-0.831757	-5.8369	-0.0145765	-6.12781	-4.22241	-4.86318	-4.98434	-5.77156	-0.922816	-0.658719	-4.77165	-0.718425	-3.67083	-6.77984	-5.09497	-4.17886	-4.52031	-1.20785	0.282072	-0.825855	-1.03258	-4.85387	-1.51207	-5.82625	-0.720464	-1.09574	-5.94184	-3.80792	-1.08767	-1.32421	-0.348728	0.165099	-0.277873	-0.515547	-4.28598	-1.13688	-0.743285	-0.610203	-0.0473811	-0.933616	-0.87344	-3.09744	1.26156	2.27071	0.00868752	linear_increasing	0.00565966	0.0117726
PTPN11	-	-1.61608	-6.04737	-1.53994	-6.01581	-3.56169	-6.31438	-7.36907	-5.7919	-6.06153	-6.51973	-0.996376	-1.70529	-5.32452	-4.96224	-1.67381	-1.91248	-1.03172	-1.92022	-1.47805	-2.04639	-3.62917	-5.44079	-4.63131	-1.22204	-4.08739	-6.06371	-2.13873	-4.10351	-1.14431	-1.15826	-0.988832	-1.42966	-1.21061	-3.08651	-0.969654	-0.923453	-2.83816	-1.15377	-1.10726	-0.965577	-1.46735	-3.58359	0.804183	2.11601	0.000646778	linear_increasing	0.00396893	0.00876813
MPRIP	-	-3.42264	-4.37554	-1.56552	-5.63373	-3.00551	-3.36538	-4.0403	-1.97091	-2.0754	-1.80701	-3.64649	-2.94874	-3.48573	-4.90782	-4.16581	-3.89051	-1.44489	-1.52018	-2.62915	-2.0323	-3.00779	-5.48598	-4.07402	-2.45202	-3.35455	-2.44083	-4.53591	-4.5197	-4.71464	-1.49385	-1.72373	-1.8911	-1.00332	-1.50931	-1.50385	-1.24303	-1.85009	-1.77518	-1.72285	-0.554673	-1.47771	-3.26709	0.428495	1.22556	0.00943041	linear_increasing	6.38424e-05	0.000259968
ECI1	-	-1.5275	-1.74884	-1.24197	-2.20016	-2.72681	-1.95265	-5.09675	-4.27774	-1.31014	-1.84067	-4.24049	-1.66385	-4.63315	-4.24049	-5.71901	-6.44291	-6.73194	-2.5569	-1.35271	-4.86512	-2.05443	-4.86678	-2.87564	-4.03609	-1.29584	-3.77056	-5.85482	-4.7227	-3.53011	-1.2511	0.0936072	-0.233295	-0.593615	-0.146042	-0.669859	-0.958301	-1.26519	-0.0341986	-1.12802	0.106479	-0.482842	-3.35426	0.511881	1.71821	0.0496021	linear_increasing	7.84056e-06	4.33033e-05
KPNA4	-	-2.57646	-2.85782	-3.34565	-4.3162	-3.28635	-5.36399	-3.25326	-4.62925	-1.89082	-2.26234	-5.01654	-3.20849	-3.04956	-3.73208	-5.14885	-5.25359	-2.42802	-2.65132	-3.04165	-1.90581	-6.51226	-4.07817	-4.10432	-5.66446	-4.04471	-2.89996	-3.03373	-4.2843	-4.28345	-2.96163	-2.4144	-3.27496	-2.90502	-2.45018	-2.00809	-2.40148	-3.17568	-2.43031	-2.74999	-2.54843	-2.63585	-3.70283	0.389838	1.16864	0.218919	other_trend	0.00770694	0.0151615
AFDN	-	-3.06795	-2.78513	-1.41814	-4.6842	-2.85439	-6.20154	-5.28845	-3.49183	-2.31653	-4.8038	-3.97905	-2.11083	-3.43562	-4.92417	-3.01881	-6.3895	-1.78955	-4.8024	-3.3198	-2.116	-2.82481	-2.39723	-4.89538	-2.94571	-5.06179	-5.10426	-3.13765	-5.50734	-3.90412	-2.38426	-1.40356	-1.70045	-1.43766	-0.863564	-1.70148	-0.880365	-1.83055	-1.3106	-0.872837	-1.19384	-1.31949	-3.69867	0.363521	1.35334	0.00707793	linear_increasing	3.22753e-06	1.98824e-05
ACIN1	-	-1.85446	-2.21767	-1.81355	-3.80906	-2.23844	-1.99143	-3.46747	-2.33915	-1.28368	-1.84778	-3.73107	-1.48935	-2.50645	-6.70362	-3.03606	-2.50741	-1.35414	-2.2219	-1.72488	-4.82629	-2.92294	-5.02094	-5.8483	-3.01653	-5.00381	-3.41678	-2.38519	-3.97932	-4.80616	-1.89763	-1.76571	-1.60002	-1.57588	-1.68135	-1.81222	-1.79048	-2.48494	-1.38192	-1.44994	-1.56358	-1.7106	-3.04205	0.306988	1.41376	0.626146	other_trend	0.0056912	0.0118006
NOMO1	-	-3.00628	-2.28414	-2.78111	-4.06524	-2.55899	-5.34739	-5.37287	-4.45203	-2.01906	-4.87697	-5.30287	-1.724	-5.49427	-4.62457	-2.044	-4.5386	-2.26997	-2.52285	-2.06583	-2.91906	-2.65333	-3.2354	-7.02507	-4.73245	-4.35753	-2.94102	-3.18094	-5.0059	-4.61542	-1.7614	-2.58372	-1.12466	-1.13063	-1.3825	-1.77382	-1.55547	-1.59924	-1.5052	-2.91995	-0.917557	-1.64928	-3.65929	0.63998	1.39855	0.0135107	linear_increasing	9.40136e-05	0.000361006
ALDH6A1	-	-0.319755	-1.53333	-4.10679	-4.13064	-1.29986	-3.13744	-5.5546	-1.37483	-0.634825	-0.657553	-4.64558	-0.3554	-3.37345	-3.99732	-3.74543	-1.60336	-1.11331	-0.662062	-0.690757	-1.19772	-4.59121	-3.28525	-3.36117	-4.85571	-5.58575	-1.03403	-4.3448	-6.30973	-5.12834	-0.606417	-0.0157816	0.360176	0.317625	-0.0415058	-1.01491	-0.409127	-0.77387	0.17794	0.0498002	-0.319516	-0.166917	-2.77455	0.457834	1.89537	0.0851961	other_trend	0.000124066	0.000456809
RPA3	-	-1.3273	-1.78716	-1.1481	-1.81254	-2.10268	-2.39344	-4.07012	-4.53014	-1.52563	-4.61758	-4.88275	-1.11564	-2.6016	-4.97696	-3.27887	-4.72789	-1.27372	-4.15011	-1.50431	-4.38029	-4.16957	-3.87777	-5.40595	-2.99524	-1.90353	-2.12662	-4.56055	-5.18767	-4.85211	-1.4782	-1.49656	-1.4041	-1.49314	-1.08294	-1.91878	-1.43075	-1.98483	-0.929983	-1.4719	-0.918917	-1.41319	-3.1588	0.363079	1.47779	0.324746	other_trend	0.000744106	0.00213778
AKR1D1	-	-0.880521	-0.759324	-0.365905	-1.21586	-1.27505	-4.17728	-5.44605	-3.36728	-3.79692	-0.166579	-0.271165	-0.945081	-4.69442	-1.94087	-5.72824	-5.60554	-0.58041	-0.354222	-0.6956	-6.0335	-3.51604	-4.03713	-5.3198	-0.60645	-6.67066	-1.13771	-4.77492	-0.782781	-3.3883	-3.88597	-1.5027	-0.278643	-0.833558	-0.391447	-0.232036	-0.769567	-1.41118	-0.801349	-0.371168	-1.10875	-0.770039	-2.74732	0.459582	2.13767	0.425089	other_trend	0.00651542	0.0131402
DMD	-	-2.9773	-2.39541	-2.80184	-3.13352	-2.73898	-2.19997	-4.76433	-2.87762	-2.09144	-3.63573	-5.21608	-2.56986	-3.77666	-2.71661	-4.80082	-3.89528	-3.83702	-2.21805	-3.89575	-3.84932	-3.55322	-4.42893	-4.2875	-5.03383	-5.13242	-2.08469	-4.10766	-5.24647	-4.25762	-3.96605	-4.0067	-2.72529	-4.84865	-2.73029	-0.392452	-1.65406	-1.92972	-2.84039	-2.556	-1.87951	-2.55631	-3.61633	1.2403	1.00117	0.955653	other_trend	0.00950271	0.0182096
FBLN1	-	1.09846	1.9388	-3.47309	1.38413	0.494954	1.42309	0.905487	-6.75986	1.47837	0.800303	-4.15289	-5.55826	-4.85473	-3.4419	-3.09442	1.35971	0.426602	1.61314	0.96238	0.444362	1.28211	-4.18236	-6.66665	-3.78999	-3.49734	-3.25759	-4.28786	-5.42713	-4.63033	-4.7644	1.81257	-0.064543	-0.241283	1.36101	2.65401	1.46493	1.88749	0.862627	1.24353	0.0100985	1.09904	-1.87423	0.952433	2.97593	0.736116	other_trend	0.00380022	0.00847893
AZU1	-	-1.4679	0.587929	0.456346	-0.0633449	-0.107672	-4.57363	-4.29938	-2.07978	-0.726309	-1.18046	-3.68602	-0.356485	-3.77652	-3.87132	-4.44569	-4.66735	-0.054071	-6.36752	0.856853	-2.73802	-1.00673	-1.92295	-3.60924	-5.56251	-4.29594	-6.19063	-3.28836	-4.82476	-3.60118	1.25018	0.789697	1.33521	-1.63314	1.41577	0.798646	1.45452	1.04567	1.97289	0.814106	1.94187	0.993525	-2.52042	1.02089	2.23738	0.130023	other_trend	2.70112e-05	0.000123315
DAG1	-	-4.12408	-1.98039	-5.36913	-2.14162	-1.97211	-2.37012	-3.64649	-2.41826	-2.31998	-1.99946	-2.19523	-1.77056	-4.73483	-4.44386	-5.24723	-4.65018	-1.94809	-1.7812	-1.6394	-4.14228	-4.42197	-3.067	-6.28527	-2.38392	-4.43063	-4.48655	-3.38353	-2.47815	-1.87728	-4.66188	-1.41416	-1.81889	-1.24473	-1.0428	-1.40609	-1.14549	-2.20743	-1.6108	-1.68381	-2.67877	-1.6253	-3.27902	0.505171	1.34757	0.0596754	other_trend	0.000561867	0.0016821
EFTUD2	-	-0.832197	-0.960449	-0.87533	-5.862	-1.24618	-3.43135	-5.65747	-2.77195	-1.21026	-4.66996	-1.03458	-1.13692	-6.55951	-6.20342	-1.33117	-4.28368	-1.22936	-1.40719	-5.84757	-4.94801	-4.74996	-4.8255	-5.21552	-3.83754	-2.4596	-1.21428	-7.46868	-3.90537	-1.48175	-1.05253	-0.973109	-0.972493	-1.22096	-1.22868	-0.662536	-0.917856	-1.04076	-1.12181	-1.12599	-1.07918	-1.03434	-3.25698	0.166693	2.12212	0.156217	other_trend	0.00222603	0.00538168
PFKP	-	-1.18115	-1.84429	-4.70979	-1.34434	-1.64686	-6.13605	-4.96807	-3.40807	-1.30226	-2.06655	-3.39369	-1.37905	-4.40693	-4.14786	-3.10822	-4.5801	-1.3456	-1.66983	-1.21589	-5.23539	-2.67706	-3.674	-3.01314	-1.1357	-5.74519	-7.3345	-4.16005	-5.95423	-5.04139	-1.45328	-1.96199	-1.17283	-1.63427	-1.9928	-1.65832	-1.90573	-1.86825	-1.66531	-1.89149	-2.37469	-1.81257	-3.30928	0.311863	1.81149	0.479165	other_trend	0.0139274	0.0249241
PLEKHO2	-	-2.08744	-2.18962	-4.27199	-1.95025	-1.89091	-2.60462	-4.4165	-2.53897	-1.86345	-4.43512	-3.1386	-2.10139	-2.72447	-8.22845	-3.19479	-2.44474	-1.7849	-5.51491	-2.25539	-5.43407	-2.37209	-4.77317	-5.15034	-4.21392	-6.52075	-1.87354	-3.61345	-2.53567	-4.50855	-2.05991	-2.19947	-1.69328	-2.15162	-1.92514	-2.35008	-1.95053	-2.44899	-1.5715	-1.76785	-1.73778	-1.97962	-3.42307	0.29649	1.61581	0.371741	other_trend	0.00828065	0.0161858
HLA-DRB3	-	-0.209793	-6.26476	-3.07497	-6.0576	-1.93829	-4.16957	-5.07336	-4.3263	-1.63002	-2.70449	-2.31176	-2.02238	-6.05643	-3.31014	-4.62147	-2.41214	-2.31842	-4.97149	-1.91222	-1.88573	-5.70423	-3.27163	-6.41582	-3.27794	-4.81828	-2.58441	-5.1209	-5.47025	-5.08859	-2.03544	-1.93178	0.340171	-3.23774	-4.54112	-1.98003	-1.37445	-2.345	-1.68063	-2.08117	-1.65853	-2.04903	-3.70196	1.25531	1.68824	0.175258	other_trend	0.0072895	0.0144809
AIFM1	-	-0.754088	-2.15492	-1.85713	-2.30099	-1.15459	-2.24402	-5.12532	-5.119	-2.61439	-2.56043	-4.5202	-2.59116	-4.13086	-6.57727	-4.91081	-3.7535	-1.10293	-1.60274	-1.23417	-2.61284	-7.46387	-5.13669	-4.95629	-3.36486	-4.31356	-1.22824	-5.7158	-5.67878	-7.01318	-0.920183	-0.875807	0.00766819	-0.581938	-1.31294	-1.06378	-0.862945	-3.22295	-0.900464	-1.73047	-0.857332	-1.14009	-3.49043	0.858646	1.9613	0.285096	other_trend	0.000786133	0.00223844
CDV3	-	-1.74813	-1.43811	-4.11752	-1.41469	-1.39172	-3.28364	-2.03463	-2.29015	-6.65776	-2.52511	-5.04367	-1.3554	-3.67845	-4.67742	-3.54571	-2.36251	-1.98288	-5.73108	-1.26714	-1.90952	-1.98678	-4.2165	-4.02526	-4.7176	-3.8303	-4.78208	-4.34608	-3.5228	-1.98235	-1.80665	-1.74219	-2.1919	-1.51715	-1.81033	-1.35026	-1.26859	-2.3389	-1.52698	-1.34849	-0.995988	-1.60908	-3.12239	0.417991	1.47963	0.169533	other_trend	0.00303162	0.0069532
SRSF6	-	-1.16388	-2.06266	-0.279467	-1.71586	-0.266196	-4.34517	-4.31531	-0.386381	-2.99333	-0.53979	-5.73759	0.443876	-6.20909	-1.39721	-5.76385	-3.25717	-5.88302	-2.05253	-0.789608	-6.10326	-1.08526	-2.22442	-5.62286	-2.85943	-2.61681	-7.36748	-3.28178	-3.58327	-3.13232	-0.177768	-0.636408	-0.749487	-0.454107	-0.68559	-0.804408	-6.59266	-0.0830549	-0.642327	-0.144326	-0.667473	-1.14598	-2.8923	1.92949	2.19162	0.537952	other_trend	0.0308276	0.0484866
LAMTOR1	-	-1.35132	-1.27053	-1.48027	-4.67606	-6.26361	-3.33488	-5.88815	-4.31198	-1.35314	-2.50062	-1.43022	-1.1478	-5.98529	-5.89539	-4.58596	-1.54927	-1.53049	-2.26965	-0.812695	-1.3394	-4.26779	-1.57095	-5.84595	-5.16689	-1.65332	-5.37729	-4.6083	-1.64698	-1.7348	-0.793131	-0.986258	-0.211399	-0.671005	-1.15611	-1.21237	-0.939127	-1.4706	-0.935983	-0.862154	-0.958335	-0.940334	-3.05474	0.335691	1.92415	0.0141514	linear_increasing	0.00147314	0.00379033
	-	-5.63988	0.327396	0.554524	-0.744047	-4.95279	-4.63291	-0.869185	-3.74446	0.37855	-0.0667265	-4.48039	0.903545	-5.80886	-4.91251	-3.23727	-0.421042	1.42388	-0.156652	0.678326	-3.88447	-0.86028	-2.32539	-4.21737	-0.594667	-0.260727	-2.69448	-6.32364	-6.10533	-4.35009	0.272264	3.34888	3.52774	3.30139	3.14486	3.16762	4.25952	3.60529	3.43375	2.6337	3.19444	3.36172	-2.22482	0.414275	2.49206	0.000741008	linear_increasing	2.47719e-08	2.76811e-07
PRKAG1	-	-3.00006	-3.70076	-3.48881	-3.34742	-3.82097	-4.57657	-4.25539	-4.04164	-3.15651	-3.34428	-4.27963	-2.68402	-3.91918	-5.32854	-5.16227	-4.84762	-2.99982	-3.02242	-3.14402	-3.14338	-3.56492	-3.56003	-4.93071	-4.54634	-2.69209	-5.88306	-3.52088	-4.24526	-3.12539	-2.78859	-2.30725	-2.34729	-2.35332	-2.13826	-3.53074	-2.89305	-4.03871	-2.62978	-3.91693	-2.56413	-2.87195	-3.80402	0.702582	0.842756	0.0413956	linear_increasing	0.00322401	0.00733318
PPP2R2A	-	-2.02103	-5.26554	-2.08625	-7.40252	-3.69729	-2.80623	-4.90514	-4.30915	-2.08127	-2.47956	-4.03839	-2.21906	-3.35949	-5.16232	-4.40505	-3.52436	-1.53311	-3.31611	-1.22417	-6.26865	-3.46093	-3.27145	-3.85024	-1.71096	-2.42933	-2.92275	-3.28256	-4.01961	-8.04086	-5.61546	-1.9525	-1.7961	-2.56747	-3.0096	-1.56191	-2.04276	-2.00448	-1.54818	-2.16805	-1.94574	-2.05968	-3.69029	0.44455	1.66298	0.155571	other_trend	0.00426408	0.00932373
STT3B	-	-1.57222	-1.33643	-1.5596	-1.81753	-2.33008	-2.55553	-4.26034	-4.00398	-1.62009	-6.18203	-6.47252	-1.28735	-3.59606	-4.35571	-6.82751	-4.45378	-1.47469	-1.50611	-1.61114	-1.29283	-1.58233	-3.2338	-4.02307	-6.87237	-4.77945	-1.90052	-4.28914	-2.30269	-6.08338	-6.61972	-1.61812	-1.81286	-1.94485	-2.0541	-1.57344	-1.91777	-2.22818	-2.08647	-1.37175	-2.05071	-1.86583	-3.3934	0.269221	1.94314	0.825541	other_trend	0.0186818	0.0316914
PRTN3	-	0.626539	2.1325	1.68799	1.34147	1.08739	-5.61191	-5.29256	-4.54724	0.366155	1.00727	-5.88423	1.99286	-4.38282	-2.83512	-4.44057	1.77674	-0.0828154	-0.994074	1.54725	-5.80565	2.03491	-6.3919	-2.5588	-3.95751	-2.58494	-4.41632	-4.88208	-3.62149	0.421266	3.71559	3.76228	3.46529	-0.0883487	3.16689	1.81973	2.48076	2.57827	3.99944	2.91823	3.25272	2.73553	-1.6184	1.18198	3.12754	0.0431403	linear_increasing	0.000125534	0.000460451
ACTR1B	-	-1.5741	-4.98103	-1.57643	-1.62954	-1.74994	-4.6604	-5.84159	-5.42402	-4.59911	-1.59382	-1.9134	-1.74779	-2.6001	-3.50716	-1.35224	-2.79114	-1.76224	-1.49691	-1.8515	-5.92805	-1.20939	-5.75865	-4.11995	-2.87959	-1.93943	-5.89587	-6.7307	-5.62636	-1.28123	-1.58082	-0.89247	-1.40483	-1.08568	-0.237288	-1.33201	-1.0222	-1.80547	-0.930887	-1.16745	-0.969563	-1.08478	-3.18675	0.406322	1.844	0.0437493	linear_increasing	0.00105511	0.00286834
KRAS	-	-6.84292	-7.71053	-1.45085	-0.853391	-1.42129	-5.26457	-1.57988	-2.25016	-4.18061	-1.31216	-4.24197	-4.72347	-5.55299	-4.20112	-5.89813	-2.25647	-1.52851	-5.21211	-1.35025	-3.51418	-5.85269	-2.81914	-4.83621	-2.06197	-1.85775	-6.55124	-2.1795	-1.73474	-1.57985	-1.02164	-0.414054	-0.757328	-0.812535	-0.590768	-0.602337	-0.369934	-0.250462	0.175947	-0.533455	-0.351519	-0.450644	-3.39468	0.283802	2.03205	0.000173937	linear_increasing	5.72677e-05	0.000236707
CACYBP	-	-1.38642	-1.85214	-1.85484	-1.82793	-1.63343	-0.692603	-4.50671	-2.26158	-1.66077	-1.05262	-4.65053	-2.14229	-5.81998	-5.89944	-5.50888	-4.52624	-1.35938	-1.47648	-0.849724	-3.9957	-4.1943	-3.5872	-3.82745	-5.7946	-4.31478	-1.92924	-3.90587	-0.956417	-3.96689	-5.60118	-0.699879	-1.65094	-0.568573	-1.5511	-1.7071	-1.63304	-1.17813	-0.947715	-0.848519	-1.10088	-1.18859	-3.10119	0.423779	1.73007	0.499203	other_trend	0.0014522	0.00374145
PPP2CA	-	-0.179472	-0.257052	-0.229741	-0.205691	-0.182337	-5.79431	-5.1261	-5.9901	0.111105	-0.445125	0.734858	0.313262	0.146421	-5.10961	-6.7703	-3.76042	-0.0763515	-5.66379	0.614043	-4.29311	-5.01978	-0.574558	-3.39736	-3.31532	-3.22228	0.149297	-3.75678	-4.93814	-4.93214	0.296811	-0.146506	0.245583	-0.311511	-0.0468914	0.136651	-0.0235175	-0.0306023	0.390837	-0.0303477	0.309149	0.0492844	-2.36247	0.217596	2.54443	0.374113	other_trend	0.00516366	0.0109422
PSMC5	-	-0.844748	-1.80138	-1.5707	-1.76419	-1.22458	-3.37167	-4.32204	-2.34985	-1.05242	-6.8546	-0.221817	-1.47524	-5.77392	-2.79097	-6.33808	-6.30226	-1.38387	-1.41819	-1.01942	-1.2189	-5.97877	-1.75897	-5.82412	-3.57938	-5.14529	-1.30309	-2.98846	-4.39547	-4.29993	-1.51092	-0.776647	-1.29413	-0.730619	-0.687619	-1.45084	-1.65971	-0.64435	-0.927275	-1.51385	-0.984078	-1.06691	-2.99611	0.37952	2.01599	0.330933	other_trend	0.00495696	0.0106184
HDGF	-	-0.446992	-0.223874	0.224359	-0.591922	-0.0309978	-4.11841	0.0265893	-0.934863	-6.31895	0.292993	-5.84935	1.00547	-5.02383	-5.71671	-4.72887	-0.289372	0.510978	-0.656924	1.13889	-2.71974	-0.0655122	-3.38397	-4.43488	-5.48796	-6.54307	-4.58077	-4.53564	-3.92507	-6.16681	0.223857	0.413266	0.272063	-0.0654502	0.306907	0.439898	-0.0101171	0.169726	0.414608	0.362345	0.826357	0.31296	-2.44505	0.252173	2.64724	0.470171	other_trend	0.00234404	0.00561051
CPM	-	-3.50101	-4.68604	-5.61462	-6.73331	-2.46749	-6.50418	-4.89485	-5.11671	-3.32736	-2.54992	-3.15827	-5.14802	-5.55009	-5.06435	-3.34466	-3.26088	-2.37865	-4.35389	-2.01207	-2.69128	-2.93962	-2.23601	-3.73541	-2.71496	-2.28713	-2.53904	-3.61919	-2.53308	-5.19771	-2.77614	-2.40281	-2.07379	-2.88623	-2.32322	-3.64297	-2.1326	-2.09654	-2.33869	-2.78577	-1.99319	-2.46758	-3.76453	0.508777	1.35911	0.000110785	linear_increasing	0.00572837	0.0118514
TMED7-TICAM2	-	-0.306795	-5.16025	-1.18191	-1.49438	-0.567712	-7.24809	-4.39919	-2.74909	-0.939474	-0.898378	-0.91285	-0.714247	-6.19808	-5.81484	-0.575674	-5.48262	-0.0551298	-0.565754	-0.852929	-4.84897	-3.68982	-4.79504	-5.69509	-0.861099	-3.1576	-1.43415	-5.87446	-4.00832	-4.55102	-0.00918188	-0.584166	-0.0187536	-5.16735	-0.0204666	-0.29323	-0.755224	-0.130179	0.216519	-0.577071	-0.20928	-0.75392	-2.83474	1.57961	2.29212	0.209925	other_trend	0.0114696	0.0212375
ELOB	-	-0.814006	-4.94694	-1.53262	-0.90346	-1.49428	-2.23482	-5.55559	-5.1285	-2.49384	-3.62099	-3.23903	-6.16091	-1.76691	-5.96645	-4.6432	-5.81349	-0.820741	-2.82975	-0.985655	-1.21195	-3.98248	-5.74434	-3.8029	-1.10869	-1.97406	-2.57385	-5.13435	-4.67875	-4.33011	-3.24335	-2.16009	-0.340696	-0.239933	-4.79353	-0.941442	-2.58916	-1.54594	-0.737381	-2.2175	-0.919711	-1.64854	-3.2912	1.37144	1.79369	0.246855	other_trend	0.011921	0.0219045
CLTB	-	-1.6761	-1.38687	-1.31083	-3.92565	-1.47569	-4.80562	-1.88153	-1.48677	-6.26589	-4.52287	-4.70673	-1.39847	-2.6149	-2.17734	-5.09692	-1.86117	-1.36838	-4.97647	-1.05494	-4.11529	-3.62437	-1.77608	-3.12572	-3.86459	-2.67597	-5.06758	-4.34012	-2.20329	-6.06432	-1.56309	-1.25787	-1.43446	-1.38287	-1.28066	-1.82241	-1.60354	-5.0457	-1.42188	-1.56537	-1.08197	-1.78967	-3.08045	1.16225	1.60269	0.410653	other_trend	0.024581	0.0399702
PTGES3	-	1.26317	0.946057	0.460522	-0.119622	1.01918	-0.196107	-4.45702	-4.15123	0.360817	-0.427537	-2.99669	0.492552	-5.97019	-5.91181	-3.52865	-4.47174	0.412245	0.265347	0.0391608	-4.20897	-0.124797	-3.83847	-2.8041	-2.6559	-3.75842	-0.441748	-4.94911	-6.17942	-4.59604	0.0443447	1.67331	1.56227	1.33059	1.18163	1.49746	1.43858	0.488845	1.67223	1.74389	1.11384	1.37026	-2.01614	0.374186	2.47242	0.309622	other_trend	0.000122513	0.000451959
RTCA	-	-1.28032	-2.87069	-2.42375	-2.09072	-1.6172	-3.4206	-4.84332	-5.98388	-1.67246	-4.92264	-1.87496	-2.00473	-4.20049	-2.27878	-5.8662	-4.2	-1.9069	-2.34614	-1.78018	-4.80067	-1.61554	-4.41055	-5.57447	-3.49104	-1.57726	-1.71429	-4.78185	-4.79467	-2.62877	-1.6765	-1.67719	-1.62226	-2.30193	-2.29354	-2.1961	-2.12386	-2.50285	-1.26579	-2.01662	-2.4711	-2.04712	-3.15499	0.404138	1.51117	0.247063	other_trend	0.0287553	0.0457951
NAP1L1	-	0.464071	-2.59606	0.282046	-4.68894	0.769233	-5.44506	-4.22824	-4.28942	0.20633	0.637362	0.26918	0.391563	-3.75743	-5.14062	-2.45824	-0.778421	0.716246	-0.16109	0.650234	-4.67354	-0.23377	-2.96282	-3.4854	-0.734823	-0.593801	0.388144	-5.57496	-3.45952	-4.25248	-6.00891	0.269706	-0.0175899	0.11741	0.383645	-0.457141	0.155116	-0.171878	0.323066	-0.171034	0.146302	0.0577602	-2.02497	0.2621	2.36685	0.368692	other_trend	0.00899738	0.0173903
C1QB	-	0.954251	0.0251191	-0.0543816	-4.24694	-4.61465	-3.81613	-5.05769	-0.0704199	0.586628	-5.12666	-0.0359359	-6.17466	-4.24139	-4.32019	-5.46881	1.06214	0.200708	1.61244	0.343893	-3.46212	-4.05253	0.250146	-3.73548	-5.00295	-0.121858	1.73367	-0.391959	0.644206	-2.61755	0.30732	-0.20829	-0.0292695	0.454041	0.165686	2.64019	0.656679	0.96688	-0.549067	1.17182	0.231197	0.549987	-1.82973	0.901714	2.58076	0.0175444	linear_increasing	0.00725667	0.0144382
CBX3	-	-0.445308	-0.901355	-0.719199	-1.0788	-4.2509	-0.381426	-2.83791	-6.2175	-0.34698	-4.6711	-3.71103	-0.441063	-4.42113	-1.86258	-4.15291	-4.91664	-0.242631	-0.635991	-0.570089	-2.99305	-0.580041	-4.56244	-3.66899	-4.27475	-1.28533	-0.915803	-5.11519	-1.26304	-1.64943	-0.928246	-0.239298	-0.401774	-0.0666463	0.0718167	-0.295274	-0.661241	0.0505411	0.017093	-0.291099	0.149874	-0.166601	-2.33469	0.254995	1.86532	0.0358546	linear_increasing	0.000824315	0.00231628
DNPH1	-	-0.398165	-0.0745172	-0.0407404	-0.232363	-4.62653	-1.75388	-5.65411	-0.928275	-0.825741	-0.10011	-1.33214	-0.291883	-1.55173	-6.44353	-6.21652	-5.30735	-1.22115	-3.89383	-0.591806	-0.741634	-4.77568	-4.68974	-3.03247	-2.96885	-5.31184	-1.20563	-4.88234	-3.23755	-5.84983	-1.27565	-0.173936	-0.289972	-0.566203	-0.903098	-1.05656	-0.836624	-0.886694	-1.06017	-0.38314	-0.929156	-0.708556	-2.64852	0.327716	2.20175	0.819139	other_trend	0.00901182	0.0173903
TRA2B	-	-5.00852	-1.14988	-0.625354	-5.25254	-4.33733	-5.46804	-4.63667	-6.11162	-0.745894	-1.00599	-1.07158	-1.09467	-5.04026	-2.82403	-2.45493	-1.30841	0.22819	-6.68702	-0.347213	-2.8843	-1.31307	-6.11727	-3.70874	-0.798432	-1.87359	-4.17879	-2.12946	-0.932291	-1.25735	-0.655809	-0.59982	-0.664635	-1.26683	-0.736995	-0.288761	-0.299763	-1.21924	-0.821222	-0.581401	-0.29202	-0.677069	-2.69303	0.353212	2.07235	0.00182703	linear_increasing	0.00431453	0.00941262
ESAM	-	-4.92001	-5.5923	-4.954	-3.37114	-4.56939	-3.40269	-3.98572	-3.85085	-4.12127	-3.52845	-4.25847	-4.19004	-4.97224	-4.83077	-4.15766	-3.30108	-2.96318	-2.21808	-1.53671	-3.87344	-2.94269	-3.38571	-5.45926	-4.94848	-4.93824	-4.01611	-4.7386	-4.09397	-3.64549	-5.33911	-1.01221	-2.22713	-2.07934	-0.0851007	-1.61702	-1.60591	-2.26801	-0.173695	-5.79948	-0.121475	-1.69894	-4.07017	1.6822	0.945845	0.00044719	linear_increasing	2.12533e-06	1.36618e-05
SNRPF	-	-1.21977	-1.0701	-1.14118	-1.31433	-2.3515	-7.63771	-1.69421	-5.03634	-1.11996	-1.08734	-1.80352	-1.32468	-1.06549	-4.49952	-6.06696	-5.27878	-1.01572	-1.01448	-0.911021	-4.87165	-1.80199	-2.99139	-4.4792	-3.77271	-4.63058	-1.58938	-4.10431	-2.60304	-5.37191	-1.16225	-0.668685	-1.03324	-0.786186	-0.587606	-0.95666	-1.31545	-4.50328	-0.979279	-0.575428	-0.91869	-1.23245	-2.80103	1.17132	1.91906	0.455676	other_trend	0.0201238	0.0337504
INF2	-	-2.4062	-2.74754	-3.8863	-2.25727	-2.75438	-4.28889	-4.5333	-2.86266	-2.5766	-3.31323	-3.72349	-1.8868	-4.60205	-5.04616	-2.1619	-4.48322	-1.65052	-2.35003	-2.52117	-5.31965	-2.58052	-1.62031	-4.74576	-3.96227	-3.99672	-2.37175	-2.61917	-6.76937	-1.757	-2.46459	-1.30241	-1.44192	-1.29179	-0.840589	-2.28632	-1.43122	-1.94638	-0.944402	-1.24489	-1.0891	-1.3819	-3.27529	0.440456	1.26963	0.0132208	linear_increasing	4.7342e-05	0.000199542
RPS20	-	0.31779	-0.0869942	-0.114052	-0.854005	-1.09268	-3.93647	-4.36411	-3.82869	-2.50454	-0.726588	-0.234778	-0.0336344	-4.42542	-0.693151	-4.23316	-0.950142	-3.50091	0.319768	0.0568375	-5.22312	-0.96018	-2.61392	-3.52901	-1.48051	-4.87236	-0.262933	-5.54099	-5.09335	-2.35906	-0.121732	-0.0118497	-0.0758029	0.198411	-0.275364	0.815532	-0.4074	-0.0841818	-0.0977495	0.130238	0.145652	0.0337485	-2.09807	0.332595	1.97405	0.270641	other_trend	0.00173294	0.0043654
LCN2	-	-4.47191	0.451134	1.42446	0.265274	-0.677541	-4.27938	-6.62565	-0.203139	-0.396747	-0.264545	-4.49868	0.186308	-4.14655	-0.448061	-3.38178	-3.84262	-0.33935	-3.87205	-0.277195	-4.17068	-0.0133212	-2.69742	0.135663	0.0170283	-4.19338	-5.50093	-3.67868	-2.99572	-2.19029	1.71712	1.988	0.830715	-4.1442	1.38803	0.601732	0.804332	0.926547	1.53769	-0.379364	2.06171	0.561519	-1.96562	1.80175	2.28317	0.0838843	other_trend	0.00295682	0.00679785
CALM3	-	-4.61697	-4.21415	-4.73246	-4.39821	-1.16012	-3.52633	0.221413	-1.18444	-4.96629	-0.12116	-0.104935	-5.28643	-5.54358	-0.0436705	-2.43107	-3.16372	0.298955	-6.53112	-0.384499	-0.891259	-0.78468	-1.50055	-4.27901	-3.55513	-0.442794	-4.48388	-0.95206	-1.48144	0.328538	-0.619252	-3.83501	-0.106934	-0.899063	0.0561379	0.684492	0.409869	0.380628	-0.200357	-0.337667	-0.382059	-0.422997	-2.35168	1.28333	2.12394	0.00193914	linear_increasing	0.0103481	0.0195566
RPS27L	-	-1.30307	-2.36282	-1.25461	-2.09715	-1.51894	-2.14942	-4.25709	-2.40962	-1.24892	-1.16426	-4.1098	-0.968632	-5.39389	-4.27254	-6.5058	-2.00357	-2.89643	-1.49458	-1.21507	-3.9086	-2.15131	-3.81767	-5.32018	-6.29024	-4.6621	-6.27555	-3.1326	-2.96844	-3.1124	-1.37623	0.185199	0.408676	0.213666	-0.845004	0.217033	-0.260205	-0.291386	-0.175033	0.178986	-0.939353	-0.130742	-3.05472	0.463661	1.70574	0.0664613	other_trend	4.97185e-06	2.91338e-05
GLG1	-	-2.29298	-2.44923	-1.81276	-2.448	-2.41345	-2.69929	-3.64813	-2.58506	-1.83569	-2.17603	-5.04988	-2.21903	-5.29294	-5.9056	-3.3382	-2.82285	-2.01028	-1.80588	-2.39158	-2.64262	-4.78442	-4.9708	-5.67186	-5.3834	-6.98507	-2.71599	-3.13009	-4.44602	-3.11407	-2.0772	-1.81928	-2.19726	-2.05672	-2.32502	-2.09424	-2.09389	-2.35179	-2.25477	-2.30401	-2.02049	-2.15175	-3.37061	0.166451	1.46029	0.690612	other_trend	0.0128396	0.0233029
EIF3F	-	-0.918043	-1.11233	-0.763413	-1.32426	-1.44796	-4.63289	-4.14375	-4.11166	-1.30837	-4.16067	-5.976	-0.403786	-6.9878	-4.9138	-3.90156	-2.30822	-1.46764	-1.70694	0.102376	-0.620243	-4.7574	-6.82081	-4.73219	-5.07968	-0.203875	-1.28635	-4.51881	-3.95308	-1.52949	-1.62686	-0.218621	-1.17456	-2.49187	-0.954061	-0.745094	-0.424281	-1.52122	-0.50633	-0.89995	-0.8101	-0.974609	-2.88718	0.651515	2.08398	0.148048	other_trend	0.00731377	0.0145068
GIMAP4	-	0.147106	-5.15308	-4.11624	-4.99226	-1.30843	-3.24988	-5.1548	-3.42118	-4.67891	-7.10389	-5.64125	-1.65358	-4.86178	-2.15665	-1.31136	-1.42575	-0.426714	-1.32767	-0.484574	-5.24892	-1.28329	-4.74019	-1.26288	-1.3306	-1.26839	-6.09649	-1.77076	-3.59078	-2.1113	-0.878022	-0.921122	-1.36311	-0.375219	0.392773	-1.12298	-0.666581	-2.08462	-0.839248	-0.67762	-0.50422	-0.816195	-2.93008	0.650527	2.01402	0.000923399	linear_increasing	0.00249774	0.00591944
MAP2K2	-	-0.513317	-0.974646	-2.92443	-3.8784	-1.04792	-0.924907	-1.42576	-4.63111	-5.18662	-5.44212	-0.864993	-5.11934	-0.944582	-3.60273	-0.992444	-3.40651	-0.576435	-1.17776	-1.53485	-1.44582	-4.81327	-2.76494	-4.40566	-6.86968	-1.29211	-0.722596	-0.629423	-5.25317	-6.30305	-0.725653	-0.400517	-0.344442	-0.562064	0.00608093	-1.23216	-0.561531	-0.955253	0.118393	-0.822244	-0.599667	-0.53534	-2.67981	0.411617	2.0236	0.13148	other_trend	0.00210216	0.00513385
ME2	-	-0.524365	-1.19608	-1.33682	-1.21282	-1.51752	-2.00503	-4.34484	-4.01788	-2.53844	-2.36176	-1.73739	-1.19324	-5.01876	-4.43069	-2.92333	-1.68164	-1.50474	-3.19544	-0.977335	-4.80307	-3.95767	-4.80427	-4.59205	-3.0404	-1.61186	-1.09225	-7.09417	-4.26196	-4.85926	-2.2813	-1.18711	0.47561	-0.815347	-1.61355	-1.40196	-1.70406	-1.33902	-1.29453	-1.24091	-0.880658	-1.10015	-2.87055	0.619489	1.64461	0.606769	other_trend	0.00209222	0.00511608
AIMP2	-	-3.16774	-4.08333	-3.66376	-2.69918	-2.15799	-3.76969	-2.17437	-2.19199	-6.08556	-1.93421	-1.88306	-2.4183	-5.28332	-5.55668	-2.47987	-2.51732	-2.00059	-4.93928	-2.3816	-2.35189	-2.65389	-2.36393	-4.65168	-2.60227	-4.71366	-4.43776	-2.55744	-3.52643	-4.38513	-1.52508	-1.4387	-1.18983	-2.22238	-1.65117	-1.38681	-2.11129	-1.73326	-1.80812	-2.07095	-1.87715	-1.74896	-3.23857	0.33811	1.25535	0.0186359	linear_increasing	0.000723198	0.00208707
SEPTIN10	-	-0.896075	-6.69131	-0.578404	-2.89475	-0.694212	-2.7453	-3.36111	-4.94874	-0.67637	-3.61172	-0.861049	-3.71456	-1.26413	-4.95085	-1.27814	-6.46764	-6.06828	-0.0432393	-1.69703	-1.06958	-1.2653	-0.354403	-5.721	-3.73435	-1.79605	0.320458	-2.94896	-5.0535	-1.48583	-0.864493	-0.239716	-0.322448	-0.089868	0.294674	0.0762947	-0.196278	-0.117797	0.50725	-0.0611661	0.22295	0.00738959	-2.58053	0.263475	2.08199	0.00786728	linear_increasing	0.000394231	0.00124012
YES1	-	-3.4339	-2.51198	-2.54313	-2.31297	-2.03167	-5.82735	-4.99106	-3.60078	-2.1658	-2.55775	-5.53642	-3.52829	-4.02035	-4.38822	-2.50516	-2.34194	-1.958	-2.39213	-4.86863	-2.05841	-3.34422	-2.41497	-5.72074	-5.91482	-2.22077	-2.004	-5.6896	-2.54585	-2.29875	-4.01116	-1.47818	-1.18509	-1.65934	-1.20551	-1.36828	-0.785786	-4.21347	-1.26209	-1.35069	-1.08058	-1.5589	-3.39129	0.961609	1.36163	0.0206241	linear_increasing	0.000351676	0.00112279
RHOC	-	-2.22035	-4.95999	-2.16055	-2.25718	-1.8952	-3.09292	-4.08036	-1.8824	-1.81044	-2.14807	-2.75474	-2.30969	-4.49573	-6.65356	-3.30691	-2.66626	-2.18271	-2.02201	-5.63576	-7.55207	-5.53713	-2.02561	-4.9143	-3.35832	-2.8615	-1.68984	-4.97391	-4.12477	-3.08781	-2.4296	-1.7017	-2.4042	-1.45784	-1.44742	-1.89349	-1.75764	-2.00523	-1.92931	-1.52542	-1.65914	-1.77814	-3.36966	0.293625	1.56936	0.22266	other_trend	0.00307498	0.00703461
IDH3B	-	-2.34822	-2.93214	-2.15538	-2.82674	-2.28195	-2.60973	-4.79868	-4.95424	-2.29078	-4.70431	-3.17312	-2.09277	-4.7389	-4.40094	-5.59228	-6.44594	-3.26393	-2.48414	-2.31544	-2.78118	-2.59321	-4.63959	-6.15381	-4.76179	-3.00731	-2.10402	-3.90989	-2.76087	-4.9452	-2.67141	-1.90643	-1.59306	-1.84566	-2.65103	-2.35361	-4.00401	-2.80145	-2.06267	-2.46123	-2.25128	-2.39304	-3.55793	0.678266	1.30957	0.29611	other_trend	0.0108447	0.020355
MGLL	-	-2.72977	-5.28585	-1.79672	-1.72779	-1.20525	-3.28651	-3.5909	-2.19637	-1.79619	-1.27392	-4.00251	-2.23418	-4.68737	-3.96209	-1.82359	-4.36657	-2.66171	-1.62517	-4.76957	-0.68136	-2.24103	-3.50759	-2.68313	-1.52418	-2.4682	-1.58742	-4.63047	-5.98681	-3.95723	-0.898606	-0.673947	-0.402569	-1.34398	-0.853766	-1.9136	-0.995896	-1.21378	-0.969145	-1.14292	-0.26944	-0.977904	-2.8396	0.475341	1.41115	0.0241508	linear_increasing	0.000232856	0.000802061
ACAA1	-	-0.532851	-5.08859	-2.72965	-1.07767	-0.582485	-3.11246	-3.21718	-2.03711	-3.74536	-5.97582	-1.65051	-0.70075	-3.99359	-5.14566	-3.53492	-3.5286	-0.369984	-2.26843	-1.18164	-1.31123	-1.63865	-1.30008	-6.01891	-4.41648	-4.43591	-0.333577	-2.59273	-4.24762	-2.2443	-0.60052	-1.35169	1.52793	0.0683965	-0.0109378	-0.462164	-0.595437	-0.160886	-0.653382	-0.876877	-0.0236972	-0.253874	-2.65378	0.768284	1.7303	0.00741266	linear_increasing	0.000145862	0.000525978
	-	-1.55199	-1.12947	-0.931535	-1.47847	-0.803678	-1.16522	-4.65573	-5.48268	-1.29455	-1.36381	-3.09707	-1.00922	-5.14051	-2.68968	-3.93025	-6.77082	-1.46961	-1.60447	0.251653	-1.46987	-1.30623	-3.73193	-1.50836	-3.92763	-2.80497	-4.7349	-6.3561	-3.97694	-7.80198	-1.47864	-1.37665	-1.10499	-0.568997	-0.896489	-1.01232	-1.23299	-2.43333	-1.17892	-1.15165	-1.27503	-1.22314	-2.81382	0.482009	2.05022	0.907734	other_trend	0.0208197	0.0346454
COPE	-	-0.866033	-1.25494	-0.892273	-1.03139	-0.898375	-5.77592	-5.00152	-2.18619	-2.61719	-1.30704	-2.42603	-1.52165	-2.96213	-5.3036	-4.72404	-4.92633	-1.22419	-2.39264	-0.539959	-1.30473	-5.56604	-1.7701	-3.39795	-3.8027	-1.40219	-4.80117	-7.24456	-5.3219	-3.9723	-1.84245	-1.78423	-0.923511	-0.831015	-1.19916	-1.33278	-1.07516	-1.19726	-1.2533	-0.97386	-0.872401	-1.14427	-2.94258	0.282328	1.88429	0.615123	other_trend	0.00498411	0.0106557
RPL35A	-	-4.73515	-5.26078	-1.29808	-1.50399	-5.77776	-5.85384	-1.91641	-2.69745	-1.59604	-3.28301	-1.505	-1.84309	-3.65373	-1.99381	-1.43318	-1.93391	-1.14615	-0.990787	-0.923387	-3.33405	-6.57261	-5.28448	-4.77243	-1.71892	-1.95949	-2.66876	-2.24794	-1.80052	-1.76688	-5.51812	-1.14292	-1.79079	-1.18117	-1.3265	-1.7831	-2.04644	-1.44127	-1.86982	-1.11754	-2.27086	-1.59704	-2.89966	0.409487	1.72664	0.0288604	linear_increasing	0.0243706	0.0396952
ATP1B1	-	-4.95541	-6.82577	-0.175178	-4.69725	-5.81738	-0.941035	-2.2646	-1.05145	-0.668576	-0.316018	-0.362147	0.145553	-3.33304	-4.91039	-0.817963	-1.26112	-0.439638	0.161103	-1.3132	-0.00191291	-2.24947	-5.33543	-6.36873	-1.26156	0.0623552	-3.02631	-6.16255	-4.81593	-0.633201	0.0200299	0.204888	0.306585	0.309442	0.268996	-0.0802814	0.588948	-0.552914	-0.0929355	-0.132775	0.0198895	0.0839844	-2.32054	0.319589	2.34295	0.00497369	linear_increasing	0.00271342	0.00633682
CLIC5	-	-1.48939	-4.69649	-3.34798	-5.24889	-4.84911	-2.89861	0.59422	-3.46596	-4.76736	-0.888683	-3.6796	-6.70482	-5.42696	0.110139	-6.86248	-0.811733	0.285402	-0.939185	-0.601401	-6.02631	-0.982008	-0.0177167	-4.32432	-0.624628	0.0461346	-1.02839	-0.971993	-0.106879	-0.0316811	0.0059943	2.34464	1.1074	2.11197	2.11849	1.90496	2.27576	0.957169	1.92985	1.9847	2.36126	1.90962	-2.32502	0.490878	2.37869	2.81879e-07	linear_increasing	2.40045e-06	1.52266e-05
SLC44A2	-	-2.0316	-3.83263	-2.49049	-2.83996	-3.24839	-3.71998	-2.91262	-4.73888	-2.59551	-5.50722	-2.0549	-2.5852	-7.75499	-4.19668	-1.80231	-1.08825	-0.47565	-0.645975	-3.41708	-2.68197	-5.18365	-4.54509	-4.24344	-4.30791	-2.83453	-3.7464	-4.21561	-2.30516	-2.87379	-0.933145	1.93207	0.0385248	0.825006	0.931772	0.196263	2.21477	-0.439573	0.635722	0.817991	0.466789	0.761934	-3.19363	0.810069	1.55899	4.10767e-05	linear_increasing	3.40224e-09	5.23129e-08
SLC25A12	-	-2.09409	-2.28036	-1.40219	-2.90355	-2.30184	-3.37824	-5.45853	-2.37691	-1.98141	-2.2541	-4.0887	-1.88729	-4.16681	-3.56007	-2.11808	-2.28215	-2.20808	-2.21668	-2.17227	-2.35619	-2.96372	-5.40998	-3.37264	-4.74317	-1.08622	-2.28304	-6.70252	-3.87468	-4.9874	-2.21912	-1.86904	-1.91484	-2.26143	-2.20751	-1.59841	-1.72976	-2.28608	-1.81434	-1.87069	-1.96408	-1.95162	-3.03767	0.231185	1.34477	0.577144	other_trend	0.0160479	0.0279384
PDGFRB	-	-4.89738	-3.10674	-2.97028	-3.61703	-2.68933	-7.67007	-3.0807	-3.18001	-2.63295	-2.63241	-2.88031	-2.64108	-3.65822	-3.78659	-4.9002	-3.76643	-1.88328	-2.01006	-2.71074	-5.13443	-4.84045	-3.2992	-5.43895	-4.95246	-2.47248	-2.35675	-4.83238	-4.19885	-4.32366	-2.50791	-2.34789	-2.95211	-2.28588	-1.89924	-2.36004	-2.58529	-1.82138	-2.30607	-2.80529	-2.72722	-2.40904	-3.63571	0.368388	1.27391	0.0570475	other_trend	0.00500081	0.0106779
RBM39	-	-1.30295	-1.49648	-1.4141	-1.16359	-1.56168	-2.40409	-6.79762	-3.70828	-1.28047	-0.715713	-4.81212	-1.41011	-4.28599	-4.69861	-1.76482	-3.01017	-1.06132	-1.83945	-0.920022	-1.10879	-1.66334	-4.279	-4.6936	-2.4141	-5.299	-1.38107	-6.13087	-5.13156	-4.61594	-1.64091	-1.36338	-0.990319	-0.814041	-1.10446	-1.87167	-1.61403	-1.72635	-1.20206	-1.40096	-1.57811	-1.36654	-2.80019	0.339013	1.79638	0.58612	other_trend	0.0173404	0.0298106
TNPO1	-	-0.525361	-1.09907	-0.275483	-5.79165	-0.899947	-5.40314	-3.47996	-2.25124	-1.1031	-5.85442	-4.94241	-1.03874	-3.52113	-4.22115	-2.50504	-1.19874	-1.93279	-1.35832	-0.664853	-0.853809	-1.05961	-3.64847	-4.32268	-5.97588	-4.89931	-1.6973	-1.75281	-1.39937	-4.49533	-1.12665	-0.0669063	-0.117878	-0.351189	0.0277974	-1.13828	-0.542028	-0.649959	-0.221839	-0.335836	0.147494	-0.324862	-2.64326	0.377535	1.86234	0.030384	linear_increasing	0.000404931	0.00126962
VAMP3	-	-1.10986	-6.19019	-1.08399	-6.4647	-0.394451	-2.42106	-1.36531	-3.811	-0.181752	-0.599931	-0.547699	-0.656149	-4.06846	-4.10159	-4.47092	-4.16169	-0.0720583	-6.18642	-1.03535	-4.75472	-1.05819	-0.392251	-7.58308	-4.6309	-0.959594	-0.574409	-1.54649	-4.54528	-0.822309	-0.689674	0.470855	-0.0532	-0.1758	0.48295	0.170471	0.205727	-0.154767	-0.126458	0.366533	0.12254	0.130885	-2.54932	0.253435	2.26968	0.0142739	linear_increasing	0.000690436	0.00201368
DYSF	-	-1.51275	-5.4899	-2.29298	-1.19171	-1.39549	-5.03831	-6.00332	-2.06028	-1.90458	-2.92402	-5.08077	-5.12889	-6.29963	-3.98783	-3.12377	-2.94291	-2.24195	-2.58578	-2.68397	-2.2322	-1.52189	-2.14574	-2.83886	-4.71941	-1.95521	-1.87375	-5.39456	-4.7072	-6.08541	-2.00902	0.0587379	-1.32821	-1.91429	0.364933	-0.842973	0.155381	-1.329	-0.274153	-0.665523	-0.600212	-0.637531	-3.3124	0.736368	1.62606	0.00907516	linear_increasing	1.32658e-05	6.70971e-05
HDAC2	-	-1.92743	-2.43824	-4.90072	-3.9035	-1.96536	-2.71656	-2.75163	-2.44838	-2.10779	-1.87334	-3.04059	-2.45539	-6.62671	-4.44046	-2.8102	-1.4375	-3.43939	-5.88549	-2.27464	-2.35865	-3.40642	-4.93058	-2.96174	-2.9101	-2.79134	-2.70324	-2.46551	-6.06545	-3.84909	-2.40503	-1.64306	-1.58346	-2.29403	-2.13557	-1.66258	-1.7589	-1.79256	-1.98685	-1.88986	-1.32334	-1.80702	-3.20968	0.282553	1.31843	0.169239	other_trend	0.00204121	0.0050169
ILVBL	-	-2.04556	-2.27931	-3.13466	-2.65225	-2.0343	-2.63771	-4.56495	-1.84355	-2.43388	-3.93704	-6.30379	-1.91716	-4.67	-3.26797	-4.46691	-5.10279	-3.09282	-2.32299	-2.40378	-4.5222	-1.79105	-2.30285	-5.84505	-4.55389	-2.09357	-2.21494	-2.69196	-4.05359	-5.14493	-2.77772	-1.9107	-1.65951	-1.7184	-1.81413	-1.99281	-2.27241	-2.72585	-1.79171	-1.89794	-2.06654	-1.985	-3.30344	0.315322	1.3034	0.227709	other_trend	0.00324066	0.00735367
RUVBL2	-	-1.7548	-0.969306	-0.311804	-1.49904	-0.843161	-1.35922	-2.01996	-5.13409	-1.96907	-1.21193	-6.90474	-1.48341	-5.85309	-4.47979	-1.71509	-2.97356	-0.972844	-0.928728	-1.75132	-1.6805	-3.195	-3.06604	-4.17658	-2.23755	-5.25599	-5.11292	-4.23386	-1.81492	-4.32459	-1.33277	-0.911989	-1.46216	-1.21114	-1.40012	-0.843433	-1.63842	-1.23998	-1.07684	-1.2147	-1.12579	-1.21246	-2.68552	0.24316	1.75732	0.555595	other_trend	0.0125669	0.022851
DYNC1LI1	+	-3.84147	-3.11918	-3.28475	-3.13416	-5.41688	-2.55174	-3.75703	-2.9582	-2.40601	-2.72615	-3.01462	-2.10569	-6.40717	-4.32214	-4.25404	-4.28035	-2.08537	-3.70481	-2.34145	-2.0399	-2.82057	-4.39492	-3.52238	-4.436	-2.23347	-3.57401	-2.27329	-4.1204	-5.41971	-2.55349	-2.19311	-1.9978	-2.07917	-1.96771	-3.75264	-2.43492	-2.81159	-2.07859	-2.80241	-2.3652	-2.44831	-3.43665	0.551538	1.10285	0.0884889	other_trend	0.0101329	0.0191876
NCF2	-	-2.96756	-3.27145	-2.84407	-3.09858	-4.89876	-3.08598	-4.78766	-3.48952	-2.73589	-2.73075	-4.35952	-2.09397	-2.42113	-4.36246	-2.82765	-3.96342	-4.03791	-4.50542	-0.588749	-3.17799	-2.68231	-6.23085	-4.7518	-2.89601	-3.33742	-3.55159	-2.94748	-3.76327	-5.61857	-2.15156	-3.74807	-0.374631	-2.27466	-2.61502	-2.15396	-3.51645	-3.40973	-1.64757	-2.33573	-2.87277	-2.49486	-3.47264	1.00065	1.14175	0.182695	other_trend	0.0207774	0.0346049
RPS29	-	-1.49453	0.057287	-3.82182	-1.54519	-4.22996	-4.96801	-1.81581	-4.02736	-0.0789338	0.527129	-1.99292	-0.13949	-4.6515	-3.00581	-2.08679	-6.08049	-1.44603	-1.281	0.0878332	-1.73103	-1.13023	-4.81801	-2.82339	-2.51088	-4.36502	-6.68224	-0.966147	-1.91394	-2.03208	-0.338334	0.594959	-0.18665	0.637875	-0.0847824	-1.21605	0.0292954	0.368844	0.455308	-0.799665	0.206364	0.000549965	-2.37682	0.606256	1.91334	0.0235399	linear_increasing	0.000458052	0.0014154
PSMB4	-	-0.616622	-0.987374	-0.853957	-0.527871	-4.25747	-1.15669	-5.66416	-0.810649	-0.532653	-0.685152	-4.90806	-0.81197	-1.2568	-5.93812	-3.37344	-5.08159	-0.0978901	-1.91138	-0.581059	-0.857894	-0.87634	-5.63283	-3.36148	-6.17283	-2.9946	-0.878624	-0.576454	-4.87814	-2.96299	-0.506908	-0.0943609	-0.296812	-0.563414	-0.0608511	-0.245497	0.120832	-0.125409	-0.246387	-0.19267	-0.302778	-0.200735	-2.32507	0.181137	2.04665	0.176686	other_trend	0.00241958	0.00576262
COPS3	-	-1.41198	-1.39401	-1.95422	-1.7454	-4.01854	-1.43362	-3.10038	-4.63222	-1.5497	-3.89972	-5.50539	-1.2497	-4.36518	-5.79412	-1.00593	-1.2362	-1.4794	-3.19232	-1.70923	-1.02456	-1.26366	-5.64053	-4.77119	-1.28693	-3.5001	-6.31972	-4.34495	-1.01425	-1.61907	-1.1444	-0.805645	-1.37314	-0.970369	-1.35704	-1.07399	-1.17149	-1.38101	-0.65852	-1.36296	-1.13261	-1.12868	-2.75355	0.255118	1.73675	0.0633784	other_trend	0.00580888	0.0119408
UBE2M	-	-2.05769	-1.80123	-1.7662	-2.20337	-3.69612	-6.2299	-4.00854	-4.48128	-3.34464	-2.22334	-2.06557	-1.64103	-6.34692	-5.17699	-2.05876	-4.05357	-3.44658	-1.38396	-1.54099	-6.04745	-2.33193	-2.41164	-4.12533	-2.16633	-2.07848	-1.7042	-5.39486	-1.66586	-2.33928	-1.68375	-1.47031	-1.55199	-1.45697	-1.3837	-0.869541	-1.10296	-1.46433	-1.61635	-1.1711	-1.31462	-1.34019	-3.04919	0.229985	1.54373	0.0105883	linear_increasing	0.00135428	0.00352699
SRPX	-	-0.472142	0.473047	-0.674883	-0.527591	-2.07959	-0.2163	-4.39299	-2.82475	-0.386183	-4.7064	-5.84748	0.5227	0.397353	-5.44229	-4.20262	-0.667202	0.248738	1.7771	0.104077	-4.4913	-3.0002	-4.9906	-0.973239	-2.36547	-0.106915	0.0976728	-0.0207998	-0.651105	-2.01516	-0.742931	0.276006	-1.36255	2.60085	-0.452656	1.9537	-0.113537	0.411465	-0.473934	0.734215	0.347778	0.392134	-1.60591	1.16658	2.10926	0.0503375	other_trend	0.00724685	0.0144336
ACOT2	-	-0.821762	-2.84465	-2.05268	-4.39882	-3.00467	-2.53823	-4.47647	-5.49703	-0.896905	-2.69645	-3.82391	-4.70488	-1.9412	-2.23677	-4.3958	-3.71218	-0.695302	-1.18197	-1.53501	-1.78677	-3.2616	-3.07515	-4.21626	-3.30226	-3.47563	-1.11607	-4.6064	-2.74032	-2.64476	-0.854974	-2.76625	1.79407	-0.395592	-1.7275	-0.0361768	-1.5354	-1.85728	-0.67433	-1.12043	-2.70293	-1.10218	-2.81783	1.36169	1.34608	0.00686494	linear_increasing	0.00127187	0.00334409
NPNT	-	-5.74951	-2.24664	-3.10648	-3.01199	-2.72429	-4.75576	-3.10307	-4.16661	-2.30867	-3.78256	-0.42772	-4.73463	-3.88932	-4.33051	-4.17038	-4.34844	0.169019	-1.63589	-1.04968	-4.40591	-4.18283	-3.12359	-3.7593	-4.08544	-2.72961	-1.30517	-1.79142	-0.133713	-4.52539	0.604061	2.95916	0.376328	2.94062	3.34453	2.4953	2.85937	1.35519	2.35522	2.12501	3.87694	2.46877	-2.96038	1.00641	1.63873	1.93982e-07	linear_increasing	5.53649e-12	2.0865e-10
CXCL12	-	-3.9247	1.06459	-0.631645	0.0463649	-0.625134	-0.181572	-5.43737	-0.338108	0.987667	-5.11916	-2.8708	0.231143	0.0336973	-3.98267	-5.86544	-3.62231	1.21586	0.662478	-1.70523	0.425687	-2.2771	-0.213058	1.06968	-4.58847	-6.42101	-0.5426	-0.286171	-4.2118	-3.62453	-0.317266	1.77275	-0.912654	3.12899	2.03466	2.0037	1.67908	0.979141	0.424228	1.93644	0.854319	1.39007	-1.70163	1.10733	2.37846	0.051937	other_trend	0.000332862	0.00107342
COL21A1	-	-1.13287	-0.034293	-0.215194	-0.631763	-0.943338	-1.40785	-5.0852	-6.31974	0.378803	-0.722114	-0.165192	0.252071	-0.659764	-3.86607	-5.05165	-4.5197	0.404008	-0.371954	-3.89373	-0.836346	-3.43824	-5.45149	-6.36772	-0.599343	0.119811	-3.52518	-3.73999	-0.643345	-6.30079	-0.420757	1.29969	-1.36143	1.36287	0.538898	0.46384	1.42073	-0.205624	1.05063	0.273912	1.06188	0.590539	-2.17296	0.868297	2.32053	0.183438	other_trend	0.000774812	0.00221276
PTPA	-	-2.14415	-4.65749	-3.50643	-1.65714	-2.19936	-1.97298	-1.45764	-5.73873	-2.62683	-4.73723	-1.9565	-1.67388	-4.73409	-5.23854	-2.12305	-4.58606	-1.60286	-1.35145	-1.74845	-1.68912	-2.22779	-4.14047	-2.68043	-1.71837	-1.61665	-4.35497	-2.39161	-1.84846	-5.75769	-3.78952	-1.35854	-0.995001	-0.888977	-1.2653	-1.28732	-1.38674	-2.0813	-1.40503	-1.02851	-1.385	-1.30817	-2.93093	0.32931	1.43298	0.0313003	linear_increasing	0.00113436	0.00304929
MYADM	-	-0.446049	-3.12262	-1.07429	-0.704426	-1.03363	-1.20212	-3.71337	-1.38827	-0.771459	-0.287976	1.14647	-0.54136	-3.88502	-4.23468	-0.322102	-7.5095	-0.426714	-0.79613	-1.51446	-2.76657	-5.22256	-0.752287	-4.02889	-5.76986	0.339428	-0.614359	-3.48849	-3.25441	-3.90948	-0.777041	-0.345951	-0.753448	-1.04515	-0.131303	0.0465701	-0.341559	-0.162765	-0.458372	-0.569738	-0.110817	-0.387253	-2.06907	0.331596	2.03821	0.515642	other_trend	0.0140007	0.025032
JUP	-	-1.20181	-4.46209	-1.05335	-6.1035	-1.36184	-5.53483	-0.695534	-0.824132	-0.231588	-1.54776	-4.35971	-1.28373	-5.38801	-3.39424	-0.994351	-4.76293	-5.56617	-0.852258	-1.29353	-0.869716	-1.61294	-0.826978	-5.68452	-1.20953	-0.845377	-0.736237	-4.76059	-4.69287	-5.41015	-0.683679	0.206372	-0.860356	-1.52035	0.131622	-0.243143	-0.162464	-2.2854	-0.0737759	-0.261053	-0.462725	-0.553127	-2.60813	0.792209	2.06371	0.0651264	other_trend	0.0041268	0.00908558
CTSZ	-	0.13257	0.381197	0.49269	0.764468	-0.205591	-4.28743	-5.22556	0.0260397	0.53155	0.875677	-5.75392	0.363504	-5.18778	-5.69974	-3.06502	-2.98321	0.338462	-0.106983	1.46889	0.450409	0.500784	-2.96041	-4.08248	-6.81391	-2.30411	0.428964	-2.64172	-2.87197	-4.64991	0.293605	0.482009	2.87081	0.662881	0.0204173	0.58243	-0.313732	0.683463	0.858676	0.947036	0.473886	0.726788	-1.72636	0.842948	2.53472	0.281929	other_trend	0.00496115	0.0106184
EIF3D	-	-0.643242	-1.21681	-0.852637	-1.87661	-1.4431	-5.83323	-4.71751	-1.67247	-1.1196	-1.33173	-4.41436	-1.00815	-3.63672	-3.54983	-5.32191	-1.34511	-0.75934	-0.80035	-0.697327	-1.29916	-1.68299	-6.05264	-3.85623	-2.90102	-1.0165	-1.85553	-4.84566	-2.85618	-4.33006	-1.483	-0.827782	-0.792912	-0.485118	-0.4443	-0.791151	-1.23967	-1.48288	-0.356248	-0.747342	-0.66196	-0.782936	-2.48063	0.349927	1.71599	0.195341	other_trend	0.00381889	0.00849525
GNB2	-	1.23203	0.498391	0.90142	0.396248	0.709995	-0.76205	-5.44205	0.42356	0.957852	0.54002	-3.50018	1.00386	-5.38764	-3.43069	-5.99343	-3.74901	1.58675	0.949721	0.00910872	-2.926	0.231193	-0.776927	-0.118332	-2.70271	-3.42602	1.01058	-4.25016	-4.43663	-5.96285	1.02975	2.62061	2.85441	2.09295	2.71012	2.12449	2.49341	2.44606	2.64665	2.43426	2.79093	2.52139	-1.37947	0.258166	2.55186	0.118576	other_trend	2.59658e-05	0.000119967
GSPT1	-	-3.87294	-2.42745	-6.43214	-1.3731	-1.16856	-1.36664	-5.01777	-5.04184	-0.8861	-1.69989	-1.15259	-3.0908	-1.118	-4.67597	-4.97376	-0.851467	-1.33971	-6.07795	-1.23297	-4.65984	-1.48276	-1.37301	-6.61032	-1.5676	-1.39327	-7.36529	-1.56522	-1.38332	-1.35947	-0.894505	-1.09562	-0.87363	0.0341572	-1.03294	-1.03368	-1.34979	-1.33788	-1.01071	-0.777732	-1.11835	-0.959619	-2.78181	0.391656	2.0709	0.0160406	linear_increasing	0.00923145	0.0177833
ATP5ME	-	-1.40345	-1.10779	-1.02877	-1.51685	-0.727978	-4.32429	-1.74584	-3.98276	-1.19308	-1.39131	-1.19482	-4.75604	-1.31731	-3.46053	-3.33459	-5.24038	-0.776993	-3.82547	-0.99473	-1.42662	-3.77651	-4.37757	-1.43769	-1.6388	-1.22686	-1.51054	-6.77067	-2.70821	-1.11815	0.198346	-0.666717	-0.355042	-1.12726	-0.309554	-0.355249	0.296727	-0.495526	-0.768455	-0.352172	-0.527885	-0.466113	-2.30388	0.3678	1.65938	0.0624728	other_trend	0.00140434	0.00364258
PSAP	-	1.43588	1.06295	0.804445	0.711817	1.90236	-4.78072	-4.61064	-4.38261	1.04309	-0.541509	-0.0101255	1.00859	-0.192309	-4.53546	-4.27315	-4.99223	1.81605	1.50035	1.88307	-6.41864	-3.1147	-5.01644	-1.69329	-5.13393	-5.0311	-0.660832	-4.97225	-1.33752	-0.719031	0.224935	2.62655	5.65375	2.08328	2.73261	3.35472	2.2572	2.62629	2.99758	2.25967	3.17804	2.97697	-1.6341	1.02662	2.78281	0.0495362	linear_increasing	1.00787e-05	5.30718e-05
OTUB1	-	-0.381971	-0.32573	-0.93054	-2.76746	-0.315879	-4.54747	-0.764821	-1.74714	-0.582465	-1.23724	-5.32909	-0.681503	-4.60678	-5.50408	-0.869535	-3.05371	-1.39384	-4.99752	-0.275781	-6.63585	-5.18215	-1.11976	-5.94111	-6.39041	-6.95901	-1.27703	-0.429268	-0.338176	-0.944086	-0.316352	-0.730294	-0.268786	-0.403958	-0.431369	-0.571819	-0.873523	-0.437904	-0.379739	-0.476123	-0.558376	-0.513189	-2.52819	0.178158	2.35176	0.29123	other_trend	0.0107273	0.0201543
EIF2S3	-	0.128551	-4.0175	-0.944629	-0.297819	-0.192557	-5.92719	-7.33783	-5.55646	-0.366114	-1.6872	-1.50839	-0.73077	-1.47741	-5.92318	-3.28819	-1.19273	-0.57382	-0.334947	-0.804958	-6.17821	-4.25274	-3.48077	-5.96115	-1.3802	-1.00775	-0.628599	-4.88002	-2.61112	-1.69303	-0.284505	-0.168952	-0.129743	-0.405547	0.234507	-0.301737	-0.462554	-1.17877	0.17794	-0.15681	-0.627834	-0.30195	-2.47971	0.40798	2.27232	0.0450759	linear_increasing	0.00487962	0.0104906
H2AZ2	-	1.45735	-0.129207	0.881282	-0.122843	1.26436	-4.96879	-0.530091	-1.49714	-0.543824	0.881675	-6.5531	0.286796	-4.5244	-6.70928	-0.461855	-0.386193	1.29909	1.72268	1.6263	-4.12688	-3.72634	-5.08526	-3.39682	-5.17044	0.0103804	1.8619	-4.13309	-5.31573	-0.272805	-0.00823198	0.793787	0.720096	1.05894	0.866064	1.20023	1.23491	1.04083	0.810874	1.33659	0.449241	0.951157	-1.54568	0.27239	2.76208	0.308245	other_trend	0.00740457	0.0146566
PSMD8	-	-1.55352	-2.0838	-1.92012	-2.09381	-1.56933	-4.97583	-3.21625	-2.77414	-1.89555	-1.86115	-3.65374	-1.90205	-2.02209	-1.81515	-5.70199	-5.12271	-2.53078	-6.5119	-1.78821	-2.16425	-6.25557	-5.13963	-5.58453	-1.63659	-2.07635	-1.46867	-4.95979	-4.08249	-5.37495	-1.79642	-1.72019	-1.64354	-2.10038	-2.28328	-2.03591	-2.00425	-1.63498	-1.9487	-2.43153	-2.01443	-1.98172	-3.18438	0.261607	1.68154	0.790009	other_trend	0.0314629	0.0493646
PRCP	-	-2.0546	-4.14498	-3.53823	-2.11248	-1.71405	-2.62791	-3.45644	-3.17922	-2.30992	-2.32688	-2.47273	-2.25063	-3.58486	-4.53199	-5.52203	-6.72116	-2.34387	-2.47527	-2.23919	-2.54099	-2.84205	-2.19035	-5.93032	-5.60331	-4.91743	-2.461	-7.52002	-2.51609	-3.77679	-2.12695	-2.17803	-2.48842	-2.41438	-2.16381	-2.54462	-1.7052	-2.58883	-1.83235	-2.40353	-1.48711	-2.18063	-3.40106	0.383952	1.53906	0.547476	other_trend	0.0184562	0.0314236
GLO1	-	-1.1004	-5.81565	-0.737609	-2.2749	0.282985	-1.97735	-0.127371	-5.38769	-3.78392	-0.872278	-4.286	-1.288	-1.8026	0.44573	-4.82668	-5.26252	-0.869992	-0.672887	-1.24941	-1.47678	-1.10478	-1.65968	-4.7627	-3.61606	-1.30418	-1.76333	-5.34779	-5.51711	-4.97719	-0.49688	-0.758765	-0.479142	-0.314563	-0.552315	-0.721231	-0.507323	0.0733288	-0.670361	-0.271372	-0.694097	-0.489584	-2.45443	0.258221	2.00136	0.148817	other_trend	0.00394201	0.00872875
DPP7	-	-1.94459	-1.88745	-2.20397	-0.983755	-6.3714	-1.86982	-5.36572	-2.95389	-1.50061	-1.80132	-1.8717	-2.69829	-1.40529	-3.37671	-2.57008	-5.52265	-1.4121	-3.42331	0.556389	-1.12347	-0.690861	-2.78233	-5.27595	-4.46146	-6.22028	-5.25229	-6.54498	-4.47365	-5.12774	-1.24425	-1.71596	1.73087	-1.92547	-1.99196	-0.833692	-3.16564	-1.45133	-1.36002	-1.64324	-1.63913	-1.39956	-3.06012	1.25111	1.93715	0.460505	other_trend	0.0157254	0.0275516
PSMF1	-	-5.15304	-1.94367	-1.87395	-0.737475	-5.49983	-4.96807	-1.85813	-1.89693	-1.77535	-1.49006	-3.40359	-1.30112	-4.68787	-1.75522	-2.31882	-5.19381	-1.80775	-3.31108	-1.58907	-1.89362	-4.23466	-2.63395	-1.15398	-6.07806	-5.50977	-4.6338	-1.88902	-2.07716	-2.24133	-2.19786	-1.51764	-1.61153	-1.29459	-1.87596	-1.41178	-1.40655	-2.05397	-1.57367	-3.22696	-0.995031	-1.69677	-2.9036	0.612401	1.58172	0.123282	other_trend	0.0247455	0.0402035
AGER	-	-4.68188	-6.01576	-4.69393	-6.08659	-5.74412	-6.8799	0.406467	-3.77699	-5.1023	-3.76285	-1.00523	-0.72314	-4.16409	-0.90827	0.390081	2.69172	2.7207	0.829991	0.0953604	1.01485	0.438831	1.39975	-4.16463	0.188283	0.374305	-0.148448	1.46726	1.21115	1.34308	1.98704	4.6332	3.69031	4.93101	5.37026	4.17061	5.20429	3.98892	4.65919	4.24883	4.99613	4.58927	-1.37664	0.55147	2.99757	5.34659e-14	linear_increasing	2.96396e-07	2.57771e-06
TES	-	-1.57232	-1.97986	-4.89999	-2.0637	-2.25633	-1.95446	-2.07689	-2.78808	-2.14645	-2.1907	-3.5792	-2.29017	-2.76267	-4.55147	-5.81956	-4.38871	-1.26322	-2.09097	-2.37163	-2.50741	-2.62899	-3.50716	-5.82382	-2.24329	-2.21415	-2.02645	-4.85391	-3.86278	-3.4462	-1.69664	0.239287	-0.758161	0.196119	0.304868	2.10473	0.202185	-1.5081	0.352017	1.17529	0.173937	0.248218	-2.92857	0.967699	1.25378	0.00221267	linear_increasing	9.77836e-09	1.26134e-07
ITGAM	-	-2.96406	-1.37828	-0.703907	-1.53039	-2.05437	-3.3324	-3.79874	-4.7043	-5.32712	-1.57669	-2.28732	-1.08082	-2.95175	-3.93377	-4.98966	-3.02244	-1.88117	-2.72345	-0.862589	-3.85881	-1.50069	-1.84895	-2.4591	-5.00122	-1.50723	-2.11952	-4.39098	-1.06996	-1.56476	0.00876023	0.0665347	0.574648	-2.85531	-1.00171	-1.35062	-1.00631	-0.901256	0.837132	-1.92419	0.286075	-0.7275	-2.54719	1.17059	1.42884	0.00599752	linear_increasing	0.000827134	0.00232081
NDRG1	-	0.640685	-1.0049	0.0175779	-0.752529	-0.698229	-4.75573	-4.10542	-1.19031	-0.0435633	-0.0601415	-1.07456	0.245069	-5.5682	-6.01827	-3.56024	-1.33922	0.374428	-0.176063	-0.492551	-5.13592	-0.484246	-0.862264	-3.88706	-3.83625	-0.777583	-0.384908	-6.5598	-6.41754	-5.38552	-0.034209	1.24622	0.782538	1.86323	2.625	0.689229	1.65307	0.975103	1.94251	1.10461	2.15446	1.5036	-2.11092	0.642334	2.37927	0.125042	other_trend	3.27595e-05	0.000144378
PDCD6	-	-0.381069	-1.10522	-0.838668	-5.07834	-1.19806	-5.43458	-5.25416	-0.724039	-4.43747	-1.00688	-0.952466	-0.418227	-3.34594	-3.21076	-0.9454	-0.554165	-0.235945	-2.39952	-0.569261	-7.62623	-0.797624	-0.172996	-6.73281	-3.25481	-1.30707	-1.39674	-4.13555	-3.21976	-1.28548	-0.294056	-0.159233	-0.0925091	-0.0351612	-0.22875	-0.108884	-0.0864764	-0.300387	-0.206296	-0.176527	-0.100688	-0.149491	-2.27711	0.0798777	2.11441	0.0404447	linear_increasing	0.0031445	0.00716994
OLFML3	-	-0.815832	-0.150096	-1.23262	-0.127291	-0.844852	-6.55805	-3.35221	-1.55309	-0.0426009	-1.1338	-0.945375	0.178698	-2.21181	-3.70736	-3.48676	-3.94466	-0.57728	-2.128	-2.97368	-0.935512	-6.54419	-2.6915	-1.19206	-4.598	-4.98036	-0.920043	-1.4236	-5.67932	-4.69677	-1.23101	0.435209	-1.89096	1.42954	1.5481	-0.471375	0.343706	-0.451234	0.910948	0.479243	0.216462	0.254964	-2.34997	1.01136	1.97581	0.299082	other_trend	0.000304435	0.00100364
UFM1	-	-1.03209	-0.550509	0.100641	-0.76741	-0.80541	-1.132	-5.11351	-4.05602	-0.452272	-0.192281	-0.974645	-0.381942	-1.22711	-5.38778	-5.1959	-3.08986	-0.619294	-0.694366	-0.218902	-0.762194	-0.0915859	-5.59621	-5.6216	-5.2803	-6.07677	-3.92099	-0.803326	-1.11778	-4.31246	-0.52831	0.0547668	-0.316234	0.108905	-0.327974	-0.737701	-0.262827	-0.816113	-0.0645077	-0.484778	-0.286378	-0.313284	-2.19674	0.305772	2.16173	0.545249	other_trend	0.00971797	0.018493
LONP1	-	-2.08717	-4.33265	-0.730407	-2.0433	-1.55025	-2.44141	-6.02372	-2.34847	-0.0515133	-2.17632	-5.86077	-0.571198	-3.96878	-4.90769	-4.43102	-1.80929	-1.60451	-2.33904	-1.16231	-1.49419	-1.99599	-2.68599	-6.39876	-5.74116	-3.55239	-1.48572	-5.91375	-2.2597	-5.59957	-1.03846	-0.181544	0.20538	-0.799052	-0.835974	-1.64951	-0.811811	-2.04569	-0.94406	-1.23094	-1.40652	-0.969972	-2.95352	0.662785	1.88032	0.126496	other_trend	0.00245242	0.00583361
UPF1	-	-1.50291	-0.936483	-1.72697	-2.35858	-1.77948	-3.45458	-2.38729	-4.46087	-2.0978	-2.1595	-5.38081	-1.45664	-2.37558	-5.48754	-5.37561	-5.76725	-1.50839	-1.92702	-5.29404	-1.1291	-1.99024	-2.48035	-2.34923	-1.89779	-2.04956	-1.9502	-5.03825	-5.05291	-2.02912	-2.11431	-1.33483	-1.75983	-1.76988	-1.68204	-0.807097	-1.32017	-1.56128	-1.58359	-1.52774	-0.99539	-1.43419	-2.85061	0.322499	1.53898	0.238901	other_trend	0.00674423	0.0135448
CD9	-	0.269971	0.0886635	0.907635	0.700449	1.13416	-2.87217	-4.07501	-6.10749	0.59531	0.983464	0.53709	0.77547	-0.435903	-2.67357	0.699991	-3.45052	0.895457	1.34466	0.930561	0.477961	-3.28523	1.46761	-3.96929	-3.12145	0.929231	0.908575	-5.06487	-6.40984	-3.57813	0.475657	1.91889	2.36013	2.02158	2.19286	2.29087	2.32933	1.82343	2.25506	1.72365	2.18009	2.10959	-1.03072	0.224087	2.48109	0.123471	other_trend	0.000315283	0.00103057
DAZAP1	-	-1.42572	-1.39564	-1.04903	-1.62308	-1.61726	-1.79655	-2.54094	-4.40146	-4.50341	-1.56799	-4.91085	-1.1244	-4.90333	-2.28043	-4.89971	-1.79283	-5.33767	-4.6399	-1.65478	-1.72764	-2.58907	-1.87758	-1.63979	-4.52348	-2.45452	-4.64649	-2.69677	-1.94964	-5.35861	-6.6177	-1.09512	-1.49542	-1.64276	-1.30148	-1.22496	-1.55243	-1.43586	-1.13529	-0.867327	-1.11978	-1.28704	-2.98488	0.242807	1.62954	0.677883	other_trend	0.00238555	0.00569569
MTPN	-	0.877656	-0.469641	1.1982	0.572406	0.464483	-0.239798	-6.17147	-0.855036	0.282843	-6.5356	-3.99893	0.967883	-5.37417	-5.049	-5.88944	-6.4195	1.18128	0.0830185	0.698267	-0.731042	0.259694	-5.58808	-0.446511	-5.49937	-0.627002	-5.0691	-0.924896	-2.64512	-0.706006	0.9549	0.857147	1.16863	0.54691	0.597605	0.552592	0.279974	-0.026948	1.16679	0.710922	0.993631	0.684725	-1.85664	0.381041	2.80355	0.187092	other_trend	0.00732838	0.0145208
DDB1	-	-0.405152	-6.14589	-0.816632	-1.43476	-0.551489	-2.3612	-4.7213	-3.71748	-0.168909	-3.925	-1.37949	-1.17386	-3.55994	-1.07307	-1.08686	-5.0145	-0.935318	-0.396959	-1.33981	-0.947723	-4.7993	-1.18808	-5.05055	-4.78033	-1.04694	-0.453864	-2.84126	-1.11563	-3.18531	-0.67419	-0.364595	-0.996857	-0.669823	-0.350455	-0.485124	-0.719052	-0.994637	-0.686206	-0.804618	-0.50201	-0.657338	-2.20969	0.233141	1.78871	0.0451123	linear_increasing	0.00995088	0.0188615
ALCAM	-	-3.95941	-0.799994	0.47328	-2.94397	0.120357	0.32553	-2.4067	-1.69028	-0.122173	-0.747431	-2.55819	-0.529151	-3.77932	-4.78421	-3.86294	-2.22321	-1.0644	-0.630785	-0.988472	-1.66968	-2.06891	-5.70561	-5.09392	-4.0915	-1.93725	-2.23502	-4.37561	-5.08893	-4.01553	-1.67625	-0.0443997	1.16754	0.41172	1.01523	0.560001	0.458058	0.0534026	0.707011	-0.0386011	2.15849	0.644845	-2.33766	0.674437	1.7813	0.156142	other_trend	8.67787e-06	4.69827e-05
DYNLL1	-	0.0234366	-4.49615	0.6282	0.0279593	0.513829	-0.307995	-5.47278	-7.41184	-2.63046	-0.0902235	-0.938828	-0.0756747	-1.32122	-4.72562	-5.25317	-4.27892	-0.0300459	-4.30353	-1.29727	-0.64748	-0.128788	0.263531	-3.10562	-0.459385	-0.55209	-0.594457	-4.49029	-5.70423	-1.44809	-0.339594	1.22118	-0.136945	0.218535	0.419862	-0.0290316	0.878251	-2.98056	1.04014	-0.18573	0.0558091	0.0501512	-1.95489	1.17777	2.31295	0.117749	other_trend	0.0127429	0.0231492
PDCD5	-	-1.29723	-0.469972	-1.07199	-1.34397	-0.68382	-5.12738	-5.04973	-0.961519	-1.3942	-1.06503	-2.11755	-1.27307	-6.30288	-4.62304	-3.30263	-3.95753	-1.57392	-1.31156	-1.05621	-1.1286	-2.9555	-1.28508	-4.26663	-4.90131	-1.56449	-1.14741	-3.528	-3.91461	-1.59763	-1.64642	-1.19885	-1.41913	-1.38406	-1.56301	-1.01724	-0.967637	-1.51117	-0.957123	-1.18224	-0.949971	-1.21504	-2.3973	0.239779	1.64505	0.464386	other_trend	0.0306273	0.0482901
CD2AP	-	-1.87923	-1.56153	-1.47036	-2.05391	-1.29231	-2.76149	-4.37597	-2.26393	-1.68219	-1.71642	-5.13948	-1.54528	-4.89258	-3.53319	-3.80426	-4.77051	-1.59867	-1.98248	-1.6867	-4.41656	-2.26181	-2.48708	-3.26423	-1.95191	-3.01072	-2.30769	-4.76717	-4.7731	-3.02029	-1.75232	-1.78995	-1.93267	-1.70156	-1.3691	-2.22832	-1.82104	-1.90215	-1.36104	-1.7527	-1.44368	-1.73022	-2.80078	0.274996	1.25277	0.533849	other_trend	0.011404	0.0211888
CRIP1	-	2.55705	0.725288	2.10297	-3.3248	3.09433	0.278157	-5.10856	1.52926	2.50173	1.95266	0.389297	2.54959	-4.25558	-4.19754	-5.1607	-0.344092	2.13793	2.80257	1.8093	-3.92325	-3.14165	-3.24141	0.490466	-4.07141	0.648066	1.36248	-0.0199921	-3.28828	-5.05523	1.31219	2.37112	1.19213	2.73588	2.66578	1.9034	0.213602	2.64171	3.00654	3.15089	2.06887	2.19499	-0.562972	0.903678	2.87064	0.477481	other_trend	0.00518401	0.0109512
ACTA2	-	-4.96945	1.66854	4.80042	1.98325	-5.23104	1.4639	-4.52986	2.08601	4.37524	4.03818	4.38013	4.01124	-3.96787	2.61005	4.13691	3.95288	5.19375	2.29277	4.2274	-5.95495	-5.54227	-5.76602	-3.90677	4.90917	4.38116	-3.98036	4.17372	-5.08457	3.56732	4.41597	4.3668	3.80178	2.27383	4.20052	5.27712	4.35992	4.18549	4.35756	4.24174	3.50482	4.05696	0.791162	0.773716	4.21616	0.074829	other_trend	0.0206221	0.0345258
PPP1CA	-	-0.346091	-0.72158	-0.543845	-2.82188	-4.01638	-1.3782	-5.10873	-5.087	-1.05049	-0.518265	-1.23665	-0.922812	-4.14371	-1.82255	-1.24155	-1.17773	-5.39179	-5.61865	-1.12662	-0.935424	-1.02132	-1.1942	-4.57781	-1.46994	-1.13077	-4.73319	-3.62868	-1.5175	-1.45105	-0.047375	-0.646994	-0.91317	-0.761376	-0.861163	-0.803849	-0.695783	-0.563298	-0.594809	-0.639822	-0.478177	-0.695844	-2.19939	0.137921	1.76744	0.0966692	other_trend	0.0112573	0.0209656
MYDGF	-	-2.09724	-2.85921	-1.86402	-1.98953	-3.23527	-4.73	-2.46498	-2.34682	-2.20607	-1.7718	-3.02108	-2.35372	-5.65704	-6.43328	-5.83613	-3.75246	-1.17246	-4.13048	-0.218016	-1.51933	-2.11959	-3.9993	-5.49084	-2.36204	-2.55571	-2.64605	-3.02875	-2.71136	-1.99967	-1.1764	-0.920452	-0.238773	-0.901409	-1.25997	-0.0259616	-0.398254	-0.330404	-1.08373	-0.770297	-0.599485	-0.652874	-2.92496	0.399656	1.49043	0.00337166	linear_increasing	3.10757e-05	0.000137305
LBP	-	-2.14601	-2.0235	-1.97353	-4.9327	-3.04405	-5.66193	-5.83428	-1.62706	-1.38968	-2.68482	-1.50826	-1.55668	-2.95823	-4.3485	-1.82697	-1.75297	-3.06957	-2.08989	-1.93804	-5.23432	-4.1175	-5.10329	-2.03437	-5.78048	-1.98929	-4.26797	-1.76263	-1.57205	-1.87025	-0.708837	-0.350984	-1.97018	1.5505	0.382264	-1.4521	-1.76922	-0.240311	-1.55061	-1.54094	-1.27827	-0.821985	-2.89359	1.13077	1.54144	0.00357563	linear_increasing	0.000379455	0.00119716
THBD	-	-2.67789	-3.05188	-4.63115	-6.55141	-3.03467	-4.11257	-2.42911	-5.81988	-2.84855	-2.24318	-3.21299	-5.16102	-3.83048	-2.92127	-3.82566	-6.55386	-0.486639	-1.97596	-1.0807	-1.61078	-2.80927	-1.50283	-3.76632	-2.19654	-1.85634	-1.86751	-2.28239	-4.42261	-1.91863	-2.13469	0.665106	-1.90202	0.408797	0.0355501	-2.30368	-0.870277	-1.81068	-0.329776	-1.52274	0.690327	-0.69394	-3.09389	1.13822	1.5255	2.22243e-05	linear_increasing	5.28788e-05	0.000220941
AP1G1	-	-2.26929	-1.59991	-0.687346	-1.98643	-2.37874	-2.39413	-4.92069	-2.48888	-1.58166	-2.48486	-5.16948	-1.03994	-4.65376	-5.3617	-3.35099	-3.76495	-1.23908	-1.58548	-1.07437	-1.56713	-2.2076	-4.36203	-2.62807	-0.868708	-5.62478	-1.01275	-6.64634	-5.45049	-2.12032	-0.392871	0.130028	-0.264441	-1.28774	-0.155372	-0.646898	-0.643306	-1.14224	-0.38453	-0.338619	-0.561382	-0.52945	-2.76376	0.43215	1.73684	0.0438753	linear_increasing	0.000286951	0.000954186
SULT1A4	-	-2.98325	-3.78219	-2.47371	-2.15598	-1.95319	-4.20219	-1.85153	-6.87932	-1.48134	-0.877153	-2.01339	-1.70289	-2.13821	-4.24631	-1.56211	-6.00033	-1.36133	-1.7332	-1.73315	-4.16438	-1.32367	-1.24159	-5.36956	-1.14611	-0.806823	-1.40985	-4.3647	-1.57667	-1.11049	-4.36279	0.0164861	0.470525	0.479301	0.336592	-0.909431	-0.449414	-0.742723	-0.0826645	0.346382	0.86351	0.0328563	-2.60025	0.578027	1.6338	0.000761698	linear_increasing	1.51845e-05	7.48321e-05
CLIC3	-	-4.91247	-5.1508	-2.0126	-3.09241	-1.49904	-3.52349	-6.14035	-1.97265	-0.91161	-1.0707	-0.677152	-1.44185	-5.53421	-4.88149	-1.53372	-0.636112	-0.977075	-5.07278	-0.357712	-0.929796	-1.3116	-0.367732	-6.73461	-1.49233	-0.829169	-0.943318	-4.55423	-0.574809	-0.756504	-0.0238793	1.46633	-0.0326799	2.25767	1.29751	-0.369419	0.184655	-1.13718	0.488608	-0.214164	-0.125132	0.381621	-2.33054	1.01322	2.0313	3.09611e-05	linear_increasing	0.000256123	0.000865146
PCK2	-	-2.07958	-5.06085	-1.91611	-0.431288	-1.23307	-0.7615	-5.18132	-0.817336	-0.648541	-0.652669	-2.43043	-2.33022	-4.82902	-2.20517	-3.60399	0.0163412	-0.476202	-0.637998	0.0799304	-0.834373	-2.25001	-6.37167	-6.51389	-1.73093	-2.6575	-0.395631	-1.55617	-1.73934	-7.33467	0.662362	-0.43058	2.09185	1.16736	0.0439603	-0.491417	-1.03377	-0.395616	-0.28062	-0.385334	-1.08426	-0.0798434	-2.19736	0.984979	2.12731	0.055986	other_trend	0.00448252	0.00971297
SNRNP70	-	-3.68254	-2.86668	-2.05022	-3.10376	-2.92704	-2.59746	-3.08912	-3.21811	-2.94888	-3.28924	-3.46638	-2.51604	-3.28482	-5.60144	-2.97642	-3.62292	-2.35443	-5.46169	-2.25548	-4.28384	-3.39668	-2.59432	-1.88569	-3.06414	-3.92087	-2.59378	-4.86513	-4.17727	-6.66386	-2.8451	-2.46961	-2.38759	-1.70704	-2.36257	-2.53326	-1.8127	-3.1893	-2.85585	-2.37405	-2.47076	-2.41627	-3.38678	0.432447	1.09038	0.589531	other_trend	0.00967796	0.0184351
SARG	-	-4.46535	-2.15098	-2.19012	-3.47948	-1.07158	-2.2222	-3.65019	-0.422138	-0.760806	-0.816589	-2.29549	-1.07769	-2.3686	-6.328	-2.60743	-1.16525	-0.349634	-5.27431	0.154524	-0.700399	-0.592676	-1.47112	-4.24618	-1.74655	-1.53463	-0.714518	-3.33577	-4.09031	-4.31314	-0.158085	1.6947	0.937744	1.54566	0.591601	0.557478	0.298026	-2.24623	0.894106	1.24627	0.602109	0.612146	-2.18149	1.10068	1.67312	0.00198305	linear_increasing	1.73222e-05	8.3862e-05
FUS	-	-0.555992	-4.59004	-0.225099	-1.651	-1.26572	-4.59692	-0.818301	-3.62376	-0.719417	-0.589522	-0.820782	-0.0529616	-2.63951	-5.19179	-3.16259	-1.16848	-0.158866	-5.64114	-0.843972	-1.6245	-1.38628	-3.22668	-3.71914	-0.61519	-1.21633	-1.32787	-0.887441	-1.14553	-5.34384	-0.921772	-0.580985	-0.867627	-0.337552	-0.407045	-0.54511	-0.711093	-0.630593	-0.497346	-0.770494	-0.0955532	-0.54434	-1.99101	0.225457	1.7129	0.134975	other_trend	0.0119433	0.0219246
SUN1	-	-3.45953	-3.04955	-2.48642	-3.61427	-3.14934	-2.98198	-3.89771	-3.08963	-2.80202	-2.4584	-3.26305	-3.20135	-3.04864	-4.93936	-5.38919	-2.89503	-2.4794	-2.68595	-5.70027	-4.25433	-5.13553	-2.77454	-7.28011	-3.73887	-3.09387	-2.46918	-4.31917	-6.25637	-3.14435	-3.20822	-2.88336	-3.099	-2.80633	-2.55286	-2.36585	-2.42384	-2.78365	-2.5832	-2.68226	-2.22686	-2.64072	-3.67552	0.263182	1.22244	0.618015	other_trend	0.0121148	0.0221548
MFAP2	-	-1.27373	-1.32573	-0.819667	-1.11157	-1.08656	-1.45006	-1.50379	-5.49369	-0.844759	-1.38038	-5.46495	-0.445169	-4.63696	-3.86601	-1.37465	-2.98749	-0.21095	-1.33834	-2.05046	-0.607341	-2.46219	-4.37469	-2.14884	-3.35125	-3.85835	-0.664903	-3.00921	-1.94885	-3.93191	-0.86497	0.0339391	0.328104	1.71257	0.459522	1.16079	0.786754	-0.380455	0.119976	0.609242	0.224131	0.505457	-2.19625	0.600458	1.53242	0.0139264	linear_increasing	3.78652e-06	2.28141e-05
MGP	-	-0.0330496	-0.593249	-1.31589	-1.25252	-0.834912	-3.86412	-2.35283	-1.9152	0.383107	-4.25511	0.434892	-0.618977	-3.90168	-2.44554	-6.89903	-1.17439	0.609114	1.46902	-1.48984	-5.99007	-5.081	-0.879689	-3.51394	-1.85784	-0.726844	-1.9456	-4.16921	-2.24043	-3.40757	-0.550878	-0.506001	-0.536879	0.713721	-0.296444	2.2793	0.617133	0.0812863	0.120522	1.01846	-0.138271	0.335283	-2.01378	0.860941	2.01273	0.148106	other_trend	0.00101895	0.00279775
ABCD3	-	-4.66196	-4.84563	-1.11168	-5.59564	-1.89369	-1.98274	-3.25023	-1.98934	-1.90419	-4.66605	-1.4061	-0.825052	-5.03155	-3.21677	-0.830065	-1.8465	-1.52353	-2.144	-1.54014	-1.95769	-4.11569	-2.18651	-3.07817	-2.33709	-3.66095	-2.08998	-1.85742	-2.16376	-2.52043	-1.00407	-1.40348	-0.582283	-1.23206	-1.54794	-1.38202	-1.2291	-2.12524	-1.04395	-1.86585	-1.2061	-1.3618	-2.57455	0.427013	1.33663	0.00111444	linear_increasing	0.00798152	0.0156536
GNAI3	-	-2.30771	-4.22376	-5.82049	-2.34789	-2.3356	-5.48237	-2.35673	-5.06683	-1.82195	-3.41695	-2.4429	-1.74019	-5.88188	-5.98009	-2.28572	-2.03318	-2.3208	-2.39495	-1.69475	-2.36851	-4.25045	-2.14636	-2.1351	-2.41469	-4.09203	-2.34082	-2.83301	-2.4594	-2.63253	-2.18311	-1.18094	-1.79028	-1.354	-1.79124	-1.87214	-2.17961	-1.94375	-1.71127	-1.75036	-1.91518	-1.74888	-3.06036	0.288629	1.34792	0.00107703	linear_increasing	0.00439874	0.00957461
STING1	-	-2.38707	-2.09476	-2.15178	-1.64639	-2.03001	-5.03733	-2.72999	-2.49065	-1.63448	-2.27042	-2.03412	-1.01971	-5.6749	-2.88791	-2.76106	-2.11629	-1.76428	-2.9113	-1.80397	-4.16133	-1.89653	-1.88538	-4.82629	-6.32586	-5.38375	-4.12858	-2.19845	-5.42729	-6.42007	-0.957284	-1.45141	-0.646105	-1.03563	-0.730207	-1.11241	-1.3894	-1.26303	-0.710256	-2.05848	-0.459836	-1.08568	-3.03524	0.478334	1.60732	0.358314	other_trend	0.000586343	0.00174181
PLXDC2	-	-2.9267	-2.21865	-3.81206	-1.95791	-2.39195	-2.54362	-2.16241	-4.65441	-2.67304	-7.05551	-4.34831	-2.81596	-4.96373	-2.45894	-4.97577	-3.09974	-2.24589	-2.40222	-1.98262	-2.74694	-4.30176	-2.56628	-3.68049	-2.46386	-2.50542	-2.18157	-2.77471	-2.61085	-2.49288	-2.36195	-1.47723	-2.61314	-1.94419	-1.8552	-1.27997	-1.30332	-3.81853	-2.34759	-1.96562	-1.23756	-1.98423	-3.07921	0.794773	1.16111	0.0133167	linear_increasing	0.008795	0.0170575
FABP4	-	1.45155	-5.8705	-7.59202	-4.49546	0.0777689	-6.78556	-4.87234	-5.54201	-0.129908	-4.25563	1.26041	-0.369773	-0.333578	-0.128904	0.614669	0.343836	1.21087	1.2292	-0.264883	0.155694	-6.29419	-4.05828	-6.87217	-0.065293	0.828995	0.580276	-0.713103	0.480649	1.75545	0.52472	0.735265	0.938458	1.21305	1.31151	0.701656	0.82494	1.21296	1.1704	1.5569	0.774232	1.04394	-1.60432	0.289089	3.04955	0.000170922	linear_increasing	0.00982441	0.0186586
SPR	-	-0.78314	-3.81782	-1.56115	-1.50937	-1.38199	-0.94361	-3.1583	-1.78864	-1.66545	-1.52618	-2.01448	-1.45249	-2.19474	-5.29079	-1.38758	-5.08015	-2.00964	-1.68129	-1.0633	-1.77305	-0.539943	-6.23557	-4.04244	-2.40279	-1.55133	-1.35812	-4.31133	-5.31146	-4.95515	-1.34285	-0.55926	-0.490475	-0.269241	-1.05423	-0.668534	-0.91808	-1.99821	-0.868286	-0.632973	-0.799208	-0.825849	-2.47114	0.470568	1.60099	0.395298	other_trend	0.00293426	0.00676217
ASPH	-	-0.945768	-1.67403	-1.16391	-1.46701	-1.37529	-2.69283	-3.52941	-4.75624	-1.25717	-1.1164	-1.44028	-1.3407	-2.8095	-5.40835	-1.63016	-1.97961	-0.938897	-1.18115	-1.3246	-0.876382	-1.4328	-1.93154	-3.2208	-5.71788	-1.65141	-1.07964	-6.40865	-5.37561	-5.12067	-0.958405	-1.06938	-0.966599	-1.03014	-1.08995	-1.17978	-1.25921	-1.28469	-1.00024	-1.27305	-0.956938	-1.111	-2.3935	0.128537	1.70829	0.774857	other_trend	0.023986	0.0392456
AP3D1	-	-2.13672	-2.2763	-2.08061	-2.30583	-1.94634	-3.76669	-4.05563	-3.96056	-1.6798	-2.88302	-2.10857	-1.95927	-3.53594	-3.48502	-4.25661	-2.25308	-1.97728	-1.97743	-1.72456	-1.89394	-1.77748	-2.30842	-4.55952	-2.04265	-2.5777	-1.76228	-4.24828	-7.23356	-3.58927	-1.69182	-1.51068	-1.86169	-1.43947	-1.7245	-2.00115	-1.37655	-2.40318	-1.47624	-1.92221	-1.74967	-1.74653	-2.80181	0.316313	1.24513	0.335113	other_trend	0.01224	0.0223412
HDLBP	-	-0.311204	-0.913359	-0.452276	-0.555789	-0.751075	-1.33341	-5.00916	-4.42401	-0.551131	-0.856324	-2.1683	-0.447985	-4.6898	-6.57482	-1.12529	-7.00462	-0.321192	-0.509985	0.669097	-1.06437	-1.56462	-5.86419	-4.94904	-1.44424	-1.6555	-0.903507	-2.19922	-4.89004	-5.56753	-1.05025	-0.509272	-0.757883	-0.262509	-1.22236	-0.439912	-1.42485	0.186447	-1.05376	-0.520341	-0.758673	-0.676312	-2.28277	0.475872	2.22352	0.668241	other_trend	0.0303901	0.0480344
RPL17	-	1.17375	1.27521	1.04663	0.521229	0.81324	0.00813997	-3.6056	-0.0460209	0.841217	0.246274	-0.413445	0.995225	-3.27714	-6.8754	-3.76569	-0.509716	0.895336	0.320926	0.982251	1.18016	0.641362	-3.36821	-3.22496	-5.71148	-5.70581	0.481207	-4.17429	-4.26729	0.432133	0.493576	0.896951	1.01316	0.853395	0.74645	0.880677	1.0918	0.996105	0.990422	0.754151	0.940354	0.916346	-1.08657	0.112233	2.51813	0.812581	other_trend	0.0171519	0.0295814
EIF3H	-	-1.07946	-1.16855	-1.7484	-1.09385	-1.08541	-1.77055	-3.68372	-1.64938	-1.28555	-1.53672	-6.87253	-1.2026	-5.27235	-5.08618	-3.6574	-1.55113	-1.27249	-0.820543	-1.07085	-1.60377	-0.919338	-1.82594	-2.95707	-6.43949	-1.47104	-1.41295	-4.71701	-2.13023	-4.05683	-4.72197	-0.463886	-1.51021	-0.615681	-0.62953	-1.429	-1.79353	-0.635715	-0.798871	-0.800371	-0.755228	-0.943203	-2.50544	0.457904	1.7745	0.539328	other_trend	0.0095014	0.0182096
MAT2B	-	0.559731	-4.27632	1.31123	-4.74379	1.08713	-5.44001	-5.83059	0.483139	0.849077	-3.83415	0.813361	1.02854	0.0245463	0.421036	0.864348	-5.16737	-6.54901	1.6466	1.31248	0.299264	0.340222	-5.02688	-3.05826	0.880458	-0.324633	0.153465	0.937213	-5.42458	0.941007	0.653119	0.898155	1.27147	0.988183	0.980173	0.794884	0.755957	0.457884	1.30146	1.06839	1.04079	0.955734	-1.16899	0.248941	2.79329	0.0350695	linear_increasing	0.0223483	0.0369333
EEF1B2	-	0.758621	0.572755	1.00055	0.844624	0.871177	0.0527531	-5.7892	0.261883	0.437229	0.393825	-4.55629	1.21478	-0.597889	-4.86681	-5.04058	-0.530089	0.899228	0.545089	1.17906	0.652942	0.070701	-0.242544	-4.94025	-4.4789	-4.88714	0.537691	-5.07171	-4.32649	-2.80304	0.749246	0.580471	0.86167	1.4241	0.79912	0.39069	0.409691	0.599885	0.691381	1.28285	0.782342	0.78222	-1.23629	0.340508	2.54551	0.750139	other_trend	0.0177279	0.0304224
GATD3A	-	0.185168	-1.27053	-1.54951	-1.2025	-0.511781	-1.65861	-4.47877	-1.86057	-1.09018	-1.11448	-1.18806	-1.07478	-1.69681	-4.05524	-1.19505	-4.6496	-1.04347	-1.23227	-0.531496	-6.10177	-1.30938	-3.49857	-3.51309	-3.65419	-1.83011	-0.73165	-5.90394	-1.42251	-2.8893	-0.666676	-0.295544	0.883369	0.196617	-0.542838	-0.0544289	-0.273509	-0.956882	-0.466788	-1.07258	-0.236784	-0.281937	-2.09132	0.56015	1.63493	0.253056	other_trend	0.00156164	0.00398602
HSPA2	-	-0.834927	-1.5167	-1.29603	-1.41314	-1.01317	-1.57795	-2.62069	-1.78674	-0.847524	-1.01492	-4.31083	-6.58279	-1.99638	-5.10851	-1.45569	-1.84117	-1.33957	-1.10276	-3.53023	-4.38243	-4.66534	-1.27743	-1.81577	-3.45984	-3.28746	-1.83547	-2.03146	-3.38568	-3.08406	-2.07455	-1.14331	-1.71629	-1.03786	-0.218236	-0.797374	-0.691098	-3.00622	-1.16543	-0.706278	-0.661391	-1.11435	-2.41631	0.774965	1.4536	0.568846	other_trend	0.010513	0.0198098
SRP9	-	-0.29159	-0.771585	-0.616209	-0.929392	-0.229226	-3.3537	-1.36024	-5.1968	-0.335425	-0.631845	-4.27279	-0.823457	-4.52707	-0.668866	-1.13243	-0.538172	0.0295994	-3.54712	-0.300201	-0.421679	-4.54677	-1.28518	-2.67988	-5.43479	-5.382	-0.831774	-0.624689	-3.53004	-1.22246	-0.82465	-0.0519649	-0.529515	-0.861417	-0.474678	-0.00529529	-0.723146	-0.223158	-0.31259	-0.6681	-0.470098	-0.431996	-1.87601	0.283248	1.81028	0.352367	other_trend	0.0172154	0.0296223
LEMD2	-	-1.55315	-7.02492	-1.70423	-6.59032	-1.26787	-1.88299	-2.74689	-2.3743	-1.62905	-2.10609	-2.41518	-1.30858	-5.88756	-2.85548	-2.90251	-4.70329	-1.20997	-1.86398	-1.94143	-2.16723	-1.64117	-4.38511	-4.31326	-5.80295	-3.98599	-1.36352	-3.58621	-0.931962	-1.79777	-1.50155	-1.07845	-2.11356	-1.41699	-1.75804	-1.24161	-1.17403	-1.80029	-1.69845	-1.65775	-1.59947	-1.55386	-2.84815	0.322488	1.71848	0.0322421	linear_increasing	0.0241661	0.0394959
MCAM	-	-0.480532	0.228538	-1.22175	-0.920451	-0.0677861	-0.411198	-5.32914	-1.43207	-0.248199	-1.02972	-1.32149	-0.757302	-4.4459	-6.72156	-0.524046	-2.07536	-0.800377	-1.41778	-1.80863	-0.540951	-2.80772	-5.98738	-1.37178	-3.84913	-4.39696	0.126909	-4.02381	-5.60813	-1.51669	-4.4831	-0.0200233	-0.683582	-0.602783	-0.576552	0.109524	0.408801	-0.948	-0.553324	0.0735744	-0.336678	-0.312904	-2.17478	0.432962	2.03724	0.879132	other_trend	0.00711307	0.0142114
EML2	-	-1.33788	-1.43979	-2.43364	-0.991167	-0.995866	-1.59699	-2.00903	-5.65632	-4.99058	-2.10316	-4.39909	-1.81612	-2.04394	-4.09537	-2.06047	-1.51466	-5.9417	-4.58945	-5.94407	-1.41012	-2.05303	-1.88207	-2.49236	-1.69127	-1.05152	-4.84069	-1.94906	-4.01246	-1.84833	-1.06367	-0.841991	-1.20564	-1.15829	-1.64248	-1.83502	-1.17349	-1.86786	-0.767546	-1.18382	-1.26641	-1.29425	-2.67513	0.376912	1.6041	0.142444	other_trend	0.0109382	0.0205105
COPS4	-	-1.96465	-2.43635	-2.3841	-4.83291	-5.26779	-2.77797	-2.46077	-4.06981	-4.58819	-4.54995	-1.96409	-1.86069	-2.10264	-2.41765	-2.43367	-6.9698	-1.85432	-2.05641	-2.03043	-2.19567	-5.28144	-2.12964	-5.0608	-2.42388	-2.38399	-2.07617	-1.95782	-5.86461	-2.2391	-1.95602	-1.38815	-1.89114	-2.07493	-2.00198	-2.00384	-1.50388	-1.91162	-1.94301	-2.08104	-1.57124	-1.83708	-3.08638	0.252547	1.46896	0.03702	linear_increasing	0.0115518	0.0213487
PGRMC1	-	-0.296317	-2.09046	0.16343	-5.32824	-4.35646	-5.41669	-5.3371	-3.90726	-0.351319	-0.350629	-1.06139	-0.160063	-4.81569	-0.885541	-1.55608	-2.0845	-0.0578981	-0.78221	-0.152116	-2.3612	-0.600516	-1.46536	-3.96523	-0.574493	-0.356734	-3.4727	-5.13238	-1.22367	-1.03581	-0.53955	-0.211361	-0.152979	0.19577	-0.171644	0.652803	-0.347039	-0.209373	0.312696	-0.0260911	0.146411	0.0189192	-1.98514	0.305979	1.90305	0.00367717	linear_increasing	0.00217827	0.00528616
CD55	-	-0.11189	0.480393	0.523067	0.114052	-1.52635	0.0756708	-4.65688	-1.45107	0.521327	0.462427	0.125911	0.181036	-5.45829	-3.43637	-4.44956	-4.86199	0.621316	0.628948	-2.04508	-0.971647	-4.96257	-3.89282	-6.74532	0.351798	0.315385	-2.01325	0.229033	-2.18945	-4.91001	-0.398391	2.59398	1.96612	3.49406	3.61067	2.93703	3.08295	2.07107	3.3282	1.42038	3.64691	2.81514	-1.64835	0.774899	2.3141	0.0252312	linear_increasing	6.7919e-07	5.30652e-06
AKR1B1	-	1.15583	-1.92307	-0.453419	-1.49945	-2.20465	-5.70538	-4.90892	-2.65284	-0.0364456	-1.85248	-1.9155	-1.41773	-7.22212	-0.360539	-5.64018	-3.72372	-2.03722	-0.465887	-0.737642	-0.712805	-1.59088	-2.23839	-0.218282	-1.48377	-6.71962	-2.09822	-6.03295	-1.77328	-5.06801	-3.46834	-2.0031	0.391925	-0.008308	-1.05523	-1.23951	-1.81279	-1.30903	-0.873057	-0.760835	-0.0221742	-0.869209	-2.5002	0.788954	2.1783	0.610565	other_trend	0.0269788	0.0432832
NIT2	-	-1.36055	-1.02586	-0.817827	-1.24594	-1.49121	-1.87179	-4.0086	-4.89666	-1.2137	-1.42357	-1.79153	-1.16837	-5.12306	-3.61823	-1.72557	-3.75415	-1.00125	-1.00026	-0.809844	-3.59986	-1.37191	-5.40095	-4.89293	-0.752169	-1.78049	-1.3226	-5.34249	-1.14106	-0.954854	-0.518734	-0.435121	0.668251	-0.17129	-0.71505	-0.43064	-0.781816	-0.990405	-0.21556	-0.121568	-0.28003	-0.347323	-2.2142	0.457948	1.61268	0.0329585	linear_increasing	0.000947842	0.00261371
TBXAS1	-	-1.8626	-2.8526	-3.25875	-1.90994	-2.59129	-4.23287	-4.93388	-3.18573	-2.24842	-2.65919	-3.73143	-2.49573	-3.39905	-4.99188	-3.57505	-4.58029	-2.28447	-1.77179	-1.57828	-1.91414	-1.74518	-2.82377	-4.09404	-7.23447	-3.89188	-2.26779	-6.62759	-4.802	-3.91654	-1.69179	-1.73198	-0.0501373	-1.57127	-2.11218	-2.72969	-3.79285	-2.39902	-2.06893	-2.29553	-2.43758	-2.11892	-3.30508	0.949756	1.4373	0.34563	other_trend	0.020033	0.0336274
GUK1	-	-1.2161	-2.04613	-2.02813	-1.98253	-1.77531	-2.16732	-5.32763	-2.67662	-1.94091	-1.47629	-1.92069	-1.78165	-4.26744	-4.32906	-2.1037	-4.759	-1.31893	-1.01271	-0.84379	-0.734487	-3.92083	-2.63884	-5.44776	-1.27333	-2.11914	-1.88477	-4.28038	-1.41296	-2.44239	-1.71138	-1.88661	-1.23987	-1.34892	-1.4059	-1.18008	-1.89747	-0.909748	-0.970422	-1.67883	-1.67205	-1.41899	-2.42801	0.354956	1.33898	0.163217	other_trend	0.0248082	0.0402715
RFTN1	-	-1.00485	-4.18207	-4.74816	-3.79435	-1.91498	-6.44056	-2.35677	-2.68597	-1.28689	-1.45656	-1.83558	-1.35648	-4.3845	-3.20944	-2.78992	-5.92174	-1.60687	-2.23268	-1.21342	-1.41663	-2.32346	-2.20548	-4.22617	-3.31625	-1.48749	-2.23983	-2.76096	-1.86477	-2.36475	-1.57288	-1.4834	-1.52527	-1.11917	-0.777277	-2.38129	-1.62069	-2.05009	-0.445073	-1.83363	-1.46104	-1.46969	-2.67335	0.57529	1.40048	0.00722364	linear_increasing	0.0123698	0.0225354
ABHD14B	-	-1.12272	-1.44122	0.215445	-0.414625	-0.517164	-0.951992	-0.685535	-0.56062	-0.635679	-0.436304	-6.91013	-0.029086	-4.69252	-4.58223	-0.871048	-7.11151	-0.119386	-0.928925	-0.390941	-1.01149	-0.496605	-4.77325	-6.48154	-0.587681	-0.462876	-7.77323	-4.10137	-1.21155	-5.36093	-0.105445	0.642831	1.53233	1.29926	0.610127	0.354356	0.231944	0.23348	1.55068	0.558104	0.975266	0.798839	-2.15174	0.510044	2.5218	0.213688	other_trend	0.000797235	0.00226669
TUBB4A	-	-4.99309	-2.24135	-2.06728	-1.44305	-1.88425	-5.41679	-1.43261	-3.34239	-1.82026	-2.59981	-1.51736	-2.4162	-5.33507	-4.98634	-2.40618	-2.11953	-1.5677	-1.66123	-1.71553	-1.54706	-6.98753	-1.36335	-2.41521	-2.04512	-3.88479	-1.49438	-4.32636	-1.87894	-2.01093	-1.88457	-1.68326	-1.71374	-1.94829	-1.35044	-1.06003	-1.67132	-0.842667	-1.6189	-1.62992	-1.50335	-1.50219	-2.69348	0.331426	1.49742	0.0393413	linear_increasing	0.0178886	0.0306434
SNX12	-	-5.59077	-1.83808	-1.69068	-1.74677	-1.72348	-1.95333	-4.04777	-1.93404	-1.48461	-1.78917	-2.01799	-1.63403	-3.63004	-4.24797	-4.39257	-2.01482	-1.23615	-1.87217	-1.45088	-3.33173	-2.33161	-1.30145	-6.53618	-2.35037	-1.97714	-1.48245	-2.79551	-1.76758	-2.25497	-1.59358	-1.23937	-1.43237	-1.60119	-1.35506	-1.19895	-1.42019	-1.87214	-1.30708	-1.09358	-1.50369	-1.40236	-2.46726	0.222687	1.311	0.0398674	linear_increasing	0.0154796	0.0272452
MMRN2	-	-4.37749	-2.42548	-3.51378	-5.16117	-1.28504	-2.39221	-2.53094	-2.77139	-2.42988	-1.57307	-1.50223	-2.76209	-3.85329	-5.52945	-1.15184	-1.8173	-1.29677	-1.47476	-3.25212	-4.2679	-2.26085	-0.897168	-4.26091	-5.26225	-1.30503	-4.81631	-1.28948	-1.14049	-1.59536	-3.34938	0.37155	-0.662208	-0.460853	0.464142	-0.33603	1.17175	-1.40384	0.314748	0.490718	1.18495	0.113492	-2.71818	0.821667	1.41652	0.000248906	linear_increasing	6.39517e-07	5.05823e-06
SLC9A3R2	-	-1.68902	-5.33232	-2.75389	-3.38525	-0.631034	-5.63368	-2.33906	-2.58711	-4.72891	-1.08108	-1.26573	-1.57574	-3.95128	-4.65913	-1.40442	-1.1855	0.267681	-4.75535	-1.00855	-2.24522	-0.570038	-0.0686381	-3.56292	-1.00042	-0.582317	-0.419068	-1.05998	-1.42182	-1.72748	-0.635865	0.901633	0.389797	0.150059	1.24827	0.104883	1.01734	-0.0618094	0.672941	0.331716	1.07201	0.582684	-2.09977	0.460949	1.66599	1.26944e-06	linear_increasing	1.37551e-05	6.93894e-05
METTL7A	-	0.981493	0.630357	1.11591	0.610714	0.690495	0.221777	0.427275	-6.31249	0.385044	-0.00831762	-0.0496575	0.831804	-1.90724	-4.42657	-5.09277	-3.67125	1.05496	0.968867	1.10915	-3.46653	0.557445	-4.98653	0.203336	-0.771937	0.00934571	0.695207	-4.71505	0.376472	-4.68306	0.95952	1.79256	1.02259	1.82002	1.57874	1.26209	1.72128	0.936086	1.88547	1.54272	1.61219	1.51737	-0.942075	0.334277	2.40129	0.259648	other_trend	0.00276441	0.00641691
TUBA4A	-	0.212174	-0.526574	-0.494061	-0.217892	-0.265719	-2.31079	-0.476525	-5.64779	-0.413628	-3.56655	-0.639575	0.171283	-0.458152	-4.11375	-0.304035	-4.78252	-0.0165194	0.0582388	-0.355048	-0.434697	-5.53946	-0.750497	-0.798391	-3.63465	-0.0517923	0.0231225	-0.720432	-2.66065	-6.3672	-0.0117709	0.0264851	-0.132619	-0.600789	-0.0513015	0.249849	0.10481	-0.254396	0.113798	0.343095	0.196665	-0.000440382	-1.50313	0.276754	2.01163	0.484054	other_trend	0.0249301	0.0404352
EIF3B	-	-0.617153	-1.44083	-1.05022	-0.944356	-0.830056	-1.84503	-4.77881	-1.03729	-0.976835	-1.09732	-0.395754	-0.651981	-1.78127	-4.44625	-0.856153	-3.66326	-0.627758	-0.790492	-0.607499	-4.22901	-1.5397	-1.2232	-5.47906	-4.43973	-1.06336	-4.78016	-3.47838	-3.70953	-0.817094	-0.478858	-0.479432	-0.251681	-0.0576397	0.180489	-0.600683	-0.668272	-0.400484	-0.364621	-0.32963	-0.125852	-0.309781	-1.98921	0.257055	1.63149	0.316455	other_trend	0.00266488	0.00623102
ANP32A	-	1.5203	1.89298	1.90198	1.41605	1.82289	0.291425	-3.80392	1.32703	1.38945	1.19404	-5.95376	1.9187	-3.8452	-4.66768	1.32436	1.45925	1.75151	1.14282	2.55867	-0.558553	0.927511	-6.13294	-5.12878	0.606004	0.682687	1.6553	-3.80544	-3.95293	-3.52103	1.95086	2.0649	2.02391	1.70077	2.11766	1.53989	2.07624	0.939329	1.94296	1.91042	1.69543	1.80115	-0.421214	0.358908	2.84465	0.569187	other_trend	0.01932	0.0326014
U2AF2	-	0.255054	-0.315649	-1.53511	-0.109006	-0.116891	-0.39162	-3.37218	-0.31802	-0.381779	-0.420272	-4.44358	-0.43618	-6.67626	-3.68196	-0.694308	0.0230988	-0.549328	-0.756861	-0.168282	-0.820801	0.012399	-3.99352	-4.43115	-1.42325	-1.06981	-0.940354	-5.83487	-3.4632	-5.03961	-0.168954	0.108406	0.117671	0.109912	-0.208838	-0.53709	-0.420399	-0.565864	-0.229813	-0.479514	-0.306555	-0.241208	-1.70874	0.27113	2.01827	0.758109	other_trend	0.028759	0.0457951
HLA-DRB1	-	2.95317	0.226498	1.41167	0.552881	1.9332	-3.35992	-3.51255	-5.41537	1.47464	1.24934	-4.16292	2.18663	-0.208447	0.193683	-4.69156	1.27297	1.41403	0.656234	1.95802	1.69828	0.437137	-0.147756	-5.71821	0.100722	0.494655	0.918626	-4.6809	-4.09677	-3.96246	1.65158	2.34406	2.67668	2.30202	3.08294	1.84512	3.06038	1.9631	2.18051	0.420116	2.04396	2.19189	-0.57243	0.756625	2.67666	0.160731	other_trend	0.00278757	0.00645507
PPP1CC	-	-5.72544	-3.16681	-2.89218	-4.63535	-2.4849	-2.88076	-4.63574	-2.86843	-6.14312	-3.01168	-2.92693	-2.89297	-3.53178	-5.70431	-3.45226	-3.12903	-3.26169	-2.49324	-3.24801	-3.03806	-2.89285	-2.71259	-3.26466	-4.52405	-3.03583	-2.20853	-3.34735	-4.39033	-3.15169	-2.54634	-2.77778	-2.73455	-2.737	-2.3922	-2.79882	-3.23087	-2.88999	-2.53567	-2.62214	-2.16701	-2.6886	-3.47323	0.288076	1.01531	0.00860868	linear_increasing	0.0217614	0.0361186
NCKAP1	-	-5.15951	-4.6204	-1.63829	-1.70275	-4.21118	-3.07622	-5.17852	-2.21946	-1.12643	-1.32321	-1.15792	-1.51577	-2.37357	-4.25408	-4.1218	-2.58988	-0.768188	-0.902914	-1.1614	-1.83334	-2.43388	-2.19804	-4.36985	-4.71402	-1.17732	-2.12668	-4.65361	-2.86469	-1.39723	-0.773361	-0.68985	-1.24401	-0.541795	1.11179	-0.469067	-0.741911	-0.709395	0.727889	-0.42627	0.046608	-0.293602	-2.58812	0.720991	1.46379	0.000161053	linear_increasing	2.99132e-05	0.000134007
MMP28	-	-2.67492	-1.88549	-5.43865	-1.73045	-3.52506	-2.30521	-5.48813	-5.74699	-1.99335	-2.15774	-3.67413	-0.904249	-1.06845	-1.96484	-3.52141	-2.42755	-0.420561	-4.45921	-1.80384	-1.58181	-4.47483	-2.12667	-2.99935	-1.61762	-1.95519	-2.34701	-1.9891	-1.52951	-1.86862	-1.32566	-0.149252	-1.36114	1.85246	-0.00610645	-0.946497	-0.379825	-0.630593	-1.03894	-0.609608	0.137172	-0.313233	-2.56685	0.896481	1.38469	1.24176e-05	linear_increasing	2.47876e-05	0.000115635
QSOX1	-	-2.91185	-1.8273	-2.17348	-2.87341	-2.95646	-2.82584	-3.84709	-2.70451	-1.24918	-2.31934	-3.62392	-2.02005	-1.54656	-2.04123	-2.48175	-1.71444	-1.62538	-2.05744	-2.96015	-3.06784	-4.42342	-1.63002	-2.04296	-6.07037	-4.12306	-1.43617	-5.82491	-3.03971	-3.99984	-1.8701	-0.772206	-1.82604	-0.364293	-0.313726	-0.112136	-0.19899	-1.13792	-0.756385	-1.54268	0.442948	-0.658143	-2.77626	0.693265	1.20693	0.0301348	linear_increasing	6.26153e-06	3.56055e-05
LAMC2	-	-4.15044	-3.828	-4.90389	-4.2334	-3.31225	-6.27199	-3.28835	-4.00763	-5.14125	-2.49785	-6.48107	-3.38327	-6.03735	-5.13133	-5.45651	-1.52546	-0.249752	-4.04201	-4.84114	-4.61611	-4.83263	-0.903996	-3.98136	-4.77084	-1.36638	-3.65916	-3.65934	-1.15923	-1.52481	-0.880531	2.81232	1.19588	3.28665	3.20117	2.77738	3.60195	0.481046	3.11802	1.46247	3.08274	2.50196	-3.67124	1.05799	1.70916	5.84808e-09	linear_increasing	4.98101e-13	2.65931e-11
SCEL	-	-3.20942	-2.99376	-4.39393	-5.57199	-2.17269	-4.9226	-2.72147	-2.24983	-1.353	-0.899296	-2.06268	-4.51589	-5.6382	-1.88949	-3.10171	-2.94769	0.156775	-4.70102	0.298923	-2.74614	-1.16145	-2.84965	-3.96576	-1.25816	-0.461799	-1.02287	-2.06964	-1.36146	-2.35699	0.461365	1.37874	-0.20092	0.953938	1.34831	0.663646	2.5459	-1.99817	0.419226	0.640855	1.95339	0.770491	-2.45605	1.24942	1.66844	6.51421e-07	linear_increasing	2.04526e-06	1.32804e-05
PAPSS2	-	-3.31414	-2.52943	-3.00144	-4.94594	-2.35027	-5.8071	-2.78247	-3.04589	-3.51563	-1.95341	-3.04115	-3.98805	-5.5449	-3.9085	-5.6795	-5.19696	0.369789	-1.46176	-2.07006	-3.54464	-2.32802	-1.89991	-4.98022	-2.78304	-1.15879	-2.74497	-2.9553	-2.09979	-2.78644	-0.650365	0.599366	0.917984	1.5062	1.66157	-0.492318	1.73385	-0.191111	1.05086	0.875402	1.91192	0.957372	-3.05661	0.808083	1.48969	9.36643e-07	linear_increasing	8.79214e-10	1.65956e-08
MAPK3	-	-1.53564	-1.38775	-0.800913	-4.55569	-1.42608	-2.69097	-2.0318	-1.70688	-0.597517	-0.830617	-1.61809	-0.918399	-4.80305	-3.33812	-1.81448	-0.761117	-0.803043	-0.76053	-0.992708	-6.49031	-1.47034	-0.850713	-7.32022	-1.52358	-1.1526	-4.1263	-1.07374	-0.819187	-3.04399	-0.858489	0.26328	-0.591736	0.174058	0.48694	0.0747134	0.113527	-0.971514	0.630753	-0.175807	-0.0652503	-0.00610365	-2.0701	0.480951	1.75516	0.044002	linear_increasing	0.000798546	0.00226707
AARS1	-	-0.409282	-5.05682	-0.769981	-1.5623	-1.68357	-2.85818	-3.77048	-1.57078	-0.919071	-1.3433	-3.92459	-0.451241	-2.96866	-1.60328	-2.20682	-2.16531	-1.90845	-1.3533	-0.51646	-1.0917	-1.53132	-2.21637	-5.51586	-3.603	-1.9074	-1.67867	-6.17653	-5.15452	-1.86888	-1.18449	-0.700934	0.324394	0.0947974	-0.16611	-0.478858	-0.413609	-0.749106	-0.534308	-0.674285	-0.0988242	-0.339684	-2.29902	0.363733	1.56203	0.0670177	other_trend	0.000379953	0.00119716
CFD	-	-1.73634	-4.46923	-1.34528	-2.12876	-2.00772	-2.04689	-3.74288	-1.38461	-1.19144	-2.11216	-2.01851	-1.46582	-1.8158	-3.7066	-4.69953	-2.34331	-1.13479	-0.916689	-2.32921	-2.69447	-2.83421	-1.80603	-1.83117	-2.27932	-2.41646	-1.85322	-4.89601	-3.77333	-3.08396	-3.65682	-1.63868	-1.52154	-0.853033	-1.77348	0.560523	-1.42523	-0.285712	-2.10477	-0.193863	-1.86452	-1.11003	-2.45735	0.877037	1.08371	0.173194	other_trend	0.00103664	0.00282908
NARS1	-	-0.800599	-0.812355	-0.787794	-0.38592	-1.12303	-4.49685	-6.34447	-1.09384	-0.253495	-1.09258	-1.18614	-0.937045	-2.64392	-1.55948	-1.02983	-5.49429	-0.747501	-5.48647	-0.783741	-0.215582	-1.20331	-1.23346	-2.13473	-3.70182	-1.32752	-0.767173	-1.21079	-1.46982	-4.77873	-0.445759	-0.580897	0.195092	-0.08762	-0.480949	-0.287665	-0.367109	-0.374275	-0.73432	-0.332547	-0.717668	-0.376796	-1.8516	0.282293	1.74124	0.177831	other_trend	0.0118284	0.0217553
DDAH1	-	-0.788083	-0.8233	-0.0438024	-0.713792	-0.530281	0.701676	-5.83738	-0.603487	-0.0941024	-0.034854	-0.593841	-0.369089	-3.69774	-5.70966	-3.76559	-4.12916	-0.694477	-0.374227	0.103463	-0.35676	0.107301	-0.354348	-4.68321	-0.571696	-0.225079	-0.0164288	-3.49647	-0.652052	-4.44564	-0.371948	0.504353	1.05632	0.635118	0.350644	0.39669	0.312621	-0.264042	0.646747	0.501487	-0.153862	0.398607	-1.43547	0.383823	1.93843	0.168967	other_trend	0.00543989	0.0114143
LIMCH1	-	-2.8618	-3.13945	-3.03971	-2.29831	-1.55498	-3.42041	-4.48456	-1.87597	-1.13569	-2.34686	-1.88977	-1.51098	-4.90591	-7.35222	-5.27902	-2.72872	-0.559893	-2.3868	-2.60399	-2.54107	-2.17304	-1.75969	-4.25203	-6.51254	-2.16507	-5.24144	-2.72738	-2.7716	-5.33461	-1.23298	0.718258	-0.645762	0.920643	0.670631	0.474072	1.41737	-0.464302	0.593161	0.332407	1.61604	0.563252	-3.06955	0.713434	1.64588	0.00361198	linear_increasing	5.78789e-08	5.94883e-07
SERPINB9	-	1.00609	-0.259623	-0.728331	-0.418253	-0.525634	-1.34884	-1.1949	-0.0496817	-0.403054	-0.411536	0.135209	0.111187	-6.71795	-3.7047	-4.36711	-0.685516	-0.159752	-1.02211	-1.4238	-0.23302	-1.30308	-0.895505	-4.77954	-3.98699	-4.45999	-0.470739	-5.2473	-0.260047	-4.65847	-1.07413	0.288718	0.450642	0.228224	0.569764	0.50027	0.407152	0.206861	1.20679	0.354204	0.551337	0.476396	-1.65124	0.286401	2.01062	0.639877	other_trend	0.00206796	0.00506967
FABP5	-	1.73144	0.816446	1.38766	-0.238422	1.28307	-0.292691	-4.87975	-1.08695	1.44718	0.259537	-0.129802	1.75491	-6.5347	-5.03489	-0.434471	-4.30328	1.946	0.666062	2.19863	-2.08547	1.75819	0.793165	-1.09045	-7.30803	-0.41863	1.36813	-3.58754	-5.91006	-4.03524	1.79506	4.3816	5.67297	4.08832	3.37824	2.76791	2.94195	3.15043	3.43753	3.77507	3.66253	3.72565	-0.93883	0.845008	2.87096	0.0545748	other_trend	1.22331e-05	6.23663e-05
TFRC	-	-0.934199	-0.705757	-0.987326	-0.265945	-0.803592	-4.78251	-5.89825	-3.92207	-0.606691	-0.940938	-1.90416	-0.0254145	-1.37719	-2.3708	-1.18561	-0.588662	-0.106828	-1.86606	0.561042	-1.04124	0.63489	-6.151	-3.02537	-4.91264	-2.47173	-0.914745	-1.33656	-4.07985	-2.66073	0.106811	-0.216563	1.52905	0.265869	-0.824765	-0.284306	-0.0802742	-0.619458	-0.961042	-1.40768	-0.224822	-0.282398	-1.81877	0.80035	1.85606	0.145222	other_trend	0.0159346	0.0278168
GALK1	-	-2.21701	-2.96454	-5.28723	-2.20304	-2.30402	-4.545	-2.35354	-4.90932	-3.90609	-1.89263	-2.46318	-1.83627	-2.67372	-5.33633	-2.02931	-2.23073	-3.13573	-6.79708	-2.1999	-1.77754	-2.47984	-2.40313	-2.35122	-2.59299	-2.60972	-2.42014	-6.68553	-3.12501	-1.85125	-2.94886	-1.85741	-1.44459	-2.08735	-2.73968	-2.03505	-1.53533	-2.2136	-1.78859	-1.85876	-1.33219	-1.88926	-3.08433	0.412891	1.40424	0.0471429	linear_increasing	0.0121741	0.022242
H2AC6	-	3.44631	2.61858	2.23948	2.06883	2.43249	3.05086	-5.08519	3.19601	2.65274	2.94136	-3.28475	1.95823	2.39603	-4.16176	-5.91785	2.30951	-5.8745	1.84703	2.69441	2.85595	3.2317	2.30275	2.67298	-2.76415	2.53021	1.47752	2.11611	-3.0369	-4.49935	1.25078	2.6583	2.82344	3.95874	3.76635	3.34131	2.90627	3.01712	3.16743	3.41748	3.04066	3.20971	0.655514	0.414216	3.15206	0.534191	other_trend	0.0155391	0.0273
VPS26A	-	-0.604245	-2.05285	-0.797554	-1.55615	-0.952521	-1.52067	-0.569799	-0.978217	-0.793861	-5.15744	-1.23072	-0.90009	-1.81593	-2.74548	-4.63646	-1.44289	-0.524918	-0.999948	-0.464682	-1.02044	-3.06712	-1.06766	-3.59196	-0.995828	-1.04721	-1.57761	-4.72325	-2.52348	-7.09987	-0.420827	-0.760563	-0.0878491	-0.91729	-0.390266	-0.528098	-0.641367	-0.561314	-0.737875	-0.48097	-0.635918	-0.574151	-1.89599	0.228255	1.64091	0.634183	other_trend	0.0161439	0.0280548
WASF2	+	-1.49537	-1.97525	-1.73245	-7.21238	-1.58677	-2.51012	-4.99912	-2.39768	-2.0378	-1.6458	-1.38606	-1.7699	-2.45066	-5.28504	-5.36539	-4.86814	-1.48969	-2.37802	-1.08758	-2.51854	-2.23902	-3.58824	-7.67753	-1.8984	-2.30135	-2.19513	-6.13928	-2.55137	-1.90926	-1.0673	-0.812986	-0.816426	-0.607128	-0.811533	-1.79401	-0.470316	-1.2999	-0.80011	-0.963648	-0.724587	-0.910065	-2.92529	0.379438	1.83145	0.0387021	linear_increasing	0.00148143	0.00380655
PDHA1	-	-1.42148	-3.98012	-1.89716	-1.60508	-1.41031	-6.4772	-5.27082	-4.1485	-1.13328	-1.54	-1.69796	-1.50241	-1.72364	-2.8088	-2.23419	-2.46022	-2.10295	-1.56055	-1.10648	-1.51616	-2.78727	-2.47377	-1.51559	-4.15419	-1.1951	-1.54505	-5.02217	-4.42401	-3.80305	-0.840436	0.0558458	-0.486483	-1.06677	-1.17931	-0.957656	-0.584844	-1.29098	-0.907565	-1.04948	-1.07716	-0.854438	-2.51193	0.40538	1.46195	0.0174151	linear_increasing	0.00116296	0.00311311
PXN	-	-0.922815	-2.487	-2.50635	-2.37531	-1.10191	-5.14604	-2.74079	-1.94198	-3.5132	-1.67077	-2.29095	-1.88377	-4.24473	-3.15223	-3.51887	-1.28834	-1.18851	-4.33642	-2.51469	-1.33115	-2.58692	-2.21346	-3.47676	-6.56537	-2.34307	-1.55835	-2.50497	-3.17974	-3.73805	-1.05602	0.540137	-0.12741	0.28508	-0.103946	-0.283759	0.937279	-0.0977138	0.764963	-0.555694	0.720843	0.207978	-2.64595	0.510952	1.29087	0.00237561	linear_increasing	5.07181e-08	5.35605e-07
FDPS	-	-1.52138	-0.968278	-0.985466	-1.64421	-0.770059	-4.96616	-4.92919	-6.41143	-0.380276	-0.988108	-1.25587	-0.78105	-1.94393	-1.72197	-1.34913	-6.3722	-0.732366	-1.11658	-0.801238	-3.54861	-1.4753	-1.01376	-5.47869	-1.26739	-1.07849	-4.62384	-4.58597	-1.43679	-1.46868	-0.635947	-0.699975	-0.343054	-0.00457781	-0.402197	-1.37977	-0.611609	-1.51485	-0.700877	-0.520424	-0.432551	-0.660988	-2.20841	0.462138	1.87355	0.0937434	other_trend	0.014386	0.0255544
SFXN3	-	-1.02815	-1.18497	-1.14729	-0.916597	-0.474102	-2.26886	-5.02234	-1.63709	-0.794813	-0.672071	-0.695955	-0.88045	-3.86248	-4.29224	-1.48257	-2.15223	-0.819741	-1.7365	-0.969362	-6.28441	-0.990849	-0.986791	-3.64612	-4.73237	-1.11338	-1.04267	-1.9422	-6.54559	-2.45268	-0.689335	-0.218758	-0.225341	0.298149	-0.420722	-0.264386	-0.582983	-2.27574	-0.663395	-0.544743	-0.387774	-0.52857	-2.08214	0.670544	1.73752	0.453314	other_trend	0.00929777	0.0178703
PSMA4	-	-1.47434	-1.82002	-1.15099	-1.42352	-6.67776	-3.66692	-0.933326	-1.24015	-4.75666	-0.920665	-0.955638	-0.633534	-1.1107	-0.979774	-0.129614	-1.20341	-0.486481	-2.93619	-0.881262	-1.44708	-0.987643	-2.76964	-4.0817	-1.06757	-0.826164	-2.62381	-4.31216	-0.30336	-0.472427	-0.344715	-0.216014	-0.0918675	0.127382	0.315086	-0.440521	-0.374756	-0.800334	0.238045	-0.356248	0.376144	-0.122308	-1.75391	0.383132	1.55604	0.00216841	linear_increasing	0.00237552	0.00567879
PFKM	-	-1.65442	-3.1415	-1.90185	-1.40193	-4.43312	-4.27591	-1.90316	-5.2655	-1.55066	-0.995059	-1.43488	-1.28489	-4.76748	-2.17141	-2.62105	-1.66318	-2.2658	-1.31798	-2.4548	-0.948612	-0.714308	-5.83602	-6.17813	-1.70292	-1.43632	-1.67862	-2.11917	-1.44814	-1.67977	-2.10426	-1.98773	-1.16594	-1.00309	-0.741907	-1.43521	-0.658345	-1.81029	-1.3381	-1.34713	-1.26735	-1.27551	-2.4117	0.418955	1.50083	0.0346675	linear_increasing	0.0243482	0.0396923
ENOPH1	-	-2.85035	-3.1727	-2.89105	-2.77964	-4.34954	-3.04173	-3.45507	-3.41385	-2.73186	-2.76063	-3.03338	-3.06892	-3.38385	-3.37206	-2.5128	-3.11966	-3.03416	-2.48707	-3.21927	-3.33189	-3.22651	-5.54627	-4.19525	-2.9972	-4.9345	-3.49473	-5.33723	-2.81097	-3.06566	-3.04463	-2.5018	-2.564	-3.12641	-2.64246	-2.90345	-2.82426	-2.6613	-2.71979	-2.6647	-2.84808	-2.74562	-3.35542	0.183786	0.76732	0.422958	other_trend	0.0181405	0.0309921
STX7	-	-1.12973	-1.20487	-1.06444	-0.934301	-3.94652	-1.55701	-5.47969	-3.53797	-1.17052	-0.942924	-1.5288	-0.779776	-1.94721	-6.26899	-1.85678	-1.53229	-0.780783	-3.80727	-0.485	-1.56236	-1.27792	-1.38718	-4.74761	-0.504368	-1.69614	-1.60338	-4.36443	-2.09757	-1.98151	-0.678213	0.0490748	0.32247	-0.213327	-0.364145	-0.426499	-0.205112	-0.372535	-0.316277	0.444902	-0.0976047	-0.117905	-2.06185	0.301061	1.54526	0.0140623	linear_increasing	0.000357048	0.00113617
SUSD2	-	-3.04872	-3.43762	-3.07365	-5.19562	-2.93814	-4.54836	-2.57491	-6.48858	-1.63072	-5.32337	-2.3745	-1.84112	-3.15439	-2.14079	-2.62196	-0.547289	0.631113	-2.71349	-1.36639	-2.67031	-4.27509	-1.38085	-3.90348	0.0220567	-2.34799	-0.718513	-4.89121	-2.15686	-0.910297	-0.27115	3.35368	2.17756	3.96935	3.16274	1.43718	3.79923	1.946	3.80134	1.98187	3.586	2.92149	-2.59641	0.938096	1.68958	4.4354e-09	linear_increasing	6.29685e-12	2.2835e-10
GNAS	-	-0.540811	-5.15818	-2.02441	-1.48756	-1.65812	-6.23498	-0.824537	-3.53192	-1.94695	-1.71255	-0.965369	-1.88002	-1.28798	-3.79893	-0.921122	-2.79454	-0.181811	-1.17158	-2.04827	-1.18227	-2.0399	-4.39005	-2.43362	-1.75259	-0.71276	-1.03154	-3.01936	-1.38591	-1.66624	-1.39653	-0.407231	-0.202556	-0.37078	-0.56496	-0.273653	-0.549884	-0.800919	-0.267571	-0.525339	0.191739	-0.377115	-2.03935	0.267588	1.38865	0.0012029	linear_increasing	0.000621594	0.00183518
FAH	-	-2.2417	-2.2918	-1.94108	-2.41329	-1.95064	-2.50239	-2.08189	-2.70531	-1.48054	-1.54689	-4.59071	-1.69868	-3.32305	-1.3839	-4.50927	-1.14006	-1.2688	-1.34659	-1.73099	-1.59581	-2.03988	-1.23067	-1.50749	-6.32432	-5.10628	-1.37778	-3.97906	-1.26377	-3.26574	-1.42216	-0.542232	-0.295535	-0.807326	-0.674624	-1.65772	-1.51477	-0.992408	0.0836212	-0.510727	-1.7028	-0.861451	-2.37535	0.602037	1.31906	0.0499649	linear_increasing	0.00125015	0.00329289
HNRNPUL2	-	0.910873	0.925734	1.09682	0.413556	0.339566	0.0596278	-4.13554	0.169079	1.23754	0.602605	0.448415	1.28401	-4.06136	-4.81789	-0.773818	-3.4705	0.994865	0.778365	0.931892	0.179565	0.857556	1.46164	-2.92114	0.417771	1.35816	0.648073	-4.81563	0.148371	-2.87572	1.33257	1.22762	2.03075	2.10376	1.87622	1.18574	1.2921	0.903543	1.97452	1.45893	1.30408	1.53573	-0.375831	0.423238	2.0491	0.189963	other_trend	0.00608646	0.0124714
PSMB8	-	-0.928825	-1.1003	-1.52992	-5.07373	-1.55187	-3.96763	-5.09309	-3.78713	-0.859238	-1.54043	-1.57935	-1.39679	-1.72105	-6.82084	-1.29749	-1.56908	-0.880798	-1.18842	-1.19598	-1.48089	-1.75117	-0.807195	-5.1881	-5.10012	-1.27605	-1.35692	-1.69946	-1.2997	-1.44764	-0.366934	-0.462178	-0.654263	-1.12563	-0.385788	-0.598256	-0.415737	-0.552257	-0.646497	-0.801887	-0.391938	-0.603444	-2.16187	0.227656	1.68463	0.0130725	linear_increasing	0.00630292	0.0128328
CYP27A1	-	-1.2766	-1.76581	-4.70445	-1.52997	-1.95894	-3.1058	-6.44507	-1.58016	-1.14477	-2.58355	-1.44424	-1.32376	-2.44326	-5.84525	-1.63286	-2.20329	-1.73868	-2.29145	-1.25764	-5.58449	-1.43636	-1.97679	-4.89404	-2.97472	-2.5404	-1.79312	-5.25697	-1.9704	-4.17059	-0.537874	-0.966868	1.42587	-1.14357	-1.9622	-2.20559	-1.80141	-1.76925	-1.68502	-0.901791	-0.445476	-1.14553	-2.64704	1.05906	1.60493	0.101173	other_trend	0.00901035	0.0173903
APMAP	-	0.493265	-5.09533	-0.529541	-0.723379	-0.290794	-4.3513	-3.36495	-1.4329	-0.0862648	-5.15657	0.407394	-0.0228823	-3.3596	-0.507814	-4.12299	-0.408022	-0.409535	-0.354222	0.0801225	-0.0033899	-1.20282	0.208607	-6.32822	-0.41526	-0.079962	0.287552	-1.74638	-0.895839	-1.01304	0.370722	0.840767	0.595549	0.471493	0.662764	-0.164111	0.588437	-0.195719	0.901775	-0.081327	0.528988	0.414862	-1.33511	0.410036	1.93441	0.00531044	linear_increasing	0.00765931	0.0151142
STX12	-	-1.58083	-7.06705	-2.13429	-2.08239	-1.58073	-4.15029	-2.01833	-1.58173	-1.16792	-1.59833	-1.49075	-1.67496	-3.29338	-4.93874	-1.94118	-1.85041	-1.199	-4.90861	-1.51845	-1.14175	-1.71794	-1.32854	-2.94643	-1.87072	-1.18135	-1.81672	-6.03323	-1.43877	-1.99672	-1.4118	-0.950355	-0.715484	-1.33611	-1.05585	-1.05496	-0.971574	-1.7565	-0.975077	-1.44115	-1.33647	-1.15935	-2.35538	0.303706	1.52858	0.0186114	linear_increasing	0.0195561	0.0329132
PPA2	-	-0.566202	-1.43656	-4.21282	-0.479753	-0.582114	-4.33813	-0.859325	-6.24586	-0.60218	-0.449824	-7.13685	-0.584405	-0.668655	-1.19336	-0.697058	-5.87597	-0.168828	-1.79683	-0.24279	-0.44595	-1.08715	-1.04739	-2.64788	-1.08306	-0.823473	-0.548673	-4.51625	-1.69291	-0.624385	-0.0230796	-0.00798787	1.17976	0.247699	-0.12363	-0.616907	-0.283406	-0.637716	0.174109	-0.739577	-0.0359396	-0.0843593	-1.75592	0.562093	1.98361	0.00953973	linear_increasing	0.0129012	0.0233485
UQCRQ	-	-2.15818	-1.81405	-1.42681	-1.66679	-1.62422	-1.70447	-2.70806	-4.1682	-1.25546	-1.60735	-6.3653	-1.73833	-4.6263	-4.69701	-1.95379	-2.27942	-1.50106	-1.83958	-1.49012	-1.86042	-2.06234	-1.64737	-5.62385	-2.27734	-1.92183	-1.36003	-4.08085	-2.42471	-4.68132	-0.753592	-0.878842	-0.75742	-1.33568	-1.39042	-1.36514	-0.537129	-2.71583	-1.13139	-1.33693	-0.750681	-1.21995	-2.51061	0.609141	1.43543	0.149952	other_trend	0.00923399	0.0177833
DHX15	-	-0.381456	-0.733761	-1.01901	-1.3339	-0.962148	-0.782513	-2.25966	-1.63342	-0.637815	-1.0259	-1.29366	-0.632137	-1.72221	-5.00152	-3.08531	-4.94866	-0.855982	-2.71692	-0.906351	-0.939836	-0.196134	-0.960564	-5.36854	-1.65885	-1.37188	-0.862469	-4.14208	-1.70733	-6.23419	-0.632527	-0.454476	-0.64388	-0.769144	-0.679904	-0.645293	-0.507743	-1.18524	-0.690027	-0.660108	-0.688482	-0.69243	-1.86689	0.19587	1.641	0.943596	other_trend	0.0311108	0.048892
DLAT	-	-0.647107	-1.18812	-0.653143	-0.916047	-0.679605	-1.35745	-2.50749	-1.2891	-0.442458	-1.19786	-1.14886	-0.899794	-1.51852	-6.72142	-0.82404	-4.89746	-0.596335	-0.907556	-0.698068	-0.376122	-0.150748	-1.47786	-3.40955	-3.97753	-1.24598	-0.455401	-6.03776	-3.31931	-0.974918	-0.351458	0.480952	-0.048948	-0.429815	-0.472261	-0.0453401	-0.556305	-0.371666	-0.198655	-0.550675	-0.301521	-0.249423	-1.69557	0.316693	1.70977	0.357724	other_trend	0.0120335	0.0220536
CASP1	-	-1.30392	-3.08522	-7.50948	-1.16969	-1.43987	-5.08406	-2.78352	-2.17896	-1.45661	-1.97564	-1.98176	-1.44593	-1.97451	-4.84522	-2.08677	-6.25578	-1.23441	-2.17461	-1.12651	-1.24084	-1.54651	-4.84592	-2.89982	-3.8516	-2.16834	-1.65233	-2.10926	-2.19015	-2.04178	-0.957386	-0.975312	-1.18933	-0.974293	-0.689167	-1.77043	-1.17536	-1.75557	-0.770274	-1.03646	-0.686261	-1.10225	-2.55388	0.391142	1.62499	0.00962842	linear_increasing	0.0085018	0.0165389
RAB21	-	-1.53779	-1.68142	-1.47132	-1.72921	-1.34928	-2.77188	-2.61306	-2.62175	-1.4659	-1.75225	-1.61415	-1.66518	-4.48478	-4.34602	-3.73596	-2.4411	-1.46584	-1.70476	-1.46454	-1.96834	-2.02775	-1.89269	-5.46965	-3.10984	-2.54701	-1.41482	-2.12517	-4.9321	-6.17623	-1.04884	-0.199997	-0.794051	-0.611049	-0.707285	-0.694331	-0.502791	-1.17535	-1.06885	-0.618036	-0.777461	-0.714921	-2.48762	0.274518	1.3436	0.247644	other_trend	0.00020376	0.000709467
LRRC47	-	-1.90336	-1.58714	-1.88705	-2.09902	-1.68968	-1.95019	-2.77473	-2.18271	-1.4721	-1.87266	-2.7171	-1.55305	-4.41848	-4.29548	-2.43933	-1.19128	-1.38843	-1.8139	-2.0587	-2.1896	-1.57345	-2.03829	-2.65085	-5.36548	-6.27668	-2.11956	-7.17568	-4.87852	-4.41599	-1.90315	-1.84529	-1.5619	-1.76167	-1.74394	-1.48322	-1.60982	-1.56799	-1.71603	-1.38694	-0.739626	-1.54164	-2.72939	0.314162	1.54869	0.799397	other_trend	0.0219607	0.0363866
TBCA	-	-6.05339	-0.403327	-0.2678	-0.926344	-0.402097	-5.50879	-0.988923	-1.69395	-1.13605	-0.689274	-2.94626	-0.571198	-0.7058	-1.47724	-1.63854	-1.28968	-0.389661	-4.12493	-0.169024	-5.10801	-0.656558	-1.62083	-4.15195	-1.06154	-1.08493	-4.07199	-1.40545	-0.808583	-1.25229	-0.855164	0.0129817	-0.104461	0.0841656	-0.146374	-0.962893	0.215691	-0.405072	0.126074	0.0850429	-0.217135	-0.131198	-1.78199	0.345688	1.68181	0.0187735	linear_increasing	0.00407812	0.00899078
SYNPO	-	-2.71889	-1.77583	-1.82286	-1.82776	-1.66562	-5.09214	-4.10489	-1.75357	-1.81036	-1.99425	-4.34563	-2.01031	-2.94265	-2.44516	-2.56139	-2.10598	-1.54559	-3.64196	-2.03925	-2.35031	-2.23469	-1.35495	-5.215	-2.22554	-2.12983	-2.12438	-5.55976	-2.04001	-2.433	-1.65912	-1.69219	-2.65782	-1.56718	-1.49317	-1.19888	-0.975289	-2.65942	-1.92565	-1.27193	-1.43365	-1.68752	-2.58436	0.575254	1.15062	0.14214	other_trend	0.0238528	0.0390836
NIPSNAP3A	-	-1.11821	-1.5837	-0.910985	-7.19866	-0.515108	-1.73821	-3.81795	-1.82374	-0.645444	-3.77699	-0.805232	-0.897423	-1.5823	-4.70321	-1.1269	-1.48216	-0.638828	-0.939284	-1.15099	-0.879599	-1.94086	-0.76192	-5.35376	-1.15678	-0.353015	-0.950527	-4.99117	-2.21451	-0.910844	-0.622236	-0.190135	0.0679525	-0.300422	-0.55346	-0.544081	-0.479108	-0.743754	-0.629061	-0.690848	-0.614095	-0.467701	-1.88635	0.253582	1.71075	0.0249541	linear_increasing	0.0135067	0.0242843
GART	-	-1.23122	-4.99669	-1.67762	-2.31616	-1.53724	-2.21513	-5.49707	-2.4674	-1.29766	-1.73011	-5.09308	-1.64602	-2.50096	-2.00958	-2.27775	-2.03022	-2.28748	-1.97739	-1.97308	-1.87569	-2.12358	-2.57797	-2.99367	-4.0472	-2.15	-1.88821	-5.96419	-3.22127	-2.30055	-1.21973	-1.43345	-1.31249	-1.50381	-1.71596	-1.573	-1.96249	-1.40475	-1.81574	-1.64393	-1.78736	-1.6153	-2.5708	0.206718	1.27122	0.102311	other_trend	0.0242552	0.0395743
PRPF8	-	-0.686818	-2.6069	-1.24505	-1.00737	-0.939244	-4.43455	-4.70909	-2.00898	-1.23903	-2.25152	-0.422136	-0.883183	-5.10023	-2.76426	-3.45497	-2.76269	-1.03057	-1.24751	-1.25631	-1.42193	-1.94811	-3.07744	-4.67499	-2.32771	-1.49555	-0.829612	-3.13301	-1.77241	-5.2094	-1.9145	-0.63256	-1.1486	-0.959663	-1.19297	-0.767829	-1.34761	-2.07167	-1.20465	-0.80017	-1.14847	-1.12742	-2.26184	0.402861	1.40619	0.348972	other_trend	0.0169589	0.0293648
IARS2	-	-1.31335	-1.80643	-1.51678	-1.66915	-1.07712	-2.45767	-4.92022	-2.30552	-1.87213	-1.61045	-4.13528	-1.85898	-4.03938	-5.63415	-4.54175	-2.21589	-1.56213	-1.40309	-1.82561	-1.87315	-2.11112	-2.06971	-1.83885	-2.22275	-2.26946	-1.56483	-6.69619	-2.40169	-2.39861	-1.46969	-1.75573	-0.457791	-1.24135	-1.44055	-1.49133	-2.02602	-1.39099	-1.05118	-1.87988	-1.8467	-1.45815	-2.48937	0.466564	1.38434	0.248467	other_trend	0.0273374	0.0438219
GPD1L	-	-2.07988	-1.67589	-0.849438	-5.25917	-4.39285	-0.719768	-1.4425	-3.19509	-0.969823	-1.39442	-1.65678	-3.99241	-1.18734	-5.21136	-0.958287	-1.04634	-0.111349	-1.10532	-1.1859	-0.458809	-0.778033	-1.34616	-4.0097	-1.0252	-1.21875	-0.115965	-1.54115	-1.11628	-1.35063	-0.101669	0.760354	0.32697	0.682842	0.993079	-0.0269407	0.833394	-0.452076	0.343771	0.46709	0.825275	0.475376	-1.71654	0.446565	1.44707	1.86431e-05	linear_increasing	3.58991e-05	0.000156104
SYNCRIP	-	0.318741	-0.181494	0.0457499	-0.19949	-2.70502	-3.80255	-4.66109	-0.444096	0.00783584	-0.286474	-0.203305	-0.374917	-0.415037	-0.180511	-0.454498	-5.73634	0.447104	0.100798	0.623893	-0.253085	-4.36509	-0.741225	-3.31787	-0.316018	-0.105467	-0.147878	-0.520842	-0.123069	-5.00979	0.49339	0.793992	0.800621	1.35306	0.967948	0.76913	1.09615	0.406744	0.800222	0.533602	1.07141	0.859288	-1.08359	0.276266	1.85014	0.057043	other_trend	0.00222335	0.00538168
EVPL	-	-3.53498	-3.4406	-3.78495	-4.58646	-3.61327	-4.37375	-2.58519	-3.7381	-1.51097	-0.2008	-2.35026	-1.9366	-4.63313	-3.94891	-4.01694	-1.60208	-0.451904	-2.70572	-0.921848	-0.889893	-1.45116	-0.611576	-4.80761	-1.35284	-1.1651	-1.21277	-2.92568	-1.17704	-2.21278	0.411638	2.10386	0.680287	1.84192	1.69524	1.19735	2.03687	-0.737208	1.54429	0.226238	0.804071	1.13929	-2.37771	0.905794	1.49391	3.82504e-09	linear_increasing	2.52011e-08	2.78371e-07
CD109	-	-4.36555	-5.90384	-4.39294	-2.049	-2.32057	-2.29061	-1.35572	-2.78356	-1.28274	-1.08557	-3.43064	-1.37423	-2.81389	-2.39984	-2.09541	-2.44844	-1.00966	-2.56366	-2.25636	-2.20694	-5.46476	-1.36061	-4.36687	-2.57473	-2.17711	-1.84307	-1.77158	-2.53932	-2.1253	-1.8802	-0.174801	0.664078	-0.389442	0.906725	-0.770997	0.137324	-2.04921	-1.46051	0.0607917	0.482452	-0.259359	-2.55109	0.940142	1.22718	1.57593e-05	linear_increasing	3.9733e-06	2.38647e-05
HSPA12B	-	-2.04146	-1.59976	-3.21789	-4.99736	-1.15846	-4.13095	-3.21564	-4.25945	-2.41454	-1.71799	-2.70185	-3.80681	-3.66784	-2.91056	-1.3707	-0.329087	0.22877	-1.19621	-2.21022	-0.763679	-3.66448	-0.980483	-4.20681	-2.25138	0.0941779	-0.0212127	-2.28948	-2.95208	-1.90658	-0.671597	1.64374	1.30955	0.449069	1.32026	1.31144	2.4666	-0.231085	1.63186	1.19252	1.58282	1.26768	-2.21105	0.725662	1.42546	4.20589e-07	linear_increasing	8.04859e-09	1.08939e-07
FKBP1A	-	-4.6903	-0.309302	0.390373	-0.252812	0.311912	-3.8068	-0.835479	0.317356	0.185512	0.224907	-0.177752	0.27686	-6.19182	-2.98221	-0.951366	-0.192782	1.75057	0.998218	0.986536	0.268117	-0.124102	0.280613	-2.06784	-0.661754	0.13341	0.703614	-4.66606	0.717621	-0.685917	0.424593	2.21733	1.96598	2.49244	2.18139	1.74346	2.28014	2.4566	2.24634	1.99387	2.21046	2.1788	-0.687536	0.226539	1.90508	0.000441949	linear_increasing	3.30743e-05	0.000145134
PRPF19	-	-0.894236	-1.42574	-0.884065	-1.45365	-1.42129	-3.41034	-0.687648	-1.49735	-0.638841	-0.668154	-0.898919	-1.11094	-2.46382	-5.11779	-0.551096	-5.47374	-0.878297	-1.31901	-1.32931	-2.09371	-1.76428	-1.75954	-3.07594	-0.923203	-0.770013	-1.47541	-5.36926	-3.57191	-5.65665	-0.0600606	-0.741496	-0.417036	-1.26711	-0.758265	-0.44026	-0.430165	-0.497658	-0.593466	-1.04027	-0.351825	-0.653755	-1.95481	0.300922	1.60196	0.681842	other_trend	0.0155876	0.0273601
CD81	-	0.670464	-0.993162	-0.0597547	0.237869	0.339252	-2.79968	-3.4751	-4.19141	0.00351221	-0.246093	0.338263	0.486627	-0.128988	-4.20593	-0.151887	-4.91697	0.184103	-0.998194	-0.340641	0.63718	-1.63878	-1.38362	-4.84336	0.305998	-0.256054	0.332092	-0.17358	-0.339756	-0.288374	0.695293	1.55377	1.83133	1.59615	2.01001	1.98468	1.48923	1.69289	2.09357	1.32743	2.0081	1.75872	-0.906689	0.263566	1.73544	0.00208766	linear_increasing	2.49302e-05	0.000116019
EEA1	-	-2.34706	-2.27115	-1.81292	-2.16242	-2.01452	-2.62977	-3.31812	-2.47489	-2.02645	-2.30353	-2.01366	-1.99513	-6.06345	-4.66358	-1.78333	-4.20134	-1.72185	-2.23334	-1.97227	-1.99361	-2.80936	-2.18359	-2.95511	-2.15557	-2.26103	-1.95125	-3.11891	-3.03285	-2.44401	-1.76296	-1.95808	-1.47167	-2.14532	-2.02581	-1.73717	-1.90493	-1.03823	-2.19422	-1.57432	-1.91756	-1.79673	-2.5559	0.352505	0.952981	0.141525	other_trend	0.0191886	0.0324652
ABCA3	-	-2.56354	-6.24546	-3.58759	-4.92123	-0.677304	-5.76087	-2.68468	-2.45615	-1.60045	-1.39493	-3.0471	-1.189	-6.20839	-6.06042	-1.21948	-1.90916	-0.580495	-3.59324	-2.06146	-0.589068	-3.81124	-1.12745	-3.84872	-1.76106	-0.923579	-0.930073	-2.18367	-2.80578	-2.37083	0.232009	0.464797	2.43419	0.981543	1.94808	0.124651	0.564447	0.59789	0.149677	0.221274	1.37478	0.886133	-2.59601	0.795853	1.80588	7.90123e-07	linear_increasing	8.57114e-07	6.43505e-06
TMED9	-	0.0222689	-0.145123	-0.424144	-0.770305	-0.189443	-0.932251	-1.19678	-1.10029	-0.0821875	-0.735577	-0.2565	-0.212263	-1.86998	-0.98821	-4.58319	-0.717144	0.275984	-0.226822	0.128477	-4.51415	-0.224604	-1.38518	-1.96372	-4.68926	-0.81627	-0.7659	-2.74013	-2.71326	-2.24631	0.335861	0.255788	0.184249	0.737011	0.538195	-0.814291	-0.520494	0.0494058	0.324771	0.182872	-0.0644977	0.0873009	-1.19088	0.463741	1.41503	0.628987	other_trend	0.00828657	0.0161858
DNM1L	-	-1.20888	-2.33139	-1.83636	-1.73095	-1.21592	-3.0989	-2.36119	-2.28417	-0.962631	-1.9036	-1.80008	-1.67384	-2.10276	-6.5365	-5.28615	-2.61694	-1.21351	-1.14222	-1.55186	-1.53995	-1.7965	-2.221	-2.74549	-4.90499	-3.06723	-1.13381	-3.73806	-5.80707	-2.0766	-1.19995	-0.584609	-0.839839	-0.799549	-1.03639	-0.755226	-0.945604	-1.67237	-0.744615	-0.856789	-1.02913	-0.926412	-2.43628	0.295727	1.45106	0.260023	other_trend	0.00247861	0.00588134
IFI30	-	1.75795	0.441247	-0.258659	0.70784	2.14767	-4.43682	0.831001	0.193372	1.35202	1.09866	0.686538	1.371	0.0141719	-0.579843	-3.56206	0.795035	0.639718	0.358462	3.19558	1.11558	1.87715	-2.68926	-0.86116	0.249273	-4.87605	1.58043	-3.49942	0.564292	-3.57633	1.94229	1.44148	4.10961	2.36393	2.04664	1.13828	0.515566	1.89813	2.51779	1.48074	2.46253	1.99747	-0.0473438	0.977815	2.0911	0.244329	other_trend	0.005185	0.0109512
GSTT1	-	0.387843	-5.89046	-1.15088	-3.01643	-0.0191415	-1.14658	-1.32332	-1.06868	-0.138834	-0.775304	-1.12164	-1.0121	-1.68276	-1.20662	-1.3811	-1.22104	-0.907535	-6.24781	-1.04412	0.112837	-1.18416	-4.59472	-3.42426	-2.66271	-1.02531	-4.61626	-0.986277	-1.21354	-1.51087	-0.680733	-0.237279	1.2016	0.252695	0.00500443	-1.29224	-1.69916	-0.0255801	0.152134	-0.369893	-0.379015	-0.239173	-1.72508	0.806452	1.66748	0.110228	other_trend	0.0103637	0.0195667
MAT2A	-	-0.287059	-1.0319	-0.705267	-0.834221	-0.121954	-1.29443	-1.32209	-1.41088	-0.696708	-0.951277	-1.11952	-0.966456	-2.92543	-1.60663	-2.53315	-1.11008	-1.21233	-5.79431	-0.930723	-1.07132	-0.805401	-4.57446	-4.70587	-1.26317	-1.4069	-0.811612	-2.59742	-1.37079	-1.41743	-1.0159	-0.731175	-0.35029	-0.305567	-0.757148	-0.535417	-0.888223	-0.845682	-1.09154	-0.774356	-0.0989527	-0.637836	-1.59649	0.30683	1.31765	0.731251	other_trend	0.0295113	0.0468767
GSTM3	-	-1.04407	-0.648931	-0.707395	-0.677388	-4.56894	-1.31915	-0.207594	-1.72036	-0.80899	-2.93417	-6.12	-0.568446	-0.845026	-0.380693	-0.697835	-1.47263	-0.733684	-1.13665	-0.768009	-1.19941	-6.32398	-0.285184	-4.69158	-0.00276002	0.0960067	-1.85185	-0.196756	-1.16077	0.549689	-1.23459	0.231116	0.379823	1.56318	0.8228	-0.503086	-0.410148	-0.941321	-0.552193	-0.359666	-0.535252	-0.0304744	-1.45537	0.770073	1.73897	0.0214725	linear_increasing	0.0171016	0.0295321
PSMB6	-	-5.11104	-1.4768	-1.7621	-1.84099	-3.40613	-5.95141	-1.07249	-2.20723	-1.69447	-1.50297	-1.5746	-1.92861	-1.75045	-1.4836	-1.92623	-1.90605	-1.47496	-1.80825	-2.19624	-1.40499	-1.86003	-1.70736	-5.83744	-1.49362	-1.57467	-3.71116	-1.4607	-1.01198	-1.76136	-1.67692	-1.1902	-0.85619	-1.19496	-1.44392	-0.429949	-0.984152	-0.94649	-1.45099	-1.08421	-1.7531	-1.13342	-2.18583	0.368127	1.29577	0.00584194	linear_increasing	0.01626	0.028231
LMO7	-	-4.07969	-5.00514	-1.90361	-4.00523	-3.97408	-4.57029	-2.5435	-5.0966	-2.25056	-3.04246	-2.30442	-2.63344	-3.75971	-4.70028	-1.83562	-0.241443	0.420352	-1.75108	-0.348699	-2.34353	-2.87434	0.296804	-5.52171	-0.728094	-3.01455	-0.411027	-2.66365	-1.81319	-1.35329	0.959331	2.72363	1.50554	2.45635	3.17422	2.3854	2.52149	0.727498	2.98797	2.32846	2.94929	2.37599	-2.43643	0.742848	1.75422	6.6662e-10	linear_increasing	3.74673e-10	8.00135e-09
LAMB3	-	-5.08817	-3.40351	-5.18907	-2.40278	-3.15194	-2.10656	-1.61088	-2.2031	-2.06086	-2.33468	-2.42159	-1.23266	-2.67444	-2.82917	-1.93923	-1.21465	1.20752	-1.16786	-0.791013	-0.593719	-2.15364	-0.0824421	-3.75967	-1.45749	0.0311322	-1.62038	-1.50273	-0.0396169	-0.932999	0.0381255	3.38078	2.41513	3.744	3.70603	3.48377	4.08936	2.29401	3.93426	3.00795	3.62326	3.36786	-1.82294	0.611594	1.44124	1.84364e-12	linear_increasing	2.3362e-13	1.47286e-11
ALDH3A2	-	-0.830965	1.86677	-0.145675	-0.94501	-1.57449	-0.79627	0.0607456	-3.3908	-0.273545	-0.0804039	-0.413976	0.265312	-0.46729	-4.13766	-4.20095	-0.245698	-0.12302	0.272076	-0.00121871	0.232483	-0.213671	-0.505729	-3.88907	-0.457203	-0.111926	0.0528116	-5.25725	-0.383319	-0.652695	0.524173	0.704818	0.885355	0.212779	0.610638	0.537482	1.15795	0.131712	0.730143	0.608253	0.984629	0.656376	-0.860782	0.318005	1.6308	0.124959	other_trend	0.0061809	0.0126332
CNP	-	-1.72719	-2.21647	-1.84709	-1.69132	-2.55508	-2.90995	-2.37643	-5.77003	-2.21154	-4.94993	-3.64087	-1.89598	-1.76918	-3.64278	-2.20234	-2.85982	-1.4956	-2.02977	-1.93347	-1.92092	-2.9714	-3.6038	-3.7628	-1.58831	-0.972994	-1.96515	-1.79115	-4.03072	-1.5801	-1.98391	-1.83082	-2.25452	-1.42665	-1.62012	-1.63117	-1.99908	-1.74357	-1.40673	-1.9556	-1.19727	-1.70655	-2.52987	0.317183	1.09464	0.0444577	linear_increasing	0.0253509	0.0410138
PPT1	-	-1.06171	-1.65955	-1.81256	-1.73639	-3.23013	-4.17326	-5.0929	-1.05544	-1.52786	-1.2662	-3.72943	-4.09562	-6.01476	-2.60432	-4.63189	-4.28685	-6.39135	-5.02903	-3.17614	-3.20068	-4.8873	-4.32563	-3.79582	-2.86127	-5.17981	-3.42996	-4.63149	-3.47199	-5.18042	-0.625632	-0.114406	3.93418	-1.19379	-1.80987	-0.598838	-1.55578	-4.17973	-0.464495	-0.490468	-0.79681	-0.727	-3.47218	2.00684	1.57357	0.0920279	other_trend	7.09207e-05	0.000286365
PECAM1	-	-3.22658	-4.28349	-2.90279	-4.89098	-1.37323	-5.50649	-3.41511	-1.20012	-3.54157	-1.25054	-0.775308	-1.21411	-4.25089	-4.30209	-1.90941	-0.776536	0.483208	-2.15799	-1.50546	-0.923054	-1.10972	-0.670267	-2.69133	-2.42776	-1.49359	-2.90734	-2.37085	-2.06842	-1.71131	-0.503707	1.98577	1.7171	1.66979	3.34931	1.59913	3.72193	2.00428	2.42069	2.6232	2.74122	2.38324	-2.22923	0.728902	1.44954	1.32281e-08	linear_increasing	1.03233e-11	3.48095e-10
RAB14	-	-0.213399	-0.154555	0.42183	0.333673	-0.480867	-5.17849	-0.405997	-0.790317	-0.0588777	-0.108685	-0.469635	0.23173	-5.61043	-4.07774	0.531262	-0.585422	0.474389	-0.0163047	0.346011	0.163818	-0.265961	-0.360342	-4.5013	-0.488865	-0.158403	-0.0373382	-4.09598	-0.164045	-0.204033	0.951242	0.671159	1.22412	0.548396	0.797773	0.872544	0.549738	0.0165835	0.984621	1.05957	0.799221	0.752373	-0.832434	0.336684	1.81257	0.0622738	other_trend	0.00963228	0.0183985
PHGDH	-	-0.365192	-0.424261	-0.429052	-0.915589	-1.44189	-0.726069	-5.10551	-1.64883	-1.51471	-1.12025	-2.21362	-1.0357	-1.67397	-2.46061	-1.18027	-1.7042	-0.884349	0.471589	-1.13663	-1.82688	-2.90124	-1.69395	-1.84378	-4.30564	-1.3818	-1.10416	-3.73015	-4.66453	-2.38877	-1.08789	-0.646163	-1.09163	-0.533749	-1.03171	0.462119	-0.270795	-0.370074	0.0499389	-0.734552	-0.716485	-0.488311	-1.74793	0.477644	1.29047	0.571174	other_trend	0.0047853	0.0103109
HSDL2	-	-1.07841	-1.45425	-1.50535	-6.0164	-1.41136	-1.65068	-1.87747	-1.03058	-0.831303	-1.24399	-0.961572	-1.50584	-2.56029	-3.76969	-1.30468	-0.929618	-1.12796	-0.994383	-1.34276	-1.05783	-1.16888	-2.20334	-4.49483	-1.58994	-1.89305	-2.46433	-1.38264	-1.7093	-4.68357	-0.39694	-0.122027	-0.285896	0.011268	-1.14412	-0.216911	-0.276585	-1.07737	-0.442654	-0.275717	-0.845432	-0.467545	-1.85471	0.406992	1.2775	0.055113	other_trend	0.00182703	0.00456638
STAT3	-	-0.496482	-2.03186	0.00847866	-0.673356	-0.370985	-2.25337	-1.59579	-1.34331	-0.354547	-0.363303	-0.488262	-0.421701	-1.51516	-5.08828	-0.667988	-1.34243	0.419336	-0.485127	-0.262446	-0.320178	-1.4606	-0.838416	-5.84492	-2.98255	0.0256843	-0.663273	-3.1317	-0.0745336	-4.21698	0.338063	0.70355	0.291865	0.131195	0.797911	0.691692	1.09745	0.502303	0.852352	0.815819	0.354782	0.623892	-1.2832	0.297155	1.56176	0.0812257	other_trend	0.00049877	0.00151204
DPT	-	1.21226	1.66866	1.5032	1.40581	1.9195	0.761497	-5.26234	-4.40987	2.22871	1.88522	1.94991	2.23245	2.29356	-4.01603	2.06984	-4.99354	2.91727	1.44597	1.51039	-5.30298	-0.106471	1.11779	0.464659	3.07348	1.84535	1.20237	2.05763	2.71598	2.56254	1.37086	2.81131	2.1135	3.12028	3.62412	2.95441	2.92679	2.15125	3.06899	2.19493	3.36208	2.83276	0.644123	0.52256	2.57439	0.0256692	linear_increasing	0.0117163	0.0215696
NEXN	-	-3.00239	-1.96305	-1.93434	-4.72513	-2.00267	-2.44174	-2.31765	-1.77763	-1.76075	-2.192	-1.8751	-2.1213	-2.62738	-2.208	-2.54595	-2.02467	-1.23281	-1.83155	-2.02226	-6.05937	-5.3765	-2.02599	-3.53758	-2.09942	-2.51106	-5.08765	-2.36955	-2.06725	-4.53968	-2.34519	-1.84241	-2.54407	-1.39738	-1.90099	-0.708818	-1.37526	-2.17522	-1.72275	-1.07686	-1.93986	-1.66836	-2.68752	0.539012	1.21539	0.422281	other_trend	0.014854	0.0262418
AQP1	-	-1.69267	-3.6529	-1.43158	-0.126443	-0.266196	-1.44331	-1.04455	-1.26253	-3.58836	-0.297142	-0.96416	-0.166411	0.100576	-0.451073	-0.823115	-0.637295	-5.0793	-1.09469	-0.0964568	-0.684541	-0.965647	-4.91881	-5.27793	-0.569277	-0.19034	0.252112	-0.973868	-2.36816	0.444663	0.369586	0.90116	-0.448725	-0.00108591	0.771813	0.213555	1.19239	0.00268408	-0.424476	1.46403	0.503626	0.417496	-1.29666	0.659183	1.6153	0.00803012	linear_increasing	0.00245939	0.00584295
APPL1	-	-1.20956	-1.33426	-1.42316	-1.79513	-1.25704	-1.48624	-2.12379	-2.21852	-1.66248	-6.41279	-1.64261	-1.36356	-2.24455	-2.24039	-1.24981	-5.61462	-1.07844	-0.907168	-1.37203	-1.43582	-1.42787	-2.22477	-1.81517	-3.11096	-1.3379	-1.00194	-4.51285	-1.38793	-4.79752	-1.22401	-0.354601	-0.81008	-0.563414	-0.573243	-0.613471	-1.24135	-1.01497	-0.700299	-1.18976	-0.932929	-0.799411	-2.0971	0.290819	1.40023	0.175453	other_trend	0.00639872	0.0129593
COMT	-	-1.71264	-0.793108	0.09567	-0.902915	-0.000223124	-1.09033	-0.685205	-0.213037	0.027376	-0.873991	-0.209126	0.0280463	-3.19202	-2.19597	-5.11656	-4.8349	0.325142	-0.364689	-0.278734	-1.45388	-1.5397	-1.29423	-4.61216	-1.52286	-0.980769	-4.54771	-0.764324	-1.05404	-1.98447	0.405433	1.08907	2.36927	0.963433	1.12178	0.829087	1.57723	0.998712	1.12765	0.884757	2.16372	1.31247	-1.37786	0.544554	1.57589	0.0275882	linear_increasing	5.96427e-06	3.45281e-05
DYNLL2	-	1.07644	0.988274	0.893775	0.63499	1.03846	1.74978	0.190032	0.69108	1.14928	0.660782	-0.685099	0.642905	-0.35319	-3.17272	-6.50846	0.273195	0.258714	0.696299	-0.652113	0.193572	0.431791	0.169055	0.363675	-4.27627	-0.276887	0.597557	-5.14909	-0.879497	-4.62365	0.572451	2.05428	1.49107	2.22407	2.0009	1.70977	2.17526	0.397638	2.62778	1.71926	2.00688	1.84069	-0.443495	0.597575	2.08799	0.634846	other_trend	0.00165698	0.00421259
NCEH1	-	-1.41817	-2.70577	-3.3653	-2.61228	-1.6109	-2.74568	-2.29029	-2.52963	-1.83402	-2.32331	-1.28738	-2.01866	-5.22495	-2.51099	-1.70527	-1.49427	-4.11689	-2.57359	-0.892432	-2.31075	-1.78998	-1.59568	-5.5311	-2.76572	-2.72042	-1.92582	-8.52443	-2.63923	-2.85719	-1.11513	-1.12171	0.37835	-1.01759	-1.58795	-1.59038	-1.94081	-1.60279	-1.74126	-1.57074	-1.61329	-1.34082	-2.63451	0.662273	1.53274	0.209342	other_trend	0.0141279	0.0251335
RAC1	-	2.42456	0.20308	2.3345	-2.20666	2.52033	1.21494	0.74126	0.470762	2.34693	1.63959	1.04009	2.112	-4.7098	0.547192	0.673946	0.996788	2.19582	1.74496	1.97219	2.39055	1.50543	1.18794	-3.9835	1.09383	-5.68744	2.51392	0.756757	1.05737	-2.72415	2.28207	3.22201	2.70499	3.05825	2.50067	2.52087	2.4746	2.10633	2.729	2.81384	2.83344	2.6964	0.621842	0.317528	2.21363	0.223759	other_trend	0.00572711	0.0118514
ACOT9	-	-0.46694	-1.01723	-1.44544	-1.29597	-0.41275	-3.29107	-3.46046	-5.8292	-1.01719	-0.718221	-2.15395	-0.312921	-3.98772	-4.15539	-3.90612	-2.16349	-0.786633	-0.807471	-1.26202	-1.533	-1.37952	-1.80173	-2.8597	-3.59885	-1.64433	-1.14845	-5.25749	-2.85474	-2.66782	-0.402615	-0.0182295	0.493367	0.526312	0.839	-0.309579	0.150169	-0.473676	0.0468428	-0.0515208	0.663814	0.18665	-2.12128	0.430057	1.4967	0.0209669	linear_increasing	2.6887e-05	0.00012304
RPS12	-	1.48368	1.35062	0.971284	0.88874	1.73812	0.263752	-3.37509	0.295436	0.980222	1.22252	-0.183319	1.3436	0.439941	-3.19769	-0.29199	-3.47987	1.30353	1.2185	1.30006	0.385976	0.391828	-0.255433	-0.271496	-0.179267	-0.205676	0.567272	-0.0368028	-3.35267	-1.74762	1.00683	1.97174	1.58945	1.48725	1.41939	1.90911	1.69175	1.99068	1.78351	1.7114	1.66671	1.7221	0.0191658	0.194846	1.53405	0.331743	other_trend	0.00130668	0.00342625
BAG3	-	-2.70419	-2.29592	-2.17513	-1.9893	-1.20137	-2.09735	-2.19038	-2.0835	-2.02319	-1.96438	-2.13657	-2.06008	-5.56281	-4.99053	-2.10596	-2.68344	-1.39962	-2.10321	-1.66275	-2.36799	-1.97025	-1.88249	-4.80119	-2.27912	-2.45189	-1.62168	-4.22188	-1.76333	-5.98059	-2.04254	-1.79351	-2.4659	-1.74422	-1.87673	-1.05709	-1.14614	-1.70421	-1.4565	-1.3088	-1.78047	-1.63336	-2.56042	0.41137	1.22852	0.596068	other_trend	0.0254801	0.041119
RAB10	-	-1.73632	-1.60988	-1.11563	-0.937459	-4.58699	-1.56588	-0.842599	-1.29918	-0.855158	-1.07744	-0.681049	-0.751493	-6.28276	-1.45027	-1.19415	0.133731	-0.988267	-0.9377	-0.391807	-1.2288	-0.897798	-1.34378	-1.15853	-0.745079	-1.34682	-5.15958	-1.10552	-0.710145	-0.837399	-0.0704883	-0.156929	0.252168	-0.789837	-0.703467	-0.153808	0.0701402	-0.821147	-0.225439	-0.310811	-0.213585	-0.305271	-1.42581	0.360697	1.40774	0.0214062	linear_increasing	0.0181027	0.0309549
ADK	-	-1.53135	-2.3926	-1.14095	-5.02836	-2.67355	-1.74296	-1.22087	-1.30803	-0.613737	-1.27797	-1.12811	-0.705753	-0.836033	-1.36172	-1.19794	-0.97088	-1.13578	-2.1584	-0.994528	-1.87992	-1.20096	-5.58805	-4.67413	-1.07037	-0.590922	-4.60284	-0.738586	-1.27676	-1.33375	-0.563304	-0.658125	1.06021	-0.809427	-0.306655	-1.81076	-1.00548	-1.05674	-0.023492	-0.366526	-0.286524	-0.526352	-1.76464	0.757146	1.38062	0.0382882	linear_increasing	0.0105827	0.0199021
CLIC2	-	-2.21644	-4.37905	-3.38188	-2.9385	-2.79115	-2.85606	-1.28692	-4.46671	-1.41413	-4.11681	-1.14631	-1.20443	-2.71599	-2.49693	-1.87782	-2.67304	0.0871963	-1.96879	-0.789608	-2.44392	-1.85216	-2.7398	-4.38246	-1.31701	-0.249486	-2.72514	-1.47746	-0.876172	-0.830796	-0.0680118	1.82547	0.978194	1.63394	2.09662	1.32864	2.06356	0.242213	2.08815	1.23242	2.36091	1.58501	-2.11986	0.647003	1.26475	1.92362e-09	linear_increasing	9.58832e-11	2.33275e-09
RDX	-	-2.72806	-3.10831	-3.28215	-4.4986	-2.77158	-3.50396	-2.98286	-2.52892	-3.41111	-1.7183	-2.01856	-2.78715	-4.29377	-3.00256	-1.23159	-1.36143	0.504365	-1.57343	-0.965193	-4.45772	-0.659576	-1.47041	-5.22823	-0.92868	-0.571375	-1.17006	-1.46895	-0.90646	-0.990791	-0.320014	2.22744	0.811917	1.55091	1.98101	0.383634	2.22581	0.689618	2.08731	2.30367	2.13001	1.63913	-2.18118	0.734887	1.41395	1.65959e-09	linear_increasing	7.56173e-10	1.45336e-08
COL8A1	-	-2.33718	-0.118434	-0.412501	-0.0191337	-1.4968	-0.879147	-0.703598	-4.39849	-0.0745299	-1.21091	-0.822738	-0.879864	-0.23369	-0.736843	-0.56269	-0.455652	0.526435	0.053719	-1.00264	-2.62628	-1.22749	-0.585303	1.19745	-0.185952	-0.22442	-0.821657	-1.19803	-3.78124	-2.68719	0.0861562	0.172741	-0.702424	0.762931	0.484754	1.06329	0.337776	-0.622298	-0.188213	0.433228	0.353609	0.209539	-0.927288	0.565813	1.20256	0.0706747	other_trend	0.00672822	0.013541
NAPA	-	-0.813311	-1.06339	-0.939817	-0.998617	-1.33733	-0.443915	-0.480986	-5.98102	-0.730497	-0.909247	-0.156238	-0.582262	-1.25512	-7.09541	-0.468347	-0.282258	-0.922486	-0.534381	-0.677869	-0.760085	-0.45139	-0.558246	-4.56075	-0.560131	-0.610604	-4.27042	-0.933995	-0.819035	-0.878964	-0.675362	0.130783	0.314264	0	-0.0116639	-0.0882305	-0.185142	-0.316328	0.293135	-0.276278	-0.475757	-0.0615219	-1.35838	0.260103	1.71639	0.105917	other_trend	0.0234983	0.0386015
DEFA3	-	-2.14817	2.00062	2.59826	1.13485	0.187554	-3.28405	-2.66492	-3.26985	0.679953	-2.27652	-2.69883	0.968127	-0.911144	-3.09152	-2.7702	-3.28047	2.49788	-0.214848	0.117007	-3.73892	-2.19632	-3.41156	-2.50585	-2.71212	-3.26411	-3.79349	-4.91449	-3.69975	-2.74853	3.61249	6.38774	6.1774	4.68896	6.34608	5.98213	6.64932	5.94313	7.06233	5.79492	7.00304	6.20351	-1.52663	0.68379	2.2887	0.000592646	linear_increasing	1.00541e-12	5.08524e-11
GLS	-	-0.859561	-2.55551	-1.92069	-3.76116	-1.73407	-4.46232	-4.24931	-3.1812	-0.877091	-1.10397	-1.14837	-1.00624	-2.73725	-3.87592	-2.58361	-1.8046	-0.684429	-2.10863	-0.163328	-1.83452	-0.876262	-3.55915	-3.56546	-2.42979	-0.949751	-1.75182	-3.25417	-3.16314	-1.32268	0.0631945	-0.618179	0.412546	1.00971	-0.465779	-0.734925	-0.115714	-1.86351	-0.432696	-0.703821	-0.221672	-0.373405	-2.11536	0.756631	1.25124	0.000908256	linear_increasing	0.000188254	0.000661469
SF3B3	-	-0.507894	-1.58757	-1.15331	-1.69515	-1.76175	-1.48	-1.81911	-1.6318	-1.12104	-1.55506	-1.91547	-1.11266	-1.51023	-1.94942	-1.91333	-1.68273	-1.27153	-1.24899	-1.13062	-1.13769	-1.88937	-6.59085	-3.97225	-2.15541	-3.51779	-1.53635	-5.56982	-1.3128	-2.71628	-1.46365	-0.788625	-0.437566	-1.35241	-1.17564	-0.833578	-1.54286	-1.15951	-1.1073	-0.917583	-1.1233	-1.04384	-1.997	0.312371	1.31239	0.880482	other_trend	0.0298355	0.0472745
FARP1	-	-2.3121	-2.44798	-1.43285	-2.4267	-2.14989	-2.30748	-5.23475	-1.63818	-2.26507	-1.76841	-1.65538	-2.03615	-3.34978	-4.36559	-2.43064	-3.13961	-1.21154	-1.89925	-2.57306	-1.99335	-2.55345	-2.02656	-4.66755	-2.03376	-2.42882	-1.97478	-5.37901	-2.10116	-2.59416	-1.756	-0.765069	-1.05889	-1.32662	-0.922312	-0.905584	-0.654152	-2.89157	-1.12788	-1.39402	-0.673581	-1.17197	-2.53843	0.654926	1.05653	0.0367627	linear_increasing	0.000462679	0.00142511
EHD4	-	0.886935	-1.13334	0.648211	-0.396745	0.532255	-0.424926	-1.70915	-2.27813	0.280447	-0.0117384	-5.60858	0.857969	-1.31077	0.221037	-0.442555	0.576067	1.3079	0.991299	0.509198	-0.133795	-0.318045	0.0401398	-5.28105	-0.546765	-0.392412	0.715506	-4.3927	0.037299	-0.346607	1.09015	3.14613	2.77477	2.43009	2.85631	2.48572	3.56476	2.1554	2.90792	2.9548	3.51933	2.87952	-0.53443	0.453306	1.75925	0.000922223	linear_increasing	5.31462e-07	4.31e-06
NIBAN1	-	-1.25603	-1.13303	-0.981752	-1.35237	-1.39185	-3.58162	-2.50442	-2.31711	-1.23139	-1.02922	-1.80769	-0.793945	-1.96923	-5.84193	-1.26291	-1.61355	-0.774859	-0.877838	-1.2528	-0.959143	-1.55223	-1.67848	-4.4525	-4.15543	-1.03631	-1.0753	-3.50486	-1.83536	-1.5117	-0.865257	-0.661948	-0.907513	-0.581852	-0.599838	0.442494	-0.400437	-0.540161	-0.973329	-1.07698	-1.50082	-0.680039	-1.85334	0.510254	1.24276	0.106316	other_trend	0.00641372	0.012976
CDH13	-	-1.93607	-0.374495	-0.958553	-0.947536	-1.02837	-1.95086	-3.52054	-1.33215	-1.29874	-1.45184	-1.74168	-1.5909	-1.55795	-1.39973	-1.94228	-0.810917	-0.853831	-1.33351	-2.0548	-6.75886	-1.62968	-0.387848	-4.39508	-2.41871	-2.46314	-1.45822	-4.21342	-1.66422	-2.3139	-2.03951	0.0686743	0.597648	0.461694	0.780891	1.50382	0.118383	0.0919861	1.36681	0.858203	0.374711	0.622282	-1.92758	0.51007	1.31386	0.0271407	linear_increasing	6.74041e-07	5.28779e-06
PAFAH1B1	-	-1.66891	-1.53887	-1.49262	-1.92575	-1.62818	-2.055	-2.16063	-3.94001	-1.81126	-1.40898	-1.52536	-1.67413	-3.18552	-2.08695	-1.93929	-5.53723	-1.08516	-1.7527	-2.53496	-2.17208	-2.23545	-1.41776	-4.14998	-1.56624	-1.74474	-1.5915	-1.7728	-1.51196	-1.74091	-0.994946	-0.862228	-1.44626	-1.38065	-1.2478	-0.971538	-0.900975	-0.585718	-1.16038	-1.1883	-1.20002	-1.09439	-2.06166	0.262208	0.96606	0.0348554	linear_increasing	0.00360079	0.00807551
TAPBP	-	-0.439062	-0.630624	-1.13155	-0.968759	-0.803418	-5.18174	-4.86799	-1.40114	-1.39068	-1.35119	-1.3412	-0.227256	-2.12423	-2.05612	-2.09532	-1.17134	-1.5411	-1.56153	-0.53157	-1.28192	-1.3904	-1.02488	-3.46419	-4.10777	-1.82846	-1.40328	-1.67688	-1.46458	-2.04098	-0.10505	-0.0970722	-1.30679	-0.890353	0.0651755	-0.680193	0.36411	-0.864105	-0.210337	-0.640364	-0.2034	-0.446333	-1.68681	0.51203	1.22843	0.0637747	other_trend	0.00379901	0.00847893
LIMA1	-	-0.795013	-4.2349	-0.87715	-1.07419	-0.608936	-1.25	-0.754123	-1.64486	-1.10287	-0.807513	-0.812364	-0.706877	-4.40251	-3.65657	-1.24412	-1.59721	-0.556807	-1.03401	-0.791101	-0.852394	-2.07457	-1.37191	-6.20339	-2.41471	-0.939142	-0.654048	-1.56122	-0.699191	-1.43802	-0.0492734	-0.103334	-1.11764	-0.642186	-0.188581	-0.9834	0.01655	-0.414963	-0.377273	-0.672713	-0.902124	-0.538566	-1.5403	0.388083	1.36379	0.0903677	other_trend	0.0286835	0.0457508
HK3	-	-1.03533	-1.22918	-1.659	-0.846042	-0.458756	-3.1813	-1.6363	-1.29681	-0.193265	-1.47438	-0.708556	-0.600542	-4.67986	-5.20739	-1.52555	-1.7419	-2.2938	-1.6165	0.452493	-1.17622	-0.0458119	-2.37391	-5.26896	-2.84596	-1.59288	-0.655667	-1.83536	-1.89212	-4.20716	0.735513	0.22502	1.99605	-0.764964	-0.426036	-1.78761	-1.20941	-1.16314	0.669889	-0.338106	-0.398641	-0.319694	-1.73635	1.08077	1.51846	0.183488	other_trend	0.0098193	0.0186586
SUCLG2	-	0.0910349	-0.534716	-0.431864	-0.57939	0.000223124	-0.248697	-4.78246	-0.742939	-0.398557	-0.684756	-1.1177	-0.458285	-4.93551	-1.01404	-0.356196	-0.798948	-0.595051	-0.589254	-0.614943	-0.354873	-0.59383	-0.927506	-4.89511	-0.788222	-0.83187	-0.707248	-2.84288	-0.830099	-0.529248	-0.254159	0.188982	0.676149	0.394177	0.13971	-0.258011	-0.269298	-0.244549	0.370297	0.130715	-0.0860388	0.104213	-1.07824	0.319667	1.37682	0.135471	other_trend	0.0110965	0.020698
CTSH	-	0.193318	-3.1625	-0.0619314	-1.54053	0.680072	-4.38261	-1.73365	-0.849353	0.394898	-0.127331	-0.012177	0.181457	-1.22152	-5.15	0.272517	-2.08688	0.336849	-0.552214	0.399753	0.41204	0.0403161	-1.24622	-5.61111	-2.15503	-2.37942	-0.524801	-2.02792	-1.43935	-1.14615	0.836197	-0.17081	2.43328	1.97721	0.369866	1.32718	0.561205	0.0335255	0.999229	0.122804	0.309729	0.796322	-1.12211	0.871899	1.69435	0.0294974	linear_increasing	0.00154351	0.00394497
ELANE	-	-5.60497	1.07463	2.16431	1.40639	0.0127115	-1.1403	0.256049	-5.70864	0.871744	0.108032	0.490791	1.04914	-0.93908	-0.0431779	-0.301886	0.00395387	0.968305	-0.245799	1.262	-3.79139	0.836433	0.270882	-0.321474	-0.247857	-0.249021	-1.34773	-0.146356	0.925262	-0.35329	3.47834	3.73471	2.69446	-0.0743254	3.59182	2.59062	4.21002	2.9771	4.31122	2.89332	4.47714	3.14061	-0.175399	1.32422	1.9319	0.000257727	linear_increasing	1.22075e-05	6.23663e-05
HNRNPH2	-	-0.277022	-0.848967	0.15694	-0.504059	-1.00221	-1.3801	-6.58546	-0.249371	0.116031	-0.545887	-0.276408	-0.198335	-4.40639	-2.73179	-0.657786	-1.76442	0.0150998	-0.517431	0.0711628	-1.07938	-0.776721	-1.38729	-1.99397	-0.515791	-0.603925	-1.5733	-1.24955	-0.409404	-0.875142	-0.0455873	0.904599	0.580039	0.292049	0.426623	0.375851	0.345848	-0.627823	0.471862	0.0439636	0.133842	0.294685	-1.06988	0.401551	1.40778	0.0260455	linear_increasing	0.00473344	0.0102106
AGRN	-	-0.822024	-1.88417	-2.26082	-1.84466	-0.571612	-4.21916	-3.04209	-0.993109	-0.246699	-1.6943	-1.2273	-1.23291	-2.51902	-4.57874	-1.02965	-0.884343	0.0902853	-0.288675	-0.88848	-0.569929	-0.351815	-0.746781	-4.38837	-1.02257	-0.789013	-0.51876	-1.24699	-0.958257	-4.36249	0.551917	2.8756	2.57336	3.96193	4.03756	2.55541	3.11913	1.70051	3.30948	2.18769	3.84817	3.01688	-1.48468	0.786839	1.37692	4.39171e-06	linear_increasing	6.56591e-12	2.33698e-10
HLA-B	-	2.01983	1.73379	1.26927	1.83478	0.793808	-0.283369	0.212871	0.864866	0.766798	-1.05517	0.719244	1.65157	-5.05634	-1.30472	0.67768	1.81149	1.12404	-0.25606	2.01276	1.07382	1.24218	1.55494	0.178882	-1.31482	-5.13507	1.26493	0.524343	0.57824	0.815938	2.19597	1.78585	2.80343	2.05784	2.08365	1.11708	3.23627	2.04037	2.14234	3.17991	3.01047	2.34572	0.417215	0.687144	1.76774	0.111361	other_trend	0.00187385	0.00465345
TRIM25	-	-0.951015	-0.978971	-0.900137	-1.79658	-1.42156	-1.25068	-2.25653	-1.67303	-0.521647	-1.18672	-1.84368	-1.11978	-1.74952	-5.44905	-5.32052	-1.01498	-0.846582	-1.99116	-0.806023	-1.26444	-1.14172	-1.90032	-3.51165	-2.17216	-1.83417	-1.55216	-2.1819	-1.70059	-2.02223	-1.2272	-0.397171	-0.281766	-0.365618	-0.531599	-1.05217	-1.41602	-0.946597	-0.532849	-0.700708	-0.598032	-0.682253	-1.78622	0.355825	1.1447	0.228897	other_trend	0.00501673	0.0106779
CYB5A	-	1.86126	0.363968	1.44042	1.067	1.58274	1.34799	0.29289	-6.37835	2.23163	1.99774	1.67655	1.7296	0.99947	1.18955	1.14796	1.1706	1.74688	1.58806	2.03622	1.73667	2.00928	1.44376	-4.24845	1.53239	1.56306	1.92654	-5.06097	0.811221	1.34796	2.42713	2.88345	3.68287	2.85034	3.1573	2.64655	2.87187	2.09851	2.9678	2.77617	2.93227	2.88671	0.819359	0.395594	2.12559	0.0429362	linear_increasing	0.00435129	0.00948207
ADIRF	-	1.04987	1.51533	1.08914	0.00443552	0.929509	0.69291	-5.19179	0.133252	0.472544	1.13536	0.0810133	0.773705	-5.58021	-0.29913	0.787552	1.46627	1.28298	0.778244	0.136904	0.391992	0.693906	0.331728	-4.83747	0.483372	0.131548	0.72456	-0.0596091	-0.238183	0.818724	0.228252	2.26794	1.77075	2.31873	2.67549	2.95069	2.3232	1.60591	3.1569	3.20916	3.10151	2.53803	-0.00244284	0.57396	1.82882	0.0181979	linear_increasing	0.000118459	0.000439855
POR	-	-0.98554	-0.96753	0.288254	-0.252349	-0.130613	-2.84461	-1.05125	-4.77144	-0.0626601	0.0420916	-0.114294	0.270065	-1.21951	-2.36526	-0.202845	-4.48056	0.0360769	-0.144045	0.506663	-0.42483	0.49844	-0.367732	-3.66622	-0.358559	0.0582337	-0.417943	-0.263292	-0.185198	-0.173253	0.827414	0.620821	2.00153	1.57253	0.223494	0.306084	0.20624	0.238707	0.839023	-0.127699	0.178872	0.60596	-0.764076	0.682148	1.429	0.00523977	linear_increasing	0.00609769	0.0124811
CLIC4	-	-2.76791	-5.12901	-4.64045	-0.843165	-0.161446	-4.6592	-1.29748	-1.49009	-0.685177	-0.442848	0.220368	-0.646496	-1.53981	-1.07284	-0.54651	-0.387908	0.562971	-0.837328	-0.394807	-1.57424	-0.889192	-1.91736	-2.97472	-1.03587	0.306427	-1.72124	-1.01327	-1.83974	-1.20346	0.206869	1.50618	0.991604	1.77597	1.76565	2.12961	1.12621	1.7577	2.34195	1.14332	1.72573	1.62639	-1.34716	0.439075	1.43249	1.75691e-07	linear_increasing	1.53947e-07	1.41572e-06
CORO1B	-	-0.109861	-0.3572	-0.272204	-0.374483	-0.0913106	0.346539	-0.465152	-0.687177	0.166398	-0.146222	-0.00589788	-0.0392312	-0.688815	-3.73549	-0.0320513	-0.311242	-0.163236	0.0399232	0.262061	-0.709637	-0.246016	-0.68421	-4.94048	-0.65562	-0.355734	-0.151664	-5.05871	-0.285395	-0.452928	0.0939917	0.0262533	0.933481	0.584658	0.159894	0.537747	-0.28283	-0.0315173	0.620723	0.337875	0.278778	0.316506	-0.670369	0.362865	1.36797	0.501791	other_trend	0.0312122	0.0490112
NES	-	-1.5466	-1.65542	-5.56553	-2.05137	-0.564335	-2.43711	-1.23578	-0.63709	-0.319156	-1.90745	0.450068	-2.52489	-2.26423	-2.66252	-2.13157	-1.42814	-0.400835	-1.22453	-1.13976	-0.0724383	-1.11754	0.389236	-3.56645	-1.5007	-0.701493	-0.0971397	-1.73865	-1.35902	-2.28733	-0.0109779	-0.0258987	-0.749027	0.797955	0.557374	0.0389799	0.31162	-0.554557	1.71613	-0.0534447	-0.0187077	0.202043	-1.44363	0.703593	1.24626	0.00048521	linear_increasing	0.000328533	0.00106482
SCFD1	-	-0.461553	-0.891663	-2.89341	-0.952695	-1.00619	-1.7693	-1.45888	-1.681	-1.20076	-4.68659	-1.37385	-0.697997	-1.27824	-1.29687	-1.91454	-1.52144	-1.15773	-1.12163	-0.881262	-1.27299	-0.94906	-1.53181	-3.24027	-0.971048	-1.42404	-1.31061	-1.15964	-1.42459	-1.42791	-0.868893	-1.12338	-0.806917	-0.299719	-0.460235	-0.785064	-1.43476	-1.18792	-0.471137	-0.857209	-1.06306	-0.848939	-1.46088	0.362191	0.83117	0.057795	other_trend	0.0308146	0.0484866
GDI1	-	0.196126	-0.285296	-0.311933	-0.621121	-0.0406554	-1.3445	-1.22509	-0.337721	-0.169465	0.185231	-0.761663	0.326378	-0.781536	-4.31327	-0.874317	0.209342	-0.442099	-5.35515	-0.783217	-0.619323	-5.17107	-0.0355229	-0.979372	-0.273887	-0.456667	-0.148759	-1.83267	-0.148011	-1.25477	-0.359512	1.10624	0.222272	0.827938	0.629893	0.819023	0.000502609	-0.102273	0.724843	0.300422	-0.0850209	0.444384	-0.93365	0.432665	1.45755	0.194312	other_trend	0.00579419	0.0119234
FIS1	-	-1.75758	-2.4153	-1.98204	-2.26211	-1.87963	-2.90146	-2.26719	-2.54231	-1.978	-3.85743	-1.78996	-2.27627	-2.62215	-2.65687	-2.24052	-2.59289	-1.67008	-1.91533	-1.86414	-2.32883	-2.51989	-2.49574	-7.34337	-2.22696	-3.9688	-5.636	-2.34748	-2.41997	-2.05784	-1.59806	-1.44003	-1.6675	-1.72322	-1.69693	-1.81792	-1.48842	-2.3547	-1.41025	-1.38394	-1.39114	-1.63741	-2.61381	0.297502	1.20215	0.353271	other_trend	0.0159659	0.0278462
SNRNP200	-	0.0855483	-0.89184	-0.477114	-1.14619	-0.516171	-1.47468	-1.82861	-1.26169	-0.438729	-0.715309	-1.32647	-0.466607	-1.86026	-4.17127	-1.40974	-1.45038	-0.519793	-1.00398	-0.474523	-0.640928	-1.71361	-0.765603	-1.70073	-1.61123	-1.45607	-0.802695	-2.72154	-5.5779	-0.46937	-0.631227	0.202326	-0.405755	-0.452386	-0.34969	-0.562419	-0.460925	-0.902929	-0.256338	-0.551355	-0.783641	-0.452311	-1.31462	0.300832	1.14973	0.690199	other_trend	0.0254158	0.0410497
CBR1	-	2.21697	0.689277	1.64374	1.25833	2.01571	0.918293	0.118659	1.23817	1.61917	1.63267	1.54389	1.05831	0.683696	1.12788	-3.93351	-0.276714	1.14399	1.76272	2.05222	1.75042	1.38328	0.64625	1.37455	2.13055	0.649893	1.20068	-3.8723	1.70882	-2.20947	0.776327	1.50523	3.19344	2.18327	2.29438	2.87531	2.3996	1.71536	1.66547	2.66109	2.39106	2.28842	0.801749	0.544286	1.53846	0.398917	other_trend	0.00510787	0.0108479
SULT1A1	-	0.977256	-2.32935	-0.626803	-4.5103	1.2479	-0.0296653	0.886257	-0.659359	-0.872959	-0.0567065	0.363455	0.293037	0.790283	-0.137129	1.03633	-0.400077	1.41475	0.10229	-1.13329	1.45851	-1.48478	-0.369709	-2.87606	0.278638	1.00844	0.807142	0.729906	0.954125	1.00948	-5.41432	2.43121	1.54356	2.01183	1.23249	1.59375	1.49182	1.02007	2.88177	1.4841	2.29022	1.79808	-0.251423	0.585685	1.66525	0.0127475	linear_increasing	0.000529459	0.00160003
DNAJA1	-	-5.34058	-1.71554	-1.89307	-2.26572	-1.57158	-1.881	-2.71031	-2.91981	-2.42017	-2.14066	-2.0907	-1.87391	-2.68165	-2.777	-3.09776	-4.59798	-1.68297	-1.73058	-1.79866	-2.48674	-4.90235	-2.64636	-3.1635	-2.58237	-2.93784	-2.22949	-2.75899	-2.20244	-3.12218	-1.58815	-1.03186	-1.76651	-1.92882	-1.5586	-1.3297	-1.51242	-1.36358	-1.30051	-1.48673	-1.78898	-1.50677	-2.59367	0.268389	0.937786	0.0214578	linear_increasing	0.000938173	0.00259449
EIF3I	-	-1.25273	-1.02498	-1.17106	-1.92784	-4.68251	-2.21072	-1.69886	-1.61416	-1.31177	-0.749912	-1.2701	-1.34661	-1.85344	-1.6035	-1.72745	-1.5879	-0.813357	-1.50337	-0.960444	-2.01008	-1.78346	-1.28436	-2.42153	-4.32837	-1.17772	-1.37051	-2.04996	-1.51196	-1.39416	-1.30425	-1.01614	-1.2107	-1.2056	-0.974796	-0.999069	-0.741318	-0.931253	-1.52194	-1.13169	-0.841774	-1.05743	-1.69824	0.221367	0.859551	0.115219	other_trend	0.0262066	0.0422205
LMCD1	-	-1.74702	-0.631955	-0.568854	-0.651304	-3.51165	-0.744662	-1.9647	-0.210708	0.395942	0.382502	-0.784655	0.192302	-1.10672	-5.13943	-2.20571	-0.211903	1.19987	-0.373893	-0.73232	-1.76648	-2.01102	0.41833	-3.38471	-1.63244	-1.05224	-1.00992	-4.59958	-2.67076	-6.78464	0.190507	2.09131	1.0015	3.01368	2.5549	3.04059	3.02595	1.19806	2.0716	2.51244	2.9156	2.34256	-1.42393	0.74921	1.79777	0.0151453	linear_increasing	1.62332e-07	1.47868e-06
HEXB	-	-0.73397	-1.05911	-1.0473	-0.521097	-2.04876	-0.841837	-0.765379	-0.18747	0.0699785	0.181372	-0.510344	-0.6992	-0.97318	-5.30852	-0.565587	-1.05844	-0.657825	-1.44634	0.350756	-0.802124	-0.690107	-1.24008	-1.71112	-0.703053	-0.421244	-0.569474	-3.71575	-1.41755	-0.974509	-0.0416406	-0.0994725	2.3904	-0.0934599	-0.275219	-0.566684	-0.810359	-0.261088	0.0747534	-0.152809	-0.281268	-0.00752032	-1.00363	0.879511	1.10935	0.128423	other_trend	0.0140442	0.0250864
CRK	-	-2.47607	-2.00379	-1.32409	-1.82537	-1.94286	-2.05508	-1.73747	-1.81287	-1.3115	-0.84443	-1.69323	-1.3149	-2.19983	-1.74631	-1.63111	-0.584725	-0.88529	-1.86797	-1.11877	-1.24182	-1.6655	-1.25016	-4.59005	-1.83402	-1.61266	-2.87003	-2.06198	-1.54038	-1.75784	-1.17096	-0.335043	-0.653316	-0.316055	-0.482123	-0.0101921	-0.192151	-0.998098	-0.750588	-0.342216	-0.91405	-0.499383	-1.73237	0.320898	0.723526	0.0015304	linear_increasing	7.40821e-06	4.11519e-05
LAMA3	-	-2.09133	-2.005	-2.97926	-5.59641	-1.15426	-5.17367	-0.560812	-2.73895	-1.41615	-1.26395	-1.22037	-1.2103	-1.91156	-2.3101	-0.426725	0.40688	2.15876	-1.00678	-1.08985	-0.13238	-0.357794	0.773295	-4.36503	-0.655554	0.493268	-0.774912	-0.263913	0.779746	-0.0124967	1.41838	3.9234	3.30101	4.615	4.49687	4.0504	4.7887	3.08709	4.598	3.40626	4.71602	4.09828	-1.15624	0.641507	1.7706	1.12516e-10	linear_increasing	4.1488e-11	1.13714e-09
EIF4H	-	-0.476262	-0.278907	0.15075	-0.605154	-0.680161	-0.124365	0.0152249	-0.556113	0.287442	0.29239	-0.498791	0.239605	-1.2715	-1.60618	-0.667919	-0.206232	0.898468	-0.16966	0.383346	-0.329526	-0.586663	-0.609693	-4.83784	-0.220096	-0.401214	-3.23428	0.0147483	-0.535247	-0.267386	0.0799661	0.264165	0.237715	0.691464	0.580322	0.548873	0.27861	-0.353746	0.568624	0.0856987	0.513404	0.341513	-0.526709	0.311477	1.09174	0.308916	other_trend	0.0184585	0.0314236
BCAM	-	-3.62098	-2.8804	-1.98925	-4.64908	-1.22377	-1.11369	-1.15854	-3.31221	-4.17569	-0.994078	-2.03559	-1.65627	-3.61445	-2.9237	-0.624848	-0.643293	0.573933	-1.51355	-0.638773	-1.14705	-1.05536	-0.0498926	-5.97676	-1.08448	-0.229144	-1.68286	-1.44414	-0.0217486	-0.642265	0.518984	3.66896	2.88843	3.83681	4.03419	2.864	3.7187	2.09772	3.91013	2.9093	3.94428	3.38725	-1.7003	0.650424	1.56512	2.23486e-09	linear_increasing	4.17552e-12	1.63783e-10
AGL	-	-1.53751	-1.90448	-1.68578	-1.82368	-1.87002	-1.89527	-2.00211	-1.78604	-1.36852	-1.3647	-1.81367	-1.70422	-2.51878	-2.38019	-1.951	-2.71432	-1.64682	-1.51234	-1.98662	-1.63648	-2.27179	-1.90005	-3.56468	-1.38641	-2.01021	-1.69622	-2.08412	-1.83773	-2.08516	-0.796862	-1.44781	-1.50041	-1.61004	-1.22068	-0.617497	-1.45323	-1.47094	-0.989249	-1.52958	-1.70399	-1.35434	-1.89119	0.327599	0.488004	0.0607002	other_trend	0.00255404	0.00603056
CKB	-	0.411486	1.50098	2.4692	2.51293	1.3635	1.65946	-3.23829	1.87944	2.14173	2.39135	1.72112	1.11962	1.0183	1.35277	0.994722	-3.99454	2.28382	2.13115	1.49731	1.71732	1.3014	1.17095	0.224483	1.73939	1.73558	1.91791	0.0111971	1.75333	1.3187	1.35993	2.51979	1.80376	2.83977	2.7652	2.86523	2.62327	2.93036	3.01007	2.63575	2.61663	2.66098	1.18221	0.339569	1.44215	0.0468386	linear_increasing	0.00287185	0.00663425
FCGRT	-	-2.38085	-2.5325	-2.3794	-2.45618	-2.30686	-2.16562	-2.98091	-2.65871	-1.98393	-2.11239	-2.21455	-2.213	-2.04889	-2.889	-2.75519	-2.07153	-1.62652	-2.25568	-2.01404	-2.24833	-2.23976	-2.42279	-2.51871	-2.55906	-2.36614	-1.94199	-3.95391	-2.38633	-4.73444	-2.30869	-1.58721	-1.37712	-1.77496	-1.35795	-1.48839	-1.718	-1.62383	-1.55312	-1.94831	-1.87482	-1.63037	-2.45753	0.198832	0.594579	0.0822887	other_trend	0.000119292	0.000441771
RAB5C	-	0.832569	0.242857	0.736058	0.435154	0.403788	0.115165	-0.0375373	-0.411631	0.651692	0.852224	0.77906	0.828347	0.0739868	0.741217	-0.0430448	-0.0454211	1.00757	0.82656	0.811786	0.990826	0.401319	0.769832	-3.83019	0.1644	0.801664	0.857447	-4.24204	1.01775	0.15451	1.26193	1.49797	1.74308	0.662845	1.28335	0.955288	1.4845	1.08189	1.21435	1.60053	1.16698	1.26908	0.238262	0.324548	1.231	0.193492	other_trend	0.0132945	0.02397
CYBB	-	-0.780845	-0.478865	-1.08013	-0.218683	-1.13105	-1.48613	-1.65027	-0.0389067	0.507749	-6.67064	0.00715147	-0.0107144	-2.80128	-7.82473	-1.4736	-1.2836	-0.651761	-1.4368	0.950478	-1.50291	0.266777	-0.920163	-2.24124	-2.38014	-2.49086	-1.24111	-2.00378	-0.870647	-2.47769	1.63075	0.522253	1.78627	-0.445523	0.0425037	-0.852083	0.110353	0.072158	0.723264	-0.554587	0.836298	0.224091	-1.39279	0.777113	1.91448	0.100985	other_trend	0.0137897	0.0247237
HSD17B11	-	-1.21346	-1.71349	-0.929248	-1.51034	-1.1034	-1.79796	-2.87716	-1.07972	-0.345233	-0.293819	-1.24125	-0.933499	-1.40945	-1.43737	-1.37714	-2.15776	-0.373062	-1.88116	-0.547952	-0.982803	-0.709574	-1.03626	-6.79056	-1.01057	-0.690032	-1.7983	-1.39065	-1.30203	-1.35521	-0.0735762	-0.307106	0.961375	-0.589655	-0.299175	-0.140466	-0.417395	-0.887522	-0.504815	-0.418113	-0.100173	-0.270304	-1.37873	0.488358	1.18144	0.0521819	other_trend	0.00673775	0.0135448
PPM1F	-	-1.6913	-2.36922	-1.72383	-2.1305	-1.88109	-2.00963	-2.33398	-2.56917	-1.87079	-1.61871	-2.14099	-1.60792	-2.428	-2.19405	-1.92292	-1.97133	-1.51078	-3.27858	-1.57889	-1.94088	-1.43291	-2.40592	-2.53177	-2.17088	-1.73203	-2.53735	-2.09909	-1.60798	-1.82349	-5.16038	-0.961917	-0.878451	-1.4286	-0.852248	-1.63857	-0.962558	-1.78109	-0.891747	-1.06577	-1.17598	-1.16369	-2.14248	0.336664	0.697914	0.0991411	other_trend	0.00013525	0.000491399
PML	-	-0.28116	-7.44679	0.350953	-0.0646645	-0.496382	-1.04781	-0.476126	-1.01946	-0.218232	-2.201	-0.655799	0.362516	-1.21013	-0.767371	-1.2128	-0.804846	0.780239	-0.746082	0.440086	0.202048	-0.560228	-0.671621	-3.80803	-0.986527	-0.344833	0.435201	-1.13093	-0.861615	-1.58097	0.336776	0.0555051	0.331978	0.0724229	0.666022	-0.177312	0.668334	0.175932	0.407517	-0.290531	0.548838	0.245871	-0.856186	0.33638	1.53676	0.0173193	linear_increasing	0.0316164	0.0495651
OSTF1	-	-0.224619	-0.933105	-0.919841	-0.96269	-0.652463	-0.411738	-2.33678	-0.740088	-0.644842	0.506795	-0.524279	-0.389835	-1.25343	-4.98431	-0.893116	-0.838025	-0.568182	-1.58773	-0.135961	-3.86503	0.133302	-1.20917	-1.03311	-0.559208	-0.74339	-1.36268	-0.6972	-0.617533	-1.05048	-0.567573	0.570612	0.0710292	0.0108144	-0.0211365	-0.620942	-0.509762	-0.79576	0.345732	-0.0568781	-0.32004	-0.132633	-1.00221	0.429359	1.07546	0.159008	other_trend	0.0179292	0.0306856
SCP2	-	-0.428912	-0.249083	-0.0557365	-0.703556	0.00324406	-1.09457	-0.733646	-0.213849	-0.148668	0.128308	0.00247612	0.282795	-0.813518	-5.74056	-0.551287	-0.185742	0.467114	-0.00740257	0.354056	-0.200786	-0.0827372	-1.84117	-5.70814	-2.40187	-0.255588	-0.622037	-0.81757	-0.625089	-0.155994	0.814051	0.717146	2.48981	0.803006	0.892112	0.141075	0.858429	0.986815	0.112098	0.692959	0.889248	0.858269	-0.719516	0.649955	1.50171	0.0768027	other_trend	0.00275884	0.00641172
RPS8	-	1.63529	0.798323	1.34476	0.765439	0.855917	0.268446	-0.089724	0.141322	1.57688	1.28297	-0.119236	1.54415	-0.721111	-4.4789	0.471753	-0.164591	1.37572	1.37025	1.76959	-0.434137	0.610407	-0.681683	-4.11759	0.423296	0.35726	1.1691	-0.316045	-0.631749	0.120309	0.952544	1.94104	1.68763	1.59716	1.47427	1.28817	1.41513	1.79397	1.0475	1.3788	1.40498	1.50287	0.235965	0.259639	1.44085	0.350942	other_trend	0.00924505	0.0177868
CAMK2D	-	0.148935	-0.413725	-0.152908	-0.545974	0.069571	-0.427546	-0.571078	-0.279196	-0.252905	-0.299806	0.120995	-0.260825	-0.150557	-5.08226	-0.456468	-0.946307	-0.0358406	0.0456375	-0.24027	-0.0131668	-0.315609	-0.401435	-1.33209	-0.998747	-0.337136	0.0740183	-4.64504	-0.137073	-0.22494	-0.0610453	0.892254	0.60443	0.888075	0.444512	0.426608	0.997218	0.105991	0.723874	0.720066	0.644535	0.644756	-0.604093	0.265874	1.2065	0.132793	other_trend	0.00262083	0.00615799
MRC1	-	0.488552	-2.58803	-1.22284	-3.64084	0.599639	-2.44364	0.193732	-0.656806	0.0258657	-0.0372265	0.582512	0.108634	0.0749184	-0.349348	0.675637	-0.291699	0.620763	0.00782704	1.36834	-0.0677952	0.337198	-0.307013	-3.46084	0.443898	0.97877	0.539976	-1.15121	-0.264543	0.65191	1.377	1.32749	2.43884	0.856238	0.246753	0.164422	0.0670955	1.79955	1.00278	0.0381034	-0.377768	0.756351	-0.246889	0.894625	1.27701	0.000965894	linear_increasing	0.0273913	0.0438718
CAVIN3	-	0.620378	0.933683	0.539061	0.811479	1.03522	0.959996	-3.83277	0.401155	0.883497	0.745005	-0.374715	0.894367	0.649489	-0.840538	0.127717	0.706047	0.152349	0.731555	-0.187462	0.600277	0.306357	1.01859	-0.601032	0.667189	-0.332318	1.36166	-5.95019	-0.767371	-0.289086	-0.362948	0.785835	0.264521	1.10118	1.54387	1.767	1.33719	0.703433	1.44981	1.47623	1.62313	1.20522	0.0202214	0.480628	1.48582	0.520832	other_trend	0.0185296	0.0315167
SACM1L	-	-0.274748	-2.33017	-1.37015	-1.16871	-0.30972	-0.996593	-0.953766	-1.57052	-0.581067	-0.931235	-0.822659	-5.31659	-1.14239	-5.55287	-1.1781	-1.32845	-0.946408	-1.23154	-0.878086	-1.02568	-1.49672	-0.559186	-1.56582	-1.18197	-1.37999	-0.67726	-1.4738	-1.06292	-1.49823	0.107882	0.120724	0.155992	0.366836	-0.0454037	0.0811494	-0.151586	-1.21132	0.769491	-0.186785	-0.532908	-0.0633805	-1.35658	0.531582	1.20348	0.0168803	linear_increasing	0.00228325	0.00549238
SNX6	-	-0.436585	-0.78642	-0.437576	-1.02446	-0.309229	-1.40312	-4.76741	-0.910332	-0.915854	-0.888045	-0.532897	-1.0454	-1.11732	-1.35729	-1.52568	-0.891935	-0.546181	-1.36376	-0.659791	-0.675315	-1.0963	-1.58607	-1.24686	-0.930669	-1.03373	-1.04962	-0.992442	-4.7994	-0.767796	-0.34325	-0.395618	-0.32368	-0.242364	-0.111191	-0.0564268	-0.299108	-1.03558	-0.0139415	0.0611251	-0.489497	-0.290629	-1.18136	0.315588	1.03567	0.213767	other_trend	0.0114323	0.0211888
DBI	-	1.70341	0.383359	1.0191	0.394809	1.53208	-1.13494	-0.281029	-0.116031	-3.29819	0.319826	0.0988097	0.795054	-0.498266	-1.43966	-0.901144	-0.287203	1.47131	1.20131	1.42563	0.419775	0.737713	-0.38718	-0.549285	-0.181729	-0.538534	0.85613	-3.04346	-0.289444	-0.587649	1.36489	2.43787	1.50627	2.91933	2.78171	1.56638	2.01903	1.42005	2.9322	1.32599	2.79888	2.17077	0.00631537	0.673823	1.20674	0.00863194	linear_increasing	4.17048e-06	2.48933e-05
NPC2	-	1.48619	0.134985	-0.601174	0.0804216	1.89358	0.116139	0.997022	-0.619519	1.30407	0.367048	0.785544	0.934507	-0.025091	-4.71476	0.815208	0.452464	0.349039	0.174204	0.145924	-0.378696	1.12705	-0.371468	-0.698784	-0.121541	0.144094	0.467308	0.456851	-2.68908	0.463979	1.69974	1.89384	2.85373	2.06127	2.07441	0.888037	1.3697	2.14164	2.01929	2.1637	1.81109	1.92767	0.139175	0.517875	1.26528	0.037743	linear_increasing	0.000107957	0.000406851
RAB2A	-	0.237845	-0.605552	0.423036	-0.483346	-0.733491	-0.46495	-1.08193	0.0304984	0.504848	-0.0866118	0.166775	0.607108	-0.708234	-0.347429	0.089352	0.53778	0.881813	0.293299	0.239062	-0.916082	-0.973137	-0.243802	-3.82188	-0.0231207	0.169983	-0.168852	-0.703476	-0.616806	-0.23289	0.484682	1.20043	1.06889	0.73382	1.09339	0.902508	0.718428	0.434012	1.30153	0.940828	0.934342	0.932818	-0.251517	0.255434	0.851723	0.0172639	linear_increasing	0.000114992	0.000430828
AK3	-	-1.15241	-0.91201	-0.628254	-1.04906	-1.414	-1.36873	-1.39069	-0.57768	-0.390612	-0.128676	-0.719955	-0.229366	-0.761179	-3.6889	-1.05575	-0.482815	-0.484815	-1.43596	-0.430074	-1.23172	-1.37356	-1.28436	-2.16818	-0.971211	-0.46617	-1.83492	-1.57029	-1.02157	-0.40961	-0.476229	-0.201218	-0.111538	-0.0926677	-0.358053	-0.294959	-0.331405	-0.803554	-0.732053	-0.545674	-0.0218089	-0.349293	-1.03696	0.267982	0.706623	0.0660752	other_trend	0.00493947	0.0105956
CYRIB	-	-0.554394	-0.785596	-0.914914	-1.10676	-1.67042	-1.56744	-1.31299	-1.57859	-0.831303	-1.34668	-1.24754	-1.1878	-1.74728	-1.35409	-1.05186	-1.08358	-1.18348	-1.3167	-0.350251	-0.75308	-1.09168	-1.45961	-5.41616	-1.34666	-1.33429	-1.62225	-1.49161	-1.03953	-1.63501	0.102078	-0.367104	-0.0348646	-1.07421	-0.631947	-1.25626	-0.861978	-1.10335	-0.400877	-0.333278	-0.419822	-0.648369	-1.30932	0.404427	0.877991	0.240257	other_trend	0.0279275	0.0446561
VASP	-	1.12624	0.411714	1.18102	-0.00415703	0.398531	0.305131	0.589946	0.499498	0.986891	1.1235	0.730677	0.956652	0.297077	0.121168	1.0895	0.705425	0.840122	0.366174	1.23305	1.05711	1.14899	1.23734	-1.96434	0.848586	0.615741	0.347974	-0.255714	0.741113	0.243286	1.18945	0.87537	1.44906	1.39318	1.2369	0.938767	0.837172	0.796891	1.39348	0.91508	1.00595	1.08419	0.60559	0.256172	0.633802	0.200915	other_trend	0.0264516	0.0425796
AKAP2	-	-4.87552	-3.52196	-3.29654	-2.96445	-3.04593	-4.63199	-2.96433	-3.10313	-4.27124	-4.63201	-3.14318	-2.75829	-3.88746	-3.88549	-3.11882	-1.92922	0.529852	-4.07696	-1.59906	-2.99522	-3.44524	-1.15702	-3.03396	-3.65295	-1.62613	-4.29155	-3.81864	-1.04895	-2.41896	-0.406017	1.50135	0.77862	1.04939	2.4079	1.13604	3.05647	-0.0753091	2.644	1.83419	3.33738	1.767	-2.96901	1.08872	1.29084	1.27107e-08	linear_increasing	1.10472e-12	5.44429e-11
ATP2B4	-	-1.1455	-0.879046	-0.905014	-1.77253	-1.14491	-1.42607	-1.69726	-1.03603	-1.67027	-1.09921	-0.637164	-1.24366	-1.2154	-1.0011	-0.915116	-1.38024	-0.104269	-0.998194	-0.980437	-0.96948	-1.44328	-0.350385	-0.872906	-0.902125	-0.961622	-0.278386	-3.0485	-1.09542	-1.42892	-0.385589	0.213107	0.688289	-0.139728	0.996123	0.315281	0.556629	0.0514056	0.802978	0.578163	0.828013	0.489026	-1.0996	0.367576	0.545178	1.63485e-05	linear_increasing	2.18591e-10	4.88526e-09
ALDH7A1	-	-0.614047	-0.838936	-0.303217	-0.250096	-0.730526	0.419528	-0.24018	0.334032	-0.190253	0.263849	-0.542275	-0.313382	-0.517288	-0.81134	-0.302853	0.617505	0.507635	-0.589177	0.00496638	-0.131118	-0.649741	-0.15835	-0.689362	-0.961253	-0.040141	-5.44162	-0.0659717	-0.476159	-0.262984	-0.184608	0.723056	0.175651	0.759797	0.870898	0.176892	-0.134155	0.0552892	0.479154	0.212344	0.675086	0.399401	-0.438579	0.345924	1.02816	0.247825	other_trend	0.0163994	0.0284473
RRAS	-	-0.131249	-0.671044	0.160072	-0.140716	-0.271932	-0.0965248	-0.283324	-0.239221	0.300618	-0.519887	-0.0569128	-0.4316	-0.282818	-0.438214	0.0520399	1.0088	0.524074	0.249234	-0.19581	0.232522	-0.514039	0.763908	-4.84833	0.146205	0.304706	0.205112	-0.227425	-0.0226237	-0.0883344	0.921641	1.64838	1.12512	0.804119	1.54679	2.03368	2.03874	1.48627	1.15184	1.78466	1.62007	1.52397	-0.153036	0.399327	0.97773	0.00110009	linear_increasing	6.20112e-06	3.53666e-05
FBLN2	-	0.333684	1.16089	1.87805	1.96247	0.622041	1.6071	1.39192	1.51597	1.96921	1.11997	-0.0377519	1.58623	1.01832	1.94272	0.0715211	0.732452	1.6151	1.20533	1.01874	0.855093	0.0628289	0.980582	1.64724	0.265143	1.49169	0.669983	0.666252	1.19999	-4.52506	0.759291	1.15393	0.846108	2.84558	2.116	3.68657	2.39026	1.64563	2.58771	1.77666	1.55693	2.06054	0.8929	0.846766	1.17909	0.636388	other_trend	0.00646088	0.0130439
PPL	-	-1.29347	-2.7306	-1.67059	-2.83507	-0.841738	-0.692997	-1.5778	-1.08241	-0.831694	-0.0577823	-2.79515	-0.939685	-1.85449	-1.43816	-1.97341	-0.230487	0.782216	-0.73092	0.196106	-1.86987	-1.54242	-0.479815	-0.835014	-0.480156	-0.419153	-0.287543	0.274442	-0.312213	-1.6224	1.10325	3.26672	2.6605	2.87025	3.41236	3.00909	3.61354	1.96137	3.51908	2.94708	3.41678	3.06768	-0.968967	0.497626	0.982345	9.35746e-10	linear_increasing	6.31644e-15	1.01168e-12
PTPN6	-	-0.183564	-1.18605	-0.733874	-1.95162	-1.54384	-2.45057	-1.47373	-1.93451	-0.661867	-1.57585	-0.730636	-0.389973	-2.77146	-2.19968	-1.40604	-1.09881	-0.391815	-1.6203	0.28674	-4.20484	-0.612422	-1.84577	-4.4246	-1.69248	-0.769717	-1.14969	-1.74438	-0.881639	-0.872473	0.423302	0.378829	1.46889	-0.43877	-0.179714	-1.07724	-0.318886	-0.612509	-0.324866	-0.506274	-0.0376003	-0.164814	-1.39307	0.687578	1.09265	0.0187357	linear_increasing	0.00196422	0.00485247
PDXK	-	0.116063	0.443497	0.721356	0.424667	-0.0472495	-0.39466	-0.0629017	0.153401	0.685805	0.470515	0.260746	0.456904	-0.0638522	0.148525	-0.316018	0.59562	0.425464	0.271093	1.11206	0.958853	0.0401921	0.0678757	-5.55752	0.386792	0.423585	0.689681	0.211088	0.201081	0.414444	0.630189	0.630535	1.74452	1.27829	0.937488	0.844516	1.37917	1.09948	1.05762	1.37013	1.11137	1.14531	0.12891	0.314743	1.12661	0.0972259	other_trend	0.00810022	0.015854
CDC37	-	-0.909476	-1.38687	-2.21796	-1.56934	-1.4996	-1.57215	-1.65827	-1.75608	-0.874469	-0.743798	-0.964592	-0.783693	-1.47153	-2.00724	-1.2552	-1.2444	-0.750738	-1.25415	-0.390475	-1.70091	-1.13956	-1.86641	-2.00726	-1.45554	-1.26005	-5.31547	-1.70101	-1.24864	-1.13734	-0.214119	-0.0497644	-0.173321	0.0849199	-0.464619	-1.74645	-0.222668	-0.558921	-0.0855556	-0.0974253	-0.520727	-0.383453	-1.44521	0.52549	0.870088	0.0255648	linear_increasing	0.000842152	0.00235606
ACSL1	-	-0.05918	-2.04526	-1.17235	-1.89958	-0.714897	-1.50237	-1.19961	-0.908115	-0.220087	-0.534289	-0.537257	-0.43575	-2.14617	-2.92403	-0.588646	0.122276	0.0687918	-0.239446	-0.149073	-1.09219	0.0078411	-1.77928	-1.69839	-0.753084	-0.685837	-0.776512	-1.3559	-0.492978	-0.861997	0.851511	1.34794	2.83721	1.09947	1.30717	0.131337	1.31238	0.243868	0.972948	0.936988	1.29133	1.14806	-0.857396	0.737479	0.809323	4.40018e-06	linear_increasing	3.09033e-08	3.39407e-07
ITGA1	-	-1.55586	-2.57693	-1.07792	-0.344029	-0.233126	-0.301373	-1.93326	-0.108564	0.326919	-0.068171	0.735549	-0.420069	-0.119196	-2.76084	-0.0245028	0.85038	0.939446	0.0875448	-0.605335	0.506488	-1.07555	1.21243	-2.98759	0.484	0.468354	0.0627379	0.0312449	0.527761	0.0768193	0.333574	1.35241	0.697531	0.506058	2.06641	2.00275	2.47758	0.562399	1.4552	1.73292	1.43048	1.42837	-0.318303	0.672622	1.08764	1.28353e-05	linear_increasing	2.80263e-05	0.000127261
ITGB2	-	0.745443	0.632023	-0.76927	0.192663	-0.168952	-0.327329	-0.939215	-1.25124	-0.799874	0.282426	-0.192847	0.792945	-0.844392	-0.387555	0.417593	-1.75383	0.457371	-1.12703	1.3116	-0.108491	1.15367	0.124882	-2.0012	-1.82258	-0.35163	0.271529	-1.24237	-1.42644	0.36386	1.59473	0.930031	3.10755	-0.438925	0.63187	0.2541	1.18754	0.959444	0.872085	0.783951	0.755991	0.904364	-0.239117	0.899196	0.952074	0.0337156	linear_increasing	0.00192898	0.00477771
CD14	-	-0.243864	-0.154183	-0.843434	0.234861	-0.619562	-1.32209	-1.90479	-0.651371	0.0769755	-0.486464	-1.03948	0.00942793	-1.23586	-2.90526	-2.28998	-0.475035	0.0620258	-0.397163	-0.365408	-0.752071	-1.4149	0.519236	-0.0543292	-1.26749	-0.657967	-0.0512219	-3.97984	-0.299007	-1.51348	-0.828743	0.86423	0.50764	0.860493	1.61458	0.650723	1.62142	0.796633	1.12379	0.537721	0.850334	0.942757	-0.828349	0.39808	0.970127	0.0114578	linear_increasing	2.14998e-06	1.37284e-05
NIBAN2	-	0.124612	-0.740688	0.117955	-1.46997	0.184241	-0.332383	0.387583	0.0914744	0.769315	0.536018	0.548028	0.58241	-0.145253	-1.37873	0.384121	-0.0554055	0.416623	0.616676	0.604492	0.287875	0.702994	0.424047	-4.55226	0.287565	0.864141	-0.110604	-0.742577	0.184571	0.104759	1.1172	1.5283	1.5062	1.69752	1.8369	1.00298	1.21643	0.755153	1.64102	1.1543	1.60337	1.39422	-0.00637239	0.345411	1.0458	0.00419628	linear_increasing	0.000192172	0.000671554
PCYOX1	-	0.731875	-4.31749	0.419101	0.458626	0.258159	-1.43978	-0.256852	-0.990153	1.22931	-0.833773	0.223024	0.41102	-1.71988	-1.52925	0.126122	0.248953	1.43081	-0.13166	0.407007	-0.233182	0.109902	0.272361	-2.09868	0.222918	0.429914	0.811304	-1.77553	0.155003	-0.529128	1.23513	2.9204	2.20986	2.34381	2.7963	2.33142	2.63978	1.65866	2.66116	1.64149	2.7845	2.39874	-0.222494	0.455867	1.19932	1.63278e-05	linear_increasing	6.22131e-08	6.32664e-07
CSTB	-	2.17948	1.66883	2.00876	1.52501	1.47734	0.992467	0.542701	1.1986	2.15795	1.03884	1.43574	2.6204	0.55574	1.34386	0.84006	0.739004	1.63053	2.29404	2.10249	1.5205	2.5638	0.419507	1.95598	0.668872	1.11761	1.61671	-4.63118	0.63272	0.588814	2.10976	3.10413	3.24918	2.06182	2.97629	2.99533	2.31383	2.39387	3.24709	2.34659	2.95394	2.76421	1.2305	0.437932	1.28097	0.153719	other_trend	0.000705828	0.00204925
PSMB9	-	-0.933066	-0.605406	-0.737348	-0.195759	-0.884944	-1.5209	-0.936699	-1.61482	-1.14429	-1.16724	-1.18121	-1.12624	-1.09536	-4.05922	-0.619085	0.10618	-0.326509	-1.55464	-0.186191	-0.322884	-0.869413	-0.608136	-1.929	-1.20047	-1.15734	-0.867237	-1.45066	-0.534873	-0.954371	-0.234957	-0.640725	-0.784216	-0.620856	-0.448799	-0.301342	0.143707	-0.745254	-0.497514	-0.294294	-0.00793584	-0.419723	-0.99707	0.307641	0.751585	0.0921095	other_trend	0.0241887	0.0394993
TMEM43	-	0.671985	-0.00711041	0.470685	0.625706	0.490832	0.448179	0.583854	0.550182	0.902992	0.683768	0.442467	0.667698	0.249026	0.745346	0.475735	0.226503	0.94731	0.413888	0.12471	0.319637	0.194413	-0.140143	-4.00233	0.658137	0.715652	0.597928	-0.0308113	0.42214	0.667033	0.863756	1.2063	0.934913	0.836282	1.0498	1.78777	1.11645	0.43086	0.807084	1.47073	0.973405	1.06136	0.332639	0.373573	0.86275	0.19187	other_trend	0.0140741	0.0250932
EPHX1	-	2.18656	1.86414	2.39278	1.59792	2.08571	1.89105	1.23012	2.46594	1.96724	2.43961	2.40181	2.06034	1.05845	1.03277	2.30247	2.00459	2.40009	2.29919	1.89568	2.27812	1.83524	2.49011	-5.1435	2.31867	2.55406	2.06761	1.47701	1.86458	2.01303	2.66057	3.08882	3.11956	3.05997	2.85275	3.20716	2.86944	2.59291	2.91123	2.70469	3.01248	2.9419	1.79973	0.192825	1.37771	0.140591	other_trend	0.013498	0.0242843
APEX1	-	-0.634621	-0.88715	-0.154765	-1.00972	-0.814625	-0.939243	-1.32775	-1.15289	-0.672774	-0.85793	-0.899332	-0.386506	-1.36846	-2.08393	-1.31082	-0.685992	-0.760012	-1.1177	-0.645189	-1.44231	-0.617955	-1.27589	-5.37395	-1.16238	-0.579136	-1.46054	-1.42905	-1.06481	-1.2281	-0.533843	-0.0674627	0.095512	0.112133	0.703114	-0.162963	0.014327	-0.222178	0.277028	-0.0754507	-0.733731	-0.00596704	-1.12925	0.367754	0.893806	0.0887681	other_trend	0.000452365	0.00140233
SARS1	-	-0.957623	-0.975116	-1.26849	-0.648561	-0.57471	-0.72896	-0.76908	-0.752188	-0.252578	-0.323145	-0.816567	-1.0577	-1.55161	-5.44057	-0.916102	-0.449287	-1.41552	-1.17146	-1.03203	-0.179603	-0.0407318	-1.12791	-0.948965	-1.32463	-0.574474	-1.38851	-0.467293	-1.66231	-1.1234	-0.329606	0.122134	1.02885	0.541582	0.313106	-0.617497	0.873773	0.0147565	0.629603	0.519961	0.438707	0.386497	-1.00896	0.468474	0.935718	0.0113159	linear_increasing	6.18109e-05	0.00025223
MYO1D	-	-0.425655	-0.479464	-0.607916	-0.474954	-0.489543	-4.67774	-1.39673	-2.22935	0.183433	-0.808806	-1.1791	-0.207728	-1.29885	-1.61067	-1.27593	-0.3382	0.199771	0.133456	-0.917526	-0.851396	-2.31826	-0.573229	-2.38444	-1.58179	-1.82803	-0.0626017	-2.47283	-1.21654	-2.09134	-0.403933	0.707458	-0.251811	1.86815	1.41185	1.58022	0.332339	-0.574506	1.78344	1.29297	1.06489	0.921501	-1.12286	0.848503	1.0399	0.00580999	linear_increasing	1.94809e-06	1.27771e-05
LIMS1	-	-0.659312	-0.971927	0.014534	-1.53742	-0.423616	-1.0115	-2.62258	-2.24178	-0.436645	-0.615083	-2.46428	-0.155689	-2.69157	-2.14933	-2.51302	-1.77358	1.06465	-0.541578	-0.826402	-2.02338	-1.3274	-1.68708	-3.4327	-3.25335	-1.2233	-1.28726	-3.31603	-2.96696	-2.77372	-0.68756	2.01627	1.90425	2.4845	2.58263	2.66081	2.03658	1.46763	1.83388	2.10237	2.38108	2.147	-1.55116	0.375982	1.12886	0.00138013	linear_increasing	2.60452e-12	1.1377e-10
RAB7A	-	1.61227	1.33713	1.50717	0.922944	1.36296	0.848466	0.654767	1.17993	1.59515	1.43096	1.43877	1.45984	0.648763	0.34992	0.95998	1.17186	1.54703	1.39171	1.60604	1.17365	1.02511	1.29297	-5.72836	0.580779	1.25011	1.94439	0.241447	0.967804	0.618364	1.89018	2.10838	2.87074	1.77189	1.84525	1.70201	1.97534	1.95375	1.95538	2.18106	1.87541	2.02392	0.942737	0.330325	1.33045	0.265153	other_trend	0.01592	0.0278165
DCTN1	-	-1.2766	-1.16898	-0.739002	-1.05702	-0.751492	-1.38042	-1.00316	-1.47981	-1.71096	-1.0254	-0.789772	-0.961495	-0.740055	-2.28482	-1.03615	-0.763125	-0.172079	-0.221094	-0.764038	-0.459823	-1.00026	-0.663312	-1.5711	-1.95881	-1.3999	-0.516886	-1.53698	-6.69965	-0.615241	0.174468	0.353652	-0.785348	-0.469213	0.087327	0.462073	0.659602	-0.474765	0.0289969	-0.0766729	-0.131095	-0.0345443	-1.18577	0.454066	1.16854	0.14851	other_trend	0.00451893	0.00978084
DARS1	-	-0.663064	-0.401118	-0.138307	-0.710372	-0.365034	-1.69077	0.0412585	-1.0168	-0.653977	-0.511511	-0.5696	-0.0587996	-0.939532	-0.979122	-0.531076	0.656364	-0.427476	-0.528783	-0.505969	-0.412084	0.529511	-0.878359	-4.23722	-0.978437	-0.817264	-0.427217	-1.03497	-0.800381	-0.863435	0.00552408	0.708289	0.0867789	-0.729008	0.125581	0.112372	0.555543	-0.218722	0.11111	-0.122956	0.0755743	0.0704563	-0.6636	0.395679	0.823607	0.138102	other_trend	0.0103197	0.019522
SLC25A24	-	0.220683	-0.111244	0.233617	0.197498	0.143794	-0.0921026	-4.62981	0.0370329	0.300573	0.37508	-0.0804435	0.00447148	-0.24355	-1.55408	-0.158773	-0.275895	0.115129	-0.114733	0.26768	0.415049	0.201231	-0.078799	-3.12109	0	-0.320724	0.346871	-1.55348	-0.449321	-2.11049	0.942589	1.47818	1.65702	1.16626	0.957629	0.554077	1.02486	0.217298	1.20144	0.842382	0.769667	0.986881	-0.369775	0.424081	1.15327	0.0428905	linear_increasing	0.000874209	0.00243159
SAR1A	-	0.939867	0.397969	0.456802	0.780271	0.735115	0.359575	-0.280331	0.132933	0.672905	0.630986	0.634379	0.854779	0.398306	0.0296213	1.03716	0.998546	0.795428	1.26083	1.0917	0.867418	0.536238	-0.00827494	-2.92084	0.476873	0.26042	0.398006	0.272367	0.683045	0.127222	1.07345	1.16695	1.33259	0.927178	1.06388	1.19212	0.948536	1.47222	0.6866	0.853526	0.945438	1.0589	0.456425	0.235318	0.736725	0.150725	other_trend	0.0159021	0.0278105
DNPEP	-	0.164543	0.0770734	0.0442835	0.658957	0.31821	-0.514678	-0.683556	0.161516	0.181981	-0.198538	-0.186891	0.375602	0.17426	-0.404439	-0.0141766	-0.407181	0.285263	-0.386392	-0.237155	0.0632981	-0.61574	0.111126	-6.0423	-0.0521518	0.328718	0.294049	-0.708346	-0.950993	-0.46793	0.0285405	0.962551	1.12459	0.783622	1.26408	0.945438	1.1532	0.727092	1.51341	0.899346	1.41237	1.07857	-0.286768	0.261713	1.15198	0.137952	other_trend	0.000707957	0.00205233
MAOA	-	0.900794	-0.0759262	0.732859	-0.33788	1.53366	1.15193	0.655627	1.10125	1.20726	1.58461	1.14837	1.21578	0.740571	-0.217865	1.15578	0.786872	1.87733	1.40742	1.01916	1.57542	1.14286	0.335845	-6.03633	1.44184	2.0743	1.35846	0.525063	1.37647	1.43906	1.93572	3.1547	2.23356	2.5175	2.10474	1.97542	2.7124	1.40122	2.31908	2.29743	2.44381	2.31599	0.82521	0.46213	1.42363	0.0145577	linear_increasing	0.0025528	0.00603056
HMGN3	-	-0.885717	-0.725445	-0.153198	-1.69062	-0.853785	-0.195177	-1.5377	-1.21202	-0.824573	-0.828955	-1.12888	-1.16969	-1.51482	-1.90331	-1.71353	-1.89569	-0.61391	-1.64291	-1.38642	-1.5476	0.00500627	-1.52005	-5.30399	-0.880966	-1.45881	-1.02535	-0.74371	-1.70339	-1.46477	-1.28546	0.428429	-1.3459	-0.50736	-0.08612	-0.442348	-0.248005	-0.660537	-0.317385	-0.393535	-1.07969	-0.465245	-1.29351	0.495549	0.911585	0.40568	other_trend	0.00963958	0.0183985
SLC25A11	-	0.0139706	-0.524855	0.0375389	-0.238594	0.0440688	-1.09483	-0.668869	-0.319002	0.310133	0.185664	0.00318281	0.131837	-0.725905	-0.803619	0.0811434	-1.15382	0.0634357	0.0383654	0.452678	0.34898	0.320619	-0.0829376	-1.58378	-0.087583	0.0385895	-0.205741	-4.6784	-1.10716	-1.70818	0.673883	1.12706	0.852699	0.623335	0.409052	0.27898	0.179495	-0.4576	0.573892	0.034372	0.400697	0.402198	-0.407973	0.440471	1.00406	0.353019	other_trend	0.0186792	0.0316914
ICAM1	-	0.458218	-2.12901	-0.588724	-0.485247	0.720775	-0.738686	-0.0319049	-0.568379	0.732651	0.861738	-0.0461349	0.720293	-0.824593	-0.774585	-0.0845945	0.309306	0.670896	0.00818648	0.98351	0.903208	1.19086	-0.322566	-3.31022	0.378139	0.616817	0.755822	0.226517	0.174031	0.230396	0.831252	1.46642	1.30683	1.80646	1.46623	1.29664	1.69727	0.431981	1.428	1.74912	2.22708	1.4876	0.0289325	0.46533	0.956021	0.000199834	linear_increasing	4.36569e-05	0.00018605
HK1	-	1.6234	0.935582	1.50618	0.755293	1.40469	-0.670392	0.359617	-0.250723	1.36694	1.18168	1.41525	1.53652	0.00720097	-0.241576	0.922705	0.104293	1.24733	1.47811	1.69295	1.57478	1.19988	0.850924	-4.4849	0.817134	1.27454	1.84013	-0.830681	0.775272	-0.703768	1.68201	2.6554	2.55644	1.84243	1.80372	2.03079	1.84467	0.56346	2.49114	1.97789	1.74805	1.9514	0.679012	0.593747	1.25039	0.126212	other_trend	0.00379529	0.00847893
S100A12	-	-1.73639	1.58562	1.5399	1.97722	0.838969	-0.455452	-0.148319	-1.28664	-0.349568	0.836402	-1.07242	0.657858	-0.116386	0.762894	-1.76863	-1.48417	0.825942	-1.90064	1.36832	-1.83094	1.05916	-4.87555	1.1777	-0.462087	-0.383778	-2.51687	-0.886189	1.08966	-0.274566	3.99887	2.33544	1.67416	-2.26143	1.72003	1.08369	1.82024	1.9324	1.79959	1.8618	2.55939	1.45253	-0.127669	1.36253	1.68946	0.120422	other_trend	0.0109715	0.0205409
ROCK2	-	-1.98208	-2.8649	-2.33001	-2.4382	-1.9968	-3.34411	-2.57934	-2.94552	-2.01056	-2.1653	-2.15074	-2.05105	-2.01768	-4.60524	-2.32091	-2.44787	-1.97576	-2.2708	-2.49084	-2.60178	-3.48538	-2.20907	-3.69035	-1.9701	-2.3518	-1.30055	-2.58228	-2.03809	-2.40507	-1.86302	-1.22412	-2.03645	-1.28816	-1.58622	-1.62701	-1.68293	-1.78627	-1.58116	-1.72561	-1.7052	-1.62431	-2.44951	0.233997	0.645658	0.00426759	linear_increasing	0.000350085	0.00111957
GRHPR	-	0.143709	0.480735	0.1723	0.269791	0.0151668	-0.266417	-1.0638	-1.39354	-1.58706	-0.165419	-0.63682	-1.03494	-0.489261	-1.12947	-1.12159	-0.715338	-0.0986783	0.812428	0.0199637	-4.30634	-1.15528	0.174605	-1.32675	-0.819364	-0.212249	0.167935	-1.19202	-0.549806	-0.485826	-0.261246	0.878166	0.334498	0.82607	0.676953	0.419103	0.377372	-0.509561	0.890209	-0.0500195	0.393822	0.423661	-0.591819	0.441791	0.936084	0.132737	other_trend	0.00217296	0.00527993
BCAP31	-	-0.48599	-0.315768	0.100398	-0.423323	-0.220534	-0.746773	-1.08202	-1.10677	-0.115491	-0.312284	-1.02824	-0.344932	-1.54782	-3.79188	-1.02557	-0.813961	-0.0280233	-0.174605	-0.571447	-0.872834	-1.30224	-0.824189	-1.07558	-2.14267	-1.11535	0.329713	-1.43647	-1.07849	-0.899	0.279369	0.236435	0.0838906	0.443912	0.000570342	-0.0448112	0.527061	0.235906	0.0532571	0.469521	0.223155	0.22289	-0.805759	0.203234	0.799429	0.0699535	other_trend	0.00028754	0.000954495
TGFB1I1	-	0.246329	0.775708	0.559276	0.643873	0.966568	1.34616	0.159423	0.916576	0.791832	0.597863	0.376536	1.16175	-0.830162	-4.75408	-0.0487984	0.588551	0.611933	0.80627	-0.696751	0.321518	0.438518	0.865191	0.334252	-0.725467	-0.379141	1.04332	-0.0363536	0.00649118	-0.808979	0.0360806	1.15375	0.612148	1.62248	1.41282	2.65807	1.50725	0.948262	1.41694	2.08444	1.31492	1.47311	0.177143	0.5727	1.10261	0.217771	other_trend	0.00107754	0.0029252
PPP1R12A	-	-0.692079	-0.763373	-0.805374	-0.872375	-0.572865	-0.440935	-1.42235	-0.616432	-0.462154	-0.637885	-0.978651	-0.617025	-1.20559	-2.53514	-1.19445	-1.04765	-0.565078	-0.845933	-1.08575	-0.715601	-0.650875	-0.961971	-4.16786	-1.02172	-0.886193	-0.57114	-1.70477	-1.18956	-1.40812	-0.697649	-0.475653	-0.833779	-0.766518	-0.221802	0.19671	-0.186622	-0.809427	-0.111968	-0.0044128	-0.306703	-0.352018	-1.04455	0.358133	0.7292	0.395703	other_trend	0.00664138	0.0133802
ATP5MG	-	-0.614199	-3.78127	-0.40433	-0.598376	-0.474515	-0.648837	-0.647564	-0.63478	-0.226308	-0.888683	-0.653778	-0.752117	-1.40539	-1.24384	-0.861207	-0.763628	-0.711441	-0.506093	-0.516024	-0.429476	-0.906774	-0.546955	-1.53929	-0.900643	-0.761967	-0.689573	-1.63214	-0.870726	-0.756644	-0.570608	-0.213754	-0.0193636	-0.318975	-0.610064	-0.0499105	-0.0184179	-0.717011	-0.70107	-0.253362	-0.540562	-0.344249	-0.864573	0.278837	0.638237	0.022432	linear_increasing	0.0175483	0.030141
FHL1	-	2.87763	3.36672	2.87535	3.01465	3.65765	2.36663	1.40084	2.18499	3.43105	2.78178	2.68662	3.17928	1.80868	-0.549823	2.24823	2.08024	4.26223	3.19788	1.75646	2.6039	0.0250265	3.1968	-5.11259	2.22267	1.72682	2.91525	1.56186	1.66601	1.60255	3.1022	4.75903	4.08886	4.95161	5.21129	5.71345	4.79363	4.75869	5.17951	4.87913	4.78622	4.91214	2.13792	0.416387	1.69993	0.0463946	linear_increasing	1.06979e-05	5.55712e-05
ATP5PD	-	0.696228	0.370707	0.590343	-0.296984	0.432839	0	-0.532403	-0.0864385	0.608199	0.238074	-0.198321	0.310146	-4.45193	-0.962046	-0.37708	-0.0514999	0.999008	-0.00139478	0.678928	-0.0340534	-0.243549	-0.642913	-1.50866	-0.679844	-0.386612	0.721473	-1.02019	-0.742361	-0.675046	0.162941	0.959884	0.73477	0.469019	0.417257	0.544266	0.54399	-0.152899	0.788427	0.281373	0.697	0.528309	-0.236081	0.310264	0.995376	0.476299	other_trend	0.0228643	0.0377212
AKR1C3	-	0.820332	0.75579	0.814803	0.799032	0.755729	0.907832	-0.0534176	-0.201529	0.821485	0.385331	-0.368874	0.59418	-0.974104	-0.308616	-0.728673	-1.29839	0.842303	1.08849	-0.850181	0.825579	-4.43369	-0.905668	-0.917825	-0.784691	0.190935	0.219799	-0.499465	0.25515	-1.55286	-0.0566741	0.172218	1.98959	0.677386	2.15992	1.28586	0.217065	-0.223811	1.18315	1.94093	0.607668	1.001	-0.128596	0.841905	1.11589	0.654183	other_trend	0.00577388	0.0119071
QARS1	-	-0.940636	-1.05028	-0.329854	-1.42014	-0.614087	-1.42324	-1.56269	-1.54784	-0.512996	-0.900582	-0.998496	-0.283346	-1.55841	-2.46822	-1.13912	-1.34093	-0.744366	-1.08119	-0.559577	-1.32271	-1.24955	-1.88684	-5.15214	-1.03964	-1.1948	-1.91554	-2.14048	-1.58285	-1.27135	-0.486628	-0.0676482	-0.136644	-0.361942	-0.221662	-0.336435	-0.474746	-0.964835	-0.384453	-0.8836	-0.393355	-0.422532	-1.32395	0.292653	0.892619	0.231871	other_trend	0.00349839	0.00787342
STXBP2	-	-0.831317	-1.04396	-1.1575	-0.71714	-0.499252	-2.26941	-1.73665	-1.34765	-1.91841	-0.671836	-1.21996	-0.460033	-1.70791	-1.27571	-1.12823	-1.31366	-4.01824	-1.30275	-0.579996	-0.332076	-0.976645	-2.55892	-5.13274	-0.948458	-1.04685	-0.611427	-1.578	-2.09741	-1.61818	-0.993797	0.0462775	0.807109	-0.183046	-0.554782	-1.3189	-0.501116	-0.59296	-0.182079	-0.779025	0.186795	-0.307173	-1.43647	0.5839	1.02283	0.120082	other_trend	0.00211726	0.00516419
TPM1	-	-0.942725	-0.529881	-0.802095	-3.41955	0.11844	-0.668648	-0.100726	-0.791603	-0.950688	-0.246385	-0.0486502	-0.297472	-0.564665	-0.478883	-0.501865	-0.254046	0.766853	-0.266022	0.544257	-0.0628783	-0.535377	-0.115467	-1.52345	-0.406208	-0.554319	0.0203133	-0.527082	-0.0723122	0.112324	-0.313155	0.419853	-0.4301	-0.181361	0.138074	0.0589273	0.616632	-0.0553974	0.0358958	0.018777	0.410429	0.103173	-0.447066	0.309774	0.718579	0.00252344	linear_increasing	0.0249766	0.0404764
MARS1	-	-1.77849	-1.80121	-1.90074	-1.76396	-1.65783	-1.94336	-2.08828	-2.37582	-1.63007	-2.19524	-1.88533	-1.78715	-5.69685	-3.29133	-2.51797	-2.25558	-1.84613	-1.93942	-1.77969	-1.89427	-2.13429	-2.54384	-3.57747	-2.87086	-2.48628	-2.15555	-3.03226	-2.38999	-2.76809	-1.43657	-2.04446	-1.35287	-1.39371	-1.84212	-1.5649	-1.52544	-1.74199	-1.53771	-1.94146	-1.81598	-1.67606	-2.31413	0.234759	0.817857	0.479573	other_trend	0.0206512	0.0345274
ATP6V1B2	-	0.72124	-0.536932	-0.674966	0.480052	0.494356	-0.805894	-1.06543	-0.480172	-0.184122	-4.51967	-0.688019	0.217811	-1.44063	-0.636956	-0.870968	-1.80995	-0.107377	-1.06576	0.810195	0.0375843	0.573642	-0.543355	-1.29698	-0.657794	-0.32877	-0.127001	-0.871983	-1.75101	-1.56365	0.734819	0.444257	2.55672	0.635964	0.632645	0.0346068	-0.0293593	-0.0878057	0.965528	0.856667	0.728861	0.673808	-0.59859	0.760542	1.05016	0.0392712	linear_increasing	0.00113085	0.00304412
NAMPT	-	0.316639	-0.596351	0.353324	0.167466	0.864221	-0.991577	-0.505475	-1.1698	0.284829	-0.687608	0.0848156	0.73854	-1.45702	-3.15768	-0.467323	-0.279586	0.0458214	-0.276553	0.99022	0.146524	0.839382	-2.31508	-2.67973	-0.169366	0.346273	-0.414948	-0.76737	-0.0588757	-0.251396	0.777949	1.40876	2.00481	1.51993	0.950564	0.0132387	1.0273	1.53886	1.00571	1.81901	1.31509	1.26033	-0.342991	0.55844	1.01434	0.00727499	linear_increasing	3.00505e-05	0.000134007
CRYZ	-	1.43078	0.167245	0.322909	0.543951	1.38646	0.281335	-0.494334	-5.71844	1.00082	0.811988	-0.236966	0.874131	1.23885	-0.101586	0.561168	-0.479037	1.98265	0.882833	-1.38496	1.16446	-1.20586	0.206176	-0.290308	0.842891	0.123362	1.24398	-0.170843	0.315667	0.289609	-0.0032815	0.0541418	0.694288	1.2218	1.93075	1.13347	1.53718	2.05257	1.14633	1.27211	1.47522	1.25179	0.186188	0.577851	1.35193	0.108017	other_trend	0.0212127	0.0352383
TMOD3	-	-0.0995498	-0.209056	-0.244004	-0.415596	0.483297	-1.18891	-0.577677	-1.22015	-0.162868	0.491889	-0.11866	0.115986	-0.661191	-1.75423	-1.05711	-0.81062	0.332087	-0.607941	0.251397	0.101845	-0.472345	-0.891554	-3.4191	-0.216306	-0.131193	0.429137	-1.31788	-0.643075	-0.781107	0.176929	0.721697	0.809109	0.715288	0.897505	0.23348	1.02753	-0.0164367	1.29772	0.727928	1.09457	0.750839	-0.487252	0.391252	0.799131	0.0216692	linear_increasing	3.52557e-05	0.000154003
DDX6	-	-1.21954	-1.11688	-1.4344	-1.59958	-1.25538	-2.30417	-2.331	-1.86314	-1.7562	-1.25218	-2.15004	-1.41434	-2.27349	-2.4403	-2.37032	-1.70724	-1.52378	-1.72574	-1.62792	-2.03683	-2.10696	-2.01211	-2.48756	-4.56473	-2.07423	-1.56055	-2.91087	-2.43364	-2.36578	-1.42371	-1.4473	-1.27308	-1.39714	-1.24637	-1.25408	-1.35885	-1.806	-1.45252	-0.642806	-1.36039	-1.32385	-1.97809	0.288572	0.671001	0.765546	other_trend	0.00510449	0.0108479
FLOT1	-	-1.40581	-1.49137	-1.91018	-1.17637	-2.52153	-1.54085	-1.33229	-1.18166	-1.44873	-1.35686	-1.65915	-1.35947	-1.10175	-0.840209	-1.68721	-0.739916	-0.882259	-1.91494	-1.28151	-1.06014	-1.59165	-1.37235	-2.25568	-0.958896	-0.792843	-1.78157	-1.08781	-1.54025	-0.922313	-0.839404	-0.268852	-0.490629	-0.711127	-0.509124	-0.843548	-0.203545	-0.799846	-0.205885	-0.419508	-0.510783	-0.496285	-1.36783	0.232607	0.431994	2.68201e-06	linear_increasing	4.74025e-07	3.89349e-06
HSD17B12	-	0.328537	-0.457785	1.23557	-0.0892968	-0.644457	0.2892	0.374823	0.627015	1.25926	1.37111	1.00523	1.45348	0.146669	0.0594583	1.04556	0.354889	1.42321	0.743508	1.16545	0.279548	0.627399	0.117295	-1.23883	1.1142	1.10917	-0.678606	0.636185	0.980502	0.940769	2.03876	1.99499	1.98532	2.00046	1.84326	1.19836	1.49922	0.939796	1.77536	1.88174	1.53744	1.66559	0.587261	0.365511	0.735039	0.000173306	linear_increasing	7.6836e-05	0.000305517
GNAQ	-	-0.781355	-1.34453	-0.798099	-0.949035	-1.53451	-1.04731	-0.209491	-1.03102	-0.849008	-1.43125	-0.750527	-0.424898	-0.899899	-1.23101	-0.404078	-0.350494	0.0013021	-0.917664	-0.626965	-0.530333	-1.28174	-0.785113	-1.6101	-0.140205	-0.0425085	-0.549015	0.071888	-0.631282	-0.0299806	-0.290844	0.147819	0.0811516	0.296801	0.284605	0.0550462	0.57881	-0.475465	-0.413536	-0.204713	0.568622	0.0919141	-0.713302	0.367183	0.475431	6.91276e-07	linear_increasing	1.94706e-05	9.32591e-05
PSMB1	-	-0.0306745	-0.501879	0.218452	-0.392852	-0.94248	-0.576742	-0.0608886	-0.218979	0.0799936	0.0357659	-0.45173	0.47779	-0.305282	-0.32833	0.117599	0.194045	0.252119	-0.40084	0.535458	-0.177413	0.060467	-0.809132	-1.0839	-0.0705481	0.431203	-0.951612	0.802194	-0.275557	0.632365	0.420875	1.19446	1.27331	0.580805	0.723145	0.421115	0.694403	-0.1906	0.67402	0.500135	0.741181	0.661197	-0.110684	0.406359	0.484981	0.000101279	linear_increasing	5.85161e-05	0.000240831
ABRACL	-	-0.928731	-1.38014	-0.999061	-0.898383	-2.73881	-2.46362	-1.63235	-1.48408	-0.446346	-0.837463	-1.44895	-0.215274	-1.83736	-2.09088	-1.14364	-1.01259	-0.190511	-1.51759	0.257864	-1.86943	-1.15122	-1.99441	-3.26611	-2.85802	-0.800005	-3.22526	-1.52273	-1.22901	-1.12739	-0.186636	-0.0875108	-0.147635	-0.564174	0.413205	-1.0051	-1.26659	-1.38717	0.165782	-0.728584	-0.359267	-0.496705	-1.40794	0.603458	0.888342	0.0541801	other_trend	0.00465272	0.0100478
TIMP3	-	0.766604	3.05192	1.7199	1.73843	-0.570949	1.56682	0.759311	0.907934	1.68802	0.441806	1.96188	2.43493	2.50544	2.32582	1.67958	1.79842	3.63116	2.18834	0.776186	1.60321	0.510394	0.63095	2.33531	1.36025	0.716392	0.86175	1.76856	0.872019	1.02866	2.77887	5.84202	3.58932	6.57571	5.80949	5.52728	5.60924	5.92482	4.45915	5.91806	5.16543	5.44205	1.52793	0.853117	0.902581	4.02555e-06	linear_increasing	1.58474e-14	1.94301e-12
ASAH1	-	1.30098	1.01867	2.17209	1.91331	1.10656	1.05789	2.2613	1.94279	2.72233	2.59412	2.78954	2.64212	2.1345	1.88217	2.26808	2.32715	2.736	1.73736	3.43091	1.87145	2.3667	1.77615	0.150677	2.68137	2.71377	1.89308	1.90057	2.51523	2.51091	3.26061	2.62989	5.48074	2.95616	2.85482	3.31946	2.16092	2.73646	2.56133	2.52619	3.0602	3.02862	2.12261	0.919057	0.702369	0.000268071	linear_increasing	0.00230402	0.00553542
PRELP	-	4.77559	4.51915	4.81939	4.60634	3.7342	4.06207	3.79669	4.47413	5.18523	5.20555	3.7383	4.63425	4.50261	4.20953	4.14279	4.28967	5.40718	5.74422	3.46114	3.64709	3.83599	3.90135	4.66361	4.84525	4.88794	3.91214	4.47566	4.42206	4.29027	4.07892	5.26604	4.45916	5.52989	5.78029	5.41432	5.01023	4.58166	5.13351	4.5209	4.91737	5.06134	4.40894	0.44923	0.553461	0.0611493	other_trend	0.00175027	0.0043974
PARVA	-	-0.481221	-0.402064	0.146091	0.165129	-0.595238	0.298674	-0.155066	0.62262	0.773499	-0.170785	1.01041	0.204814	0.221697	-0.575344	-0.136394	0.805719	0.923828	0.39744	-0.213477	-0.0630227	-0.130927	0.500417	-0.4488	-0.0579244	-0.0554866	0.38582	0.00732024	0.10067	0.172087	0.364379	1.82225	0.894156	1.87304	2.13786	2.497	1.72544	0.608611	2.09635	2.17375	1.57189	1.74003	0.120495	0.586411	0.433812	8.17515e-06	linear_increasing	2.14235e-11	6.33478e-10
UGP2	-	1.64214	1.05871	1.29252	1.07651	0.862722	0.850652	1.04552	0.658018	1.0943	1.27839	1.03996	1.17107	1.21025	0.773945	1.21371	0.881081	1.44419	1.40036	1.49718	1.34187	1.42144	0.971912	0.446725	1.33996	1.51112	1.30852	1.06522	1.37376	1.19326	1.50019	1.53175	1.80108	1.72149	1.50251	1.25421	1.60062	1.06399	1.47304	1.44209	1.5459	1.49367	1.16551	0.212694	0.277156	0.00146573	linear_increasing	0.00153958	0.00394019
TSPO	-	-0.410924	-1.23569	-0.759698	-0.753183	-1.32275	-1.0647	-1.09362	-1.00684	-0.111865	-0.394286	-0.39826	-0.0661027	-1.25072	-1.72756	-0.556721	-0.180126	0.777036	-0.748682	0.244043	-0.359181	0.0672977	-0.510811	-1.96867	-0.25024	-0.315745	-0.513878	-0.925501	-0.72026	-0.608436	1.21369	0.686089	1.65849	1.0453	0.330398	-0.813615	0.335341	0.0572808	0.666605	0.565879	0.838613	0.537038	-0.565079	0.648467	0.66215	4.38313e-05	linear_increasing	4.87583e-05	0.000204615
ANXA5	-	4.89561	4.70309	5.41075	4.9891	4.70809	4.76872	5.06863	5.19075	5.37628	5.16729	5.37461	5.19998	4.78957	4.94844	4.87589	5.1611	5.14988	5.10342	5.66422	5.18669	4.98159	5.04728	4.05438	4.9344	5.10885	5.4261	4.55201	5.0339	4.86475	5.60486	5.7493	5.83464	5.48353	5.47593	5.79916	5.58012	5.25228	5.7634	5.47132	5.52551	5.59352	5.04467	0.187279	0.322473	0.000977763	linear_increasing	1.04532e-05	5.45954e-05
KPNB1	+	1.67381	1.34087	1.43223	1.41093	1.18847	1.20704	1.42203	1.26678	1.6208	1.86279	1.41987	1.52263	1.1912	1.14261	1.41188	1.61841	1.46832	1.41923	1.81632	1.67611	1.18414	1.48538	0.661258	1.33654	1.38127	1.44823	1.42786	1.39389	1.37039	1.62635	1.73949	1.73008	1.41937	1.57757	1.56545	1.663	1.34459	1.61721	1.62007	1.77663	1.60535	1.41425	0.138051	0.229215	0.128938	other_trend	0.0177821	0.0304881
DHX9	-	1.49483	1.07038	1.41525	0.9007	0.65947	0.84483	0.662721	1.0065	1.40173	1.26743	0.851361	1.42835	0.624258	0.406963	0.861907	1.36789	1.52748	1.19034	1.40331	1.11443	1.01992	0.438023	0.756999	1.0253	0.8574	1.21064	0.45943	0.646162	0.563131	1.65583	1.98525	1.51987	1.49075	1.50867	1.51364	1.71706	1.28692	1.62221	1.85272	1.55495	1.6052	1.00443	0.200116	0.359134	0.0167799	linear_increasing	1.29323e-05	6.55829e-05
FLOT2	-	-1.46844	-1.37877	-1.09532	-1.63017	-1.55626	-1.40947	-1.28722	-0.774825	-1.16866	-1.27618	-1.52523	-1.35648	-1.71588	-1.20298	-1.43494	-0.995624	-1.35976	-1.48675	-1.52243	-1.39769	-1.01238	-1.20632	-1.69074	-1.239	-1.2226	-1.20229	-1.23205	-1.2647	-1.50649	-0.762286	-0.663629	-0.734296	-0.854169	-0.782225	-0.898518	-0.549279	-1.00482	-0.647611	-0.794527	-1.23178	-0.816085	-1.31273	0.196576	0.234723	2.99924e-05	linear_increasing	5.49744e-07	4.42095e-06
APCS	-	3.44518	5.7005	5.17539	4.66001	4.00076	5.15944	4.35033	4.55999	5.22695	3.77298	4.86275	5.37309	4.95099	3.85905	4.83555	5.15637	5.63659	4.92738	4.33497	4.73915	3.42199	5.07379	5.30537	3.99505	3.98164	4.76537	5.16684	4.77299	4.40579	5.33779	5.69384	4.93665	7.2135	6.23769	7.09851	5.89739	6.55748	5.12283	6.5621	5.75889	6.10789	4.69847	0.76802	0.621329	0.000679893	linear_increasing	8.94718e-07	6.6653e-06
SUN2	-	-0.822723	-1.12092	-0.832988	-0.620449	-1.10938	-0.979515	-0.339796	-0.762534	-0.530667	0.00361614	-0.622237	-0.298123	-0.821885	-0.566496	-1.01726	-0.53486	-0.613303	-1.0219	-0.572654	-1.0167	-1.30822	-0.698288	-1.90802	-0.584607	0.0547275	-0.649054	-0.875047	-0.483971	-0.406628	-0.557734	-0.0597544	0.68557	-0.395442	1.03929	0.22758	0.411826	0.691561	0.0329432	0.0557806	0.508439	0.31978	-0.720588	0.428155	0.38331	5.76666e-05	linear_increasing	1.22566e-08	1.50046e-07
PSMA7	-	0.515048	0.277159	1.37993	-0.0512712	0.269844	0.655009	0.983596	0.435668	0.646507	0.769674	1.13127	1.22104	0.136283	0.472766	0.871958	0.846693	1.0151	-0.167339	1.69961	0.981803	0.668996	0.688772	-0.534771	0.826988	0.944942	0.344885	0.146335	1.2125	0.851244	1.3963	1.48353	1.69869	1.27848	1.40738	1.36554	1.2827	0.492351	1.20702	1.21434	1.69498	1.3125	0.687885	0.338617	0.498046	0.00244876	linear_increasing	0.000727409	0.00209607
G6PD	-	0.778987	0.182099	0.973437	0.189005	0.327723	0.231046	1.47098	0.456591	1.05445	0.717813	1.20854	1.34354	0.709765	0.796833	1.12839	1.33803	1.05416	0.490787	1.4511	0.469834	0.966724	0.390566	-1.33571	0.845265	1.47166	0.436687	1.03173	1.56441	1.13829	1.91529	2.00286	2.3534	1.11081	1.46266	1.17618	1.17607	1.62131	1.76599	1.74969	1.65102	1.607	0.826601	0.394397	0.611667	0.00040746	linear_increasing	0.000564591	0.00168763
MYL9	-	1.20858	2.37462	2.58101	2.20846	1.45118	1.89793	2.236	2.01823	2.64793	2.06646	2.18158	2.67477	1.48498	1.24819	1.75208	2.29278	2.78876	2.52696	2.15985	1.5718	1.30584	1.50847	0.743783	1.51288	1.63532	2.47367	1.52719	1.66845	1.81674	1.55528	2.37692	1.70535	2.16848	3.04983	3.81078	2.68682	2.73327	2.76442	2.92244	2.39129	2.66096	1.90399	0.564447	0.515241	0.140544	other_trend	0.000345998	0.00111205
HUWE1	-	-0.698402	-1.3583	-0.724016	-1.17846	-1.65726	-1.67447	-1.6193	-1.40172	-0.606022	-0.957956	-1.09881	-0.785245	-1.76731	-2.08527	-1.19017	-0.960474	-0.757712	-1.09922	-1.04758	-1.30998	-1.14547	-2.03099	-2.09222	-1.23762	-1.49213	-1.58981	-1.29298	-1.66272	-1.70248	-0.850332	-0.0615391	-0.34028	-0.509798	-0.575836	-0.561378	-0.607639	-1.50685	-0.332685	-0.361006	-0.434738	-0.529175	-1.30248	0.37944	0.421936	0.0265911	linear_increasing	8.64994e-06	4.69638e-05
VDAC2	-	2.42235	2.1888	2.32662	2.27005	2.03761	2.4529	2.09578	2.28311	2.32264	2.58348	2.3465	2.40583	2.17085	1.75755	2.14037	2.3944	2.42645	2.02465	2.62196	2.46529	2.03802	2.35006	1.21987	2.49658	2.417	2.47274	2.22512	2.17143	2.08424	2.80019	2.96499	2.91363	2.61938	2.41759	2.74429	2.97954	2.48587	2.90269	2.83488	2.68526	2.75481	2.26708	0.199309	0.289581	0.00269866	linear_increasing	1.6516e-05	8.03641e-05
HEBP1	-	-1.11521	-1.45621	-1.08333	-1.13165	-1.52906	-1.1086	-0.74777	-1.18464	-0.910577	-1.9584	-1.01799	-1.01671	-1.51135	-1.16481	-1.18254	-0.893662	-0.533337	-0.78844	-0.715551	-0.855475	-1.14764	-0.727427	-1.68787	-2.03416	-2.35675	-0.980009	-1.40703	-0.957086	-0.98123	-0.230273	-0.55258	-0.232652	-1.08277	-0.864438	-0.225353	-0.897446	-1.10059	-0.414168	-0.0504998	-1.33473	-0.675523	-1.14716	0.439556	0.449152	0.0150865	linear_increasing	0.00633025	0.0128749
ALDH1A1	-	3.25568	3.83234	4.26866	3.62806	3.09328	3.91181	3.24909	3.69483	3.374	3.67644	3.14483	3.506	3.28441	4.00521	3.04984	3.5119	4.05568	4.10183	2.96805	3.2923	2.85729	2.83718	3.24949	2.95773	3.63986	3.74689	2.86281	3.00779	3.33002	3.01871	3.99993	4.25392	4.52786	3.84587	4.38706	3.96402	3.99339	4.24021	4.34912	4.5796	4.2141	3.41373	0.252798	0.409515	0.0564586	other_trend	1.09183e-06	7.91883e-06
AK1	-	1.77169	1.75177	2.33564	1.81352	2.0087	2.59579	2.16869	2.4202	2.11649	2.72162	2.18732	2.16115	1.95903	2.3133	2.24823	3.03663	2.4856	2.00214	2.13302	2.49795	2.24449	2.42008	1.58671	2.52299	2.67018	2.41141	3.12531	1.83373	2.57027	2.24249	2.61147	3.44845	3.2309	2.87009	2.5082	2.72094	2.54672	2.82232	3.11072	2.99634	2.88662	2.27854	0.309613	0.362156	3.77825e-05	linear_increasing	2.8702e-05	0.000129801
SOD2	-	3.66609	3.49053	3.64863	4.06306	3.13039	3.06209	3.0003	2.97272	3.74812	3.62018	3.46605	4.02074	3.01921	2.74247	3.57386	4.09513	3.70537	2.98607	4.22156	3.28173	4.06196	3.0303	3.56013	3.09842	3.37201	3.26069	3.17156	3.12606	3.11905	4.1906	4.38231	4.81244	4.10757	3.83552	3.72416	3.98202	3.64703	4.14361	3.93894	4.6899	4.12635	3.45017	0.392499	0.422663	0.00993755	linear_increasing	7.17657e-05	0.000289131
VCP	-	3.70333	3.69794	4.03462	3.71037	3.56513	3.63558	3.8653	3.70049	3.78987	4.06355	3.85459	3.84326	3.53407	3.53363	4.01542	3.89621	3.71941	3.33247	4.04233	3.96431	3.67608	3.65095	2.8404	3.69562	3.61779	3.9008	3.9002	3.75974	3.78594	3.80732	3.8888	3.96033	4.01045	4.14974	3.84926	3.97282	3.659	3.96393	3.93886	4.02185	3.94151	3.73789	0.128024	0.240013	0.143862	other_trend	0.0149529	0.0263907
AOC3	-	3.14341	3.44919	3.52867	3.80757	3.0364	3.20933	3.08402	3.38623	3.9302	3.7613	3.44869	3.54306	3.44699	3.10752	3.55494	3.5794	3.91739	3.05535	2.80023	3.18297	2.8105	3.39749	2.26429	3.68475	3.77283	3.13722	3.36063	3.23198	3.67973	3.47622	4.64138	4.53093	4.86117	4.93398	5.02856	4.77181	4.40485	5.24673	4.93724	5.05467	4.84113	3.35962	0.257071	0.365903	2.91226e-05	linear_increasing	2.69082e-14	2.46274e-12
RAP1B	-	1.26266	0.9185	1.67144	1.6121	1.43199	0.725205	1.97448	1.08514	1.70634	1.72371	2.44974	1.56706	1.71773	1.93937	1.99229	2.25501	2.45245	1.43585	1.98392	1.71297	1.43403	1.72278	0.880478	2.21116	2.56209	1.67794	1.99339	2.09725	2.23063	2.06933	2.47336	2.40267	2.87749	2.73071	2.51214	2.50064	2.00651	2.58869	2.47633	2.78511	2.53536	1.7499	0.241938	0.468645	2.27176e-07	linear_increasing	1.1373e-05	5.87604e-05
PURA	-	-0.871811	-0.829823	-0.361274	-0.558933	-1.08499	-0.0749756	-1.03754	-0.108187	-0.572298	-0.515095	-1.14523	-0.74074	-1.45455	-1.39382	-0.852611	-0.716241	-0.496594	-0.504554	-1.12695	-0.901464	-1.12791	-0.482427	-1.3546	-0.769585	-1.04838	-0.413578	-1.08333	-0.607192	-1.32414	-0.725393	0.149257	-0.214634	0.0961342	0.221024	0.250872	0.771039	0.35788	-0.340547	0.521415	0.474663	0.22871	-0.809473	0.33367	0.365049	0.00232297	linear_increasing	1.34641e-09	2.33135e-08
DSTN	-	2.16103	1.80235	2.18706	1.87848	1.56074	2.05219	1.6188	2.12532	2.35038	2.35784	1.77371	2.51784	1.59037	1.72122	2.12169	0.870989	2.09986	2.20937	1.81675	1.26886	1.85217	1.25936	0.958243	1.81922	1.86228	1.85158	2.20988	1.99027	2.19608	1.90706	2.87205	3.29673	3.68081	3.12889	3.59985	2.91821	2.90211	3.40734	3.53207	2.73105	3.20691	1.86637	0.342193	0.393192	0.000149006	linear_increasing	9.9831e-12	3.42634e-10
TGM2	-	4.13828	4.74159	5.33432	4.64733	4.41818	4.78705	5.08032	4.4465	5.12005	4.98753	4.67589	5.41505	4.70374	4.27636	4.51971	4.81481	5.52034	4.25984	4.87571	4.50312	4.60056	4.32867	3.58751	4.69475	4.85137	4.17239	4.49111	5.30437	4.66458	5.21691	5.82141	5.1559	6.0063	5.84408	5.64363	5.6954	5.7382	6.11461	5.48808	5.81779	5.73254	4.70593	0.268765	0.428059	0.000414581	linear_increasing	1.81985e-08	2.08529e-07
PGAM1	-	1.45627	1.2741	1.31219	1.84967	1.28612	1.23817	1.76021	2.10798	1.8135	2.93023	1.35443	1.45634	1.38812	0.88209	2.09574	1.83598	1.95339	1.47737	1.91169	1.80458	2.11313	1.58723	1.55454	1.26974	1.52558	1.2283	1.38926	0.810411	1.53063	2.22565	2.56655	3.06378	3.61961	3.04169	3.49536	3.39314	3.08413	3.30481	2.70443	3.31905	3.15925	1.61409	0.335503	0.431451	2.41438e-05	linear_increasing	1.48367e-12	7.12903e-11
GNAI2	-	2.51512	2.12606	2.35962	2.2566	2.07127	1.7865	1.93457	1.88797	2.50066	2.15987	2.51878	2.24312	2.1108	1.9715	2.04231	2.64948	2.62497	2.29435	2.44757	2.34403	2.27379	2.21469	1.48048	2.7537	2.49476	2.1058	2.06754	2.62001	2.46469	2.695	3.20676	3.02034	2.58027	3.10704	2.98557	3.21916	2.6391	2.95662	3.05314	3.1698	2.99378	2.26719	0.221718	0.29608	4.24685e-06	linear_increasing	1.80112e-08	2.08529e-07
KIF5B	+	-0.69192	-0.767107	-0.127325	-0.587538	-0.853247	-1.08886	-0.917041	-0.723966	-0.118232	-0.306245	-0.198016	-0.042829	-0.889905	-0.67919	-0.788333	-1.00841	-0.0309715	-0.237557	0.103794	-0.397628	-0.635212	-0.768136	-2.0243	-0.676903	-0.245672	-0.255491	-0.99768	-0.444446	-0.507492	0.234865	0.438565	0.424705	0.533829	0.186674	0.463236	1.29817	-0.014174	0.811212	1.16945	0.805787	0.611746	-0.5557	0.411666	0.450698	8.159e-05	linear_increasing	1.17692e-08	1.45938e-07
COL6A6	-	0.645212	1.88808	1.25675	1.89906	1.4636	0.48204	1.5649	2.65468	3.52373	0.420445	3.51038	2.23042	2.41432	0.615328	2.19255	3.52676	3.34402	2.63032	1.38286	2.52853	1.50135	3.39939	0.488587	1.24203	2.53164	2.91686	2.3138	2.50456	2.71171	3.31285	3.71974	3.6634	6.0087	5.85739	4.22176	4.59269	3.77606	4.68869	3.5605	4.26634	4.43553	2.10323	0.879949	0.992125	9.33715e-07	linear_increasing	8.40538e-08	8.32739e-07
MAPRE1	-	0.496107	0.0452559	0.30076	0.282381	0.160082	-0.0397743	0.11184	0.30006	0.56101	0.113321	0.595838	0.561452	0.157544	-0.174731	0.390579	0.449339	0.630125	0.597148	0.484375	0.316052	0.196269	0.463972	-0.449689	0.226814	0.421869	0.382489	0.0792178	0.560353	0.378755	0.542692	0.431363	0.523754	0.616607	0.726306	0.577199	0.628231	0.470381	0.714329	0.665846	0.780773	0.613479	0.304717	0.113953	0.252457	0.00396436	linear_increasing	0.000644994	0.00189553
PGD	-	2.46711	2.2459	2.36894	2.31074	1.91491	1.5341	2.16522	2.04326	2.68872	2.05525	2.40858	2.59826	1.63235	1.93351	2.18711	2.18819	2.27472	2.28421	2.8375	2.39406	2.44004	1.9789	1.08444	2.09764	2.05865	2.59655	1.77637	2.19815	2.06974	3.17829	2.87688	3.96867	2.24254	2.78162	1.93038	2.7281	2.34723	3.35069	2.84943	2.90891	2.79845	2.20038	0.574141	0.401253	0.0104571	linear_increasing	0.000777041	0.00221583
AP1B1	-	1.33772	0.507492	1.15148	0.819975	0.440021	0.523654	0.0732803	0.549346	1.56853	1.04429	1.00484	1.03817	-0.103852	0.214049	0.734944	0.426489	1.50281	1.40292	1.62891	0.844869	0.692487	0.825757	-0.884875	0.801854	0.755177	0.502879	-0.01584	1.01677	0.543393	1.63526	1.71287	1.89243	1.48847	1.70451	1.68698	1.47309	1.1698	1.49601	1.39882	1.76669	1.57897	0.75276	0.212136	0.564636	0.00810102	linear_increasing	6.43974e-05	0.000261674
KANK2	-	0.124793	0.0294779	0.331848	0.333403	-0.406493	-0.03698	-0.429347	0.815787	0.590793	0.259907	0.0178126	-0.010234	-0.390195	-0.912693	-0.0162448	0.246175	0.35711	0.178773	-0.722821	0.0389751	-2.11739	0.432455	-0.424184	-0.352092	-0.264059	0.0549284	0.0240973	-0.134327	-0.00893312	-0.284505	0.938646	-0.15444	0.842062	0.665189	1.61748	0.634644	0.456008	0.724986	0.468348	0.60203	0.679496	-0.0891389	0.443931	0.535276	0.0986764	other_trend	0.000218273	0.000754534
B2M	-	2.02312	1.65278	2.03853	1.49749	1.46412	1.13843	1.76335	1.28729	1.75023	1.59602	1.60734	1.98873	0.654607	1.56683	1.82898	2.0697	2.50917	1.80363	3.01584	2.04045	1.85746	2.11227	0.715315	1.53875	1.37514	1.64277	1.35805	1.74178	2.2017	2.12222	2.07879	1.92449	1.968	2.2642	2.23274	2.61731	2.55026	2.07188	2.79742	2.72598	2.32311	1.73207	0.324016	0.473671	0.00657232	linear_increasing	0.000773751	0.00221276
SURF4	-	0.21405	-0.474544	-0.224307	-0.159681	-0.340655	-0.175413	0.158505	-0.365502	0.160855	-0.00866429	-0.0696748	-0.0678232	-0.554258	-0.516886	-0.129614	-0.555096	0.532478	-0.300645	0.406663	0.199121	-0.0938973	-0.635295	-0.99581	-0.397321	0.166158	-0.102952	-0.455999	0.172618	-0.444806	0.880891	0.65596	0.580258	0.336163	0.478778	-0.332152	0.380873	0.606113	0.501984	0.409636	0.253651	0.387126	-0.13925	0.282339	0.389339	0.00336058	linear_increasing	0.000347643	0.00111548
TXN	-	2.26845	2.31001	2.4418	2.4035	1.99297	2.16289	2.19357	2.51771	2.36133	2.58142	1.89421	2.24301	1.69537	1.84724	1.93058	2.25128	2.91254	2.49673	2.32619	1.96529	2.56725	1.63238	1.26934	2.21603	1.97113	2.04161	2.21812	1.88689	1.77662	2.36851	3.28245	3.47261	3.12507	3.33451	2.87662	2.92531	2.79497	3.68293	2.98477	2.98305	3.14623	2.15813	0.288019	0.337546	0.00142656	linear_increasing	4.79046e-10	9.79496e-09
S100A9	-	0.19854	3.76191	2.7969	3.20326	1.41423	2.47316	2.29346	1.54621	1.40072	2.20958	1.16571	2.34132	2.7518	4.31614	1.80898	-1.02975	2.52539	0.855099	4.13972	1.18091	3.70218	1.65241	3.01815	2.11915	0.0693637	1.09314	1.778	2.72969	1.44171	5.34774	4.92819	3.43222	0.595664	4.97417	3.48789	4.32178	3.43015	5.46922	3.70585	5.22919	3.95743	2.14349	1.42013	1.34665	0.0137035	linear_increasing	0.000806359	0.00227915
SEPTIN7	-	1.79343	1.58075	1.89147	1.7004	1.53306	1.52	1.21715	2.02716	2.22366	1.90403	1.84959	1.78425	1.34333	1.0875	1.45346	1.72728	2.5305	1.8407	2.03548	1.63801	1.41988	2.0254	0.96733	1.67477	1.70208	1.9761	0.900231	1.7883	1.55051	2.00348	2.56146	2.147	2.23625	2.45169	2.51416	2.58564	2.39323	2.40644	2.41232	2.36371	2.40719	1.68964	0.136666	0.359687	0.00162438	linear_increasing	3.91797e-07	3.34682e-06
LGALS3BP	-	-0.958872	-0.559562	0.383951	0.206488	-0.539764	-0.207035	0.0486962	-0.218063	0.0766109	0.233182	-0.130674	0.193414	-0.533382	0.0856104	-0.172055	-0.467473	-0.359192	-0.296517	-0.0834896	-0.32421	-0.196816	-1.35821	-0.843656	-0.12286	0.171641	-0.379729	0.129255	-1.68874	-0.837176	-0.147066	-0.00082632	0.748287	0.326127	0.226987	0.813929	1.47611	0.145389	-0.0128643	0.154453	0.929974	0.480756	-0.296523	0.489664	0.474439	0.0665941	other_trend	7.22076e-05	0.000289131
CYFIP1	-	0.581168	0.00350648	0.324576	0.16487	-0.165723	0.098306	0	0.146585	0.641267	0.192142	-0.00150544	0.564572	-0.681308	-1.81606	-0.129423	-0.171908	0.743735	0.0919117	0.255868	0.298215	0.409086	0.382693	-1.06845	0.0902421	0.426107	0.387751	-0.286316	0.141044	-0.203841	0.995535	1.87445	1.22695	1.2603	1.351	0.949393	1.35614	0.389885	1.33911	0.909783	1.14237	1.17994	0.0804883	0.384187	0.543169	0.000838975	linear_increasing	7.71704e-07	5.90922e-06
AMBP	-	-3.18194	0.00045376	-0.243201	-0.0161358	-1.29949	-0.989479	-0.736036	-1.85377	-0.641067	-0.336946	-0.0923307	-0.337414	-2.81945	-0.855162	0.0965778	-0.468994	1.18639	0.00278552	-1.59112	-2.8238	-1.83758	-1.0601	-0.377779	-0.0947034	-0.0694021	-3.04672	0.0350581	-0.515712	-0.491958	0.114439	1.6213	0.544762	2.68615	1.9124	3.08272	0.72069	2.45119	2.17277	2.43318	1.02876	1.86539	-0.811486	0.864851	1.06684	4.29344e-05	linear_increasing	1.45516e-08	1.73391e-07
COL6A1	-	6.48069	6.09139	6.56268	6.69102	6.18993	5.89319	6.06047	6.44363	7.29464	6.52345	6.61552	6.65943	7.13965	5.9053	6.71554	6.47152	7.4019	6.7717	5.42891	6.34202	5.19467	6.11916	5.95803	6.44975	6.76435	6.36496	6.58628	6.3989	6.44681	6.37271	7.1524	6.29955	7.11362	7.35436	7.37531	7.12463	6.71121	7.01411	7.14395	7.1053	7.03944	6.41127	0.31773	0.471336	0.0269295	linear_increasing	0.000367045	0.00116221
EHD2	-	3.94901	3.76208	4.09127	3.88391	3.92767	4.03925	3.71214	4.05864	4.3036	4.34786	4.03511	4.03613	3.67078	3.56279	3.98032	4.72827	5.03377	4.46004	3.48128	4.09854	3.92466	4.67331	3.46021	4.33121	4.55489	4.19653	3.96845	4.3519	4.21168	4.71411	6.00332	5.53686	5.91096	6.21887	5.93053	6.44147	5.43759	6.1152	6.00286	6.17259	5.97702	4.11831	0.302611	0.382617	3.83281e-08	linear_increasing	1.62075e-16	4.49782e-14
SELENBP1	-	1.20544	1.24163	1.88032	1.66506	1.56823	1.19293	2.05529	1.98161	1.43901	1.85927	1.66473	1.6622	1.56115	1.85183	1.51975	1.73148	2.14972	1.65957	1.08537	2.16114	1.62577	2.21203	1.19919	2.22919	1.88819	1.43027	1.97386	2.17296	1.97161	2.02362	2.77737	3.47014	3.55774	3.50247	3.10978	3.3219	3.10236	2.7061	3.57741	3.19228	3.23175	1.72875	0.312683	0.337016	9.17995e-09	linear_increasing	5.97825e-15	1.01168e-12
ACTN4	+	5.6067	5.67212	5.97072	5.85303	5.71154	5.72572	5.68388	6.01077	6.19751	6.06695	5.98492	5.97959	5.41509	5.34128	5.73578	6.13257	6.15054	5.91422	5.76763	5.97442	5.71597	6.13098	5.06765	5.69071	5.93095	6.00903	5.64514	5.94543	5.74517	6.26326	6.44745	6.02666	6.06789	6.49196	6.91149	6.60712	6.10662	6.42444	6.65322	6.39672	6.41336	5.83464	0.281645	0.265604	0.000514428	linear_increasing	8.29046e-07	6.27334e-06
PGM2	-	0.303201	0.0968154	0.418047	0.183202	-0.0815189	0.461365	0.163679	-0.0194551	0.519105	0.594476	0.164684	0.278564	-0.130404	-0.0746586	-0.498232	-0.343555	0.0755799	-0.0518307	1.03104	-0.113716	0.607676	-0.0983361	-0.612666	0.216891	0.359258	0.160091	-0.394573	-0.396133	0.0579546	0.726918	0.0452486	1.82682	0.496128	0.678155	0.652926	0.29663	0.340038	0.979939	0.685012	0.421619	0.642251	0.120115	0.489636	0.377135	0.0693454	other_trend	0.00114915	0.00308472
S100A8	-	0.346376	2.7724	2.52229	2.48389	1.24556	1.42736	1.56614	0.76485	1.588	1.33439	1.07535	1.69469	2.2538	3.45142	1.43382	1.31886	2.01902	0.653775	2.98847	-0.102296	2.73686	1.2433	2.02132	1.72442	1.21395	0.42092	1.70904	1.68141	1.55534	5.08692	5.23755	3.58995	0.869308	5.18641	3.18182	4.4099	3.69454	5.59071	4.00362	5.55807	4.13219	1.74105	1.43846	1.02351	0.00036354	linear_increasing	1.19009e-06	8.40937e-06
PDCD6IP	-	1.50062	1.5491	1.64891	1.42215	1.30543	0.621137	1.26446	1.56881	1.60219	1.48666	1.40459	1.58435	1.37366	0.746749	1.4471	1.85469	2.0054	1.51942	1.59818	1.63252	1.31815	1.56282	0.500501	1.32059	1.43493	1.58302	1.08758	1.41747	1.63507	2.02929	2.33801	2.51127	2.30723	2.45978	2.32721	2.34245	1.81058	2.30175	2.10655	2.35799	2.28628	1.43419	0.197946	0.339756	2.69922e-05	linear_increasing	5.59588e-09	8.02632e-08
ANXA3	-	1.35258	1.54757	1.72975	1.49391	1.95306	1.56421	2.3286	1.73941	1.91419	2.34762	2.15291	2.09697	1.15028	2.16682	2.32688	3.04362	3.54022	2.48359	2.54481	2.59691	2.28054	3.02655	-0.151659	2.60205	2.79457	2.71364	2.47637	2.77791	2.55307	3.78257	4.92668	3.91614	4.5154	4.86748	4.44866	4.87207	4.2281	4.59905	5.03722	4.89932	4.63101	2.23098	0.358927	0.758111	1.01645e-09	linear_increasing	1.05966e-11	3.5115e-10
CLU	-	3.27219	4.31201	3.79562	3.5148	3.28621	3.63646	3.06017	3.93658	3.92156	3.51446	3.06659	3.84441	3.61619	3.16497	3.13642	3.31899	4.02592	4.19932	2.93245	3.09609	3.06142	3.41407	4.1321	3.26735	3.15097	3.55726	3.56825	3.07835	3.01195	3.15345	3.72893	2.84149	4.77626	4.07302	4.85541	4.28828	4.20698	4.03409	4.32062	4.2746	4.13997	3.46822	0.564177	0.396631	0.162772	other_trend	0.00017448	0.000616453
TUBB	-	3.80494	3.01517	3.51436	3.50179	3.40649	3.48133	3.41223	3.69659	3.94061	3.92184	3.88393	3.79014	3.37667	2.81228	3.52968	3.94688	3.89521	3.63327	3.95341	3.43715	3.92525	3.4864	2.54107	3.38211	3.54267	2.96693	3.56075	3.735	3.60888	3.73522	3.9327	3.73143	4.00135	4.00495	4.28378	3.56191	3.88099	4.09922	3.87538	3.77371	3.91454	3.54794	0.201896	0.348258	0.0432462	linear_increasing	0.00326135	0.00739188
CAV1	-	2.17577	2.43901	3.03331	2.58372	2.65545	2.39231	2.65976	2.48957	2.69366	2.64428	3.02848	2.76226	2.59108	2.31891	2.93771	2.62994	4.01933	3.01114	2.66174	3.08022	2.59768	3.94044	1.22579	3.15388	3.43228	3.31031	2.3543	3.33065	3.05464	3.26378	4.37587	3.77125	3.75864	4.30438	4.35916	4.63897	4.55317	4.4063	4.50809	4.79849	4.34743	2.81571	0.340182	0.535735	3.74798e-07	linear_increasing	2.95637e-10	6.38443e-09
MYL12A	-	2.38101	2.79687	3.37875	2.88296	2.88723	2.31664	3.483	2.77912	3.2821	3.30372	3.61225	3.49152	2.8391	2.94949	3.05189	3.24	3.89033	3.19591	3.77501	3.14394	2.80941	3.07873	1.78114	3.00258	3.10353	2.81942	2.80593	3.36275	3.4065	3.49356	3.72403	3.0511	2.73012	3.95496	4.40102	4.22727	3.50517	4.06311	3.47273	3.95274	3.70823	3.07815	0.525083	0.440969	0.00364162	linear_increasing	0.000618658	0.00182933
PPP1CB	-	0.608626	0.44676	0.801844	0.396433	0.140469	0.095952	0.052737	-0.5739	1.02068	0.13702	0.457499	0.861414	-0.265406	-0.154047	0.420752	-0.758611	1.13177	0.486186	0.524665	0.167556	0.585812	0.545759	-1.34456	0.363665	0.615032	0.175241	-0.258664	0.0378447	0.711372	0.937805	2.265	1.83692	1.84942	2.05153	1.78016	1.92771	1.38353	1.99665	1.84214	2.05595	1.8989	0.278923	0.231323	0.542041	6.71417e-05	linear_increasing	4.20068e-11	1.13714e-09
ACTR1A	-	1.22669	1.02345	1.25677	0.864786	0.924267	0.757058	0.874309	0.600184	1.49829	1.18217	0.951418	1.32705	0.484115	0.656192	1.21707	0.974171	1.42268	1.34049	1.18942	1.08207	0.90993	0.924297	-0.280996	1.08466	1.24768	1.35442	0.887159	1.15361	1.18783	1.57492	2.06842	1.84138	1.71497	2.12759	1.92931	1.83291	1.20157	1.86715	1.90001	1.92867	1.8412	1.02987	0.253493	0.360124	9.48057e-05	linear_increasing	9.29053e-08	8.97306e-07
NCL	-	2.4638	2.49964	2.73728	2.43257	2.0963	2.06	2.08083	2.14986	2.456	2.62788	2.25146	2.68856	1.86415	1.47049	1.90907	2.31878	2.84328	2.26726	2.89534	2.08087	2.22271	1.93486	1.53977	2.1644	2.05437	2.11867	1.83055	2.15101	1.85555	2.40937	2.66315	2.61629	2.32968	2.89339	2.9387	2.63759	2.51818	2.78237	2.48215	3.08649	2.6948	2.21582	0.230983	0.34882	0.20996	other_trend	0.000251782	0.000854992
BGN	-	4.76204	4.54769	5.03786	4.55691	4.31118	4.16701	4.07019	4.27708	5.4859	4.32053	4.31149	4.73239	4.22904	3.52055	4.50049	4.301	5.42073	6.21937	3.72897	3.8922	4.05144	4.40152	4.32805	4.29155	4.82875	4.65019	4.20626	4.69543	3.94495	4.56393	5.84223	4.50415	6.24992	6.18618	6.0686	5.69882	5.26813	5.89407	5.1504	5.72777	5.65903	4.47849	0.541104	0.541891	0.0033254	linear_increasing	6.29311e-07	4.99809e-06
COL4A2	-	2.93628	2.46753	2.53674	2.19602	2.78224	2.48981	2.9037	2.74614	3.14596	2.53546	3.26667	3.0195	2.01427	1.66968	3.14274	3.92269	4.34354	3.32616	2.22047	3.23581	2.65616	3.96254	1.95466	2.69207	3.63169	2.86351	3.26915	3.24531	2.7197	3.54448	5.16901	4.819	4.95091	5.08165	5.56025	5.65514	4.4067	5.05379	5.54742	5.4029	5.16468	2.91469	0.388615	0.614922	1.98979e-07	linear_increasing	3.65597e-13	2.00765e-11
CCT6A	-	0.516223	0.6085	0.94087	0.65517	0.156617	0.345964	0.701415	0.576485	0.694829	0.905761	0.468447	0.878028	0.107803	-0.151268	0.19651	-0.536453	1.02482	0.424161	1.03919	0.357275	0.82609	-0.270899	-2.90317	0.856499	0.490892	0.858272	0.290026	0.611247	0.491383	1.37506	1.31222	1.22843	1.22769	1.31646	0.937128	1.18158	0.523328	1.19878	1.04517	1.12559	1.10964	0.417858	0.236388	0.748773	0.0944712	other_trend	0.00697996	0.0139858
ITGB1	-	1.92942	1.87785	2.06233	2.2159	1.97643	1.5898	1.67539	2.04919	2.51265	2.22324	2.18363	2.28144	1.80812	1.53724	2.17492	2.58849	2.77318	2.00998	1.66292	2.32301	1.82939	2.48321	1.20542	2.1527	2.2235	2.34339	1.67378	1.88724	1.77297	2.10671	3.34818	3.13565	3.25355	3.50506	4.01881	3.67973	3.11256	3.48797	3.48018	3.6673	3.4689	2.03778	0.276284	0.34445	1.16263e-05	linear_increasing	2.24247e-14	2.26844e-12
LAMA5	-	2.98623	3.02875	2.69866	2.32409	2.90124	2.40571	2.73133	2.40418	3.0341	2.67204	3.21714	3.13365	2.03366	1.71496	3.47759	3.87662	4.13828	3.66667	2.58115	3.36234	2.85869	4.2156	1.70869	2.93792	3.46555	3.36134	2.53333	3.81552	3.19244	3.819	5.1093	4.40375	5.50545	5.48346	5.89532	5.49614	4.67113	5.22717	5.10823	5.70726	5.26072	3.00988	0.459027	0.649804	1.21931e-07	linear_increasing	2.55452e-12	1.1377e-10
SEPTIN2	-	2.12534	1.89927	2.23705	1.87544	1.92042	1.37671	2.06139	2.06881	2.19022	1.9755	2.02479	2.176	2.09995	1.7863	2.04082	2.00816	2.57595	2.20882	2.05418	2.42485	1.6908	2.27753	1.13232	1.91882	1.94092	2.23267	1.37741	2.10117	1.96598	2.03531	2.64996	2.20001	2.73862	2.87648	3.01956	2.48752	2.30719	2.66789	2.69075	2.40029	2.60383	1.99343	0.254984	0.297928	0.00162556	linear_increasing	1.0792e-06	7.88678e-06
MYO1C	-	2.85095	2.50512	2.8735	2.67755	2.72181	2.55117	2.23922	2.46373	3.22142	2.58397	2.73714	3.0799	2.26201	1.97796	2.79374	3.08587	3.8566	3.28575	2.52422	2.99662	2.45647	3.32086	1.23185	3.03775	3.33713	3.36461	2.40908	3.00548	2.85521	3.69812	5.14353	4.26998	4.8743	5.15764	4.74901	4.96997	4.03529	4.95817	4.78965	4.92046	4.7868	2.80016	0.363091	0.523352	2.95354e-07	linear_increasing	1.73736e-13	1.19257e-11
CLIC1	-	2.30692	2.12508	2.24423	1.96197	2.0399	1.64798	2.26898	1.79237	2.17618	2.20125	2.3492	2.22159	1.91018	1.9221	2.25928	2.29838	2.44457	2.05491	2.61469	2.22895	1.63196	2.00943	0.585893	1.99919	2.39555	2.38229	1.73055	2.31029	2.4063	2.5867	3.05748	3.36757	2.74341	3.30523	3.07544	3.23946	3.0934	3.21188	3.16673	3.17982	3.14404	2.10356	0.172151	0.382824	3.22126e-05	linear_increasing	5.13306e-10	1.02768e-08
GSTP1	-	4.16798	2.43257	4.10319	2.03024	2.69871	2.70912	2.90485	2.79351	3.65919	3.02823	2.88705	2.87025	2.21546	3.72961	1.70291	2.54988	3.52066	4.60064	4.30295	2.71143	0.806784	1.70305	3.8226	4.1959	3.13184	2.08842	1.1987	3.66193	2.96433	2.40492	3.61715	5.72076	4.54901	4.16956	5.73983	4.56241	5.02612	3.86616	4.85551	4.48993	4.65964	2.9199	0.704945	0.93727	0.00688431	linear_increasing	4.19979e-06	2.49907e-05
VWF	-	1.28173	0.576732	0.547081	0.722684	0.447494	-0.0183098	-0.396352	0.405255	0.787446	0.513812	0.0934274	1.16584	1.04496	0.271923	0.684117	-0.0854211	1.74593	0.63664	0.542724	0.79045	0.172558	0.833296	-0.766864	0.354937	1.07696	0.695293	0.209057	0.147048	0.65878	0.515429	2.41736	1.49591	4.51097	3.74904	2.88766	3.79808	2.57789	3.71186	3.21673	4.11441	3.24799	0.521822	0.910081	0.500434	2.8425e-05	linear_increasing	1.71858e-14	1.94301e-12
PGM1	-	1.34744	1.00479	1.53536	1.34099	1.21528	1.3604	1.4112	1.37309	1.54961	1.49586	0.978712	1.40187	0.901681	0.593418	1.45928	1.35879	1.67504	1.44945	1.56328	1.43053	1.0636	1.569	0.559336	1.18005	1.19156	1.05861	1.07635	1.10414	1.32942	1.7666	1.87073	2.46296	2.01127	1.9617	2.48641	1.75466	1.6157	1.5652	2.29318	1.7635	1.97853	1.27816	0.333906	0.286431	0.000600587	linear_increasing	1.4726e-07	1.36074e-06
FSCN1	-	2.09777	0.246485	0.629313	0.419304	0.451343	0.682168	0.955137	-0.552133	0.528887	0.427893	0.877443	0.769453	0.325909	0.16626	0.356534	0.671019	1.62688	0.77357	0.947638	0.269226	0.506869	1.39509	-1.42441	0.19454	0.441756	0.898879	0.0170322	0.435582	0.606141	1.19855	2.50811	1.5112	1.67905	2.61062	1.87791	2.20737	1.44727	2.13196	1.96019	2.3068	2.02405	0.564671	0.400518	0.626226	0.00120617	linear_increasing	3.55464e-08	3.81677e-07
SPTBN1	-	4.26079	4.14565	4.44784	4.15809	4.36446	3.97073	4.56245	4.32228	4.60944	4.39536	4.68731	4.20508	4.01383	4.19347	4.35552	4.80374	5.4037	4.91383	4.11157	4.66133	4.10057	5.17214	2.4739	4.50288	4.86537	4.95535	4.04449	4.75475	4.55103	5.10411	5.87316	5.16384	5.60048	6.01321	5.83294	5.97144	5.67091	5.86547	5.70253	5.83428	5.75283	4.43704	0.24385	0.524171	5.48355e-06	linear_increasing	3.64735e-09	5.52873e-08
CES1	-	2.60162	2.72384	2.93025	3.10922	2.98384	3.09088	3.41269	3.78319	3.96492	3.76529	4.0878	3.06484	3.41082	3.08586	3.15511	3.07277	3.4588	2.80951	2.59062	3.41265	2.00886	3.1823	1.34613	3.45425	3.52634	2.85849	3.13844	3.27414	3.33378	2.71862	3.58992	4.74371	3.98163	4.06375	4.03957	3.24559	3.42229	3.85604	4.01646	4.30653	3.92655	3.11186	0.433479	0.547792	0.023601	linear_increasing	0.000127217	0.000464848
MYH14	+	0.911346	0.586053	1.97293	0.710067	1.39293	0.92761	1.30765	1.51439	1.69883	1.76895	1.68304	2.01871	0.393266	0.264933	1.05996	1.68962	2.63477	2.28167	2.03572	1.81522	1.16789	2.0208	-0.858735	1.31618	2.07564	2.04999	-0.0262631	1.93083	1.05631	2.83103	4.38333	3.60793	4.27831	4.3902	3.73954	4.59453	2.91188	4.55226	4.09571	4.41882	4.09725	1.40771	0.530269	0.807849	1.85127e-06	linear_increasing	5.9327e-12	2.19282e-10
SFTPA1	-	2.96366	0.960292	4.29696	1.76278	3.58096	3.24571	3.4165	4.33587	3.51976	5.37006	3.67079	4.35917	2.89829	3.65761	3.73815	4.26714	6.10461	3.00812	2.99339	3.58951	3.30022	3.72818	1.83013	4.142	4.87396	3.89518	4.6022	4.42091	4.78628	5.08638	5.82412	4.57749	6.73769	6.33274	5.07996	6.54622	3.84568	6.35963	6.13873	5.52147	5.69637	3.74683	0.939915	1.07476	2.66662e-06	linear_increasing	9.3497e-06	4.97339e-05
EFEMP1	-	1.10144	0.949846	1.64084	1.21789	1.0924	1.08019	1.02209	0.616673	1.94058	0.565261	1.21336	1.67942	1.44807	1.45635	1.20172	2.34165	1.72879	1.80283	0.478521	1.08503	-0.136616	1.66962	2.01743	1.33854	1.05312	1.87254	0.27207	1.38508	0.357053	1.15667	2.00374	0.972461	2.63868	2.92409	3.7482	1.75228	2.00414	1.69261	2.46472	1.35434	2.15553	1.22162	0.811087	0.563721	0.0141007	linear_increasing	0.000241629	0.000824887
IQGAP1	-	3.58775	3.24977	3.79303	3.46823	3.48485	3.20907	3.10502	3.32525	3.96411	3.9445	3.52156	3.8631	3.12148	3.0297	3.52303	3.57234	3.84368	3.7143	4.06998	3.47754	3.77085	3.40442	2.44236	3.67667	3.87816	3.59458	3.24176	3.46508	3.43321	4.30103	4.40432	4.33619	3.85062	4.23469	4.17605	4.06031	3.84821	4.19628	4.18099	4.31896	4.16066	3.53588	0.190456	0.366399	0.00047986	linear_increasing	8.71096e-06	4.70294e-05
CAPN1	-	2.07613	2.21999	2.33201	1.90413	2.05358	2.00531	2.06855	1.96502	2.46935	2.21891	2.09773	2.23875	2.03049	2.05757	1.93606	2.3469	2.23123	2.36581	1.82838	2.10656	2.14403	2.14475	1.35847	2.19026	2.00764	1.89484	2.29356	2.19091	1.98681	2.42762	2.59017	2.25297	2.09616	2.61474	2.43353	2.10016	2.09498	2.59616	2.27844	2.55807	2.36154	2.10638	0.222044	0.215014	0.0561619	other_trend	0.00259314	0.00610786
GLUD1	-	2.41977	1.68228	2.26793	1.96334	1.92408	1.49904	1.55557	1.63897	2.16875	2.28707	2.24932	2.36671	1.44491	1.47697	1.84179	2.34748	2.56613	2.3756	2.15575	1.85027	1.62743	2.15003	1.12713	1.52878	2.22303	2.48907	0.989183	1.78431	1.88266	2.38135	3.00992	3.27507	3.01403	3.16843	2.63865	3.05377	2.86017	3.07751	2.86972	3.15977	3.0127	1.94216	0.183859	0.416861	0.000279069	linear_increasing	1.97733e-09	3.24823e-08
NID1	-	2.61556	2.36417	2.48354	2.68504	2.71072	2.54736	2.46654	2.58687	3.00154	2.85315	2.92116	3.00142	2.34033	1.27791	2.85695	3.44448	3.70094	2.91117	2.43429	2.99194	2.43627	3.4196	0.943499	2.56842	3.19031	2.7781	2.65311	3.51274	2.89458	3.44038	3.94037	3.59154	4.26693	4.62556	4.11748	4.6155	3.85035	4.4443	3.9757	4.69902	4.21267	2.7344	0.377465	0.575191	8.01878e-06	linear_increasing	4.25949e-09	6.39589e-08
ACTC1	+	6.67331	6.83469	6.74678	7.05303	6.28169	6.34428	5.98584	6.4384	7.08113	6.27045	6.49715	6.79113	6.16884	5.97569	6.30368	6.32272	6.53214	6.96168	5.56284	6.12492	6.02531	6.13238	5.66988	6.04065	6.32838	6.34255	6.14101	6.08817	6.42091	6.20885	6.78334	6.52918	6.45834	7.2657	8.31734	7.18894	8.04094	7.43951	7.68585	6.33374	7.20429	6.34495	0.681287	0.371149	0.092657	other_trend	1.0508e-05	5.47328e-05
YWHAZ	-	5.11308	4.87371	5.03985	4.898	4.8032	4.28749	4.80911	4.60974	5.07502	4.94624	5.05175	5.07451	4.76971	4.44019	4.87355	5.01574	5.33183	4.74237	5.2989	5.02616	4.39067	4.93539	3.88226	4.72658	5.10897	4.82003	4.20594	4.69113	4.94584	5.28455	5.25508	5.43049	5.02514	5.42037	5.84771	5.55669	5.63149	5.48626	5.56908	5.50043	5.47227	4.83572	0.21993	0.331443	0.00431329	linear_increasing	1.73472e-06	1.16172e-05
DNM2	-	0.843078	0.254675	0.879299	0.38067	0.515218	0.672186	0.640124	0.485889	1.03209	0.887994	0.725199	0.974747	0.0586237	-1.36238	0.705742	0.462166	1.09737	0.597148	1.10658	1.18204	1.06159	0.955513	-0.702012	0.548692	0.843606	0.621123	0.76779	0.647758	-0.0977889	1.46752	1.60915	1.52615	1.47821	1.42074	1.01948	1.38918	0.663848	1.62519	1.46594	1.28691	1.34848	0.608408	0.297086	0.561376	0.00896998	linear_increasing	0.00031408	0.00102908
EHD1	-	2.09268	1.56044	1.46429	1.52212	1.42246	0.888811	0.622001	0.877796	1.48751	1.18968	1.10937	1.70056	0.805897	0.267745	0.936148	1.73314	2.15023	1.77509	1.47087	1.68559	1.37479	2.13113	0.211228	1.05344	1.36271	1.84885	0.994848	1.43225	1.34886	2.01521	4.13442	3.06202	3.80508	4.25851	3.30274	3.67418	3.12864	4.20791	3.47148	3.98907	3.7034	1.35119	0.446876	0.504752	2.63471e-06	linear_increasing	1.14056e-15	2.43572e-13
COL12A1	-	-0.106239	0.465976	0.873103	1.0795	0.58847	0.570596	0.667586	-1.28047	0.995074	0.106157	0.869205	1.3351	0.433825	-0.55608	0.840741	0.735046	2.37366	1.78988	-0.511675	0.102103	-0.775411	1.4768	-0.171815	0.0216452	1.33761	1.24339	0.512167	0.834313	0.390072	1.31836	3.80064	2.04196	3.65809	3.82166	2.85649	2.94985	0.607179	3.32637	2.19049	4.18009	2.94328	0.58529	1.08208	0.788419	3.72897e-05	linear_increasing	6.13698e-09	8.673e-08
PPP2R1A	-	2.06341	1.58895	1.84458	1.66316	1.67811	1.51319	1.60915	1.4635	2.00729	1.91451	1.7866	1.84	1.57425	1.18464	1.62769	1.80485	1.86238	1.67623	1.7747	2.02661	1.6883	1.72174	0.430981	1.79004	1.86966	1.76771	1.69963	1.76593	1.73559	1.99601	2.37874	2.16456	1.96305	2.40234	2.11963	2.09269	2.14392	2.68947	2.03875	2.44865	2.24418	1.69898	0.225905	0.300361	0.00395242	linear_increasing	6.09898e-06	3.52019e-05
ANXA1	-	4.85913	4.96698	5.34924	5.02809	5.01095	5.0811	4.60735	5.2922	5.24666	5.58007	4.93701	5.19469	4.6919	4.66964	4.71943	4.98335	5.27153	5.17111	5.33846	5.10939	5.394	4.97162	4.33108	5.03352	4.93841	5.15066	4.63572	4.96495	4.70842	5.50859	5.58545	5.48515	5.33984	5.57761	5.68832	5.54648	5.50261	5.65837	5.58281	5.43721	5.54038	5.02484	0.103494	0.289585	0.00437269	linear_increasing	3.00096e-06	1.87268e-05
ANXA2	-	6.71734	6.57611	6.67804	6.7165	6.80965	6.31973	6.3232	6.67504	6.87282	7.08642	6.80257	6.70275	6.45513	6.37795	6.66362	6.68552	7.53138	6.97356	7.08353	6.8734	6.91261	7.09376	5.44819	6.88488	7.04188	7.08448	6.27927	6.79975	6.64975	7.3741	8.16253	8.19236	8.16117	8.42414	8.14533	8.23577	7.94867	8.15826	8.12064	8.13098	8.16799	6.74976	0.116998	0.382798	4.17089e-07	linear_increasing	6.96309e-14	5.57628e-12
ANXA4	-	2.57383	2.50697	2.95016	2.50106	2.67079	2.75569	2.54549	2.68986	3.07875	3.18662	2.74614	2.81538	2.50219	2.53857	2.73328	2.79422	2.99939	2.71737	2.95652	2.86432	2.31742	2.39288	1.17964	2.89036	3.1612	2.4041	2.17204	2.75684	2.6262	3.17678	3.69626	3.42082	3.40469	3.68046	3.58834	3.33321	3.28829	3.64447	3.12102	3.59996	3.47775	2.67347	0.19334	0.38143	0.000926958	linear_increasing	1.81958e-07	1.64189e-06
MYH10	+	3.57196	3.96415	4.1404	3.70144	4.15119	3.80896	4.05719	4.41625	4.66836	4.04545	4.65721	4.30308	3.90372	4.09909	4.2713	4.66956	4.6138	4.71393	3.42165	4.27924	3.68371	4.66602	3.49635	3.72107	4.11625	4.87977	3.59779	4.19609	4.04189	4.3698	4.86836	4.18829	5.0637	5.12532	6.36236	5.48549	5.0538	5.13469	5.59941	5.23226	5.21137	4.14089	0.555297	0.404609	0.000237242	linear_increasing	8.89888e-08	8.68972e-07
TPI1	-	3.19641	3.1494	3.56448	3.00525	2.97227	3.05135	3.27501	2.89474	3.23968	3.31356	2.77183	3.0755	2.3128	3.45619	1.88722	2.54278	3.96045	3.54981	3.29839	2.93969	2.98243	2.76687	2.5061	3.36104	2.75152	2.8612	1.67777	3.27173	2.10179	2.99153	3.55631	4.02727	4.28919	3.77172	4.72576	4.43652	4.37158	3.78422	3.79842	4.5031	4.12641	2.95763	0.390043	0.498735	0.0118365	linear_increasing	5.62467e-08	5.81216e-07
RAB11B	-	0.512763	0.432603	0.627964	0.31346	0.487441	-0.591414	0.448359	0.183665	0.760974	0.212383	0.767616	0.442239	0.30329	0.180734	0.631406	0.558114	1.03561	0.889119	0.885686	0.630172	0.000722314	0.463787	-0.921	0.755265	0.511196	0.544759	0.508534	0.411263	0.672788	0.994956	1.54974	1.4366	1.2647	1.45052	1.72408	1.4286	1.74122	1.3938	1.5757	1.72709	1.5292	0.455148	0.162567	0.411077	1.02681e-05	linear_increasing	1.14281e-09	2.03377e-08
PGK1	-	4.96315	4.84303	4.96174	4.86204	4.82294	4.9456	4.71109	4.8593	4.88851	5.03626	4.76977	4.96746	4.56836	4.71781	4.75302	5.07853	4.87387	4.40473	5.07773	4.90679	5.12392	4.58523	4.11924	4.78206	4.81657	4.84214	4.72427	4.88019	4.76118	5.08277	5.4442	5.50926	5.4676	5.38417	4.792	5.37669	4.98305	5.24587	5.33864	5.2523	5.27938	4.82431	0.227694	0.209056	0.00291385	linear_increasing	9.61585e-07	7.0811e-06
FBLN1	-	1.98517	2.7906	3.18207	3.01399	2.12807	2.299	2.34582	2.10035	2.69332	2.06364	0.957698	2.72628	2.44843	2.19912	1.44868	1.85889	2.69286	2.59887	2.11731	2.06632	1.72823	2.39288	2.95125	1.16775	1.34256	2.83385	0.611564	2.40379	0.779455	2.01105	4.05443	1.93483	4.06058	4.12525	4.54869	2.82957	3.75079	3.78569	3.03338	2.87531	3.49985	2.1313	0.800281	0.664961	0.0507005	other_trend	4.3061e-06	2.55442e-05
GC	-	2.23503	2.89715	2.84945	2.43508	2.37849	2.03137	3.0046	1.54022	2.82274	1.33327	2.66376	2.61254	2.52364	2.64327	2.65926	2.19255	3.51522	2.98666	2.32101	1.81326	0.875713	1.83801	2.73367	2.31682	1.92991	1.59113	2.57855	2.72168	2.63608	2.45524	3.83718	3.04958	4.10771	3.69282	3.76664	2.2913	4.4958	3.93073	3.03005	3.48883	3.56906	2.37118	0.632941	0.559409	0.00290467	linear_increasing	1.56986e-06	1.07376e-05
CANX	-	3.05458	2.67614	3.06421	2.98791	2.82064	2.42988	2.35635	2.7844	3.14875	3.07864	2.86959	3.28237	2.26691	2.48848	2.88863	2.53696	2.95194	2.84444	3.27911	2.90407	3.06701	2.85322	2.24577	2.85124	2.79826	2.95419	2.61553	2.68577	2.751	3.48468	3.23536	3.23501	3.29605	3.19771	3.01108	3.30087	3.14797	3.46888	3.32546	3.44694	3.26653	2.83402	0.135413	0.297779	0.00597063	linear_increasing	8.12384e-05	0.000319305
COL6A2	-	6.11201	6.0053	6.47965	6.51646	6.02559	5.91537	5.62415	6.10614	6.98342	6.05174	6.09019	6.37883	6.77216	5.4921	6.24243	6.00873	6.99711	6.42348	5.11035	6.0974	5.02623	6.02413	5.97512	5.79928	6.18588	6.08716	5.96353	5.92452	5.97729	5.75829	6.54059	5.98865	6.6033	6.90716	6.89441	6.66233	6.36631	6.43763	6.61244	6.56461	6.55774	6.0718	0.263887	0.440294	0.244395	other_trend	0.00221656	0.0053723
CS	-	2.02543	1.31873	1.63362	1.40458	1.57517	1.00576	1.59509	1.63391	1.92892	1.55338	1.71224	1.9823	1.30677	0.618924	1.5363	1.73136	1.62178	1.8184	1.90966	1.78399	1.62619	1.83325	0.980671	1.60081	1.86264	1.86178	0.712907	1.88316	1.57795	2.35658	2.3065	2.86391	2.21623	2.08337	2.01734	1.99766	1.76793	1.9965	2.07567	1.91893	2.1244	1.59974	0.299203	0.379989	0.00141388	linear_increasing	0.000314292	0.00102908
CCT7	-	1.01216	0.782416	0.634397	0.596303	0.601699	1.02054	0.925025	0.9302	0.831153	0.944087	0.413521	0.683751	0.121897	0.273505	0.36491	0.690226	0.447478	0.895906	0.969294	0.520592	0.812966	0.438494	-0.413331	0.463664	0.392937	0.752884	1.13623	0.538421	0.572899	1.17892	1.32341	1.14534	0.971526	0.889425	0.944306	0.920976	0.36789	1.1047	0.935321	0.837808	0.944071	0.651105	0.248962	0.331848	0.213568	other_trend	0.0147988	0.026215
MAOB	-	-0.0495302	0.480701	0.727229	0.426799	0.337095	0.662187	0.527722	1.23503	1.13837	0.642764	0.60666	0.607595	0.135783	-0.326393	0.544786	-0.34522	0.679551	0.331305	0.655175	0.205488	-0.56167	0.258882	-0.43008	0.879141	0.646874	0.333466	0.232867	0.0426213	0.272209	0.578962	1.1408	0.447235	1.1752	0.765152	0.805226	1.05875	0.549187	0.657462	1.19341	0.593115	0.838552	0.382546	0.281954	0.426525	0.210401	other_trend	0.00321929	0.00733112
ARPC2	-	2.32972	1.43499	1.8322	1.68283	1.54517	0.395956	1.66171	1.63503	1.83222	1.59448	1.65774	1.86198	1.41629	1.43598	1.83314	1.56753	2.13651	1.78568	2.41215	1.74397	1.95276	1.18538	-0.794167	1.45587	1.92934	1.51033	1.27014	1.83844	1.62459	2.44033	2.6076	2.59317	1.95605	2.33374	2.0722	1.9055	1.83999	2.48204	2.16059	2.25799	2.22089	1.60694	0.281049	0.597683	0.0323582	linear_increasing	0.00349096	0.00786591
LTA4H	-	3.03239	2.68486	2.51737	2.72715	2.64399	1.82633	1.89109	2.31808	2.87783	2.37436	2.96755	2.59493	2.56963	2.40438	2.68366	3.01472	2.47901	2.48515	3.76104	2.85187	3.24973	2.99989	1.10971	2.3938	2.60739	3.25576	2.22436	2.59598	2.95759	3.71635	3.62152	5.15966	3.6486	3.4062	3.15667	2.8751	3.20067	3.54074	3.37999	3.36266	3.53518	2.66053	0.616499	0.525269	0.00029135	linear_increasing	9.31177e-05	0.000359382
PPIA	-	5.35136	4.18489	5.50693	4.69714	5.0523	4.71275	5.10234	4.47017	5.229	5.37754	4.96515	5.22074	3.65309	5.06616	4.71254	5.18408	5.83219	4.90137	6.06371	4.28182	4.9262	4.39003	4.07919	5.20529	5.10822	4.86632	5.12284	5.21857	4.95392	5.6203	6.30187	6.40295	6.63893	6.39084	6.20255	6.45346	6.25155	6.35551	6.4358	6.34831	6.37818	4.96854	0.121043	0.517277	1.42941e-05	linear_increasing	2.77416e-10	6.05901e-09
OLFML1	-	-0.703062	-0.264951	-0.868551	-0.529062	-0.71677	-0.591292	-1.56269	-0.900913	0.0451648	-0.787574	-0.429567	-0.966146	-0.798701	-2.1128	-0.087645	-0.880601	-0.0882843	-0.326375	-2.43591	-1.17289	-1.82008	-0.0958795	-2.97292	-0.861631	-0.896661	-0.62925	0.0976417	-0.604635	-0.443956	-0.555497	1.26328	-0.320465	2.63978	2.74752	0.43436	1.0716	1.09676	2.22177	0.824815	1.136	1.31154	-0.832049	0.969617	0.718687	0.000394525	linear_increasing	5.65937e-09	8.05727e-08
CCT5	-	1.35965	0.896961	1.33884	1.07911	1.11279	0.96743	1.2762	1.08027	1.26889	1.28687	1.1713	1.36041	0.732258	0.923559	1.17746	1.23094	1.35857	1.12337	1.49311	1.27417	1.0704	1.02017	-0.0135776	1.29958	1.13377	1.48372	1.26728	1.40704	1.09597	1.43685	1.82348	1.36721	1.62376	1.38851	1.14192	1.22308	1.06616	1.60757	1.65361	1.0047	1.39	1.15711	0.279412	0.285683	0.0509282	other_trend	0.0307315	0.0484147
SERPINB6	-	1.25737	1.54235	1.43804	1.46502	1.08442	0.59282	1.25455	1.12014	1.65374	1.32873	1.01333	1.42119	0.661097	0.335337	-0.135724	0.986708	1.63289	1.36192	1.26532	1.16899	1.02751	1.32387	-0.98587	1.28407	1.3269	1.02453	-0.321855	1.05306	0.459144	1.72007	2.51639	2.49341	2.45833	2.86606	2.38736	2.06991	2.12647	2.5794	2.21454	2.24679	2.39587	1.01199	0.239607	0.616026	0.00498253	linear_increasing	3.5456e-08	3.81677e-07
S100A10	-	3.24247	3.24298	3.23256	3.32888	3.63432	2.64998	3.21604	3.24691	3.8234	3.82518	3.75466	3.38696	3.43562	2.91061	3.59419	3.76369	4.43093	3.59746	3.72291	3.30769	3.24359	3.92655	1.44242	3.73889	4.08221	3.67313	3.53686	3.81659	3.54307	4.26086	5.30252	5.11067	5.27105	5.7669	4.92222	5.10836	5.16518	5.62476	5.23395	5.53459	5.30402	3.48705	0.261833	0.537676	3.82607e-07	linear_increasing	1.83692e-12	8.61113e-11
PYCARD	-	-0.947102	-1.3363	-0.545519	-1.2986	-1.21719	-1.85765	-1.2413	-1.63723	-1.18731	-0.903618	-1.00683	-0.778867	-1.62063	-1.84324	-1.23846	-0.914475	-0.684976	-1.20202	-0.235481	-1.23714	-0.92546	-2.54225	-2.59956	-1.67583	-1.26871	-1.66431	-1.52227	-1.24731	-1.46351	0.0236982	0.024514	0.304992	-0.507116	-0.299544	-0.128577	-0.376136	-0.351673	-0.0254218	-0.307148	-0.173474	-0.183958	-1.26065	0.237784	0.56216	0.00192357	linear_increasing	9.31511e-07	6.9126e-06
ACTR2	+	2.76244	2.06904	2.0975	2.31933	2.16491	1.85378	2.15217	1.38276	2.24908	2.35091	2.45031	2.31004	2.05723	1.86431	2.34893	2.43665	2.43496	1.86953	2.65579	2.4081	2.40821	2.05211	1.31053	2.23248	2.22702	2.31069	1.91901	2.3096	2.19499	2.94849	2.70999	2.82444	2.48143	2.78285	2.27982	2.16277	2.18093	2.73409	2.42888	2.37115	2.49563	2.20503	0.251656	0.342257	0.0243858	linear_increasing	0.0184151	0.0314053
HADH	-	0.578092	0.0652981	0.696687	-0.0090343	0.168886	-0.00847209	-0.410299	0.0451491	0.0355475	0.503743	-0.249433	0.329924	0.0175092	-0.26617	0.55712	0.098104	0.997676	0.902191	0.856994	0.353386	0.287678	-0.0284781	-1.04585	0.503817	0.5912	0.362265	0.00854771	-0.188877	0.173195	0.471728	1.05474	1.02729	0.857311	-0.0339872	0.578702	0.300765	0.220232	0.536364	0.706949	0.641271	0.588964	0.213271	0.350826	0.429292	0.0510001	other_trend	0.0169797	0.0293714
CAP1	-	3.71584	3.19288	3.3225	3.30432	3.34722	2.96239	2.94046	3.09274	3.42988	3.61041	3.12822	3.45294	3.30567	2.75069	3.43015	3.05883	3.8462	3.20462	3.71802	3.20232	3.30026	3.01297	3.15589	2.82936	3.39555	3.36052	3.04302	3.13	3.4008	3.93661	4.16503	4.25481	3.95896	4.12177	3.89969	3.95115	4.04956	4.2054	4.10079	3.91715	4.06243	3.28604	0.126411	0.284669	3.57734e-05	linear_increasing	4.62583e-10	9.56004e-09
MDH2	-	3.3803	2.935	3.32412	3.17413	3.11674	2.85995	2.92628	2.69662	3.47495	3.37815	3.29278	3.14603	2.89865	2.27218	3.21547	3.10748	3.60914	3.01146	3.39406	3.57717	2.85834	3.10818	1.49708	3.01012	3.54557	3.31342	3.00588	3.2839	3.15887	3.82837	3.87427	4.10666	3.70392	3.6247	3.47901	3.64673	3.24183	3.59822	3.56129	3.82488	3.66615	3.11335	0.234935	0.433164	0.0054678	linear_increasing	0.000466313	0.00142716
HSPA1B	-	4.19182	4.60194	4.77557	4.4557	4.10122	4.59357	3.44523	4.32112	4.48882	4.61307	3.65166	4.46669	3.58096	3.39885	3.6786	3.90764	4.52662	4.48206	4.2604	3.64889	4.37338	3.67049	3.66434	3.7692	3.77673	4.19613	3.68072	3.79356	3.46375	4.37707	5.00475	4.70685	4.79167	4.79306	5.18812	4.81054	4.54391	4.43956	4.9679	4.55325	4.77996	4.06519	0.231427	0.424847	0.123517	other_trend	1.14649e-05	5.90763e-05
TJP1	-	-2.50906	-1.46344	-0.914619	-2.52094	-1.10447	-1.59589	-1.9744	-1.24512	-1.19283	-1.60635	-1.65051	-1.31569	-2.34429	-2.90777	-1.85724	-0.833497	0.187389	-0.85086	-0.6502	-1.52343	-0.0729139	-0.432209	-3.78974	-1.29306	-0.564939	-0.7632	-2.57275	-2.17194	-1.84315	-0.120135	1.9547	0.702449	1.90837	1.98133	0.929476	1.87464	0.350524	1.64977	1.44707	1.92072	1.47191	-1.44991	0.598404	0.904184	2.83691e-06	linear_increasing	1.3737e-11	4.40042e-10
PRDX1	-	5.11522	5.36385	5.2096	5.22086	4.97947	4.79659	4.79007	4.77689	5.06103	5.0151	4.71008	5.03048	4.49084	4.79612	4.89576	4.56253	5.19514	4.82807	5.45599	4.85628	5.18045	4.82458	4.12459	4.75579	4.726	5.11238	4.69867	4.78191	4.77351	5.25188	5.47782	5.68238	5.38374	5.51124	5.76327	5.76708	5.18862	5.65072	5.51938	5.73634	5.56806	4.91266	0.18786	0.279376	0.0072602	linear_increasing	3.49887e-08	3.79933e-07
ADH5	-	1.64872	1.15129	1.20756	1.3596	1.31189	1.13398	1.53632	1.19881	1.39527	1.48087	1.20477	1.52464	1.53038	1.51542	1.39876	1.48425	1.4856	1.48128	0.815858	0.587977	0.89124	1.03355	-0.21315	1.28558	1.40589	0.509134	0.762542	1.22026	1.50304	1.1874	1.62513	2.28723	2.60226	2.04834	2.4644	1.95625	2.72372	2.36699	2.29625	1.92117	2.22917	1.20129	0.338771	0.394977	0.00462546	linear_increasing	8.02645e-09	1.08939e-07
HNRNPL	-	1.75187	1.3543	2.12371	1.19474	0.940634	0.973358	0.138999	1.13495	0.99306	1.47699	0.737992	1.44249	-0.0423199	-0.433737	0.533219	0.740751	2.01328	1.21852	1.55677	1.17096	0.889612	1.52054	-1.68831	0.487937	0.411887	1.1506	-0.257664	0.755527	-0.211868	1.83432	2.13831	2.11123	1.98419	1.6501	2.33587	2.13086	1.6645	1.98531	1.99204	2.27284	2.02652	0.86377	0.227145	0.819556	0.125436	other_trend	8.58901e-05	0.000334171
SPTAN1	-	4.66686	4.32238	4.5671	4.48584	4.83143	4.27267	4.48974	4.49159	4.85367	4.82204	4.87197	4.63998	4.26774	4.12126	4.51604	4.95569	5.54784	5.15974	4.33771	4.83971	4.29137	5.33104	3.24592	4.59302	5.05084	5.18615	4.10555	4.86193	4.63914	5.33454	6.21875	5.44162	5.94891	6.36958	6.10788	6.41413	5.82093	6.18687	5.94888	6.22379	6.06814	4.65668	0.289684	0.456693	3.4166e-06	linear_increasing	3.96416e-11	1.10422e-09
TNXB	-	1.27398	2.21671	2.41926	2.51344	2.07269	1.26338	0.842557	2.13987	3.26076	2.8055	2.1915	2.36064	2.16307	1.15263	2.21204	1.88866	3.17333	2.14977	1.06795	1.38448	1.52603	2.87906	2.3385	2.06036	2.63881	1.82306	1.87508	2.08105	1.41865	2.82594	2.52513	1.40938	3.42297	2.96564	3.12403	3.92227	2.24455	2.21271	2.28737	3.66058	2.77746	2.06729	0.777543	0.622449	0.0539181	other_trend	0.00562022	0.0117175
LAMC1	-	2.48585	1.99032	2.25825	2.41583	2.43286	1.95078	0.342729	1.39713	2.31294	2.20531	2.21771	2.3747	0.835572	-0.68503	2.30634	2.59872	3.40164	3.22917	1.92472	2.46879	1.01274	3.24452	1.1795	1.32946	2.49692	2.50011	1.57328	2.99655	1.90806	2.94978	4.79644	4.5685	5.08605	5.58538	5.11126	5.30366	4.18512	5.1095	4.51976	5.81097	5.00767	2.05517	0.499559	0.889783	6.79171e-06	linear_increasing	4.17203e-12	1.63783e-10
REEP5	-	0.0783095	0.0235692	1.19129	-0.170514	0.252343	-0.255904	-0.381523	0.123613	0.602674	0.723221	-0.059447	0.443681	-1.23033	-0.458733	0.324069	0.415719	0.787903	-0.642102	0.643523	0.262136	0.446991	0.0737879	-0.455925	-0.0262657	0.497548	0.0667608	-0.0950619	-0.16308	-0.122991	1.0213	1.34136	1.53733	1.22676	1.2541	0.988226	1.3223	1.05267	1.17812	0.892616	1.70248	1.2496	0.130552	0.245353	0.511853	0.000551104	linear_increasing	8.02807e-08	8.03644e-07
CCT8	-	1.63702	1.42949	1.19157	1.26192	1.15846	1.18161	0.965828	0.545337	1.45782	1.40647	0.927745	1.37779	0.600468	0.774396	1.18021	0.74434	1.54746	1.36084	1.51796	1.5029	1.50209	0.75894	0.133854	0.856384	0.949849	1.49296	0.465931	1.20044	1.07105	1.6901	1.90405	1.63687	1.54335	1.20536	1.5324	1.74582	1.57896	1.78208	1.64247	1.65495	1.62263	1.12971	0.186156	0.38829	0.0494335	linear_increasing	0.000446133	0.00138749
CAVIN1	-	2.94472	2.89863	2.86092	3.72653	3.56206	2.88391	3.12641	3.4734	3.30463	3.65483	3.36938	3.53604	3.07801	1.99429	3.42954	3.61006	4.54908	3.42172	3.38733	3.94212	2.96195	4.17026	1.62875	3.71166	3.9685	3.72705	3.26427	3.42006	3.37199	3.59354	5.18635	4.24889	5.12521	5.30163	4.95203	5.24736	4.58133	5.16613	5.11775	5.20081	5.01275	3.35239	0.337389	0.572372	3.18123e-06	linear_increasing	1.68368e-10	3.89884e-09
HSPG2	-	5.54875	5.43381	5.63999	5.46529	5.64967	5.50874	5.16132	5.28918	5.75226	5.4634	5.58303	5.84734	5.23326	4.51683	5.70055	6.01665	6.29819	6.1141	4.80841	5.53009	4.9372	5.9742	4.73609	5.38709	5.83627	5.84344	5.35875	6.07283	5.42266	5.66389	6.25768	5.67276	6.61594	6.68227	7.3117	6.80157	6.12342	6.62698	6.67879	7.00262	6.57737	5.52644	0.462143	0.413936	0.000303181	linear_increasing	5.22806e-08	5.49089e-07
TKT	-	4.21097	4.05192	4.24942	4.11394	4.20057	4.04349	4.22067	4.04766	4.4566	4.30035	4.24237	4.24943	3.69946	3.44458	4.13205	3.95359	4.43677	4.02576	4.49519	4.05793	4.26557	3.82508	3.2008	3.87125	4.04056	4.39552	3.68432	4.23308	4.06181	4.88457	4.8995	5.28622	4.57912	4.90121	4.63657	4.88695	4.94527	4.90977	4.8718	5.08431	4.90007	4.10318	0.199614	0.323182	0.000355465	linear_increasing	9.4168e-09	1.22291e-07
RTN4	-	1.64368	1.20314	1.39633	1.4744	1.76941	0.991712	2.18818	1.32762	2.40296	1.56533	1.77397	1.39168	1.3874	1.28954	1.39985	1.95484	2.0519	2.00356	1.20677	1.81286	1.83286	2.1928	0.835326	1.98311	2.03745	1.6193	1.45834	1.68878	1.55519	2.43859	2.97177	2.30107	1.95295	2.5948	2.63752	2.39634	2.53237	2.87006	2.55883	2.83495	2.56507	1.66256	0.300252	0.39716	1.57217e-05	linear_increasing	9.58497e-08	9.21116e-07
WDR1	-	3.09569	2.99548	2.85948	2.8716	2.75297	2.8019	2.78215	2.52129	2.90998	2.78906	2.95082	3.05001	2.26135	2.22546	2.68657	3.03075	2.82493	2.53785	3.03789	2.73022	2.65225	2.95244	0.809406	2.7534	2.63476	3.00318	2.15005	2.84235	2.48341	3.39178	3.15152	3.33009	2.87539	3.19856	3.79221	3.40402	3.25567	3.2748	3.48578	3.08083	3.28489	2.71295	0.247092	0.44932	0.0796725	other_trend	0.000486382	0.00147856
SERPINB1	-	2.60317	2.83204	3.14292	2.64842	2.56843	2.16976	2.51437	2.32184	2.65134	2.70163	2.25786	2.97794	1.34469	1.96002	2.63507	3.05043	3.18353	2.58534	3.0483	2.68752	2.59403	2.93414	0.969553	2.3535	2.76799	2.54092	2.33557	2.40721	2.62883	3.18753	3.26984	3.27417	2.75801	3.17289	3.02011	2.87154	2.70505	3.42384	3.18565	2.64039	3.03215	2.55346	0.273543	0.48722	0.0537718	other_trend	0.00556511	0.0116516
ATP5F1B	-	4.8985	4.42363	4.74409	4.43724	4.60583	4.44897	4.4027	4.34436	4.77582	4.89775	4.52771	4.74315	4.50503	4.08634	4.62679	4.63144	4.99137	4.62168	4.9031	4.48706	4.52595	4.26524	3.65403	4.35941	4.62141	4.61603	4.29146	4.41343	4.51681	5.13607	5.18182	5.24929	5.07582	5.07509	4.9317	5.13199	4.87113	5.1177	4.86674	5.11483	5.06161	4.55008	0.13001	0.287272	0.00376426	linear_increasing	3.63438e-06	2.21053e-05
SORBS3	-	-0.75084	-0.374	-0.0132596	-0.829641	-0.733573	-0.407099	-1.4103	-0.598183	-0.154588	-0.64811	-0.556979	-0.502411	-1.07389	-2.29241	-1.42567	-1.13708	-0.676532	0.124201	-1.32256	-1.20068	-1.39822	-0.679434	-0.220795	-1.33787	-0.649295	-0.216076	-1.13232	-2.32873	-1.14174	-0.821958	-0.231033	-0.411785	0.475402	0.200324	0.499681	0.384546	0.121201	0.451193	0.770692	0.458914	0.271914	-0.863669	0.360571	0.583608	0.057163	other_trend	1.18555e-06	8.40937e-06
LYZ	-	3.58578	3.89288	2.95884	3.36155	2.82148	2.5536	1.33613	2.6537	2.77023	2.30203	1.74324	2.67302	2.09821	1.85132	2.14884	2.35981	4.41575	5.28897	2.79497	2.00749	2.79698	2.58553	3.20404	2.11443	2.96619	3.98593	1.9596	1.91184	1.23558	3.47041	3.11527	4.73913	4.43567	4.16012	4.54402	3.68429	3.15433	3.12952	4.10692	3.96493	3.90342	2.72828	0.608498	0.901237	0.0505741	other_trend	0.000471541	0.00143858
RSU1	-	1.22695	1.36501	1.34119	1.99255	1.54624	1.12154	1.00896	1.22647	1.87414	1.62712	1.87539	1.87008	1.31587	0.81356	1.27896	1.55837	2.47014	1.66764	1.74891	1.4444	1.2123	1.79515	0.507386	1.37856	1.45421	1.73479	1.10216	1.59676	1.0669	1.81987	1.9319	1.80558	2.19067	2.36496	2.79402	2.27661	1.43144	2.16618	2.53702	2.2928	2.17912	1.46805	0.383424	0.393994	0.00407699	linear_increasing	1.44074e-05	7.19751e-05
ENO1	-	5.6003	5.0069	5.49518	5.37294	5.35954	4.71227	5.11542	5.44574	5.50212	5.68982	5.1914	5.37335	5.04893	4.69472	5.24139	5.26725	5.70105	5.01777	5.58997	5.51576	5.52456	5.31532	4.47439	4.86312	5.33571	5.14353	5.03995	5.11073	5.23684	5.95122	6.00543	6.22565	5.76079	5.67342	5.8457	5.98766	5.71814	6.16009	6.22892	6.25349	5.98593	5.26457	0.225717	0.325978	0.00127297	linear_increasing	1.28346e-07	1.20332e-06
ESD	-	1.51506	0.777464	1.27674	0.954853	1.30462	1.38086	1.65495	0.545127	1.45792	1.14495	1.23546	1.45428	0.849073	1.338	0.98283	1.09799	1.71259	1.15425	1.5075	1.25037	0.775793	0.0899826	0.410998	1.74401	1.44993	0.68942	1.764	1.28806	1.25049	1.2668	2.07207	2.49961	2.12683	1.99737	2.13926	1.85959	2.23745	2.13087	2.09791	1.87094	2.10319	1.17748	0.183569	0.402227	0.000220794	linear_increasing	2.51815e-08	2.78371e-07
[truncated: 1,043 more rows]
[truncated: 64 more columns]
